# Supplementary material for: Deciphering the endogenous SUMO-1 landscape: a novel combinatorial peptide enrichment strategy for global profiling and disease association
Source: Royal Society of Chemistry journal article supplement (doi:10.1039/d4sc07379g), 2024-12-26
Supplement: d4sc07379g3.xlsx [file d4sc07379g3.xlsx]

## Sheet: control-site
Protein	Position
F5H3Q5	1445
A0A087X1N7	1819
A0A1W2PNU5	187
E9PSC0	80
F8WEL9	31
I3L4X7	83
M0QZW8	42
M0QZW8	43
K7EP06	2
O15479	250
Q96ST3	552
O95405	745
Q14152	591
Q14204	1827
Q14204	1829
Q17RD7	466
Q4G0X9	1014
Q8N141	118
Q8N4T0	64
Q9BXP2	623
Q9BZA5	12
Q9H9L3	336
A0A0A0MRA3	26764
C9J8E1	184
E9PLY0	20
H0Y7Y8	277
H0Y7Y8	278
O00533	1030
O14807	15
O14807	26
P10809	89
Q562F6	491
Q5THR3	752
Q8WXG1	298
Q96KP1	827
Q9BXP5	256
Q9HCL3	175
A0A0A0MRI1	303
A0A1W2PPZ5	199
A0A1W2PPZ5	202
A0A5F9ZHS8	652
A2A3C1	1044
A2A3C1	1046
C4AMC7	138
E9PLM8	115
O00505	121
P01266	413
Q15545	333
Q6ZSZ6	352
Q6ZSZ6	353
Q8IY21	674
Q9BRU9	172
Q9BYW2	11
H7C0A4	122
A0A087X1G6	32
A6NJR5	249
H7C5Q9	111
Q8NEM2	108
F5H1B1	224
H0YDN1	3372
J3KPJ3	163
O60673	604
P00519	816
Q9NRW1	158
Q5T0Z8	915
Q8N6L0	383
Q8NB50	643
Q9BRF8	314
Q9NYL2	538
A0A0A0MTN5	447
A0A0A0MTN5	450
B8ZZX6	287
Q15149	1224
Q5VSL9	571
Q5W0A0	327
Q9ULN7	176
Q9ULN7	178
Q9ULN7	179
A0A087WZ32	90
A0A087WZ32	91
E5RI44	49
E9PRL4	33
J3KSK6	293
K7EN81	228
Q6ZUB1	1289
Q6ZUB1	1291
Q9NQ30	179
A0A075B6G6	435
A0A0D9SFK2	6
K7EN58	72
A0A0D9SFJ2	35
A0A1W2PPR9	226
A0A590UJN0	319
Q68CT8	73
P11387	333
Q14814	511
Q5SW24	105
A0A087WW88	64
A0A087WW88	67
A0A0A0MT33	103
A0A0C4DH01	402
A0A0G2JNU3	1271
A0A2R8YGQ5	1287
A0A2R8YGQ5	1294
A0A384DVL8	913
A0A384DVL8	915
A0A494C108	648
A0A494C108	649
A0A5F9ZH90	207
C9JE76	39
E9PSC0	84
F8WBJ1	55
F8WEL9	34
H0YDE6	71
H0YE03	402
H0YE03	405
I3L1A7	53
I3L1A7	61
I3L4X7	75
K7ERW6	5
K7ERW6	12
W0S4B9	202
Q14674	515
Q14674	516
Q6N065	222
Q6UXY1	135
Q8IYU8	273
Q8IYU8	280
Q8WXA8	196
Q9ULL0	1248
A0A2R8Y4D7	168
H0YNU5	629
A0A499FJK2	56
C9J8E1	179
E5RH56	69
F6WQW2	244
F6WQW2	245
H0Y2M6	770
H0Y589	401
I3L2N8	26
O76038	56
P51786	412
Q8WXG1	334
Q9BQG1	180
R4GMW4	15
R4GMW4	16
E9PJR2	405
H0YM35	55
P08567	238
Q8IWR0	574
Q9BRU9	179
Q9Y230	204
Q9Y2P5	317
P31939	331
P48065	272
S4R411	136
Q96N58	266
A0A0A0MQZ3	123
A0A1C7CYW9	105
H0Y9K3	429
A2RTY3	400
N0DVX5	2248
Q02363	47
Q9NRW1	164
Q9NYL2	544
Q99829	20
Q99829	25
H0YDJ4	1074
H0YDJ4	1076
E7EWP9	624
F5H212	1271
H0Y6N7	407
P26639	694
Q8IVG5	790
Q8IYX3	269
Q96NB2	170
Q6P452	221
A0A0D9SFJ2	37
A0A0J9YVW6	55
A0A3B3ITR6	99
A0A590UJN0	325
Q68CT8	76
A8MT70	529
H0Y718	321
H0Y718	322
H0Y8C3	176
P11387	336
Q8IZT6	654
Q9HBD4	1395
E9PDB0	261
H7BZ98	110
B4DJS2	51
H0Y4S6	164
O60925	97
F8WCL7	244
H0YM35	62
O00139	336
Q7Z5P9	7836
A0A0C4DGY0	70
E9PK69	288
C9J5I7	43
Q16720	1064
A0A0C4DFY3	885
B1B0D4	94
E9PQL1	50
F5H6D6	146
F5H6D6	149
A0A0J9YVW6	56
Q9Y4D2	404
H0Y380	882
P24298	483
Q9NYN1	261
A0A590UJ53	577
H3BMM1	1207
C9J338	259
H0Y7V6	91
H0YDG2	102
Q8IY18	595
K7ENR9	27
A0A1B0GTC0	90
H1UBN3	324
C9JQQ5	164
Q6P2C6	253
Q9UNQ0	251
C9JMH2	35
F8W9Z1	1765
Q8N412	204
Q8N412	210
Q8TCU3	10
Q9UQR0	64
Q5SZW9	13
Q96RL1	305
K7EPM2	11
B5MCE1	318
F8W0U9	704
H7C118	58
K7EM17	70
K7EM17	71
Q8TCU3	6
Q9Y4Z2	79

## Sheet: control-protein
Protein
F5H3Q5
A0A087X1N7
A0A1W2PNU5
E9PSC0
F8WEL9
I3L4X7
M0QZW8
K7EP06
O15479
Q96ST3
O95405
Q14152
Q14204
Q17RD7
Q4G0X9
Q8N141
Q8N4T0
Q9BXP2
Q9BZA5
Q9H9L3
A0A0A0MRA3
C9J8E1
E9PLY0
H0Y7Y8
O00533
O14807
P10809
Q562F6
Q5THR3
Q8WXG1
Q96KP1
Q9BXP5
Q9HCL3
A0A0A0MRI1
A0A1W2PPZ5
A0A5F9ZHS8
A2A3C1
C4AMC7
E9PLM8
O00505
P01266
Q15545
Q6ZSZ6
Q8IY21
Q9BRU9
Q9BYW2
H7C0A4
A0A087X1G6
A6NJR5
H7C5Q9
Q8NEM2
F5H1B1
H0YDN1
J3KPJ3
O60673
P00519
Q9NRW1
Q5T0Z8
Q8N6L0
Q8NB50
Q9BRF8
Q9NYL2
A0A0A0MTN5
B8ZZX6
Q15149
Q5VSL9
Q5W0A0
Q9ULN7
A0A087WZ32
E5RI44
E9PRL4
J3KSK6
K7EN81
Q6ZUB1
Q9NQ30
A0A075B6G6
A0A0D9SFK2
K7EN58
A0A0D9SFJ2
A0A1W2PPR9
A0A590UJN0
Q68CT8
P11387
Q14814
Q5SW24
A0A087WW88
A0A0A0MT33
A0A0C4DH01
A0A0G2JNU3
A0A2R8YGQ5
A0A384DVL8
A0A494C108
A0A5F9ZH90
C9JE76
F8WBJ1
H0YDE6
H0YE03
I3L1A7
K7ERW6
W0S4B9
Q14674
Q6N065
Q6UXY1
Q8IYU8
Q8WXA8
Q9ULL0
A0A2R8Y4D7
H0YNU5
A0A499FJK2
E5RH56
F6WQW2
H0Y2M6
H0Y589
I3L2N8
O76038
P51786
Q9BQG1
R4GMW4
E9PJR2
H0YM35
P08567
Q8IWR0
Q9Y230
Q9Y2P5
P31939
P48065
S4R411
Q96N58
A0A0A0MQZ3
A0A1C7CYW9
H0Y9K3
A2RTY3
N0DVX5
Q02363
Q99829
H0YDJ4
E7EWP9
F5H212
H0Y6N7
P26639
Q8IVG5
Q8IYX3
Q96NB2
Q6P452
A0A0J9YVW6
A0A3B3ITR6
A8MT70
H0Y718
H0Y8C3
Q8IZT6
Q9HBD4
E9PDB0
H7BZ98
B4DJS2
H0Y4S6
O60925
F8WCL7
O00139
Q7Z5P9
A0A0C4DGY0
E9PK69
C9J5I7
Q16720
A0A0C4DFY3
B1B0D4
E9PQL1
F5H6D6
Q9Y4D2
H0Y380
P24298
Q9NYN1
A0A590UJ53
H3BMM1
C9J338
H0Y7V6
H0YDG2
Q8IY18
K7ENR9
A0A1B0GTC0
H1UBN3
C9JQQ5
Q6P2C6
Q9UNQ0
C9JMH2
F8W9Z1
Q8N412
Q8TCU3
Q9UQR0
Q5SZW9
Q96RL1
K7EPM2
B5MCE1
F8W0U9
H7C118
K7EM17
Q9Y4Z2

## Sheet: MG132-site
Protein	Position
A0A590UJ53	577
A0A5H1ZRP3	255
G3V1B0	63
A0A1P0AZG4	939
A0A2R8Y714	648
A0A2R8Y7H4	102
C9JYB8	385
B3KRD8	302
C9J8E1	184
E7ESC9	500
E7ESC9	502
F5H619	296
F8W9S7	1132
F8WEL9	31
H9KVB4	2936
O15144	290
O95405	745
Q5TEJ7	149
P22223	132
P22223	135
P48775	323
Q14152	591
Q14574	42
Q17RD7	466
Q32NC0	201
Q5T4S7	3564
Q6VUC0	186
Q6VUC0	187
Q6ZNB6	507
Q8IVG5	680
Q8IVG5	681
Q8N141	118
Q8N6L0	383
Q9BXP5	256
Q9H9L3	336
Q9P275	1091
Q9P275	1100
Q9UDR5	825
Q9Y597	237
E9PLX9	122
A0A090HNM7	882
A0A090HNM7	884
Q5JRI7	170
Q5JRI7	173
A0A0D9SFR6	474
A0A0S2Z4L7	102
H7C0S8	37
C9JT67	792
C9JG08	825
E9PLY0	20
H0YCZ2	370
F5H746	7
F5H746	9
H0YD12	55
Q15149	1224
O00505	121
O60869	143
O60869	148
P15927	145
Q01201	62
Q08378	362
Q15751	458
Q15751	459
Q5W041	51
Q6PCB5	450
Q6ZSZ6	352
Q6ZSZ6	353
Q86XZ4	527
Q86XZ4	528
Q92522	106
Q92522	115
Q9BRX8	65
Q9BRX8	67
Q9C073	369
Q9NW75	62
A0A075B7B1	280
A0A286YF92	299
A0A494C1D7	1764
A0A669KB69	97
A2A2S5	51
A5YKK6	1218
H7C223	15
H7C223	19
C4AMC7	138
C9JG08	1935
C9JGI3	43
D6RC76	172
E9PLM8	115
E9PNF6	6
E9PNF6	7
F5H435	152
H0YDN1	1114
H7C4M9	52
O00267	639
O94887	652
O94887	655
O95714	1231
P04844	243
P0DKX0	161
P10244	584
P49327	1495
P50991	531
Q8NDV3	499
Q9BV73	959
Q9NQU5	412
Q9ULN7	176
Q9ULN7	178
Q9ULN7	179
E7EUL6	719
E7EUL6	721
E5RK98	47
O95235	560
Q8WYQ5	673
Q9HCL3	175
F5H8K3	345
A0A0A0MRI1	303
E7ENN3	2851
E7ENN3	2853
E9PG22	436
G3XAE0	293
H0YKG4	13
P01023	896
Q6ZUB1	1289
Q6ZUB1	1291
Q96I27	29
Q9BRF8	314
Q9UBL6	329
A0A087WVY5	971
H0YEP2	91
A0A0B4J1Y2	488
A0A1B0GWA2	368
A0A1B0GWA2	370
F5H008	83
A0A2U3TZV8	340
E5RJ39	118
E5RJ39	120
H7C5R1	608
F5GWH6	86
F5H088	220
F5H088	222
H0Y517	16
H0Y8H1	77
H3BQN4	14
H7C1W4	225
H7C352	120
I3L4X7	83
K7EQS1	92
P20700	452
Q8NA97	97
Q8TD19	908
Q9BX84	741
Q9NYL2	680
J3KNQ3	294
H0YM61	428
A0A0G2JIZ4	154
A0A0G2JIZ4	157
A0A0G2JIZ4	158
A0A0G2JNQ3	271
C9JJZ7	50
E7EX40	160
E9PDH4	347
E9PDH4	356
H0YAU5	235
H0YAU5	239
Q8N4N8	473
Q8N4N8	479
P55884	734
Q70J99	235
Q9NSV4	681
Q9Y6V0	3256
A0A087WXQ8	68
A0A0A0MRA3	7255
F5H2N6	636
O15479	250
O60566	393
Q5VWC8	228
Q8NF50	585
Q9C0D5	3
O60882	116
Q5SZW9	13
Q8IZT6	654
A0A075B730	2728
A0A087WTW5	1263
A0A087WYS1	172
A0A087WYS1	173
A0A0A0MT33	103
A0A0C4DH01	402
A0A0J9YW64	1752
A0A2R8Y714	658
A0A669KBF1	471
A6NMZ7	1626
B3KRD8	314
C9J8E1	179
C9JBM0	173
E7EMZ9	662
E7ETR0	208
E9PIF9	43
F8WEL9	34
G3V1S3	738
H9KVB4	2934
I3L2K5	484
M0R1M3	61
O15144	295
O95429	418
P18669	176
P19525	408
Q4G0P3	3994
Q6NUP7	669
Q6UX06	112
Q93073	242
R4GMW4	15
R4GMW4	16
A0A494C1Q1	48
E5RFS7	37
E5RFS7	39
A0A087WX60	689
A0A087WX60	693
C9JNZ1	161
C9JNZ1	162
A0A0A0MTS9	32
A0A0D9SFR6	477
A0A2R8Y6H3	1496
A0A384DVL8	913
A0A384DVL8	915
A0A3B3IU23	661
A0A5F9ZH29	165
H7BXL8	377
C9JE76	39
E9PDI4	196
F8W6S9	35
H0YA96	141
H0YA96	142
O14965	365
O60240	196
P05388	162
P05388	166
P11388	431
P31939	331
Q14674	515
Q14674	516
Q15459	391
Q6P9A3	223
Q6UVJ0	439
Q8IYU8	273
Q8IYU8	280
Q8NEG7	540
Q9H040	341
Q9ULW8	595
Q9UPA5	3478
A0A494C1D7	1759
B7Z7N5	532
B7Z7N5	536
O14646	347
O14646	348
O95714	1236
Q14693	770
Q14693	771
Q6ZN84	258
K7ELE1	397
F8VRX1	732
H0Y6N7	407
H0YIK5	130
J3KRQ4	52
P10244	580
Q00534	279
Q8NEE8	21
Q92665	254
B3KV94	1118
M0QZB5	534
H0Y4W2	619
F8WCD0	277
H3BN68	60
Q08462	586
Q86XZ4	294
Q8IY81	845
Q93008	506
Q9BQG1	180
Q9HD15	158
Q9HD15	159
A0A087WX12	134
A0A0C4DGF0	287
A0A0G2JNU3	1271
C9IZY8	444
C9J7Z4	327
C9J7Z4	330
D6RBP4	53
D6RJD8	38
D6RJD8	41
E7EQL2	641
I3L4X7	75
P21399	852
Q8TD19	915
A0A6I8PRP6	402
H0YDJ4	1074
H0YDJ4	1076
H0Y858	388
H9KVB3	1618
Q8IVG5	790
Q8IY81	328
Q96QV1	247
A0A0C4DG33	368
A0A0C4DG33	369
D6RJA6	138
D6RJA6	139
E7ESJ2	659
E7EWP9	624
I3L0G6	512
I3L0G6	515
P07900	410
Q96NB2	170
Q9BTV7	183
A0A2R8Y5K2	439
A0A0G2JMG3	872
A0A590UJM5	437
H7BZ37	86
O00139	336
Q8TB73	356
H7BZ98	110
J3KRK3	7
F5H7B7	479
D6RFY1	19
E9PNF6	3
O00443	1154
P16519	128
Q9H9J2	226
Q9Y5G8	596
S4R3D7	76
E9PFX5	228
E9PG22	419
F8WCD0	279
H3BUI8	198
A0A087WX12	129
A0A087X097	2804
H0YCZ2	1266
H7BY35	1358
Q6NT04	405
Q9NPB8	150
Q9NPB8	151
Q9UIK5	253
F5H9F7	128
E7ESW6	2140
O43678	13
O95789	973
P05556	398
P26639	306
Q6UVJ0	465
Q8IWN7	1093
Q8TAK6	109
Q9NP58	143
H0Y9U8	52
O60566	400
A0A087WYA1	1887
A0A5K1VW97	1948
A0A0A0MRA3	11026
A0A1W2PPR9	226
A0A6E1Y6F7	931
A0A6E1Y6F7	936
A0AVT1	963
J3QRX1	110
E7ER26	769
H3BPS6	3
F8W922	129
J3KPJ3	163
M0QZW8	42
M0QZW8	43
M0QXK2	80
O43252	593
P49454	919
Q07092	1449
Q49AH0	75
Q5TCQ9	1412
Q5VSL9	571
Q86XT4	283
Q8IY21	674
Q99611	58
A0A087X2D8	97
A0A087X2D8	102
A0A3B3ISQ1	65
P48634	819
Q008S8	453
Q14204	1827
Q14204	1829
Q7Z494	1087
Q99928	53
Q9BST9	44
Q9NWU2	215
I3L4C0	105
Q2YDW8	235
Q2YDW8	108
E9PH18	208
H0YLT1	16
K7EPH5	82
O60673	604
Q8TC07	597
Q92786	346
H0Y786	1136
A0A0A0MRE9	2587
A0A140TA65	79
A0A140TA65	87
B1AQ67	81
C9JIX7	174
P0C671	14
P0C671	15
Q8TEK8	182
H7C557	1081
O14807	15
O14807	26
P24298	483
P48960	731
Q7RTY7	412
Q9Y3B7	73
C9JAW0	113
K7EQL6	1207
A0A087WW66	838
O95782	57
A1A4Z1	179
A8MW95	409
C9JS30	749
M0QZQ3	231
Q9Y238	233
C9JFP6	64
E9PIN8	7
O95989	3
Q8NCR0	486
Q8NCR0	488
Q9NXL2	16
Q9NXL2	17
A0A087WYA1	1883
A0A0A0MRA3	11018
K7EKZ0	218
K7EKZ0	222
A0A1D5RMR8	5
A0A2R8YGQ5	1287
A0A2R8YGQ5	1294
Q5JYW6	50
E7ER26	772
F8W922	128
H0YE03	402
H0YE03	405
I3L2N8	26
K7ERW6	5
K7ERW6	12
Q5TCQ9	1409
Q96ND8	180
A0A075B719	515
A0A075B774	505
A0A0A0MS97	155
H0Y390	3247
C9JHU5	511
G5E9S8	12
E9PQR0	225
F5H6M0	114
H0YBG8	18
H0YCU9	14
I3L1A7	53
I3L1A7	61
S4R2Y3	30
S4R2Y3	35
P11717	1990
P48065	272
P56192	554
Q5TAH2	399
R4GMZ7	59
Q6UXY1	135
Q8N895	534
Q93008	2301
Q93034	501
A0A075B739	46
Q5JRI7	157
C9J5F6	379
E9PN78	280
F5H0E0	108
F8WAD8	534
H0YNS4	41
K7EQQ1	99
O95948	13
P10643	593
Q14680	491
Q6PI77	63
Q6PI77	65
Q6PI77	71
Q92786	353
Q96JB3	30
J3KRZ8	417
J3KRZ8	420
E9PJR2	405
F2Z3C1	78
F6WQW2	244
F6WQW2	245
K7EPM2	11
Q9Y3Q4	588
A0A0A0MRS1	355
E3W994	276
A0A2R8YFE7	85
C9JMH2	35
K7EQB2	72
O14863	345
Q15067	510
Q15067	512
Q6V0I7	4052
Q6V0I7	4053
Q76FK4	1158
Q96RL1	305
A0A0C4DGY8	18
H3BR89	137
A6NKB5	94
Q15075	1112
Q9P2G4	520
A0A087WW66	827
P0DO97	240
Q5VU65	993
Q9H4Z3	313
E9PS71	72
H0YB89	86
H7C4T4	106
Q3KP31	568
Q5T985	419
O95158	98
Q6P9A2	269
Q8N895	541
Q9NUD5	162
A0A2R8Y491	319
P78527	2268
D6RHY3	79
Q9Y6E7	55
H0Y8N7	174
A0A087WX48	182

## Sheet: MG132-protein
Protein
A0A590UJ53
A0A5H1ZRP3
G3V1B0
A0A1P0AZG4
A0A2R8Y714
A0A2R8Y7H4
C9JYB8
B3KRD8
C9J8E1
E7ESC9
F5H619
F8W9S7
F8WEL9
H9KVB4
O15144
O95405
Q5TEJ7
P22223
P48775
Q14152
Q14574
Q17RD7
Q32NC0
Q5T4S7
Q6VUC0
Q6ZNB6
Q8IVG5
Q8N141
Q8N6L0
Q9BXP5
Q9H9L3
Q9P275
Q9UDR5
Q9Y597
E9PLX9
A0A090HNM7
Q5JRI7
A0A0D9SFR6
A0A0S2Z4L7
H7C0S8
C9JT67
C9JG08
E9PLY0
H0YCZ2
F5H746
H0YD12
Q15149
O00505
O60869
P15927
Q01201
Q08378
Q15751
Q5W041
Q6PCB5
Q6ZSZ6
Q86XZ4
Q92522
Q9BRX8
Q9C073
Q9NW75
A0A075B7B1
A0A286YF92
A0A494C1D7
A0A669KB69
A2A2S5
A5YKK6
H7C223
C4AMC7
C9JGI3
D6RC76
E9PLM8
E9PNF6
F5H435
H0YDN1
H7C4M9
O00267
O94887
O95714
P04844
P0DKX0
P10244
P49327
P50991
Q8NDV3
Q9BV73
Q9NQU5
Q9ULN7
E7EUL6
E5RK98
O95235
Q8WYQ5
Q9HCL3
F5H8K3
A0A0A0MRI1
E7ENN3
E9PG22
G3XAE0
H0YKG4
P01023
Q6ZUB1
Q96I27
Q9BRF8
Q9UBL6
A0A087WVY5
H0YEP2
A0A0B4J1Y2
A0A1B0GWA2
F5H008
A0A2U3TZV8
E5RJ39
H7C5R1
F5GWH6
F5H088
H0Y517
H0Y8H1
H3BQN4
H7C1W4
H7C352
I3L4X7
K7EQS1
P20700
Q8NA97
Q8TD19
Q9BX84
Q9NYL2
J3KNQ3
H0YM61
A0A0G2JIZ4
A0A0G2JNQ3
C9JJZ7
E7EX40
E9PDH4
H0YAU5
Q8N4N8
P55884
Q70J99
Q9NSV4
Q9Y6V0
A0A087WXQ8
A0A0A0MRA3
F5H2N6
O15479
O60566
Q5VWC8
Q8NF50
Q9C0D5
O60882
Q5SZW9
Q8IZT6
A0A075B730
A0A087WTW5
A0A087WYS1
A0A0A0MT33
A0A0C4DH01
A0A0J9YW64
A0A669KBF1
A6NMZ7
C9JBM0
E7EMZ9
E7ETR0
E9PIF9
G3V1S3
I3L2K5
M0R1M3
O95429
P18669
P19525
Q4G0P3
Q6NUP7
Q6UX06
Q93073
R4GMW4
A0A494C1Q1
E5RFS7
A0A087WX60
C9JNZ1
A0A0A0MTS9
A0A2R8Y6H3
A0A384DVL8
A0A3B3IU23
A0A5F9ZH29
H7BXL8
C9JE76
E9PDI4
F8W6S9
H0YA96
O14965
O60240
P05388
P11388
P31939
Q14674
Q15459
Q6P9A3
Q6UVJ0
Q8IYU8
Q8NEG7
Q9H040
Q9ULW8
Q9UPA5
B7Z7N5
O14646
Q14693
Q6ZN84
K7ELE1
F8VRX1
H0Y6N7
H0YIK5
J3KRQ4
Q00534
Q8NEE8
Q92665
B3KV94
M0QZB5
H0Y4W2
F8WCD0
H3BN68
Q08462
Q8IY81
Q93008
Q9BQG1
Q9HD15
A0A087WX12
A0A0C4DGF0
A0A0G2JNU3
C9IZY8
C9J7Z4
D6RBP4
D6RJD8
E7EQL2
P21399
A0A6I8PRP6
H0YDJ4
H0Y858
H9KVB3
Q96QV1
A0A0C4DG33
D6RJA6
E7ESJ2
E7EWP9
I3L0G6
P07900
Q96NB2
Q9BTV7
A0A2R8Y5K2
A0A0G2JMG3
A0A590UJM5
H7BZ37
O00139
Q8TB73
H7BZ98
J3KRK3
F5H7B7
D6RFY1
O00443
P16519
Q9H9J2
Q9Y5G8
S4R3D7
E9PFX5
H3BUI8
A0A087X097
H7BY35
Q6NT04
Q9NPB8
Q9UIK5
F5H9F7
E7ESW6
O43678
O95789
P05556
P26639
Q8IWN7
Q8TAK6
Q9NP58
H0Y9U8
A0A087WYA1
A0A5K1VW97
A0A1W2PPR9
A0A6E1Y6F7
A0AVT1
J3QRX1
E7ER26
H3BPS6
F8W922
J3KPJ3
M0QZW8
M0QXK2
O43252
P49454
Q07092
Q49AH0
Q5TCQ9
Q5VSL9
Q86XT4
Q8IY21
Q99611
A0A087X2D8
A0A3B3ISQ1
P48634
Q008S8
Q14204
Q7Z494
Q99928
Q9BST9
Q9NWU2
I3L4C0
Q2YDW8
E9PH18
H0YLT1
K7EPH5
O60673
Q8TC07
Q92786
H0Y786
A0A0A0MRE9
A0A140TA65
B1AQ67
C9JIX7
P0C671
Q8TEK8
H7C557
O14807
P24298
P48960
Q7RTY7
Q9Y3B7
C9JAW0
K7EQL6
A0A087WW66
O95782
A1A4Z1
A8MW95
C9JS30
M0QZQ3
Q9Y238
C9JFP6
E9PIN8
O95989
Q8NCR0
Q9NXL2
K7EKZ0
A0A1D5RMR8
A0A2R8YGQ5
Q5JYW6
H0YE03
I3L2N8
K7ERW6
Q96ND8
A0A075B719
A0A075B774
A0A0A0MS97
H0Y390
C9JHU5
G5E9S8
E9PQR0
F5H6M0
H0YBG8
H0YCU9
I3L1A7
S4R2Y3
P11717
P48065
P56192
Q5TAH2
R4GMZ7
Q6UXY1
Q8N895
Q93034
A0A075B739
C9J5F6
E9PN78
F5H0E0
F8WAD8
H0YNS4
K7EQQ1
O95948
P10643
Q14680
Q6PI77
Q96JB3
J3KRZ8
E9PJR2
F2Z3C1
F6WQW2
K7EPM2
Q9Y3Q4
A0A0A0MRS1
E3W994
A0A2R8YFE7
C9JMH2
K7EQB2
O14863
Q15067
Q6V0I7
Q76FK4
Q96RL1
A0A0C4DGY8
H3BR89
A6NKB5
Q15075
Q9P2G4
P0DO97
Q5VU65
Q9H4Z3
E9PS71
H0YB89
H7C4T4
Q3KP31
Q5T985
O95158
Q6P9A2
Q9NUD5
A0A2R8Y491
P78527
D6RHY3
Q9Y6E7
H0Y8N7
A0A087WX48

## Sheet: control-protein-metascape
GroupID	Category	Term	Description	LogP	Log(q-value)	Genes	Symbols	InTerm_InList
1_Summary	GO Biological Processes	GO:0007059	chromosome segregation	-5.96855	-1.88536	3796,7150,7273,9133,9700,10734,23137,25978,51776,147872,151246,259266,5528,1778,2241,4957,29072,55036,5339	KIF2A,TOP1,TTN,CCNB2,ESPL1,STAG3,SMC5,CHMP2B,MAP3K20,KASH5,SGO2,ASPM,PPP2R5D,DYNC1H1,FER,ODF2,SETD2,CCDC40,PLEC	19/-
1_Member	GO Biological Processes	GO:0007059	chromosome segregation	-5.96855	-1.88536	3796,7150,7273,9133,9700,10734,23137,25978,51776,147872,151246,259266	KIF2A,TOP1,TTN,CCNB2,ESPL1,STAG3,SMC5,CHMP2B,MAP3K20,KASH5,SGO2,ASPM	12/332
1_Member	WikiPathways	WP5117	Cohesin complex - Cornelia de Lange syndrome	-4.26404	-1.23424	5528,9700,10734,151246	PPP2R5D,ESPL1,STAG3,SGO2	4/34
1_Member	GO Biological Processes	GO:0098813	nuclear chromosome segregation	-3.97521	-1.01988	3796,7273,9133,9700,10734,25978,147872,259266	KIF2A,TTN,CCNB2,ESPL1,STAG3,CHMP2B,KASH5,ASPM	8/235
1_Member	GO Biological Processes	GO:0000212	meiotic spindle organization	-3.92474	-1.01988	9133,9700,259266	CCNB2,ESPL1,ASPM	3/16
1_Member	GO Biological Processes	GO:0045132	meiotic chromosome segregation	-3.47928	-0.817124	9133,9700,10734,147872,259266	CCNB2,ESPL1,STAG3,KASH5,ASPM	5/97
1_Member	GO Biological Processes	GO:0007051	spindle organization	-3.29948	-0.695644	1778,3796,9133,9700,147872,259266	DYNC1H1,KIF2A,CCNB2,ESPL1,KASH5,ASPM	6/162
1_Member	GO Biological Processes	GO:0051653	spindle localization	-3.24174	-0.645253	1778,9700,147872,259266	DYNC1H1,ESPL1,KASH5,ASPM	4/62
1_Member	GO Biological Processes	GO:0000280	nuclear division	-3.1863	-0.616948	3796,7273,9133,9700,10734,25978,147872,259266	KIF2A,TTN,CCNB2,ESPL1,STAG3,CHMP2B,KASH5,ASPM	8/308
1_Member	GO Biological Processes	GO:0048285	organelle fission	-2.95966	-0.51516	3796,7273,9133,9700,10734,25978,147872,259266	KIF2A,TTN,CCNB2,ESPL1,STAG3,CHMP2B,KASH5,ASPM	8/334
1_Member	GO Biological Processes	GO:0000226	microtubule cytoskeleton organization	-2.65209	-0.320992	1778,2241,3796,4957,9133,9700,29072,55036,147872,259266	DYNC1H1,FER,KIF2A,ODF2,CCNB2,ESPL1,SETD2,CCDC40,KASH5,ASPM	10/552
1_Member	GO Biological Processes	GO:0051225	spindle assembly	-2.48862	-0.267501	3796,9133,147872,259266	KIF2A,CCNB2,KASH5,ASPM	4/99
1_Member	GO Biological Processes	GO:0140013	meiotic nuclear division	-2.47393	-0.261107	9133,9700,10734,147872,259266	CCNB2,ESPL1,STAG3,KASH5,ASPM	5/163
1_Member	GO Biological Processes	GO:0140694	non-membrane-bounded organelle assembly	-2.40475	-0.242128	1778,3796,5339,7273,9133,147872,259266	DYNC1H1,KIF2A,PLEC,TTN,CCNB2,KASH5,ASPM	7/324
1_Member	GO Biological Processes	GO:0051321	meiotic cell cycle	-2.39642	-0.242128	9133,9700,10734,147872,151246,259266	CCNB2,ESPL1,STAG3,KASH5,SGO2,ASPM	6/244
1_Member	GO Biological Processes	GO:1903046	meiotic cell cycle process	-2.27183	-0.195111	9133,9700,10734,147872,259266	CCNB2,ESPL1,STAG3,KASH5,ASPM	5/182
1_Member	GO Biological Processes	GO:0045143	homologous chromosome segregation	-2.1465	-0.134041	9700,10734,147872	ESPL1,STAG3,KASH5	3/64
1_Member	GO Biological Processes	GO:0007127	meiosis I	-2.14312	-0.132205	9133,9700,10734,147872	CCNB2,ESPL1,STAG3,KASH5	4/124
1_Member	GO Biological Processes	GO:0061982	meiosis I cell cycle process	-2.13104	-0.129227	9133,9700,10734,147872	CCNB2,ESPL1,STAG3,KASH5	4/125
1_Member	KEGG Pathway	hsa04114	Oocyte meiosis	-2.06084	-0.102095	5528,9133,9700,10734	PPP2R5D,CCNB2,ESPL1,STAG3	4/131
2_Summary	GO Biological Processes	GO:0030036	actin cytoskeleton organization	-5.9171	-1.88536	25,2241,5339,5341,7273,9828,22808,23043,23221,57553,80115,85369,147872,342184,374666,91543,4649,23499,1778,3796	ABL1,FER,PLEC,PLEK,TTN,ARHGEF17,MRAS,TNIK,RHOBTB2,MICAL3,BAIAP2L2,STRIP1,KASH5,FMN1,WASH3P,RSAD2,MYO9A,MACF1,DYNC1H1,KIF2A	20/-
2_Member	GO Biological Processes	GO:0030036	actin cytoskeleton organization	-5.9171	-1.88536	25,2241,5339,5341,7273,9828,22808,23043,23221,57553,80115,85369,147872,342184,374666	ABL1,FER,PLEC,PLEK,TTN,ARHGEF17,MRAS,TNIK,RHOBTB2,MICAL3,BAIAP2L2,STRIP1,KASH5,FMN1,WASH3P	15/536
2_Member	GO Biological Processes	GO:0030029	actin filament-based process	-5.34661	-1.58442	25,2241,5339,5341,7273,9828,22808,23043,23221,57553,80115,85369,147872,342184,374666	ABL1,FER,PLEC,PLEK,TTN,ARHGEF17,MRAS,TNIK,RHOBTB2,MICAL3,BAIAP2L2,STRIP1,KASH5,FMN1,WASH3P	15/597
2_Member	GO Biological Processes	GO:0007015	actin filament organization	-3.66366	-0.864181	25,5339,7273,57553,80115,147872,342184,374666	ABL1,PLEC,TTN,MICAL3,BAIAP2L2,KASH5,FMN1,WASH3P	8/261
2_Member	GO Molecular Functions	GO:0043621	protein self-association	-3.04242	-0.540295	25,5339,7273,91543	ABL1,PLEC,TTN,RSAD2	4/70
2_Member	GO Molecular Functions	GO:0003779	actin binding	-2.80111	-0.422729	25,2241,4649,5339,7273,23499,57553,342184,374666	ABL1,FER,MYO9A,PLEC,TTN,MACF1,MICAL3,FMN1,WASH3P	9/438
2_Member	GO Biological Processes	GO:0097435	supramolecular fiber organization	-2.55767	-0.286833	25,1778,3796,5339,7273,57553,80115,147872,342184,374666	ABL1,DYNC1H1,KIF2A,PLEC,TTN,MICAL3,BAIAP2L2,KASH5,FMN1,WASH3P	10/569
2_Member	GO Molecular Functions	GO:0051015	actin filament binding	-2.0336	-0.0930491	25,4649,5339,7273,23499	ABL1,MYO9A,PLEC,TTN,MACF1	5/208
3_Summary	Reactome Gene Sets	R-HSA-1640170	Cell Cycle	-5.86941	-1.88536	25,208,641,1778,3796,4957,5528,5714,9133,9700,10734,10856,23133,25978,51720,84296,151246,4649,9828,10451,23221,27145,55240,80115,221458,29072,51560	ABL1,AKT2,BLM,DYNC1H1,KIF2A,ODF2,PPP2R5D,PSMD8,CCNB2,ESPL1,STAG3,RUVBL2,PHF8,CHMP2B,UIMC1,GINS4,SGO2,MYO9A,ARHGEF17,VAV3,RHOBTB2,FILIP1,STEAP3,BAIAP2L2,KIF6,SETD2,RAB6B	27/-
3_Member	Reactome Gene Sets	R-HSA-1640170	Cell Cycle	-5.86941	-1.88536	25,208,641,1778,3796,4957,5528,5714,9133,9700,10734,10856,23133,25978,51720,84296,151246	ABL1,AKT2,BLM,DYNC1H1,KIF2A,ODF2,PPP2R5D,PSMD8,CCNB2,ESPL1,STAG3,RUVBL2,PHF8,CHMP2B,UIMC1,GINS4,SGO2	17/691
3_Member	Reactome Gene Sets	R-HSA-69278	Cell Cycle, Mitotic	-4.34834	-1.26739	25,208,1778,3796,4957,5528,5714,9133,9700,23133,25978,84296,151246	ABL1,AKT2,DYNC1H1,KIF2A,ODF2,PPP2R5D,PSMD8,CCNB2,ESPL1,PHF8,CHMP2B,GINS4,SGO2	13/560
3_Member	Reactome Gene Sets	R-HSA-68882	Mitotic Anaphase	-3.96248	-1.01988	1778,3796,5528,5714,9133,9700,25978,151246	DYNC1H1,KIF2A,PPP2R5D,PSMD8,CCNB2,ESPL1,CHMP2B,SGO2	8/236
3_Member	Reactome Gene Sets	R-HSA-2555396	Mitotic Metaphase and Anaphase	-3.94981	-1.01988	1778,3796,5528,5714,9133,9700,25978,151246	DYNC1H1,KIF2A,PPP2R5D,PSMD8,CCNB2,ESPL1,CHMP2B,SGO2	8/237
3_Member	Reactome Gene Sets	R-HSA-68886	M Phase	-3.57601	-0.817983	1778,3796,4957,5528,5714,9133,9700,23133,25978,151246	DYNC1H1,KIF2A,ODF2,PPP2R5D,PSMD8,CCNB2,ESPL1,PHF8,CHMP2B,SGO2	10/417
3_Member	Reactome Gene Sets	R-HSA-69620	Cell Cycle Checkpoints	-3.32829	-0.710477	641,1778,3796,5528,5714,9133,51720,151246	BLM,DYNC1H1,KIF2A,PPP2R5D,PSMD8,CCNB2,UIMC1,SGO2	8/293
3_Member	Reactome Gene Sets	R-HSA-2500257	Resolution of Sister Chromatid Cohesion	-2.9625	-0.51516	1778,3796,5528,9133,151246	DYNC1H1,KIF2A,PPP2R5D,CCNB2,SGO2	5/126
3_Member	Reactome Gene Sets	R-HSA-2467813	Separation of Sister Chromatids	-2.92724	-0.503502	1778,3796,5528,5714,9700,151246	DYNC1H1,KIF2A,PPP2R5D,PSMD8,ESPL1,SGO2	6/191
3_Member	Reactome Gene Sets	R-HSA-194315	Signaling by Rho GTPases	-2.84651	-0.44702	25,1778,3796,4649,5528,9828,10451,23221,27145,55240,80115,151246	ABL1,DYNC1H1,KIF2A,MYO9A,PPP2R5D,ARHGEF17,VAV3,RHOBTB2,FILIP1,STEAP3,BAIAP2L2,SGO2	12/706
3_Member	Reactome Gene Sets	R-HSA-68877	Mitotic Prometaphase	-2.78168	-0.40687	1778,3796,4957,5528,9133,151246	DYNC1H1,KIF2A,ODF2,PPP2R5D,CCNB2,SGO2	6/204
3_Member	Reactome Gene Sets	R-HSA-9716542	Signaling by Rho GTPases, Miro GTPases and RHOBTB3	-2.76531	-0.394043	25,1778,3796,4649,5528,9828,10451,23221,27145,55240,80115,151246	ABL1,DYNC1H1,KIF2A,MYO9A,PPP2R5D,ARHGEF17,VAV3,RHOBTB2,FILIP1,STEAP3,BAIAP2L2,SGO2	12/722
3_Member	Reactome Gene Sets	R-HSA-141424	Amplification of signal from the kinetochores	-2.53677	-0.285115	1778,3796,5528,151246	DYNC1H1,KIF2A,PPP2R5D,SGO2	4/96
3_Member	Reactome Gene Sets	R-HSA-141444	Amplification of signal from unattached kinetochores via a MAD2 inhibitory signal	-2.53677	-0.285115	1778,3796,5528,151246	DYNC1H1,KIF2A,PPP2R5D,SGO2	4/96
3_Member	Reactome Gene Sets	R-HSA-69618	Mitotic Spindle Checkpoint	-2.28414	-0.203186	1778,3796,5528,151246	DYNC1H1,KIF2A,PPP2R5D,SGO2	4/113
3_Member	GO Molecular Functions	GO:0003774	cytoskeletal motor activity	-2.23107	-0.172789	1778,3796,4649,221458	DYNC1H1,KIF2A,MYO9A,KIF6	4/117
3_Member	Reactome Gene Sets	R-HSA-9648025	EML4 and NUDC in mitotic spindle formation	-2.23107	-0.172789	1778,3796,5528,151246	DYNC1H1,KIF2A,PPP2R5D,SGO2	4/117
3_Member	GO Biological Processes	GO:1902850	microtubule cytoskeleton organization involved in mitosis	-2.07227	-0.105255	1778,3796,9700,29072	DYNC1H1,KIF2A,ESPL1,SETD2	4/130
3_Member	Reactome Gene Sets	R-HSA-8856688	Golgi-to-ER retrograde transport	-2.03828	-0.0956249	1778,3796,51560,221458	DYNC1H1,KIF2A,RAB6B,KIF6	4/133
4_Summary	GO Biological Processes	GO:0006310	DNA recombination	-5.59155	-1.73245	641,3329,3980,5980,10856,23137,64332,80314,84296,147872,25,7150,25942,29072,51720,51742,57683,3796,7273,9700,10734,25978,151246,10451,51776,84256	BLM,HSPD1,LIG3,REV3L,RUVBL2,SMC5,NFKBIZ,EPC1,GINS4,KASH5,ABL1,TOP1,SIN3A,SETD2,UIMC1,ARID4B,ZDBF2,KIF2A,TTN,ESPL1,STAG3,CHMP2B,SGO2,VAV3,MAP3K20,FLYWCH1	26/-
4_Member	GO Biological Processes	GO:0006310	DNA recombination	-5.59155	-1.73245	641,3329,3980,5980,10856,23137,64332,80314,84296,147872	BLM,HSPD1,LIG3,REV3L,RUVBL2,SMC5,NFKBIZ,EPC1,GINS4,KASH5	10/241
4_Member	GO Biological Processes	GO:0006259	DNA metabolic process	-5.17005	-1.5671	25,641,3329,3980,5980,7150,10856,23137,25942,29072,51720,51742,57683,64332,80314,84296,147872	ABL1,BLM,HSPD1,LIG3,REV3L,TOP1,RUVBL2,SMC5,SIN3A,SETD2,UIMC1,ARID4B,ZDBF2,NFKBIZ,EPC1,GINS4,KASH5	17/780
4_Member	GO Biological Processes	GO:0000724	double-strand break repair via homologous recombination	-5.09438	-1.5671	641,3980,5980,23137,80314,84296,147872	BLM,LIG3,REV3L,SMC5,EPC1,GINS4,KASH5	7/117
4_Member	GO Biological Processes	GO:0051276	chromosome organization	-5.07402	-1.5671	25,641,3796,7150,7273,9700,10734,10856,23137,25978,84296,147872,151246	ABL1,BLM,KIF2A,TOP1,TTN,ESPL1,STAG3,RUVBL2,SMC5,CHMP2B,GINS4,KASH5,SGO2	13/477
4_Member	GO Biological Processes	GO:0000725	recombinational repair	-4.99842	-1.53857	641,3980,5980,23137,80314,84296,147872	BLM,LIG3,REV3L,SMC5,EPC1,GINS4,KASH5	7/121
4_Member	GO Cellular Components	GO:0000228	nuclear chromosome	-4.95835	-1.53857	641,7150,7273,10734,10856,25942,51742,84296,147872	BLM,TOP1,TTN,STAG3,RUVBL2,SIN3A,ARID4B,GINS4,KASH5	9/225
4_Member	GO Biological Processes	GO:0006302	double-strand break repair	-4.31618	-1.25296	641,3980,5980,23137,51720,80314,84296,147872	BLM,LIG3,REV3L,SMC5,UIMC1,EPC1,GINS4,KASH5	8/210
4_Member	GO Biological Processes	GO:0071103	DNA conformation change	-3.65325	-0.864181	25,641,7150,10856,84296	ABL1,BLM,TOP1,RUVBL2,GINS4	5/89
4_Member	GO Biological Processes	GO:0006974	DNA damage response	-3.62488	-0.844949	25,641,3980,5980,10451,10856,23137,29072,51720,51776,80314,84256,84296,147872	ABL1,BLM,LIG3,REV3L,VAV3,RUVBL2,SMC5,SETD2,UIMC1,MAP3K20,EPC1,FLYWCH1,GINS4,KASH5	14/753
4_Member	GO Biological Processes	GO:0006281	DNA repair	-3.53759	-0.817983	25,641,3980,5980,10856,23137,29072,51720,80314,84296,147872	ABL1,BLM,LIG3,REV3L,RUVBL2,SMC5,SETD2,UIMC1,EPC1,GINS4,KASH5	11/503
4_Member	GO Biological Processes	GO:0006260	DNA replication	-2.84743	-0.44702	641,3980,5980,7150,25942,84296	BLM,LIG3,REV3L,TOP1,SIN3A,GINS4	6/198
4_Member	GO Biological Processes	GO:0090329	regulation of DNA-templated DNA replication	-2.39866	-0.242128	641,3980,84296	BLM,LIG3,GINS4	3/52
4_Member	GO Biological Processes	GO:0006275	regulation of DNA replication	-2.07227	-0.105255	641,3980,10856,84296	BLM,LIG3,RUVBL2,GINS4	4/130
4_Member	GO Biological Processes	GO:0006261	DNA-templated DNA replication	-2.01612	-0.082584	641,3980,5980,84296	BLM,LIG3,REV3L,GINS4	4/135
5_Summary	GO Biological Processes	GO:0030855	epithelial cell differentiation	-5.15045	-1.5671	25,208,307,1000,2241,3398,4649,5339,9863,11005,50674,51742,64332,84283,168002,9355	ABL1,AKT2,ANXA4,CDH2,FER,ID2,MYO9A,PLEC,MAGI2,SPINK5,NEUROG3,ARID4B,NFKBIZ,TMEM79,DACT2,LHX2	16/-
5_Member	GO Biological Processes	GO:0030855	epithelial cell differentiation	-5.15045	-1.5671	25,208,307,1000,2241,3398,4649,5339,9863,11005,50674,51742,64332,84283,168002	ABL1,AKT2,ANXA4,CDH2,FER,ID2,MYO9A,PLEC,MAGI2,SPINK5,NEUROG3,ARID4B,NFKBIZ,TMEM79,DACT2	15/620
5_Member	GO Biological Processes	GO:0002064	epithelial cell development	-3.82314	-0.941755	1000,2241,5339,9863,51742,84283,168002	CDH2,FER,PLEC,MAGI2,ARID4B,TMEM79,DACT2	7/185
5_Member	GO Biological Processes	GO:0061436	establishment of skin barrier	-3.00871	-0.520424	5339,64332,84283	PLEC,NFKBIZ,TMEM79	3/32
5_Member	GO Biological Processes	GO:0034332	adherens junction organization	-2.39866	-0.242128	1000,2241,5339	CDH2,FER,PLEC	3/52
5_Member	GO Biological Processes	GO:0098773	skin epidermis development	-2.29775	-0.20394	5339,9355,64332,84283	PLEC,LHX2,NFKBIZ,TMEM79	4/112
6_Summary	GO Molecular Functions	GO:0140657	ATP-dependent activity	-4.85496	-1.47297	492,641,1778,3329,3796,4649,6597,9429,10856,10998,23137,55601,79132,221458,22808,23221,51285,51560,64225	ATP2B3,BLM,DYNC1H1,HSPD1,KIF2A,MYO9A,SMARCA4,ABCG2,RUVBL2,SLC27A5,SMC5,DDX60,DHX58,KIF6,MRAS,RHOBTB2,RASL12,RAB6B,ATL2	19/-
6_Member	GO Molecular Functions	GO:0140657	ATP-dependent activity	-4.85496	-1.47297	492,641,1778,3329,3796,4649,6597,9429,10856,10998,23137,55601,79132,221458	ATP2B3,BLM,DYNC1H1,HSPD1,KIF2A,MYO9A,SMARCA4,ABCG2,RUVBL2,SLC27A5,SMC5,DDX60,DHX58,KIF6	14/577
6_Member	GO Molecular Functions	GO:0017111	ribonucleoside triphosphate phosphatase activity	-3.88675	-0.993785	492,641,3329,3796,10856,22808,23137,23221,51285,51560,55601,64225,79132,221458	ATP2B3,BLM,HSPD1,KIF2A,RUVBL2,MRAS,SMC5,RHOBTB2,RASL12,RAB6B,DDX60,ATL2,DHX58,KIF6	14/710
6_Member	GO Molecular Functions	GO:0016462	pyrophosphatase activity	-3.52137	-0.817983	492,641,3329,3796,10856,22808,23137,23221,51285,51560,55601,64225,79132,221458	ATP2B3,BLM,HSPD1,KIF2A,RUVBL2,MRAS,SMC5,RHOBTB2,RASL12,RAB6B,DDX60,ATL2,DHX58,KIF6	14/771
6_Member	GO Molecular Functions	GO:0016817	hydrolase activity, acting on acid anhydrides	-3.51572	-0.817983	492,641,3329,3796,10856,22808,23137,23221,51285,51560,55601,64225,79132,221458	ATP2B3,BLM,HSPD1,KIF2A,RUVBL2,MRAS,SMC5,RHOBTB2,RASL12,RAB6B,DDX60,ATL2,DHX58,KIF6	14/772
6_Member	GO Molecular Functions	GO:0016818	hydrolase activity, acting on acid anhydrides, in phosphorus-containing anhydrides	-3.51572	-0.817983	492,641,3329,3796,10856,22808,23137,23221,51285,51560,55601,64225,79132,221458	ATP2B3,BLM,HSPD1,KIF2A,RUVBL2,MRAS,SMC5,RHOBTB2,RASL12,RAB6B,DDX60,ATL2,DHX58,KIF6	14/772
6_Member	GO Molecular Functions	GO:0016887	ATP hydrolysis activity	-3.23136	-0.645253	492,641,3329,3796,10856,23137,55601,79132,221458	ATP2B3,BLM,HSPD1,KIF2A,RUVBL2,SMC5,DDX60,DHX58,KIF6	9/380
7_Summary	GO Biological Processes	GO:0051301	cell division	-4.74976	-1.43994	1778,3796,3980,5339,7150,9133,9700,23137,25978,55770,57553,151246,259266,641,3398,7273,23133,29072,51720,25,4957,79801,147872,1000,5341,388552	DYNC1H1,KIF2A,LIG3,PLEC,TOP1,CCNB2,ESPL1,SMC5,CHMP2B,EXOC2,MICAL3,SGO2,ASPM,BLM,ID2,TTN,PHF8,SETD2,UIMC1,ABL1,ODF2,SHCBP1,KASH5,CDH2,PLEK,BLOC1S3	26/-
7_Member	GO Biological Processes	GO:0051301	cell division	-4.74976	-1.43994	1778,3796,3980,5339,7150,9133,9700,23137,25978,55770,57553,151246,259266	DYNC1H1,KIF2A,LIG3,PLEC,TOP1,CCNB2,ESPL1,SMC5,CHMP2B,EXOC2,MICAL3,SGO2,ASPM	13/512
7_Member	GO Biological Processes	GO:1903047	mitotic cell cycle process	-4.69699	-1.43994	641,1778,3398,3796,7273,9133,9700,23133,23137,25978,29072,51720,55770	BLM,DYNC1H1,ID2,KIF2A,TTN,CCNB2,ESPL1,PHF8,SMC5,CHMP2B,SETD2,UIMC1,EXOC2	13/518
7_Member	GO Biological Processes	GO:0000278	mitotic cell cycle	-4.58121	-1.3988	25,641,1778,3398,3796,7273,9133,9700,23133,23137,25978,29072,51720,55770	ABL1,BLM,DYNC1H1,ID2,KIF2A,TTN,CCNB2,ESPL1,PHF8,SMC5,CHMP2B,SETD2,UIMC1,EXOC2	14/611
7_Member	GO Cellular Components	GO:0005819	spindle	-2.31703	-0.211892	3796,4957,9700,25978,57553,79801,147872,259266	KIF2A,ODF2,ESPL1,CHMP2B,MICAL3,SHCBP1,KASH5,ASPM	8/425
7_Member	GO Biological Processes	GO:0061640	cytoskeleton-dependent cytokinesis	-2.3115	-0.211578	5339,9700,25978,55770	PLEC,ESPL1,CHMP2B,EXOC2	4/111
7_Member	GO Biological Processes	GO:0051640	organelle localization	-2.28725	-0.203186	1000,1778,5341,9700,25978,55770,147872,259266,388552	CDH2,DYNC1H1,PLEK,ESPL1,CHMP2B,EXOC2,KASH5,ASPM,BLOC1S3	9/524
7_Member	GO Biological Processes	GO:0000910	cytokinesis	-2.28414	-0.203186	5339,9700,25978,55770	PLEC,ESPL1,CHMP2B,EXOC2	4/113
7_Member	GO Cellular Components	GO:0030496	midbody	-2.07645	-0.105255	25978,55770,57553,79801,259266	CHMP2B,EXOC2,MICAL3,SHCBP1,ASPM	5/203
7_Member	GO Biological Processes	GO:0000070	mitotic sister chromatid segregation	-2.00519	-0.0793162	3796,7273,9700,25978	KIF2A,TTN,ESPL1,CHMP2B	4/136
8_Summary	GO Biological Processes	GO:0006351	DNA-templated transcription	-4.73167	-1.43994	2874,6597,6879,6917,22828,23133,29072,51742,55249,55718,55814,64332,80314,93649	GPS2,SMARCA4,TAF7,TCEA1,SCAF8,PHF8,SETD2,ARID4B,YY1AP1,POLR3E,BDP1,NFKBIZ,EPC1,MYOCD	14/-
8_Member	GO Biological Processes	GO:0006351	DNA-templated transcription	-4.73167	-1.43994	2874,6597,6879,6917,22828,23133,29072,51742,55249,55718,55814,64332,80314,93649	GPS2,SMARCA4,TAF7,TCEA1,SCAF8,PHF8,SETD2,ARID4B,YY1AP1,POLR3E,BDP1,NFKBIZ,EPC1,MYOCD	14/592
8_Member	GO Biological Processes	GO:0097659	nucleic acid-templated transcription	-4.71554	-1.43994	2874,6597,6879,6917,22828,23133,29072,51742,55249,55718,55814,64332,80314,93649	GPS2,SMARCA4,TAF7,TCEA1,SCAF8,PHF8,SETD2,ARID4B,YY1AP1,POLR3E,BDP1,NFKBIZ,EPC1,MYOCD	14/594
8_Member	GO Biological Processes	GO:0032774	RNA biosynthetic process	-4.62806	-1.3988	2874,6597,6879,6917,22828,23133,29072,51742,55249,55718,55814,64332,80314,93649	GPS2,SMARCA4,TAF7,TCEA1,SCAF8,PHF8,SETD2,ARID4B,YY1AP1,POLR3E,BDP1,NFKBIZ,EPC1,MYOCD	14/605
8_Member	GO Biological Processes	GO:0070897	transcription preinitiation complex assembly	-2.9303	-0.503502	6597,6879,55814,64332	SMARCA4,TAF7,BDP1,NFKBIZ	4/75
8_Member	GO Biological Processes	GO:0006352	DNA-templated transcription initiation	-2.21814	-0.164723	6597,6879,55814,64332	SMARCA4,TAF7,BDP1,NFKBIZ	4/118
8_Member	GO Biological Processes	GO:0006366	transcription by RNA polymerase II	-2.17957	-0.155114	6879,6917,22828,29072,51742,64332,93649	TAF7,TCEA1,SCAF8,SETD2,ARID4B,NFKBIZ,MYOCD	7/357
9_Summary	GO Molecular Functions	GO:0070097	delta-catenin binding	-4.58199	-1.3988	25,2241,168002,1000,5341,5675,7273,7867,8661,55770,57093,85369	ABL1,FER,DACT2,CDH2,PLEK,PSG6,TTN,MAPKAPK3,EIF3A,EXOC2,TRIM49,STRIP1	12/-
9_Member	GO Molecular Functions	GO:0070097	delta-catenin binding	-4.58199	-1.3988	25,2241,168002	ABL1,FER,DACT2	3/10
9_Member	GO Molecular Functions	GO:0019901	protein kinase binding	-2.968	-0.51516	25,1000,2241,5341,5675,7273,7867,8661,55770,57093,85369,168002	ABL1,CDH2,FER,PLEK,PSG6,TTN,MAPKAPK3,EIF3A,EXOC2,TRIM49,STRIP1,DACT2	12/683
9_Member	GO Molecular Functions	GO:0019900	kinase binding	-2.54586	-0.285115	25,1000,2241,5341,5675,7273,7867,8661,55770,57093,85369,168002	ABL1,CDH2,FER,PLEK,PSG6,TTN,MAPKAPK3,EIF3A,EXOC2,TRIM49,STRIP1,DACT2	12/768
9_Member	GO Molecular Functions	GO:0005080	protein kinase C binding	-2.49735	-0.267501	25,5341,168002	ABL1,PLEK,DACT2	3/48
10_Summary	GO Biological Processes	GO:0035306	positive regulation of dephosphorylation	-4.47195	-1.31182	5341,5510,5528,7040,9863	PLEK,PPP1R7,PPP2R5D,TGFB1,MAGI2	5/-
10_Member	GO Biological Processes	GO:0035306	positive regulation of dephosphorylation	-4.47195	-1.31182	5341,5510,5528,7040,9863	PLEK,PPP1R7,PPP2R5D,TGFB1,MAGI2	5/60
10_Member	GO Biological Processes	GO:0035307	positive regulation of protein dephosphorylation	-3.77995	-0.936014	5510,5528,7040,9863	PPP1R7,PPP2R5D,TGFB1,MAGI2	4/45
10_Member	GO Biological Processes	GO:0035303	regulation of dephosphorylation	-2.94718	-0.507295	5341,5510,5528,7040,9863	PLEK,PPP1R7,PPP2R5D,TGFB1,MAGI2	5/127
10_Member	GO Biological Processes	GO:0035304	regulation of protein dephosphorylation	-2.6922	-0.3483	5510,5528,7040,9863	PPP1R7,PPP2R5D,TGFB1,MAGI2	4/87
11_Summary	GO Molecular Functions	GO:0050839	cell adhesion molecule binding	-4.38007	-1.26739	471,1000,2241,3069,5339,5792,5902,9133,11082,23499,23650,25978,57453	ATIC,CDH2,FER,HDLBP,PLEC,PTPRF,RANBP1,CCNB2,ESM1,MACF1,TRIM29,CHMP2B,DSCAML1	13/-
11_Member	GO Molecular Functions	GO:0050839	cell adhesion molecule binding	-4.38007	-1.26739	471,1000,2241,3069,5339,5792,5902,9133,11082,23499,23650,25978,57453	ATIC,CDH2,FER,HDLBP,PLEC,PTPRF,RANBP1,CCNB2,ESM1,MACF1,TRIM29,CHMP2B,DSCAML1	13/556
11_Member	GO Molecular Functions	GO:0045296	cadherin binding	-4.36309	-1.26739	471,1000,2241,3069,5339,5902,9133,23499,23650,25978	ATIC,CDH2,FER,HDLBP,PLEC,RANBP1,CCNB2,MACF1,TRIM29,CHMP2B	10/334
12_Summary	GO Biological Processes	GO:0018193	peptidyl-amino acid modification	-4.35553	-1.26739	25,208,2241,3145,6879,7150,7867,10856,23137,29072,51776,55683,79823,80314,164714,641,3980,6597,7040,51720,84296,2874,5792,22876,23043,55814,22828	ABL1,AKT2,FER,HMBS,TAF7,TOP1,MAPKAPK3,RUVBL2,SMC5,SETD2,MAP3K20,KANSL3,CAMKMT,EPC1,TTLL8,BLM,LIG3,SMARCA4,TGFB1,UIMC1,GINS4,GPS2,PTPRF,INPP5F,TNIK,BDP1,SCAF8	27/-
12_Member	GO Biological Processes	GO:0018193	peptidyl-amino acid modification	-4.35553	-1.26739	25,208,2241,3145,6879,7150,7867,10856,23137,29072,51776,55683,79823,80314,164714	ABL1,AKT2,FER,HMBS,TAF7,TOP1,MAPKAPK3,RUVBL2,SMC5,SETD2,MAP3K20,KANSL3,CAMKMT,EPC1,TTLL8	15/726
12_Member	GO Biological Processes	GO:0051052	regulation of DNA metabolic process	-3.92929	-1.01988	25,641,3980,6597,6879,7040,10856,23137,29072,51720,80314,84296	ABL1,BLM,LIG3,SMARCA4,TAF7,TGFB1,RUVBL2,SMC5,SETD2,UIMC1,EPC1,GINS4	12/533
12_Member	GO Biological Processes	GO:0000018	regulation of DNA recombination	-3.7239	-0.896196	25,641,7040,10856,29072,80314	ABL1,BLM,TGFB1,RUVBL2,SETD2,EPC1	6/135
12_Member	GO Biological Processes	GO:0018393	internal peptidyl-lysine acetylation	-3.52122	-0.817983	6879,10856,23137,55683,80314	TAF7,RUVBL2,SMC5,KANSL3,EPC1	5/95
12_Member	GO Biological Processes	GO:0006475	internal protein amino acid acetylation	-3.47928	-0.817124	6879,10856,23137,55683,80314	TAF7,RUVBL2,SMC5,KANSL3,EPC1	5/97
12_Member	GO Biological Processes	GO:0018394	peptidyl-lysine acetylation	-3.45867	-0.810414	6879,10856,23137,55683,80314	TAF7,RUVBL2,SMC5,KANSL3,EPC1	5/98
12_Member	GO Biological Processes	GO:0006282	regulation of DNA repair	-3.42573	-0.790633	25,6597,6879,10856,29072,51720,80314	ABL1,SMARCA4,TAF7,RUVBL2,SETD2,UIMC1,EPC1	7/215
12_Member	GO Biological Processes	GO:0006473	protein acetylation	-3.05744	-0.550517	6879,10856,23137,55683,80314	TAF7,RUVBL2,SMC5,KANSL3,EPC1	5/120
12_Member	GO Biological Processes	GO:0010569	regulation of double-strand break repair via homologous recombination	-2.97412	-0.51516	25,10856,29072,80314	ABL1,RUVBL2,SETD2,EPC1	4/73
12_Member	GO Biological Processes	GO:0018205	peptidyl-lysine modification	-2.95929	-0.51516	6879,10856,23137,29072,55683,79823,80314	TAF7,RUVBL2,SMC5,SETD2,KANSL3,CAMKMT,EPC1	7/258
12_Member	GO Biological Processes	GO:0080135	regulation of cellular response to stress	-2.87765	-0.461801	25,2874,5792,6597,6879,10856,22876,23043,29072,51720,51776,80314	ABL1,GPS2,PTPRF,SMARCA4,TAF7,RUVBL2,INPP5F,TNIK,SETD2,UIMC1,MAP3K20,EPC1	12/700
12_Member	GO Biological Processes	GO:2000779	regulation of double-strand break repair	-2.84373	-0.44702	25,6597,10856,29072,80314	ABL1,SMARCA4,RUVBL2,SETD2,EPC1	5/134
12_Member	GO Biological Processes	GO:0043967	histone H4 acetylation	-2.725	-0.371047	10856,55683,80314	RUVBL2,KANSL3,EPC1	3/40
12_Member	GO Biological Processes	GO:0016573	histone acetylation	-2.6922	-0.3483	6879,10856,55683,80314	TAF7,RUVBL2,KANSL3,EPC1	4/87
12_Member	GO Cellular Components	GO:1902562	H4 histone acetyltransferase complex	-2.60552	-0.310326	10856,55683,80314	RUVBL2,KANSL3,EPC1	3/44
12_Member	GO Cellular Components	GO:0000123	histone acetyltransferase complex	-2.58667	-0.307344	6879,10856,55683,80314	TAF7,RUVBL2,KANSL3,EPC1	4/93
12_Member	GO Biological Processes	GO:0043543	protein acylation	-2.50842	-0.271114	6879,10856,23137,55683,80314	TAF7,RUVBL2,SMC5,KANSL3,EPC1	5/160
12_Member	GO Biological Processes	GO:0016570	histone modification	-2.45794	-0.25204	6879,10856,29072,51720,55683,80314	TAF7,RUVBL2,SETD2,UIMC1,KANSL3,EPC1	6/237
12_Member	GO Cellular Components	GO:0031248	protein acetyltransferase complex	-2.42695	-0.244665	6879,10856,55683,80314	TAF7,RUVBL2,KANSL3,EPC1	4/103
12_Member	GO Cellular Components	GO:1902493	acetyltransferase complex	-2.41196	-0.242128	6879,10856,55683,80314	TAF7,RUVBL2,KANSL3,EPC1	4/104
12_Member	GO Molecular Functions	GO:0140296	general transcription initiation factor binding	-2.37529	-0.236345	6879,10856,55814	TAF7,RUVBL2,BDP1	3/53
12_Member	GO Molecular Functions	GO:0001098	basal transcription machinery binding	-2.20429	-0.164723	6879,10856,22828	TAF7,RUVBL2,SCAF8	3/61
12_Member	GO Molecular Functions	GO:0001099	basal RNA polymerase II transcription machinery binding	-2.20429	-0.164723	6879,10856,22828	TAF7,RUVBL2,SCAF8	3/61
12_Member	GO Biological Processes	GO:0045739	positive regulation of DNA repair	-2.09545	-0.114289	6597,10856,51720,80314	SMARCA4,RUVBL2,UIMC1,EPC1	4/128
12_Member	GO Biological Processes	GO:0045911	positive regulation of DNA recombination	-2.03953	-0.0956249	7040,10856,80314	TGFB1,RUVBL2,EPC1	3/70
13_Summary	GO Cellular Components	GO:0000793	condensed chromosome	-4.27432	-1.23424	641,6597,7273,10734,23137,25942,25978,147872,151246,84256	BLM,SMARCA4,TTN,STAG3,SMC5,SIN3A,CHMP2B,KASH5,SGO2,FLYWCH1	10/-
13_Member	GO Cellular Components	GO:0000793	condensed chromosome	-4.27432	-1.23424	641,6597,7273,10734,23137,25942,25978,147872,151246	BLM,SMARCA4,TTN,STAG3,SMC5,SIN3A,CHMP2B,KASH5,SGO2	9/275
13_Member	GO Cellular Components	GO:0098687	chromosomal region	-3.08911	-0.567464	641,6597,10734,23137,25942,25978,84256,147872,151246	BLM,SMARCA4,STAG3,SMC5,SIN3A,CHMP2B,FLYWCH1,KASH5,SGO2	9/398
13_Member	GO Cellular Components	GO:0000775	chromosome, centromeric region	-2.98865	-0.51516	6597,10734,23137,25942,25978,84256,151246	SMARCA4,STAG3,SMC5,SIN3A,CHMP2B,FLYWCH1,SGO2	7/255
13_Member	GO Cellular Components	GO:0000794	condensed nuclear chromosome	-2.80629	-0.424303	641,7273,10734,147872	BLM,TTN,STAG3,KASH5	4/81
13_Member	GO Cellular Components	GO:0000795	synaptonemal complex	-2.725	-0.371047	641,10734,147872	BLM,STAG3,KASH5	3/40
13_Member	GO Cellular Components	GO:0099086	synaptonemal structure	-2.725	-0.371047	641,10734,147872	BLM,STAG3,KASH5	3/40
14_Summary	GO Biological Processes	GO:0010638	positive regulation of organelle organization	-4.12507	-1.11106	25,208,1778,2241,5341,9700,10856,23137,25942,57482,80115,342184,10451,23499,56996,7040,374666,5201,84079,23043,25978	ABL1,AKT2,DYNC1H1,FER,PLEK,ESPL1,RUVBL2,SMC5,SIN3A,CRACD,BAIAP2L2,FMN1,VAV3,MACF1,SLC12A9,TGFB1,WASH3P,PFDN1,ANKRD27,TNIK,CHMP2B	21/-
14_Member	GO Biological Processes	GO:0010638	positive regulation of organelle organization	-4.12507	-1.11106	25,208,1778,2241,5341,9700,10856,23137,25942,57482,80115,342184	ABL1,AKT2,DYNC1H1,FER,PLEK,ESPL1,RUVBL2,SMC5,SIN3A,CRACD,BAIAP2L2,FMN1	12/508
14_Member	GO Biological Processes	GO:0032535	regulation of cellular component size	-4.09237	-1.0936	25,2241,5341,10451,23499,25942,56996,57482,80115,342184	ABL1,FER,PLEK,VAV3,MACF1,SIN3A,SLC12A9,CRACD,BAIAP2L2,FMN1	10/360
14_Member	GO Biological Processes	GO:0051495	positive regulation of cytoskeleton organization	-3.79435	-0.936014	25,1778,2241,5341,57482,80115,342184	ABL1,DYNC1H1,FER,PLEK,CRACD,BAIAP2L2,FMN1	7/187
14_Member	GO Biological Processes	GO:0030838	positive regulation of actin filament polymerization	-3.50306	-0.817124	2241,57482,80115,342184	FER,CRACD,BAIAP2L2,FMN1	4/53
14_Member	GO Biological Processes	GO:1902905	positive regulation of supramolecular fiber organization	-3.1236	-0.580184	25,2241,5341,57482,80115,342184	ABL1,FER,PLEK,CRACD,BAIAP2L2,FMN1	6/175
14_Member	GO Biological Processes	GO:0008361	regulation of cell size	-3.09791	-0.567464	25,5341,10451,23499,25942,56996	ABL1,PLEK,VAV3,MACF1,SIN3A,SLC12A9	6/177
14_Member	GO Biological Processes	GO:0090066	regulation of anatomical structure size	-2.96793	-0.51516	25,2241,5341,10451,23499,25942,56996,57482,80115,342184	ABL1,FER,PLEK,VAV3,MACF1,SIN3A,SLC12A9,CRACD,BAIAP2L2,FMN1	10/500
14_Member	GO Biological Processes	GO:0031334	positive regulation of protein-containing complex assembly	-2.84743	-0.44702	2241,5341,7040,57482,80115,342184	FER,PLEK,TGFB1,CRACD,BAIAP2L2,FMN1	6/198
14_Member	GO Biological Processes	GO:0110053	regulation of actin filament organization	-2.80956	-0.424303	25,2241,5341,57482,80115,342184,374666	ABL1,FER,PLEK,CRACD,BAIAP2L2,FMN1,WASH3P	7/274
14_Member	GO Biological Processes	GO:0032273	positive regulation of protein polymerization	-2.60371	-0.310326	2241,57482,80115,342184	FER,CRACD,BAIAP2L2,FMN1	4/92
14_Member	GO Biological Processes	GO:1902903	regulation of supramolecular fiber organization	-2.5954	-0.310326	25,2241,5201,5341,57482,80115,342184,374666	ABL1,FER,PFDN1,PLEK,CRACD,BAIAP2L2,FMN1,WASH3P	8/382
14_Member	GO Biological Processes	GO:0008064	regulation of actin polymerization or depolymerization	-2.56767	-0.294021	2241,5341,57482,80115,342184	FER,PLEK,CRACD,BAIAP2L2,FMN1	5/155
14_Member	GO Biological Processes	GO:0030832	regulation of actin filament length	-2.53185	-0.282873	2241,5341,57482,80115,342184	FER,PLEK,CRACD,BAIAP2L2,FMN1	5/158
14_Member	GO Biological Processes	GO:0044089	positive regulation of cellular component biogenesis	-2.38467	-0.236345	25,1778,2241,5341,7040,25942,57482,80115,342184	ABL1,DYNC1H1,FER,PLEK,TGFB1,SIN3A,CRACD,BAIAP2L2,FMN1	9/506
14_Member	GO Biological Processes	GO:0043254	regulation of protein-containing complex assembly	-2.37828	-0.236345	25,2241,5341,7040,57482,80115,84079,342184	ABL1,FER,PLEK,TGFB1,CRACD,BAIAP2L2,ANKRD27,FMN1	8/415
14_Member	GO Biological Processes	GO:0031532	actin cytoskeleton reorganization	-2.32998	-0.216261	2241,5341,23043	FER,PLEK,TNIK	3/55
14_Member	GO Biological Processes	GO:0051493	regulation of cytoskeleton organization	-2.31383	-0.211578	25,1778,2241,5341,25978,57482,80115,342184,374666	ABL1,DYNC1H1,FER,PLEK,CHMP2B,CRACD,BAIAP2L2,FMN1,WASH3P	9/519
14_Member	GO Biological Processes	GO:0032956	regulation of actin cytoskeleton organization	-2.2448	-0.181372	25,2241,5341,57482,80115,342184,374666	ABL1,FER,PLEK,CRACD,BAIAP2L2,FMN1,WASH3P	7/347
14_Member	GO Biological Processes	GO:0032271	regulation of protein polymerization	-2.12963	-0.129227	25,2241,57482,80115,342184	ABL1,FER,CRACD,BAIAP2L2,FMN1	5/197
14_Member	GO Biological Processes	GO:0030833	regulation of actin filament polymerization	-2.00519	-0.0793162	2241,57482,80115,342184	FER,CRACD,BAIAP2L2,FMN1	4/136
15_Summary	GO Molecular Functions	GO:0140640	catalytic activity, acting on a nucleic acid	-3.9263	-1.01988	641,3980,5980,6597,6897,7150,8731,10667,10856,55601,55718,79132,81875,3329,23650,23137,22828	BLM,LIG3,REV3L,SMARCA4,TARS1,TOP1,RNMT,FARS2,RUVBL2,DDX60,POLR3E,DHX58,ISG20L2,HSPD1,TRIM29,SMC5,SCAF8	17/-
15_Member	GO Molecular Functions	GO:0140640	catalytic activity, acting on a nucleic acid	-3.9263	-1.01988	641,3980,5980,6597,6897,7150,8731,10667,10856,55601,55718,79132,81875	BLM,LIG3,REV3L,SMARCA4,TARS1,TOP1,RNMT,FARS2,RUVBL2,DDX60,POLR3E,DHX58,ISG20L2	13/617
15_Member	GO Molecular Functions	GO:0002039	p53 binding	-3.13873	-0.586049	641,3329,6597,23650	BLM,HSPD1,SMARCA4,TRIM29	4/66
15_Member	GO Molecular Functions	GO:0004386	helicase activity	-2.57979	-0.303314	641,6597,10856,55601,79132	BLM,SMARCA4,RUVBL2,DDX60,DHX58	5/154
15_Member	GO Molecular Functions	GO:0140097	catalytic activity, acting on DNA	-2.36225	-0.233521	641,3980,5980,6597,7150,10856	BLM,LIG3,REV3L,SMARCA4,TOP1,RUVBL2	6/248
15_Member	GO Molecular Functions	GO:0003697	single-stranded DNA binding	-2.19265	-0.161006	641,3329,7150,23137	BLM,HSPD1,TOP1,SMC5	4/120
15_Member	GO Cellular Components	GO:0016363	nuclear matrix	-2.1072	-0.12025	641,6597,10856,22828	BLM,SMARCA4,RUVBL2,SCAF8	4/127
16_Summary	CORUM	CORUM:739	SIN3-ING1b complex II	-3.92474	-1.01988	6597,25942,51742,25,7040,9719,9863,93649,168002,29072	SMARCA4,SIN3A,ARID4B,ABL1,TGFB1,ADAMTSL2,MAGI2,MYOCD,DACT2,SETD2	10/-
16_Member	CORUM	CORUM:739	SIN3-ING1b complex II	-3.92474	-1.01988	6597,25942,51742	SMARCA4,SIN3A,ARID4B	3/16
16_Member	GO Biological Processes	GO:0090092	regulation of transmembrane receptor protein serine/threonine kinase signaling pathway	-3.23265	-0.645253	25,7040,9719,9863,25942,51742,93649,168002	ABL1,TGFB1,ADAMTSL2,MAGI2,SIN3A,ARID4B,MYOCD,DACT2	8/303
16_Member	GO Biological Processes	GO:0090101	negative regulation of transmembrane receptor protein serine/threonine kinase signaling pathway	-3.17603	-0.616948	25,9719,9863,25942,51742,168002	ABL1,ADAMTSL2,MAGI2,SIN3A,ARID4B,DACT2	6/171
16_Member	GO Biological Processes	GO:0017015	regulation of transforming growth factor beta receptor signaling pathway	-2.62923	-0.317278	7040,9719,25942,51742,93649	TGFB1,ADAMTSL2,SIN3A,ARID4B,MYOCD	5/150
16_Member	GO Biological Processes	GO:1903844	regulation of cellular response to transforming growth factor beta stimulus	-2.59201	-0.309814	7040,9719,25942,51742,93649	TGFB1,ADAMTSL2,SIN3A,ARID4B,MYOCD	5/153
16_Member	GO Biological Processes	GO:1902459	positive regulation of stem cell population maintenance	-2.47186	-0.261107	6597,25942,51742	SMARCA4,SIN3A,ARID4B	3/49
16_Member	WikiPathways	WP3651	Pathways affected in adenoid cystic carcinoma	-2.12791	-0.129227	9863,29072,51742	MAGI2,SETD2,ARID4B	3/65
17_Summary	GO Biological Processes	GO:0048738	cardiac muscle tissue development	-3.78009	-0.936014	25,3398,5339,7040,7273,8131,93649,1000,9355,10451,11082,29072,55036,342184,6597,10011,4209,5341,6879,22876,91662	ABL1,ID2,PLEC,TGFB1,TTN,NPRL3,MYOCD,CDH2,LHX2,VAV3,ESM1,SETD2,CCDC40,FMN1,SMARCA4,SRA1,MEF2D,PLEK,TAF7,INPP5F,NLRP12	21/-
17_Member	GO Biological Processes	GO:0048738	cardiac muscle tissue development	-3.78009	-0.936014	25,3398,5339,7040,7273,8131,93649	ABL1,ID2,PLEC,TGFB1,TTN,NPRL3,MYOCD	7/188
17_Member	GO Biological Processes	GO:0014706	striated muscle tissue development	-3.69635	-0.878634	25,3398,5339,7040,7273,8131,93649	ABL1,ID2,PLEC,TGFB1,TTN,NPRL3,MYOCD	7/194
17_Member	GO Biological Processes	GO:0035239	tube morphogenesis	-2.98973	-0.51516	25,1000,3398,7040,8131,9355,10451,11082,29072,55036,93649,342184	ABL1,CDH2,ID2,TGFB1,NPRL3,LHX2,VAV3,ESM1,SETD2,CCDC40,MYOCD,FMN1	12/679
17_Member	GO Biological Processes	GO:0045661	regulation of myoblast differentiation	-2.97412	-0.51516	6597,7040,10011,93649	SMARCA4,TGFB1,SRA1,MYOCD	4/73
17_Member	GO Biological Processes	GO:0060537	muscle tissue development	-2.94316	-0.507295	25,3398,4209,5339,7040,7273,8131,93649	ABL1,ID2,MEF2D,PLEC,TGFB1,TTN,NPRL3,MYOCD	8/336
17_Member	GO Biological Processes	GO:0007507	heart development	-2.59606	-0.310326	25,3398,4209,5339,7040,7273,8131,29072,55036,93649	ABL1,ID2,MEF2D,PLEC,TGFB1,TTN,NPRL3,SETD2,CCDC40,MYOCD	10/562
17_Member	GO Biological Processes	GO:1902895	positive regulation of miRNA transcription	-2.39866	-0.242128	6597,7040,93649	SMARCA4,TGFB1,MYOCD	3/52
17_Member	GO Biological Processes	GO:0045936	negative regulation of phosphate metabolic process	-2.3352	-0.21665	25,5339,5341,6879,7040,22876,91662,93649	ABL1,PLEC,PLEK,TAF7,TGFB1,INPP5F,NLRP12,MYOCD	8/422
17_Member	GO Biological Processes	GO:0001933	negative regulation of protein phosphorylation	-2.33343	-0.21665	25,5339,6879,7040,22876,91662,93649	ABL1,PLEC,TAF7,TGFB1,INPP5F,NLRP12,MYOCD	7/334
17_Member	GO Biological Processes	GO:0010563	negative regulation of phosphorus metabolic process	-2.32912	-0.216261	25,5339,5341,6879,7040,22876,91662,93649	ABL1,PLEC,PLEK,TAF7,TGFB1,INPP5F,NLRP12,MYOCD	8/423
17_Member	GO Biological Processes	GO:2000630	positive regulation of miRNA metabolic process	-2.20429	-0.164723	6597,7040,93649	SMARCA4,TGFB1,MYOCD	3/61
17_Member	GO Biological Processes	GO:0042326	negative regulation of phosphorylation	-2.13536	-0.129227	25,5339,6879,7040,22876,91662,93649	ABL1,PLEC,TAF7,TGFB1,INPP5F,NLRP12,MYOCD	7/364
17_Member	GO Biological Processes	GO:1902893	regulation of miRNA transcription	-2.05663	-0.101965	6597,7040,93649	SMARCA4,TGFB1,MYOCD	3/69
17_Member	GO Biological Processes	GO:0001570	vasculogenesis	-2.00615	-0.0793162	7040,29072,93649	TGFB1,SETD2,MYOCD	3/72
18_Summary	GO Biological Processes	GO:0140352	export from cell	-3.77393	-0.936014	492,5341,9429,55240,55770,57553,84258,84283,201294,374666,388552	ATP2B3,PLEK,ABCG2,STEAP3,EXOC2,MICAL3,SYT3,TMEM79,UNC13D,WASH3P,BLOC1S3	11/-
18_Member	GO Biological Processes	GO:0140352	export from cell	-3.77393	-0.936014	492,5341,9429,55240,55770,57553,84258,84283,201294,374666,388552	ATP2B3,PLEK,ABCG2,STEAP3,EXOC2,MICAL3,SYT3,TMEM79,UNC13D,WASH3P,BLOC1S3	11/472
18_Member	GO Biological Processes	GO:0006887	exocytosis	-3.19588	-0.616948	5341,55770,57553,84258,84283,201294,374666	PLEK,EXOC2,MICAL3,SYT3,TMEM79,UNC13D,WASH3P	7/235
18_Member	GO Biological Processes	GO:0032940	secretion by cell	-2.99884	-0.5154	5341,55240,55770,57553,84258,84283,201294,374666,388552	PLEK,STEAP3,EXOC2,MICAL3,SYT3,TMEM79,UNC13D,WASH3P,BLOC1S3	9/410
18_Member	GO Biological Processes	GO:0046903	secretion	-2.27672	-0.197565	5341,55240,55770,57553,84258,84283,201294,374666,388552	PLEK,STEAP3,EXOC2,MICAL3,SYT3,TMEM79,UNC13D,WASH3P,BLOC1S3	9/526
19_Summary	GO Biological Processes	GO:0006325	chromatin organization	-3.65425	-0.864181	4302,6597,7150,9355,10856,23133,29072,51720,51742,55683,57683,64332,80314,93649,2874,10734,25942,50674	MLLT6,SMARCA4,TOP1,LHX2,RUVBL2,PHF8,SETD2,UIMC1,ARID4B,KANSL3,ZDBF2,NFKBIZ,EPC1,MYOCD,GPS2,STAG3,SIN3A,NEUROG3	18/-
19_Member	GO Biological Processes	GO:0006325	chromatin organization	-3.65425	-0.864181	4302,6597,7150,9355,10856,23133,29072,51720,51742,55683,57683,64332,80314,93649	MLLT6,SMARCA4,TOP1,LHX2,RUVBL2,PHF8,SETD2,UIMC1,ARID4B,KANSL3,ZDBF2,NFKBIZ,EPC1,MYOCD	14/748
19_Member	Reactome Gene Sets	R-HSA-3247509	Chromatin modifying enzymes	-3.54295	-0.817983	2874,6597,10856,23133,29072,51742,55683,80314	GPS2,SMARCA4,RUVBL2,PHF8,SETD2,ARID4B,KANSL3,EPC1	8/272
19_Member	Reactome Gene Sets	R-HSA-4839726	Chromatin organization	-3.54295	-0.817983	2874,6597,10856,23133,29072,51742,55683,80314	GPS2,SMARCA4,RUVBL2,PHF8,SETD2,ARID4B,KANSL3,EPC1	8/272
19_Member	GO Biological Processes	GO:0006338	chromatin remodeling	-2.35054	-0.225833	6597,7150,9355,10856,23133,29072,51742,57683,64332,80314	SMARCA4,TOP1,LHX2,RUVBL2,PHF8,SETD2,ARID4B,ZDBF2,NFKBIZ,EPC1	10/609
19_Member	GO Biological Processes	GO:0040029	epigenetic regulation of gene expression	-2.25205	-0.185338	6597,9355,51742,57683,80314	SMARCA4,LHX2,ARID4B,ZDBF2,EPC1	5/184
19_Member	GO Molecular Functions	GO:0003682	chromatin binding	-2.02163	-0.0868039	4302,6597,7150,9355,10734,10856,23133,25942,50674	MLLT6,SMARCA4,TOP1,LHX2,STAG3,RUVBL2,PHF8,SIN3A,NEUROG3	9/578
20_Summary	GO Biological Processes	GO:0002699	positive regulation of immune effector process	-3.57527	-0.817983	2241,3329,7040,55601,64332,79132,91543,201294,11005,2874,7867,25942,91662,747,25,10451,29072,55718	FER,HSPD1,TGFB1,DDX60,NFKBIZ,DHX58,RSAD2,UNC13D,SPINK5,GPS2,MAPKAPK3,SIN3A,NLRP12,DAGLA,ABL1,VAV3,SETD2,POLR3E	18/-
20_Member	GO Biological Processes	GO:0002699	positive regulation of immune effector process	-3.57527	-0.817983	2241,3329,7040,55601,64332,79132,91543,201294	FER,HSPD1,TGFB1,DDX60,NFKBIZ,DHX58,RSAD2,UNC13D	8/269
20_Member	GO Biological Processes	GO:0002697	regulation of immune effector process	-3.17503	-0.616948	2241,3329,7040,11005,55601,64332,79132,91543,201294	FER,HSPD1,TGFB1,SPINK5,DDX60,NFKBIZ,DHX58,RSAD2,UNC13D	9/387
20_Member	GO Biological Processes	GO:0045088	regulation of innate immune response	-3.17503	-0.616948	2874,3329,7040,7867,25942,55601,64332,79132,91543	GPS2,HSPD1,TGFB1,MAPKAPK3,SIN3A,DDX60,NFKBIZ,DHX58,RSAD2	9/387
20_Member	GO Biological Processes	GO:0002831	regulation of response to biotic stimulus	-3.12227	-0.580184	2874,3329,7040,7867,11005,25942,55601,64332,79132,91543	GPS2,HSPD1,TGFB1,MAPKAPK3,SPINK5,SIN3A,DDX60,NFKBIZ,DHX58,RSAD2	10/477
20_Member	GO Biological Processes	GO:0045089	positive regulation of innate immune response	-3.00846	-0.520424	3329,7867,25942,55601,64332,79132,91543	HSPD1,MAPKAPK3,SIN3A,DDX60,NFKBIZ,DHX58,RSAD2	7/253
20_Member	GO Biological Processes	GO:0002833	positive regulation of response to biotic stimulus	-2.74745	-0.383195	3329,7867,25942,55601,64332,79132,91543	HSPD1,MAPKAPK3,SIN3A,DDX60,NFKBIZ,DHX58,RSAD2	7/281
20_Member	GO Biological Processes	GO:0002224	toll-like receptor signaling pathway	-2.63424	-0.319202	3329,7867,64332	HSPD1,MAPKAPK3,NFKBIZ	3/43
20_Member	GO Biological Processes	GO:0002218	activation of innate immune response	-2.60432	-0.310326	3329,7867,25942,64332,79132	HSPD1,MAPKAPK3,SIN3A,NFKBIZ,DHX58	5/152
20_Member	GO Biological Processes	GO:0062208	positive regulation of pattern recognition receptor signaling pathway	-2.55015	-0.285115	55601,79132,91543	DDX60,DHX58,RSAD2	3/46
20_Member	GO Biological Processes	GO:0031349	positive regulation of defense response	-2.49371	-0.267501	3329,7867,25942,55601,64332,79132,91543,91662	HSPD1,MAPKAPK3,SIN3A,DDX60,NFKBIZ,DHX58,RSAD2,NLRP12	8/397
20_Member	GO Biological Processes	GO:0031347	regulation of defense response	-2.43901	-0.245009	747,2874,3329,7040,7867,11005,25942,55601,64332,79132,91543,91662	DAGLA,GPS2,HSPD1,TGFB1,MAPKAPK3,SPINK5,SIN3A,DDX60,NFKBIZ,DHX58,RSAD2,NLRP12	12/792
20_Member	GO Biological Processes	GO:0002221	pattern recognition receptor signaling pathway	-2.36798	-0.235192	3329,7867,64332,79132	HSPD1,MAPKAPK3,NFKBIZ,DHX58	4/107
20_Member	GO Biological Processes	GO:0002764	immune response-regulating signaling pathway	-2.34747	-0.224754	25,2241,3329,7867,10451,64332,79132	ABL1,FER,HSPD1,MAPKAPK3,VAV3,NFKBIZ,DHX58	7/332
20_Member	GO Biological Processes	GO:0062207	regulation of pattern recognition receptor signaling pathway	-2.3254	-0.214479	2874,55601,79132,91543	GPS2,DDX60,DHX58,RSAD2	4/110
20_Member	GO Biological Processes	GO:0050778	positive regulation of immune response	-2.28741	-0.203186	25,3329,7040,7867,10451,25942,55601,64332,79132,91543	ABL1,HSPD1,TGFB1,MAPKAPK3,VAV3,SIN3A,DDX60,NFKBIZ,DHX58,RSAD2	10/622
20_Member	GO Biological Processes	GO:0039531	regulation of viral-induced cytoplasmic pattern recognition receptor signaling pathway	-2.28646	-0.203186	55601,79132,91543	DDX60,DHX58,RSAD2	3/57
20_Member	GO Biological Processes	GO:0032103	positive regulation of response to external stimulus	-2.2147	-0.164723	3329,7040,7867,25942,55601,64332,79132,91543,91662	HSPD1,TGFB1,MAPKAPK3,SIN3A,DDX60,NFKBIZ,DHX58,RSAD2,NLRP12	9/538
20_Member	GO Biological Processes	GO:0051607	defense response to virus	-2.19367	-0.161006	29072,55601,55718,79132,91543,201294	SETD2,DDX60,POLR3E,DHX58,RSAD2,UNC13D	6/269
20_Member	GO Biological Processes	GO:0140546	defense response to symbiont	-2.18606	-0.156481	29072,55601,55718,79132,91543,201294	SETD2,DDX60,POLR3E,DHX58,RSAD2,UNC13D	6/270
20_Member	GO Biological Processes	GO:0002253	activation of immune response	-2.12293	-0.127149	25,3329,7867,10451,25942,64332,79132	ABL1,HSPD1,MAPKAPK3,VAV3,SIN3A,NFKBIZ,DHX58	7/366
20_Member	GO Biological Processes	GO:0002758	innate immune response-activating signaling pathway	-2.09545	-0.114289	3329,7867,64332,79132	HSPD1,MAPKAPK3,NFKBIZ,DHX58	4/128
20_Member	GO Biological Processes	GO:0032481	positive regulation of type I interferon production	-2.03953	-0.0956249	3329,29072,79132	HSPD1,SETD2,DHX58	3/70
20_Member	GO Molecular Functions	GO:0003725	double-stranded RNA binding	-2.00615	-0.0793162	3329,55601,79132	HSPD1,DDX60,DHX58	3/72

## Sheet: MG132-protein-metascape
GroupID	Category	Term	Description	LogP	Log(q-value)	Genes	Symbols	InTerm_InList
1_Summary	GO Biological Processes	GO:0140694	non-membrane-bounded organelle assembly	-11.814	-7.35286	1063,1778,3688,3796,4605,4703,5339,5591,5629,6175,6790,7273,9855,22995,23122,29127,54627,64105,80206,84665,147872,159989,163786,203228,259266,288,701,891,1021,2103,6118,6242,7272,8065,8318,8883,9700,9833,10112,10579,23175,51149,51720,11190,91754,7153,29893,57082,84643,22911,54768,55857,94137,117178,285331,399693,8239,51776,5902,5971,6919,10575,23352,60494,79598,80746,84260,8607,81928,5719,5824,56…	CENPF,DYNC1H1,ITGB1,KIF2A,MYBL2,NEB,PLEC,PRKDC,PROX1,RPLP0,AURKA,TTN,FARP2,CEP152,CLASP2,RACGAP1,MAP10,CENPK,FHOD3,MYPN,KASH5,DEUP1,SASS6,C9orf72,ASPM,ANK3,BUB1B,CCNB1,CDK6,ESRRB,RPA2,RTKN,TTK,CUL5,CDC45,NAE1,ESPL1,MELK,KIF20A,TACC2,LPIN1,MRNIP,UIMC1,CEP250,NEK9,TOP2A,PSMC3IP,KNL1,KIF2B,WDR47,HYDIN,KIZ,RP1L1,SSX2IP,CCDC66,CCDC187,USP9X,MAP3K20,RANBP1,RELB,TCEA2,CCT4,UBR4,CCDC81,CEP97,TSEN2,TCHP,R…	77/-
1_Member	GO Biological Processes	GO:0140694	non-membrane-bounded organelle assembly	-11.814	-7.35286	1063,1778,3688,3796,4605,4703,5339,5591,5629,6175,6790,7273,9855,22995,23122,29127,54627,64105,80206,84665,147872,159989,163786,203228,259266	CENPF,DYNC1H1,ITGB1,KIF2A,MYBL2,NEB,PLEC,PRKDC,PROX1,RPLP0,AURKA,TTN,FARP2,CEP152,CLASP2,RACGAP1,MAP10,CENPK,FHOD3,MYPN,KASH5,DEUP1,SASS6,C9orf72,ASPM	25/324
1_Member	GO Biological Processes	GO:1903047	mitotic cell cycle process	-10.8746	-6.71443	288,701,891,1021,1063,1778,2103,3688,3796,4605,5591,6118,6242,6790,7272,7273,8065,8318,8883,9700,9833,10112,10579,23122,23175,29127,51149,51720,54627,64105	ANK3,BUB1B,CCNB1,CDK6,CENPF,DYNC1H1,ESRRB,ITGB1,KIF2A,MYBL2,PRKDC,RPA2,RTKN,AURKA,TTK,TTN,CUL5,CDC45,NAE1,ESPL1,MELK,KIF20A,TACC2,CLASP2,LPIN1,RACGAP1,MRNIP,UIMC1,MAP10,CENPK	30/518
1_Member	GO Biological Processes	GO:0000278	mitotic cell cycle	-10.432	-6.46632	288,701,891,1021,1063,1778,2103,3688,3796,4605,5591,6118,6242,6790,7272,7273,8065,8318,8883,9700,9833,10112,10579,11190,23122,23175,29127,51149,51720,54627,64105,91754	ANK3,BUB1B,CCNB1,CDK6,CENPF,DYNC1H1,ESRRB,ITGB1,KIF2A,MYBL2,PRKDC,RPA2,RTKN,AURKA,TTK,TTN,CUL5,CDC45,NAE1,ESPL1,MELK,KIF20A,TACC2,CEP250,CLASP2,LPIN1,RACGAP1,MRNIP,UIMC1,MAP10,CENPK,NEK9	32/611
1_Member	GO Biological Processes	GO:0098813	nuclear chromosome segregation	-8.61811	-5.06003	891,1063,3796,4605,6790,7153,7272,7273,9700,23122,29127,29893,54627,57082,64105,84643,147872,259266	CCNB1,CENPF,KIF2A,MYBL2,AURKA,TOP2A,TTK,TTN,ESPL1,CLASP2,RACGAP1,PSMC3IP,MAP10,KNL1,CENPK,KIF2B,KASH5,ASPM	18/235
1_Member	GO Biological Processes	GO:0000226	microtubule cytoskeleton organization	-8.24775	-4.74083	891,1778,3688,3796,4605,6790,7272,9700,10112,10579,11190,22911,22995,23122,29127,54627,54768,55857,84643,94137,117178,147872,159989,163786,259266,285331,399693	CCNB1,DYNC1H1,ITGB1,KIF2A,MYBL2,AURKA,TTK,ESPL1,KIF20A,TACC2,CEP250,WDR47,CEP152,CLASP2,RACGAP1,MAP10,HYDIN,KIZ,KIF2B,RP1L1,SSX2IP,KASH5,DEUP1,SASS6,ASPM,CCDC66,CCDC187	27/552
1_Member	GO Biological Processes	GO:0007059	chromosome segregation	-7.71836	-4.29858	891,1063,3796,4605,6790,7153,7272,7273,8239,9700,23122,29127,29893,51776,54627,57082,64105,84643,147872,259266	CCNB1,CENPF,KIF2A,MYBL2,AURKA,TOP2A,TTK,TTN,USP9X,ESPL1,CLASP2,RACGAP1,PSMC3IP,MAP3K20,MAP10,KNL1,CENPK,KIF2B,KASH5,ASPM	20/332
1_Member	GO Biological Processes	GO:0007051	spindle organization	-7.49382	-4.15108	891,1778,3796,4605,6790,7272,9700,10579,23122,29127,54627,55857,147872,259266	CCNB1,DYNC1H1,KIF2A,MYBL2,AURKA,TTK,ESPL1,TACC2,CLASP2,RACGAP1,MAP10,KIZ,KASH5,ASPM	14/162
1_Member	GO Cellular Components	GO:0005813	centrosome	-7.46612	-4.15108	891,1021,1063,1778,3796,5902,5971,6790,6919,8318,9700,10575,11190,22995,23352,54627,55857,60494,79598,80746,84260,84643,91754,117178,163786,259266,285331,399693	CCNB1,CDK6,CENPF,DYNC1H1,KIF2A,RANBP1,RELB,AURKA,TCEA2,CDC45,ESPL1,CCT4,CEP250,CEP152,UBR4,MAP10,KIZ,CCDC81,CEP97,TSEN2,TCHP,KIF2B,NEK9,SSX2IP,SASS6,ASPM,CCDC66,CCDC187	28/642
1_Member	GO Biological Processes	GO:0051301	cell division	-7.04902	-3.79197	288,701,891,1021,1063,1778,2103,3796,5339,6242,6790,7153,8239,8607,9700,10112,23122,29127,54627,57082,81928,84643,91754,259266	ANK3,BUB1B,CCNB1,CDK6,CENPF,DYNC1H1,ESRRB,KIF2A,PLEC,RTKN,AURKA,TOP2A,USP9X,RUVBL1,ESPL1,KIF20A,CLASP2,RACGAP1,MAP10,KNL1,CABLES2,KIF2B,NEK9,ASPM	24/512
1_Member	GO Biological Processes	GO:1902850	microtubule cytoskeleton organization involved in mitosis	-6.8224	-3.68345	891,1778,3688,3796,4605,6790,7272,9700,10579,23122,29127,54627	CCNB1,DYNC1H1,ITGB1,KIF2A,MYBL2,AURKA,TTK,ESPL1,TACC2,CLASP2,RACGAP1,MAP10	12/130
1_Member	GO Biological Processes	GO:0007052	mitotic spindle organization	-6.31364	-3.28384	891,1778,3796,4605,6790,7272,10579,23122,29127,54627	CCNB1,DYNC1H1,KIF2A,MYBL2,AURKA,TTK,TACC2,CLASP2,RACGAP1,MAP10	10/95
1_Member	GO Biological Processes	GO:0048285	organelle fission	-6.29233	-3.27832	891,3796,4605,5719,5824,6790,7153,7272,7273,9700,23122,29127,29893,54627,56181,64105,147872,259266	CCNB1,KIF2A,MYBL2,PSMD13,PEX19,AURKA,TOP2A,TTK,TTN,ESPL1,CLASP2,RACGAP1,PSMC3IP,MAP10,MTFR1L,CENPK,KASH5,ASPM	18/334
1_Member	GO Biological Processes	GO:0051276	chromosome organization	-5.80467	-2.84865	701,891,1063,3320,3796,4605,5591,6118,7153,7273,8318,8607,8971,9700,23122,27127,29127,29893,54627,64105,147872	BUB1B,CCNB1,CENPF,HSP90AA1,KIF2A,MYBL2,PRKDC,RPA2,TOP2A,TTN,CDC45,RUVBL1,H1-10,ESPL1,CLASP2,SMC1B,RACGAP1,PSMC3IP,MAP10,CENPK,KASH5	21/477
1_Member	GO Biological Processes	GO:0000280	nuclear division	-5.45437	-2.59526	891,3796,4605,5719,6790,7153,7272,7273,9700,23122,29127,29893,54627,64105,147872,259266	CCNB1,KIF2A,MYBL2,PSMD13,AURKA,TOP2A,TTK,TTN,ESPL1,CLASP2,RACGAP1,PSMC3IP,MAP10,CENPK,KASH5,ASPM	16/308
1_Member	GO Biological Processes	GO:0000819	sister chromatid segregation	-4.78519	-2.03198	891,3796,4605,7153,7273,9700,23122,29127,54627,64105	CCNB1,KIF2A,MYBL2,TOP2A,TTN,ESPL1,CLASP2,RACGAP1,MAP10,CENPK	10/140
1_Member	GO Biological Processes	GO:0051225	spindle assembly	-4.31911	-1.71527	3796,4605,6790,23122,29127,54627,147872,259266	KIF2A,MYBL2,AURKA,CLASP2,RACGAP1,MAP10,KASH5,ASPM	8/99
1_Member	GO Biological Processes	GO:0140014	mitotic nuclear division	-4.2415	-1.66115	891,3796,4605,6790,7273,9700,23122,29127,54627,64105	CCNB1,KIF2A,MYBL2,AURKA,TTN,ESPL1,CLASP2,RACGAP1,MAP10,CENPK	10/162
1_Member	GO Biological Processes	GO:0000070	mitotic sister chromatid segregation	-4.10456	-1.56247	891,3796,4605,7273,9700,23122,29127,54627,64105	CCNB1,KIF2A,MYBL2,TTN,ESPL1,CLASP2,RACGAP1,MAP10,CENPK	9/136
1_Member	GO Biological Processes	GO:0090307	mitotic spindle assembly	-3.35596	-1.08232	3796,4605,23122,29127,54627	KIF2A,MYBL2,CLASP2,RACGAP1,MAP10	5/49
1_Member	GO Cellular Components	GO:0005819	spindle	-2.81037	-0.749009	701,891,1063,3796,6790,7272,9700,10112,23122,29127,54627,84643,147872,259266	BUB1B,CCNB1,CENPF,KIF2A,AURKA,TTK,ESPL1,KIF20A,CLASP2,RACGAP1,MAP10,KIF2B,KASH5,ASPM	14/425
1_Member	GO Biological Processes	GO:0090068	positive regulation of cell cycle process	-2.61474	-0.615966	891,1778,5902,6790,6868,9700,29127,51776,54627,163786	CCNB1,DYNC1H1,RANBP1,AURKA,ADAM17,ESPL1,RACGAP1,MAP3K20,MAP10,SASS6	10/261
1_Member	GO Biological Processes	GO:0045787	positive regulation of cell cycle	-2.5957	-0.608743	891,1778,5017,5629,5902,6790,6868,9700,29127,51776,54627,163786	CCNB1,DYNC1H1,OVOL1,PROX1,RANBP1,AURKA,ADAM17,ESPL1,RACGAP1,MAP3K20,MAP10,SASS6	12/353
1_Member	GO Cellular Components	GO:0000922	spindle pole	-2.11622	-0.367698	891,1063,3796,6790,54627,147872,259266	CCNB1,CENPF,KIF2A,AURKA,MAP10,KASH5,ASPM	7/172
2_Summary	Reactome Gene Sets	R-HSA-1640170	Cell Cycle	-10.3254	-6.46632	208,701,891,1021,1063,1778,3320,3796,4001,4605,5691,5707,5714,5719,6118,6790,7153,8318,8607,8924,9700,10112,11190,22995,23122,23175,27127,29893,51720,57082,64105,84643,91754,200014,3688,81624,114793,2103,7272,7273,147872,3831,6242,10109,84256,5591	AKT2,BUB1B,CCNB1,CDK6,CENPF,DYNC1H1,HSP90AA1,KIF2A,LMNB1,MYBL2,PSMB3,PSMD1,PSMD8,PSMD13,RPA2,AURKA,TOP2A,CDC45,RUVBL1,HERC2,ESPL1,KIF20A,CEP250,CEP152,CLASP2,LPIN1,SMC1B,PSMC3IP,UIMC1,KNL1,CENPK,KIF2B,NEK9,CC2D1B,ITGB1,DIAPH3,FMNL2,ESRRB,TTK,TTN,KASH5,KLC1,RTKN,ARPC2,FLYWCH1,PRKDC	46/-
2_Member	Reactome Gene Sets	R-HSA-1640170	Cell Cycle	-10.3254	-6.46632	208,701,891,1021,1063,1778,3320,3796,4001,4605,5691,5707,5714,5719,6118,6790,7153,8318,8607,8924,9700,10112,11190,22995,23122,23175,27127,29893,51720,57082,64105,84643,91754,200014	AKT2,BUB1B,CCNB1,CDK6,CENPF,DYNC1H1,HSP90AA1,KIF2A,LMNB1,MYBL2,PSMB3,PSMD1,PSMD8,PSMD13,RPA2,AURKA,TOP2A,CDC45,RUVBL1,HERC2,ESPL1,KIF20A,CEP250,CEP152,CLASP2,LPIN1,SMC1B,PSMC3IP,UIMC1,KNL1,CENPK,KIF2B,NEK9,CC2D1B	34/691
2_Member	Reactome Gene Sets	R-HSA-69278	Cell Cycle, Mitotic	-9.38672	-5.62452	208,701,891,1021,1063,1778,3320,3796,4001,4605,5691,5707,5714,5719,6118,6790,7153,8318,9700,10112,11190,22995,23122,23175,57082,64105,84643,91754,200014	AKT2,BUB1B,CCNB1,CDK6,CENPF,DYNC1H1,HSP90AA1,KIF2A,LMNB1,MYBL2,PSMB3,PSMD1,PSMD8,PSMD13,RPA2,AURKA,TOP2A,CDC45,ESPL1,KIF20A,CEP250,CEP152,CLASP2,LPIN1,KNL1,CENPK,KIF2B,NEK9,CC2D1B	29/560
2_Member	Reactome Gene Sets	R-HSA-68886	M Phase	-7.3964	-4.11133	701,891,1063,1778,3320,3796,4001,5691,5707,5714,5719,9700,10112,11190,22995,23122,23175,57082,64105,84643,91754,200014	BUB1B,CCNB1,CENPF,DYNC1H1,HSP90AA1,KIF2A,LMNB1,PSMB3,PSMD1,PSMD8,PSMD13,ESPL1,KIF20A,CEP250,CEP152,CLASP2,LPIN1,KNL1,CENPK,KIF2B,NEK9,CC2D1B	22/417
2_Member	Reactome Gene Sets	R-HSA-68882	Mitotic Anaphase	-6.98886	-3.75814	701,891,1063,1778,3796,4001,5691,5707,5714,5719,9700,23122,57082,64105,84643,200014	BUB1B,CCNB1,CENPF,DYNC1H1,KIF2A,LMNB1,PSMB3,PSMD1,PSMD8,PSMD13,ESPL1,CLASP2,KNL1,CENPK,KIF2B,CC2D1B	16/236
2_Member	Reactome Gene Sets	R-HSA-2555396	Mitotic Metaphase and Anaphase	-6.96364	-3.75775	701,891,1063,1778,3796,4001,5691,5707,5714,5719,9700,23122,57082,64105,84643,200014	BUB1B,CCNB1,CENPF,DYNC1H1,KIF2A,LMNB1,PSMB3,PSMD1,PSMD8,PSMD13,ESPL1,CLASP2,KNL1,CENPK,KIF2B,CC2D1B	16/237
2_Member	Reactome Gene Sets	R-HSA-69620	Cell Cycle Checkpoints	-6.42027	-3.37407	701,891,1063,1778,3796,5691,5707,5714,5719,6118,8318,8924,23122,51720,57082,64105,84643	BUB1B,CCNB1,CENPF,DYNC1H1,KIF2A,PSMB3,PSMD1,PSMD8,PSMD13,RPA2,CDC45,HERC2,CLASP2,UIMC1,KNL1,CENPK,KIF2B	17/293
2_Member	Reactome Gene Sets	R-HSA-2467813	Separation of Sister Chromatids	-5.8098	-2.84865	701,1063,1778,3796,5691,5707,5714,5719,9700,23122,57082,64105,84643	BUB1B,CENPF,DYNC1H1,KIF2A,PSMB3,PSMD1,PSMD8,PSMD13,ESPL1,CLASP2,KNL1,CENPK,KIF2B	13/191
2_Member	Reactome Gene Sets	R-HSA-5663220	RHO GTPases Activate Formins	-5.60714	-2.69004	701,1063,1778,3688,3796,23122,57082,64105,81624,84643,114793	BUB1B,CENPF,DYNC1H1,ITGB1,KIF2A,CLASP2,KNL1,CENPK,DIAPH3,KIF2B,FMNL2	11/140
2_Member	Reactome Gene Sets	R-HSA-68877	Mitotic Prometaphase	-5.49239	-2.62229	701,891,1063,1778,3320,3796,11190,22995,23122,57082,64105,84643,91754	BUB1B,CCNB1,CENPF,DYNC1H1,HSP90AA1,KIF2A,CEP250,CEP152,CLASP2,KNL1,CENPK,KIF2B,NEK9	13/204
2_Member	GO Cellular Components	GO:0000793	condensed chromosome	-5.40615	-2.55776	701,891,1063,2103,6790,7153,7272,7273,23122,27127,29893,57082,64105,84643,147872	BUB1B,CCNB1,CENPF,ESRRB,AURKA,TOP2A,TTK,TTN,CLASP2,SMC1B,PSMC3IP,KNL1,CENPK,KIF2B,KASH5	15/275
2_Member	Reactome Gene Sets	R-HSA-9648025	EML4 and NUDC in mitotic spindle formation	-4.61806	-1.92775	701,1063,1778,3796,23122,57082,64105,84643,91754	BUB1B,CENPF,DYNC1H1,KIF2A,CLASP2,KNL1,CENPK,KIF2B,NEK9	9/117
2_Member	Reactome Gene Sets	R-HSA-141424	Amplification of signal from the kinetochores	-4.41533	-1.7535	701,1063,1778,3796,23122,57082,64105,84643	BUB1B,CENPF,DYNC1H1,KIF2A,CLASP2,KNL1,CENPK,KIF2B	8/96
2_Member	Reactome Gene Sets	R-HSA-141444	Amplification of signal from unattached kinetochores via a MAD2 inhibitory signal	-4.41533	-1.7535	701,1063,1778,3796,23122,57082,64105,84643	BUB1B,CENPF,DYNC1H1,KIF2A,CLASP2,KNL1,CENPK,KIF2B	8/96
2_Member	Reactome Gene Sets	R-HSA-2500257	Resolution of Sister Chromatid Cohesion	-4.36305	-1.73439	701,891,1063,1778,3796,23122,57082,64105,84643	BUB1B,CCNB1,CENPF,DYNC1H1,KIF2A,CLASP2,KNL1,CENPK,KIF2B	9/126
2_Member	Reactome Gene Sets	R-HSA-195258	RHO GTPase Effectors	-3.95029	-1.43852	701,1063,1778,3688,3796,3831,6242,10109,23122,57082,64105,81624,84643,114793	BUB1B,CENPF,DYNC1H1,ITGB1,KIF2A,KLC1,RTKN,ARPC2,CLASP2,KNL1,CENPK,DIAPH3,KIF2B,FMNL2	14/326
2_Member	Reactome Gene Sets	R-HSA-69618	Mitotic Spindle Checkpoint	-3.91227	-1.42423	701,1063,1778,3796,23122,57082,64105,84643	BUB1B,CENPF,DYNC1H1,KIF2A,CLASP2,KNL1,CENPK,KIF2B	8/113
2_Member	GO Cellular Components	GO:0000775	chromosome, centromeric region	-3.83069	-1.37384	701,891,1063,6790,7153,7272,23122,27127,57082,64105,84256,84643	BUB1B,CCNB1,CENPF,AURKA,TOP2A,TTK,CLASP2,SMC1B,KNL1,CENPK,FLYWCH1,KIF2B	12/255
2_Member	GO Cellular Components	GO:0098687	chromosomal region	-3.57253	-1.2272	701,891,1063,5591,6118,6790,7153,7272,23122,27127,57082,64105,84256,84643,147872	BUB1B,CCNB1,CENPF,PRKDC,RPA2,AURKA,TOP2A,TTK,CLASP2,SMC1B,KNL1,CENPK,FLYWCH1,KIF2B,KASH5	15/398
2_Member	GO Cellular Components	GO:0000776	kinetochore	-3.47144	-1.15946	701,891,1063,6790,7272,23122,57082,64105,84643	BUB1B,CCNB1,CENPF,AURKA,TTK,CLASP2,KNL1,CENPK,KIF2B	9/165
2_Member	GO Cellular Components	GO:0000779	condensed chromosome, centromeric region	-3.2673	-1.0336	701,891,1063,6790,7272,23122,57082,64105,84643	BUB1B,CCNB1,CENPF,AURKA,TTK,CLASP2,KNL1,CENPK,KIF2B	9/176
3_Summary	Reactome Gene Sets	R-HSA-194315	Signaling by Rho GTPases	-8.86367	-5.18066	667,701,1063,1778,2802,3320,3688,3796,3831,4001,6242,8239,9732,9855,10109,11180,23122,29127,51133,55852,56924,57082,64105,79598,79869,80115,81624,81704,84643,114793,139818,399693	DST,BUB1B,CENPF,DYNC1H1,GOLGA3,HSP90AA1,ITGB1,KIF2A,KLC1,LMNB1,RTKN,USP9X,DOCK4,FARP2,ARPC2,WDR6,CLASP2,RACGAP1,KCTD3,TEX2,PAK6,KNL1,CENPK,CEP97,CPSF7,BAIAP2L2,DIAPH3,DOCK8,KIF2B,FMNL2,DOCK11,CCDC187	32/-
3_Member	Reactome Gene Sets	R-HSA-194315	Signaling by Rho GTPases	-8.86367	-5.18066	667,701,1063,1778,2802,3320,3688,3796,3831,4001,6242,8239,9732,9855,10109,11180,23122,29127,51133,55852,56924,57082,64105,79598,79869,80115,81624,81704,84643,114793,139818,399693	DST,BUB1B,CENPF,DYNC1H1,GOLGA3,HSP90AA1,ITGB1,KIF2A,KLC1,LMNB1,RTKN,USP9X,DOCK4,FARP2,ARPC2,WDR6,CLASP2,RACGAP1,KCTD3,TEX2,PAK6,KNL1,CENPK,CEP97,CPSF7,BAIAP2L2,DIAPH3,DOCK8,KIF2B,FMNL2,DOCK11,CCDC187	32/706
3_Member	Reactome Gene Sets	R-HSA-9716542	Signaling by Rho GTPases, Miro GTPases and RHOBTB3	-8.6277	-5.06003	667,701,1063,1778,2802,3320,3688,3796,3831,4001,6242,8239,9732,9855,10109,11180,23122,29127,51133,55852,56924,57082,64105,79598,79869,80115,81624,81704,84643,114793,139818,399693	DST,BUB1B,CENPF,DYNC1H1,GOLGA3,HSP90AA1,ITGB1,KIF2A,KLC1,LMNB1,RTKN,USP9X,DOCK4,FARP2,ARPC2,WDR6,CLASP2,RACGAP1,KCTD3,TEX2,PAK6,KNL1,CENPK,CEP97,CPSF7,BAIAP2L2,DIAPH3,DOCK8,KIF2B,FMNL2,DOCK11,CCDC187	32/722
3_Member	Reactome Gene Sets	R-HSA-9012999	RHO GTPase cycle	-6.8375	-3.68345	667,2802,3320,3688,4001,6242,8239,9732,9855,11180,29127,51133,55852,56924,79598,79869,80115,81624,81704,114793,139818,399693	DST,GOLGA3,HSP90AA1,ITGB1,LMNB1,RTKN,USP9X,DOCK4,FARP2,WDR6,RACGAP1,KCTD3,TEX2,PAK6,CEP97,CPSF7,BAIAP2L2,DIAPH3,DOCK8,FMNL2,DOCK11,CCDC187	22/449
3_Member	Reactome Gene Sets	R-HSA-9013149	RAC1 GTPase cycle	-2.50697	-0.566943	3688,9732,9855,29127,56924,81624,81704,139818	ITGB1,DOCK4,FARP2,RACGAP1,PAK6,DIAPH3,DOCK8,DOCK11	8/185
3_Member	Reactome Gene Sets	R-HSA-9013148	CDC42 GTPase cycle	-2.3576	-0.484464	29127,51133,56924,81624,81704,114793,139818	RACGAP1,KCTD3,PAK6,DIAPH3,DOCK8,FMNL2,DOCK11	7/155
3_Member	Reactome Gene Sets	R-HSA-9013405	RHOD GTPase cycle	-2.26609	-0.449763	4001,29127,56924,81624	LMNB1,RACGAP1,PAK6,DIAPH3	4/54
4_Summary	GO Molecular Functions	GO:0050839	cell adhesion molecule binding	-8.1817	-4.72053	226,288,471,667,1000,1001,1307,2194,2802,3688,3898,5339,5902,6868,8496,8607,8971,9746,10562,23499,26130,53616,56924,57453,81624,84665,114793	ALDOA,ANK3,ATIC,DST,CDH2,CDH3,COL16A1,FASN,GOLGA3,ITGB1,LAD1,PLEC,RANBP1,ADAM17,PPFIBP1,RUVBL1,H1-10,CLSTN3,OLFM4,MACF1,GAPVD1,ADAM22,PAK6,DSCAML1,DIAPH3,MYPN,FMNL2	27/-
4_Member	GO Molecular Functions	GO:0050839	cell adhesion molecule binding	-8.1817	-4.72053	226,288,471,667,1000,1001,1307,2194,2802,3688,3898,5339,5902,6868,8496,8607,8971,9746,10562,23499,26130,53616,56924,57453,81624,84665,114793	ALDOA,ANK3,ATIC,DST,CDH2,CDH3,COL16A1,FASN,GOLGA3,ITGB1,LAD1,PLEC,RANBP1,ADAM17,PPFIBP1,RUVBL1,H1-10,CLSTN3,OLFM4,MACF1,GAPVD1,ADAM22,PAK6,DSCAML1,DIAPH3,MYPN,FMNL2	27/556
4_Member	GO Molecular Functions	GO:0045296	cadherin binding	-7.67496	-4.29298	226,288,471,1000,1001,2194,2802,3688,3898,5339,5902,8496,8607,8971,10562,23499,26130,56924,81624,114793	ALDOA,ANK3,ATIC,CDH2,CDH3,FASN,GOLGA3,ITGB1,LAD1,PLEC,RANBP1,PPFIBP1,RUVBL1,H1-10,OLFM4,MACF1,GAPVD1,PAK6,DIAPH3,FMNL2	20/334
5_Summary	GO Molecular Functions	GO:0016301	kinase activity	-6.92476	-3.74234	208,701,1021,2064,3482,5286,5591,5610,5631,6352,6790,7272,7273,7867,8536,8621,9061,9833,22928,23049,51776,56924,84254,91754,140803,160851,200576,260425,284656,891,2915,7097,50937,79625,639,5987,8295,8607,23409,26276,55683,57691,339287	AKT2,BUB1B,CDK6,ERBB2,IGF2R,PIK3C2A,PRKDC,EIF2AK2,PRPS1,CCL5,AURKA,TTK,TTN,MAPKAPK3,CAMK1,CDK13,PAPSS1,MELK,SEPHS2,SMG1,MAP3K20,PAK6,CAMKK1,NEK9,TRPM6,DGKH,PIKFYVE,MAGI3,EPHA10,CCNB1,GRM5,TLR2,CDON,NDNF,PRDM1,TRIM27,TRRAP,RUVBL1,SIRT4,VPS33B,KANSL3,KIAA1586,MSL1	43/-
5_Member	GO Molecular Functions	GO:0016301	kinase activity	-6.92476	-3.74234	208,701,1021,2064,3482,5286,5591,5610,5631,6352,6790,7272,7273,7867,8536,8621,9061,9833,22928,23049,51776,56924,84254,91754,140803,160851,200576,260425,284656	AKT2,BUB1B,CDK6,ERBB2,IGF2R,PIK3C2A,PRKDC,EIF2AK2,PRPS1,CCL5,AURKA,TTK,TTN,MAPKAPK3,CAMK1,CDK13,PAPSS1,MELK,SEPHS2,SMG1,MAP3K20,PAK6,CAMKK1,NEK9,TRPM6,DGKH,PIKFYVE,MAGI3,EPHA10	29/724
5_Member	GO Molecular Functions	GO:0106310	protein serine kinase activity	-6.43376	-3.37407	208,701,1021,5591,5610,6790,7272,7273,7867,8536,8621,9833,23049,51776,56924,84254,91754,140803,200576	AKT2,BUB1B,CDK6,PRKDC,EIF2AK2,AURKA,TTK,TTN,MAPKAPK3,CAMK1,CDK13,MELK,SMG1,MAP3K20,PAK6,CAMKK1,NEK9,TRPM6,PIKFYVE	19/362
5_Member	GO Molecular Functions	GO:0016773	phosphotransferase activity, alcohol group as acceptor	-6.03174	-3.03297	208,701,1021,2064,3482,5286,5591,5610,6352,6790,7272,7273,7867,8536,8621,9061,9833,23049,51776,56924,84254,91754,140803,160851,200576,284656	AKT2,BUB1B,CDK6,ERBB2,IGF2R,PIK3C2A,PRKDC,EIF2AK2,CCL5,AURKA,TTK,TTN,MAPKAPK3,CAMK1,CDK13,PAPSS1,MELK,SMG1,MAP3K20,PAK6,CAMKK1,NEK9,TRPM6,DGKH,PIKFYVE,EPHA10	26/668
5_Member	GO Molecular Functions	GO:0004672	protein kinase activity	-5.76239	-2.81974	208,701,1021,2064,3482,5591,5610,6352,6790,7272,7273,7867,8536,8621,9833,23049,51776,56924,84254,91754,140803,200576,284656	AKT2,BUB1B,CDK6,ERBB2,IGF2R,PRKDC,EIF2AK2,CCL5,AURKA,TTK,TTN,MAPKAPK3,CAMK1,CDK13,MELK,SMG1,MAP3K20,PAK6,CAMKK1,NEK9,TRPM6,PIKFYVE,EPHA10	23/562
5_Member	GO Molecular Functions	GO:0004674	protein serine/threonine kinase activity	-5.35906	-2.52114	208,701,1021,5591,5610,6790,7272,7273,7867,8536,8621,9833,23049,51776,56924,84254,91754,140803,200576	AKT2,BUB1B,CDK6,PRKDC,EIF2AK2,AURKA,TTK,TTN,MAPKAPK3,CAMK1,CDK13,MELK,SMG1,MAP3K20,PAK6,CAMKK1,NEK9,TRPM6,PIKFYVE	19/428
5_Member	GO Biological Processes	GO:0006468	protein phosphorylation	-4.77625	-2.03198	208,891,1021,2064,2915,5591,5610,6790,7097,7272,7273,7867,8536,8621,9833,23049,50937,51776,56924,84254,91754,140803,200576,284656	AKT2,CCNB1,CDK6,ERBB2,GRM5,PRKDC,EIF2AK2,AURKA,TLR2,TTK,TTN,MAPKAPK3,CAMK1,CDK13,MELK,SMG1,CDON,MAP3K20,PAK6,CAMKK1,NEK9,TRPM6,PIKFYVE,EPHA10	24/692
5_Member	GO Biological Processes	GO:0018209	peptidyl-serine modification	-3.45772	-1.15189	208,5591,6790,7272,7867,8536,23049,51776,79625,200576	AKT2,PRKDC,AURKA,TTK,MAPKAPK3,CAMK1,SMG1,MAP3K20,NDNF,PIKFYVE	10/202
5_Member	GO Biological Processes	GO:0018105	peptidyl-serine phosphorylation	-3.12897	-0.953361	208,5591,6790,7272,7867,8536,23049,51776,200576	AKT2,PRKDC,AURKA,TTK,MAPKAPK3,CAMK1,SMG1,MAP3K20,PIKFYVE	9/184
5_Member	GO Biological Processes	GO:0046777	protein autophosphorylation	-3.06273	-0.900418	2064,5610,6790,7272,7867,9833,23049,51776,200576	ERBB2,EIF2AK2,AURKA,TTK,MAPKAPK3,MELK,SMG1,MAP3K20,PIKFYVE	9/188
5_Member	GO Biological Processes	GO:0018193	peptidyl-amino acid modification	-2.81072	-0.749009	208,639,2064,5591,5987,6790,7272,7867,8295,8536,8607,23049,23409,26276,51776,55683,57691,79625,200576,339287	AKT2,PRDM1,ERBB2,PRKDC,TRIM27,AURKA,TTK,MAPKAPK3,TRRAP,CAMK1,RUVBL1,SMG1,SIRT4,VPS33B,MAP3K20,KANSL3,KIAA1586,NDNF,PIKFYVE,MSL1	20/726
6_Summary	GO Molecular Functions	GO:0030695	GTPase regulator activity	-6.74262	-3.62388	2874,5902,6242,8924,8925,9628,9681,9732,9855,10411,25780,26130,29127,54848,55531,64786,81704,84079,139818,160518,203228,345930,414918,3320,80223,81624,85369,114793,201294,891,2073,2915,6352,9994,29893,51776,91754,116519	GPS2,RANBP1,RTKN,HERC2,HERC1,RGS6,DEPDC5,DOCK4,FARP2,RAPGEF3,RASGRP3,GAPVD1,RACGAP1,ARHGEF38,ELMOD1,TBC1D15,DOCK8,ANKRD27,DOCK11,DENND5B,C9orf72,ECT2L,DENND6B,HSP90AA1,RAB11FIP1,DIAPH3,STRIP1,FMNL2,UNC13D,CCNB1,ERCC5,GRM5,CCL5,CASP8AP2,PSMC3IP,MAP3K20,NEK9,APOA5	38/-
6_Member	GO Molecular Functions	GO:0030695	GTPase regulator activity	-6.74262	-3.62388	2874,5902,6242,8924,8925,9628,9681,9732,9855,10411,25780,26130,29127,54848,55531,64786,81704,84079,139818,160518,203228,345930,414918	GPS2,RANBP1,RTKN,HERC2,HERC1,RGS6,DEPDC5,DOCK4,FARP2,RAPGEF3,RASGRP3,GAPVD1,RACGAP1,ARHGEF38,ELMOD1,TBC1D15,DOCK8,ANKRD27,DOCK11,DENND5B,C9orf72,ECT2L,DENND6B	23/493
6_Member	GO Molecular Functions	GO:0060589	nucleoside-triphosphatase regulator activity	-6.68072	-3.58128	2874,5902,6242,8924,8925,9628,9681,9732,9855,10411,25780,26130,29127,54848,55531,64786,81704,84079,139818,160518,203228,345930,414918	GPS2,RANBP1,RTKN,HERC2,HERC1,RGS6,DEPDC5,DOCK4,FARP2,RAPGEF3,RASGRP3,GAPVD1,RACGAP1,ARHGEF38,ELMOD1,TBC1D15,DOCK8,ANKRD27,DOCK11,DENND5B,C9orf72,ECT2L,DENND6B	23/497
6_Member	GO Molecular Functions	GO:0005085	guanyl-nucleotide exchange factor activity	-6.44654	-3.37407	8924,8925,9732,9855,10411,25780,26130,54848,81704,84079,139818,160518,203228,345930,414918	HERC2,HERC1,DOCK4,FARP2,RAPGEF3,RASGRP3,GAPVD1,ARHGEF38,DOCK8,ANKRD27,DOCK11,DENND5B,C9orf72,ECT2L,DENND6B	15/227
6_Member	GO Molecular Functions	GO:0051020	GTPase binding	-4.76887	-2.03198	3320,5902,6242,9732,25780,26130,80223,81624,84079,85369,114793,139818,160518,201294,203228	HSP90AA1,RANBP1,RTKN,DOCK4,RASGRP3,GAPVD1,RAB11FIP1,DIAPH3,ANKRD27,STRIP1,FMNL2,DOCK11,DENND5B,UNC13D,C9orf72	15/311
6_Member	GO Molecular Functions	GO:0031267	small GTPase binding	-4.67888	-1.96499	5902,6242,9732,25780,26130,80223,81624,84079,85369,114793,139818,160518,201294,203228	RANBP1,RTKN,DOCK4,RASGRP3,GAPVD1,RAB11FIP1,DIAPH3,ANKRD27,STRIP1,FMNL2,DOCK11,DENND5B,UNC13D,C9orf72	14/279
6_Member	GO Molecular Functions	GO:0008047	enzyme activator activity	-3.19046	-0.984568	891,2073,2915,5902,6352,9628,9681,9732,9994,25780,26130,29127,29893,51776,55531,64786,84079,91754,116519	CCNB1,ERCC5,GRM5,RANBP1,CCL5,RGS6,DEPDC5,DOCK4,CASP8AP2,RASGRP3,GAPVD1,RACGAP1,PSMC3IP,MAP3K20,ELMOD1,TBC1D15,ANKRD27,NEK9,APOA5	19/625
6_Member	GO Molecular Functions	GO:0005096	GTPase activator activity	-2.41986	-0.52142	5902,9628,9681,9732,25780,26130,29127,55531,64786,84079	RANBP1,RGS6,DEPDC5,DOCK4,RASGRP3,GAPVD1,RACGAP1,ELMOD1,TBC1D15,ANKRD27	10/278
7_Summary	GO Biological Processes	GO:0032989	cellular component morphogenesis	-5.85298	-2.86893	288,2064,3320,3688,4703,5339,5629,6790,6868,7097,7273,8239,22911,56924,57082,57453,57731,80206,84079,84665,200576,203228,222950,284656,667,1778,3831,4308,8411,8927,10021,23001,27445,53616,85461,1000,1001,8925,55236,116448,441549,10765,108,2567,2915,5126,7442,9746	ANK3,ERBB2,HSP90AA1,ITGB1,NEB,PLEC,PROX1,AURKA,ADAM17,TLR2,TTN,USP9X,WDR47,PAK6,KNL1,DSCAML1,SPTBN4,FHOD3,ANKRD27,MYPN,PIKFYVE,C9orf72,NYAP1,EPHA10,DST,DYNC1H1,KLC1,TRPM1,EEA1,BSN,HCN4,WDFY3,PCLO,ADAM22,TANC1,CDH2,CDH3,HERC1,UBA6,OLIG1,CDNF,KDM5B,ADCY2,GABRG3,GRM5,PCSK2,TRPV1,CLSTN3	48/-
7_Member	GO Biological Processes	GO:0032989	cellular component morphogenesis	-5.85298	-2.86893	288,2064,3320,3688,4703,5339,5629,6790,6868,7097,7273,8239,22911,56924,57082,57453,57731,80206,84079,84665,200576,203228,222950,284656	ANK3,ERBB2,HSP90AA1,ITGB1,NEB,PLEC,PROX1,AURKA,ADAM17,TLR2,TTN,USP9X,WDR47,PAK6,KNL1,DSCAML1,SPTBN4,FHOD3,ANKRD27,MYPN,PIKFYVE,C9orf72,NYAP1,EPHA10	24/597
7_Member	GO Cellular Components	GO:0030424	axon	-3.97022	-1.44857	288,667,1778,3320,3831,4308,5339,6790,8239,8411,8927,10021,22911,23001,27445,53616,57453,57731,84665,85461,203228	ANK3,DST,DYNC1H1,HSP90AA1,KLC1,TRPM1,PLEC,AURKA,USP9X,EEA1,BSN,HCN4,WDR47,WDFY3,PCLO,ADAM22,DSCAML1,SPTBN4,MYPN,TANC1,C9orf72	21/634
7_Member	GO Biological Processes	GO:0032990	cell part morphogenesis	-3.50958	-1.18514	288,2064,3320,3688,5339,6790,6868,8239,22911,56924,57453,57731,84079,84665,203228,222950,284656	ANK3,ERBB2,HSP90AA1,ITGB1,PLEC,AURKA,ADAM17,USP9X,WDR47,PAK6,DSCAML1,SPTBN4,ANKRD27,MYPN,C9orf72,NYAP1,EPHA10	17/494
7_Member	GO Biological Processes	GO:0000902	cell morphogenesis	-3.38667	-1.11019	288,1000,1001,2064,3320,3688,5339,5629,6790,6868,8239,22911,56924,57453,57731,84079,84665,203228,222950,284656	ANK3,CDH2,CDH3,ERBB2,HSP90AA1,ITGB1,PLEC,PROX1,AURKA,ADAM17,USP9X,WDR47,PAK6,DSCAML1,SPTBN4,ANKRD27,MYPN,C9orf72,NYAP1,EPHA10	20/651
7_Member	GO Biological Processes	GO:0048812	neuron projection morphogenesis	-3.34571	-1.07487	288,2064,3320,3688,6790,6868,8239,22911,56924,57453,57731,84079,84665,203228,222950,284656	ANK3,ERBB2,HSP90AA1,ITGB1,AURKA,ADAM17,USP9X,WDR47,PAK6,DSCAML1,SPTBN4,ANKRD27,MYPN,C9orf72,NYAP1,EPHA10	16/464
7_Member	GO Biological Processes	GO:0120039	plasma membrane bounded cell projection morphogenesis	-3.29548	-1.04382	288,2064,3320,3688,6790,6868,8239,22911,56924,57453,57731,84079,84665,203228,222950,284656	ANK3,ERBB2,HSP90AA1,ITGB1,AURKA,ADAM17,USP9X,WDR47,PAK6,DSCAML1,SPTBN4,ANKRD27,MYPN,C9orf72,NYAP1,EPHA10	16/469
7_Member	GO Biological Processes	GO:0048858	cell projection morphogenesis	-3.24605	-1.02041	288,2064,3320,3688,6790,6868,8239,22911,56924,57453,57731,84079,84665,203228,222950,284656	ANK3,ERBB2,HSP90AA1,ITGB1,AURKA,ADAM17,USP9X,WDR47,PAK6,DSCAML1,SPTBN4,ANKRD27,MYPN,C9orf72,NYAP1,EPHA10	16/474
7_Member	GO Biological Processes	GO:0031175	neuron projection development	-3.23062	-1.01	288,2064,3320,3688,6790,6868,8239,8925,22911,55236,56924,57453,57731,84079,84665,116448,203228,222950,284656,441549	ANK3,ERBB2,HSP90AA1,ITGB1,AURKA,ADAM17,USP9X,HERC1,WDR47,UBA6,PAK6,DSCAML1,SPTBN4,ANKRD27,MYPN,OLIG1,C9orf72,NYAP1,EPHA10,CDNF	20/670
7_Member	GO Biological Processes	GO:1990138	neuron projection extension	-3.2254	-1.00975	3320,3688,6790,8239,56924,203228	HSP90AA1,ITGB1,AURKA,USP9X,PAK6,C9orf72	6/79
7_Member	GO Biological Processes	GO:0060560	developmental growth involved in morphogenesis	-2.72777	-0.699573	3320,3688,6790,8239,10765,56924,203228	HSP90AA1,ITGB1,AURKA,USP9X,KDM5B,PAK6,C9orf72	7/133
7_Member	GO Biological Processes	GO:0007409	axonogenesis	-2.60572	-0.611417	288,2064,3320,3688,6868,8239,22911,57453,57731,84665,203228,284656	ANK3,ERBB2,HSP90AA1,ITGB1,ADAM17,USP9X,WDR47,DSCAML1,SPTBN4,MYPN,C9orf72,EPHA10	12/352
7_Member	GO Biological Processes	GO:0061564	axon development	-2.52448	-0.574057	288,2064,3320,3688,6868,8239,22911,57453,57731,84665,116448,203228,284656	ANK3,ERBB2,HSP90AA1,ITGB1,ADAM17,USP9X,WDR47,DSCAML1,SPTBN4,MYPN,OLIG1,C9orf72,EPHA10	13/408
7_Member	GO Biological Processes	GO:0048675	axon extension	-2.45048	-0.536962	3320,3688,8239,203228	HSP90AA1,ITGB1,USP9X,C9orf72	4/48
7_Member	GO Biological Processes	GO:0048588	developmental cell growth	-2.42723	-0.525966	3320,3688,6790,8239,56924,203228	HSP90AA1,ITGB1,AURKA,USP9X,PAK6,C9orf72	6/113
7_Member	GO Biological Processes	GO:0016049	cell growth	-2.38986	-0.503609	3320,3688,6790,8239,56924,203228	HSP90AA1,ITGB1,AURKA,USP9X,PAK6,C9orf72	6/115
7_Member	GO Cellular Components	GO:0030425	dendrite	-2.11323	-0.366393	108,288,2567,2915,3320,3688,5126,5339,7442,8927,9746,10021,22911,85461,203228,284656	ADCY2,ANK3,GABRG3,GRM5,HSP90AA1,ITGB1,PCSK2,PLEC,TRPV1,BSN,CLSTN3,HCN4,WDR47,TANC1,C9orf72,EPHA10	16/617
7_Member	GO Cellular Components	GO:0097447	dendritic tree	-2.10056	-0.359555	108,288,2567,2915,3320,3688,5126,5339,7442,8927,9746,10021,22911,85461,203228,284656	ADCY2,ANK3,GABRG3,GRM5,HSP90AA1,ITGB1,PCSK2,PLEC,TRPV1,BSN,CLSTN3,HCN4,WDR47,TANC1,C9orf72,EPHA10	16/619
8_Summary	GO Biological Processes	GO:0097435	supramolecular fiber organization	-5.67242	-2.74273	226,1778,3688,3796,4703,5339,5629,5987,7273,8239,10049,10109,23122,26276,54627,80115,80206,81624,83481,84643,84665,147872,374666,6242,9855,22808,29127,57731,85369,114793,7097,57082,200576,288,667,1000,50937,85461,6876,23499,23336	ALDOA,DYNC1H1,ITGB1,KIF2A,NEB,PLEC,PROX1,TRIM27,TTN,USP9X,DNAJB6,ARPC2,CLASP2,VPS33B,MAP10,BAIAP2L2,FHOD3,DIAPH3,EPPK1,KIF2B,MYPN,KASH5,WASH3P,RTKN,FARP2,MRAS,RACGAP1,SPTBN4,STRIP1,FMNL2,TLR2,KNL1,PIKFYVE,ANK3,DST,CDH2,CDON,TANC1,TAGLN,MACF1,SYNM	41/-
8_Member	GO Biological Processes	GO:0097435	supramolecular fiber organization	-5.67242	-2.74273	226,1778,3688,3796,4703,5339,5629,5987,7273,8239,10049,10109,23122,26276,54627,80115,80206,81624,83481,84643,84665,147872,374666	ALDOA,DYNC1H1,ITGB1,KIF2A,NEB,PLEC,PROX1,TRIM27,TTN,USP9X,DNAJB6,ARPC2,CLASP2,VPS33B,MAP10,BAIAP2L2,FHOD3,DIAPH3,EPPK1,KIF2B,MYPN,KASH5,WASH3P	23/569
8_Member	GO Biological Processes	GO:0030036	actin cytoskeleton organization	-5.5571	-2.66481	226,3688,4703,5339,5629,5987,6242,7273,9855,10049,10109,22808,29127,57731,80115,80206,81624,84665,85369,114793,147872,374666	ALDOA,ITGB1,NEB,PLEC,PROX1,TRIM27,RTKN,TTN,FARP2,DNAJB6,ARPC2,MRAS,RACGAP1,SPTBN4,BAIAP2L2,FHOD3,DIAPH3,MYPN,STRIP1,FMNL2,KASH5,WASH3P	22/536
8_Member	GO Biological Processes	GO:0010927	cellular component assembly involved in morphogenesis	-5.54619	-2.66481	3688,4703,5339,5629,7097,7273,57082,80206,84665,200576	ITGB1,NEB,PLEC,PROX1,TLR2,TTN,KNL1,FHOD3,MYPN,PIKFYVE	10/115
8_Member	GO Biological Processes	GO:0030029	actin filament-based process	-4.82241	-2.05143	226,3688,4703,5339,5629,5987,6242,7273,9855,10049,10109,22808,29127,57731,80115,80206,81624,84665,85369,114793,147872,374666	ALDOA,ITGB1,NEB,PLEC,PROX1,TRIM27,RTKN,TTN,FARP2,DNAJB6,ARPC2,MRAS,RACGAP1,SPTBN4,BAIAP2L2,FHOD3,DIAPH3,MYPN,STRIP1,FMNL2,KASH5,WASH3P	22/597
8_Member	GO Biological Processes	GO:0030239	myofibril assembly	-4.69624	-1.96747	3688,4703,5339,5629,7273,80206,84665	ITGB1,NEB,PLEC,PROX1,TTN,FHOD3,MYPN	7/64
8_Member	GO Biological Processes	GO:0031032	actomyosin structure organization	-4.67797	-1.96499	3688,4703,5339,5629,6242,7273,29127,80206,84665	ITGB1,NEB,PLEC,PROX1,RTKN,TTN,RACGAP1,FHOD3,MYPN	9/115
8_Member	GO Biological Processes	GO:0055002	striated muscle cell development	-4.65161	-1.95387	3688,4703,5339,5629,7273,80206,84665	ITGB1,NEB,PLEC,PROX1,TTN,FHOD3,MYPN	7/65
8_Member	GO Biological Processes	GO:0055003	cardiac myofibril assembly	-4.12003	-1.56734	4703,5629,7273,80206	NEB,PROX1,TTN,FHOD3	4/18
8_Member	GO Cellular Components	GO:0031674	I band	-3.93717	-1.4357	226,288,667,4703,5339,7273,10049,80206,84665	ALDOA,ANK3,DST,NEB,PLEC,TTN,DNAJB6,FHOD3,MYPN	9/143
8_Member	GO Biological Processes	GO:0045214	sarcomere organization	-3.8846	-1.4102	3688,5339,7273,80206,84665	ITGB1,PLEC,TTN,FHOD3,MYPN	5/38
8_Member	GO Biological Processes	GO:0014866	skeletal myofibril assembly	-3.60585	-1.25189	5339,5629,7273	PLEC,PROX1,TTN	3/10
8_Member	GO Cellular Components	GO:0030018	Z disc	-3.51658	-1.18514	288,667,4703,5339,7273,10049,80206,84665	ANK3,DST,NEB,PLEC,TTN,DNAJB6,FHOD3,MYPN	8/129
8_Member	GO Biological Processes	GO:0051146	striated muscle cell differentiation	-3.30889	-1.05408	1000,3688,4703,5339,5629,7273,50937,80206,84665,85461	CDH2,ITGB1,NEB,PLEC,PROX1,TTN,CDON,FHOD3,MYPN,TANC1	10/211
8_Member	GO Biological Processes	GO:0007015	actin filament organization	-3.15677	-0.969758	226,4703,5339,5629,5987,7273,10109,80115,81624,147872,374666	ALDOA,NEB,PLEC,PROX1,TRIM27,TTN,ARPC2,BAIAP2L2,DIAPH3,KASH5,WASH3P	11/261
8_Member	GO Molecular Functions	GO:0003779	actin binding	-3.14121	-0.962943	226,667,3688,4703,5339,6876,7273,10109,23499,57731,80206,81624,84665,114793,374666	ALDOA,DST,ITGB1,NEB,PLEC,TAGLN,TTN,ARPC2,MACF1,SPTBN4,FHOD3,DIAPH3,MYPN,FMNL2,WASH3P	15/438
8_Member	GO Cellular Components	GO:0030016	myofibril	-2.93651	-0.811803	226,288,667,4703,5339,7273,10049,23336,80206,84665	ALDOA,ANK3,DST,NEB,PLEC,TTN,DNAJB6,SYNM,FHOD3,MYPN	10/236
8_Member	GO Biological Processes	GO:0055007	cardiac muscle cell differentiation	-2.87774	-0.782061	3688,4703,5339,5629,7273,80206	ITGB1,NEB,PLEC,PROX1,TTN,FHOD3	6/92
8_Member	GO Cellular Components	GO:0043292	contractile fiber	-2.8154	-0.749009	226,288,667,4703,5339,7273,10049,23336,80206,84665	ALDOA,ANK3,DST,NEB,PLEC,TTN,DNAJB6,SYNM,FHOD3,MYPN	10/245
8_Member	GO Biological Processes	GO:0055013	cardiac muscle cell development	-2.76362	-0.720757	4703,5339,5629,7273,80206	NEB,PLEC,PROX1,TTN,FHOD3	5/66
8_Member	GO Molecular Functions	GO:0008307	structural constituent of muscle	-2.66401	-0.654625	4703,5339,7273,23336	NEB,PLEC,TTN,SYNM	4/42
8_Member	GO Cellular Components	GO:0030017	sarcomere	-2.64647	-0.641668	226,288,667,4703,5339,7273,10049,80206,84665	ALDOA,ANK3,DST,NEB,PLEC,TTN,DNAJB6,FHOD3,MYPN	9/216
8_Member	GO Biological Processes	GO:0055006	cardiac cell development	-2.57034	-0.599127	4703,5339,5629,7273,80206	NEB,PLEC,PROX1,TTN,FHOD3	5/73
8_Member	GO Biological Processes	GO:0042692	muscle cell differentiation	-2.45298	-0.536962	1000,3688,4703,5339,5629,7273,50937,80206,84665,85461	CDH2,ITGB1,NEB,PLEC,PROX1,TTN,CDON,FHOD3,MYPN,TANC1	10/275
8_Member	GO Biological Processes	GO:0035051	cardiocyte differentiation	-2.26536	-0.449763	3688,4703,5339,5629,7273,80206	ITGB1,NEB,PLEC,PROX1,TTN,FHOD3	6/122
8_Member	GO Molecular Functions	GO:0051015	actin filament binding	-2.20355	-0.423925	4703,5339,7273,10109,23499,57731,80206,114793	NEB,PLEC,TTN,ARPC2,MACF1,SPTBN4,FHOD3,FMNL2	8/208
8_Member	GO Biological Processes	GO:0055001	muscle cell development	-2.18375	-0.411866	3688,4703,5339,5629,7273,80206,84665	ITGB1,NEB,PLEC,PROX1,TTN,FHOD3,MYPN	7/167
9_Summary	GO Molecular Functions	GO:0140657	ATP-dependent activity	-5.57152	-2.66666	368,1105,1778,3320,3796,5189,7153,8607,8883,9879,10058,10112,10351,10575,23120,27127,55236,55345,55601,79132,84643,116285,154664,9628,22808,11165	ABCC6,CHD1,DYNC1H1,HSP90AA1,KIF2A,PEX1,TOP2A,RUVBL1,NAE1,DDX46,ABCB6,KIF20A,ABCA8,CCT4,ATP10B,SMC1B,UBA6,ZGRF1,DDX60,DHX58,KIF2B,ACSM1,ABCA13,RGS6,MRAS,NUDT3	26/-
9_Member	GO Molecular Functions	GO:0140657	ATP-dependent activity	-5.57152	-2.66666	368,1105,1778,3320,3796,5189,7153,8607,8883,9879,10058,10112,10351,10575,23120,27127,55236,55345,55601,79132,84643,116285,154664	ABCC6,CHD1,DYNC1H1,HSP90AA1,KIF2A,PEX1,TOP2A,RUVBL1,NAE1,DDX46,ABCB6,KIF20A,ABCA8,CCT4,ATP10B,SMC1B,UBA6,ZGRF1,DDX60,DHX58,KIF2B,ACSM1,ABCA13	23/577
9_Member	GO Molecular Functions	GO:0016887	ATP hydrolysis activity	-4.33018	-1.72027	368,1105,3320,3796,5189,8607,9879,10058,10112,10351,10575,23120,27127,55601,79132,84643	ABCC6,CHD1,HSP90AA1,KIF2A,PEX1,RUVBL1,DDX46,ABCB6,KIF20A,ABCA8,CCT4,ATP10B,SMC1B,DDX60,DHX58,KIF2B	16/380
9_Member	GO Molecular Functions	GO:0017111	ribonucleoside triphosphate phosphatase activity	-2.21393	-0.423931	368,1105,3320,3796,5189,8607,9628,9879,10058,10112,10351,10575,22808,23120,27127,55601,79132,84643	ABCC6,CHD1,HSP90AA1,KIF2A,PEX1,RUVBL1,RGS6,DDX46,ABCB6,KIF20A,ABCA8,CCT4,MRAS,ATP10B,SMC1B,DDX60,DHX58,KIF2B	18/710
9_Member	GO Molecular Functions	GO:0016462	pyrophosphatase activity	-2.18081	-0.411607	368,1105,3320,3796,5189,8607,9628,9879,10058,10112,10351,10575,11165,22808,23120,27127,55601,79132,84643	ABCC6,CHD1,HSP90AA1,KIF2A,PEX1,RUVBL1,RGS6,DDX46,ABCB6,KIF20A,ABCA8,CCT4,NUDT3,MRAS,ATP10B,SMC1B,DDX60,DHX58,KIF2B	19/771
9_Member	GO Molecular Functions	GO:0016817	hydrolase activity, acting on acid anhydrides	-2.17508	-0.408515	368,1105,3320,3796,5189,8607,9628,9879,10058,10112,10351,10575,11165,22808,23120,27127,55601,79132,84643	ABCC6,CHD1,HSP90AA1,KIF2A,PEX1,RUVBL1,RGS6,DDX46,ABCB6,KIF20A,ABCA8,CCT4,NUDT3,MRAS,ATP10B,SMC1B,DDX60,DHX58,KIF2B	19/772
9_Member	GO Molecular Functions	GO:0016818	hydrolase activity, acting on acid anhydrides, in phosphorus-containing anhydrides	-2.17508	-0.408515	368,1105,3320,3796,5189,8607,9628,9879,10058,10112,10351,10575,11165,22808,23120,27127,55601,79132,84643	ABCC6,CHD1,HSP90AA1,KIF2A,PEX1,RUVBL1,RGS6,DDX46,ABCB6,KIF20A,ABCA8,CCT4,NUDT3,MRAS,ATP10B,SMC1B,DDX60,DHX58,KIF2B	19/772
10_Summary	Reactome Gene Sets	R-HSA-453279	Mitotic G1 phase and G1/S transition	-5.34406	-2.51636	208,891,1021,4605,5691,5707,5714,5719,6118,7153,8318,368,5824,10058,10351,160,288,2064,3320,3688,5306,6175,9855,10109,23122,56924,57453,57716,57731,131873,284656,701,6790,1778,3796,3831,7097,7328,8065,8924,8925,10112,10411,23352,25780,29127,55236,84643,135892,5987,51720,2122,5468,108,6868,50937,64399,3184,5971,2874,3839,5610,5902,6185,6829,11282,26276,89853,8239,8883,54994,57602,84669,284996,4419…	AKT2,CCNB1,CDK6,MYBL2,PSMB3,PSMD1,PSMD8,PSMD13,RPA2,TOP2A,CDC45,ABCC6,PEX19,ABCB6,ABCA8,AP2A1,ANK3,ERBB2,HSP90AA1,ITGB1,PITPNA,RPLP0,FARP2,ARPC2,CLASP2,PAK6,DSCAML1,PRX,SPTBN4,COL6A6,EPHA10,BUB1B,AURKA,DYNC1H1,KIF2A,KLC1,TLR2,UBE2H,CUL5,HERC2,HERC1,KIF20A,RAPGEF3,UBR4,RASGRP3,RACGAP1,UBA6,KIF2B,TRIM50,TRIM27,UIMC1,MECOM,PPARG,ADCY2,ADAM17,CDON,HHIP,HNRNPD,RELB,GPS2,KPNA3,EIF2AK2,RANBP1,RPN2,SUPT5…	89/-
10_Member	Reactome Gene Sets	R-HSA-453279	Mitotic G1 phase and G1/S transition	-5.34406	-2.51636	208,891,1021,4605,5691,5707,5714,5719,6118,7153,8318	AKT2,CCNB1,CDK6,MYBL2,PSMB3,PSMD1,PSMD8,PSMD13,RPA2,TOP2A,CDC45	11/149
10_Member	Reactome Gene Sets	R-HSA-382556	ABC-family proteins mediated transport	-4.19611	-1.62704	368,5691,5707,5714,5719,5824,10058,10351	ABCC6,PSMB3,PSMD1,PSMD8,PSMD13,PEX19,ABCB6,ABCA8	8/103
10_Member	Reactome Gene Sets	R-HSA-9675108	Nervous system development	-4.06104	-1.52929	160,288,2064,3320,3688,5306,5691,5707,5714,5719,6175,9855,10109,23122,56924,57453,57716,57731,131873,284656	AP2A1,ANK3,ERBB2,HSP90AA1,ITGB1,PITPNA,PSMB3,PSMD1,PSMD8,PSMD13,RPLP0,FARP2,ARPC2,CLASP2,PAK6,DSCAML1,PRX,SPTBN4,COL6A6,EPHA10	20/578
10_Member	Reactome Gene Sets	R-HSA-422475	Axon guidance	-3.84705	-1.37827	160,288,2064,3320,3688,5306,5691,5707,5714,5719,6175,9855,10109,23122,56924,57453,57731,131873,284656	AP2A1,ANK3,ERBB2,HSP90AA1,ITGB1,PITPNA,PSMB3,PSMD1,PSMD8,PSMD13,RPLP0,FARP2,ARPC2,CLASP2,PAK6,DSCAML1,SPTBN4,COL6A6,EPHA10	19/553
10_Member	Reactome Gene Sets	R-HSA-174143	APC/C-mediated degradation of cell cycle proteins	-3.80318	-1.35586	701,891,5691,5707,5714,5719,6790	BUB1B,CCNB1,PSMB3,PSMD1,PSMD8,PSMD13,AURKA	7/88
10_Member	Reactome Gene Sets	R-HSA-453276	Regulation of mitotic cell cycle	-3.80318	-1.35586	701,891,5691,5707,5714,5719,6790	BUB1B,CCNB1,PSMB3,PSMD1,PSMD8,PSMD13,AURKA	7/88
10_Member	Reactome Gene Sets	R-HSA-1280218	Adaptive Immune System	-3.64417	-1.27643	160,208,1778,3688,3796,3831,5691,5707,5714,5719,7097,7328,8065,8924,8925,10112,10411,23352,25780,29127,55236,84643,135892	AP2A1,AKT2,DYNC1H1,ITGB1,KIF2A,KLC1,PSMB3,PSMD1,PSMD8,PSMD13,TLR2,UBE2H,CUL5,HERC2,HERC1,KIF20A,RAPGEF3,UBR4,RASGRP3,RACGAP1,UBA6,KIF2B,TRIM50	23/769
10_Member	Reactome Gene Sets	R-HSA-8948751	Regulation of PTEN stability and activity	-3.54322	-1.20325	208,5691,5707,5714,5719,5987	AKT2,PSMB3,PSMD1,PSMD8,PSMD13,TRIM27	6/69
10_Member	Reactome Gene Sets	R-HSA-69206	G1/S Transition	-3.47141	-1.15946	208,891,5691,5707,5714,5719,6118,8318	AKT2,CCNB1,PSMB3,PSMD1,PSMD8,PSMD13,RPA2,CDC45	8/131
10_Member	Reactome Gene Sets	R-HSA-69481	G2/M Checkpoints	-3.43304	-1.13622	891,5691,5707,5714,5719,6118,8318,8924,51720	CCNB1,PSMB3,PSMD1,PSMD8,PSMD13,RPA2,CDC45,HERC2,UIMC1	9/167
10_Member	Reactome Gene Sets	R-HSA-176409	APC/C:Cdc20 mediated degradation of mitotic proteins	-3.31548	-1.05571	701,891,5691,5707,5714,5719	BUB1B,CCNB1,PSMB3,PSMD1,PSMD8,PSMD13	6/76
10_Member	Reactome Gene Sets	R-HSA-176814	Activation of APC/C and APC/C:Cdc20 mediated degradation of mitotic proteins	-3.28499	-1.03987	701,891,5691,5707,5714,5719	BUB1B,CCNB1,PSMB3,PSMD1,PSMD8,PSMD13	6/77
10_Member	Reactome Gene Sets	R-HSA-8852276	The role of GTSE1 in G2/M progression after G2 checkpoint	-3.28499	-1.03987	891,3320,5691,5707,5714,5719	CCNB1,HSP90AA1,PSMB3,PSMD1,PSMD8,PSMD13	6/77
10_Member	Reactome Gene Sets	R-HSA-6807070	PTEN Regulation	-3.27832	-1.03987	208,2122,5468,5691,5707,5714,5719,5987	AKT2,MECOM,PPARG,PSMB3,PSMD1,PSMD8,PSMD13,TRIM27	8/140
10_Member	Reactome Gene Sets	R-HSA-5619084	ABC transporter disorders	-3.25497	-1.0268	368,5691,5707,5714,5719,10058	ABCC6,PSMB3,PSMD1,PSMD8,PSMD13,ABCB6	6/78
10_Member	Reactome Gene Sets	R-HSA-176408	Regulation of APC/C activators between G1/S and early anaphase	-3.16759	-0.97007	701,891,5691,5707,5714,5719	BUB1B,CCNB1,PSMB3,PSMD1,PSMD8,PSMD13	6/81
10_Member	Reactome Gene Sets	R-HSA-180585	Vif-mediated degradation of APOBEC3G	-3.1594	-0.97007	5691,5707,5714,5719,8065	PSMB3,PSMD1,PSMD8,PSMD13,CUL5	5/54
10_Member	Reactome Gene Sets	R-HSA-8854050	FBXL7 down-regulates AURKA during mitotic entry and in early mitosis	-3.1594	-0.97007	5691,5707,5714,5719,6790	PSMB3,PSMD1,PSMD8,PSMD13,AURKA	5/54
10_Member	Reactome Gene Sets	R-HSA-5358351	Signaling by Hedgehog	-3.10031	-0.92918	108,5691,5707,5714,5719,6868,50937,64399	ADCY2,PSMB3,PSMD1,PSMD8,PSMD13,ADAM17,CDON,HHIP	8/149
10_Member	Reactome Gene Sets	R-HSA-450408	AUF1 (hnRNP D0) binds and destabilizes mRNA	-3.08663	-0.922129	3184,5691,5707,5714,5719	HNRNPD,PSMB3,PSMD1,PSMD8,PSMD13	5/56
10_Member	Reactome Gene Sets	R-HSA-5632684	Hedgehog 'on' state	-3.05696	-0.89682	5691,5707,5714,5719,50937,64399	PSMB3,PSMD1,PSMD8,PSMD13,CDON,HHIP	6/85
10_Member	Reactome Gene Sets	R-HSA-5676590	NIK-->noncanonical NF-kB signaling	-2.98301	-0.846121	5691,5707,5714,5719,5971	PSMB3,PSMD1,PSMD8,PSMD13,RELB	5/59
10_Member	Reactome Gene Sets	R-HSA-5607761	Dectin-1 mediated noncanonical NF-kB signaling	-2.94983	-0.82312	5691,5707,5714,5719,5971	PSMB3,PSMD1,PSMD8,PSMD13,RELB	5/60
10_Member	CORUM	CORUM:193	PA700-20S-PA28 complex	-2.91611	-0.799331	5691,5707,5714,5719	PSMB3,PSMD1,PSMD8,PSMD13	4/36
10_Member	Reactome Gene Sets	R-HSA-9824446	Viral Infection Pathways	-2.89142	-0.78247	160,208,1778,2874,3320,3688,3839,5610,5691,5707,5714,5719,5902,6175,6185,6829,7097,8065,11282,26276,89853	AP2A1,AKT2,DYNC1H1,GPS2,HSP90AA1,ITGB1,KPNA3,EIF2AK2,PSMB3,PSMD1,PSMD8,PSMD13,RANBP1,RPLP0,RPN2,SUPT5H,TLR2,CUL5,MGAT4B,VPS33B,MVB12B	21/767
10_Member	WikiPathways	WP183	Proteasome degradation	-2.8854	-0.78247	5691,5707,5714,5719,6185	PSMB3,PSMD1,PSMD8,PSMD13,RPN2	5/62
10_Member	Reactome Gene Sets	R-HSA-5358346	Hedgehog ligand biogenesis	-2.79323	-0.739839	5691,5707,5714,5719,6868	PSMB3,PSMD1,PSMD8,PSMD13,ADAM17	5/65
10_Member	Reactome Gene Sets	R-HSA-162909	Host Interactions of HIV factors	-2.78438	-0.73483	160,5691,5707,5714,5719,5902,8065	AP2A1,PSMB3,PSMD1,PSMD8,PSMD13,RANBP1,CUL5	7/130
10_Member	GO Biological Processes	GO:0006511	ubiquitin-dependent protein catabolic process	-2.76871	-0.722518	5691,5707,5714,5719,6790,7328,8065,8239,8883,8924,23352,54994,55236,57602,84669,89853,284996	PSMB3,PSMD1,PSMD8,PSMD13,AURKA,UBE2H,CUL5,USP9X,NAE1,HERC2,UBR4,GID8,UBA6,USP36,USP32,MVB12B,RNF149	17/577
10_Member	GO Cellular Components	GO:0005838	proteasome regulatory particle	-2.73663	-0.706821	5707,5714,5719	PSMD1,PSMD8,PSMD13	3/19
10_Member	GO Biological Processes	GO:0019941	modification-dependent protein catabolic process	-2.69097	-0.66755	5691,5707,5714,5719,6790,7328,8065,8239,8883,8924,23352,54994,55236,57602,84669,89853,284996	PSMB3,PSMD1,PSMD8,PSMD13,AURKA,UBE2H,CUL5,USP9X,NAE1,HERC2,UBR4,GID8,UBA6,USP36,USP32,MVB12B,RNF149	17/587
10_Member	CORUM	CORUM:32	PA700 complex	-2.67024	-0.657781	5707,5714,5719	PSMD1,PSMD8,PSMD13	3/20
10_Member	GO Biological Processes	GO:0043632	modification-dependent macromolecule catabolic process	-2.60054	-0.608743	5691,5707,5714,5719,6790,7328,8065,8239,8883,8924,23352,54994,55236,57602,84669,89853,284996	PSMB3,PSMD1,PSMD8,PSMD13,AURKA,UBE2H,CUL5,USP9X,NAE1,HERC2,UBR4,GID8,UBA6,USP36,USP32,MVB12B,RNF149	17/599
10_Member	WikiPathways	WP5124	Alzheimer's disease	-2.59088	-0.605379	208,3831,5610,5691,5707,5714,5719,6868,8883,441925	AKT2,KLC1,EIF2AK2,PSMB3,PSMD1,PSMD8,PSMD13,ADAM17,NAE1,BECN2	10/263
10_Member	Reactome Gene Sets	R-HSA-9006925	Intracellular signaling by second messengers	-2.57481	-0.599127	108,208,2064,2122,5468,5691,5707,5714,5719,5987,84254	ADCY2,AKT2,ERBB2,MECOM,PPARG,PSMB3,PSMD1,PSMD8,PSMD13,TRIM27,CAMKK1	11/309
10_Member	Reactome Gene Sets	R-HSA-983168	Antigen processing: Ubiquitination & Proteasome degradation	-2.57481	-0.599127	5691,5707,5714,5719,7328,8065,8924,8925,23352,55236,135892	PSMB3,PSMD1,PSMD8,PSMD13,UBE2H,CUL5,HERC2,HERC1,UBR4,UBA6,TRIM50	11/309
10_Member	Reactome Gene Sets	R-HSA-174184	Cdc20:Phospho-APC/C mediated degradation of Cyclin A	-2.57034	-0.599127	701,5691,5707,5714,5719	BUB1B,PSMB3,PSMD1,PSMD8,PSMD13	5/73
10_Member	Reactome Gene Sets	R-HSA-174178	APC/C:Cdh1 mediated degradation of Cdc20 and other APC/C:Cdh1 targeted proteins in late mitosis/early G1	-2.54455	-0.589885	5691,5707,5714,5719,6790	PSMB3,PSMD1,PSMD8,PSMD13,AURKA	5/74
10_Member	Reactome Gene Sets	R-HSA-179419	APC:Cdc20 mediated degradation of cell cycle proteins prior to satisfation of the cell cycle checkpoint	-2.54455	-0.589885	701,5691,5707,5714,5719	BUB1B,PSMB3,PSMD1,PSMD8,PSMD13	5/74
10_Member	KEGG Pathway	hsa03050	Proteasome	-2.51803	-0.574057	5691,5707,5714,5719	PSMB3,PSMD1,PSMD8,PSMD13	4/46
10_Member	GO Cellular Components	GO:0022624	proteasome accessory complex	-2.49151	-0.557972	5707,5714,5719	PSMD1,PSMD8,PSMD13	3/23
10_Member	Reactome Gene Sets	R-HSA-162906	HIV Infection	-2.45265	-0.536962	160,5691,5707,5714,5719,5902,6829,8065,89853	AP2A1,PSMB3,PSMD1,PSMD8,PSMD13,RANBP1,SUPT5H,CUL5,MVB12B	9/231
10_Member	Reactome Gene Sets	R-HSA-1236978	Cross-presentation of soluble exogenous antigens (endosomes)	-2.41792	-0.52142	5691,5707,5714,5719	PSMB3,PSMD1,PSMD8,PSMD13	4/49
10_Member	Reactome Gene Sets	R-HSA-211733	Regulation of activated PAK-2p34 by proteasome mediated degradation	-2.38614	-0.503609	5691,5707,5714,5719	PSMB3,PSMD1,PSMD8,PSMD13	4/50
10_Member	Reactome Gene Sets	R-HSA-71291	Metabolism of amino acids and derivatives	-2.37647	-0.496016	2875,4141,5691,5707,5714,5719,6175,6539,6999,9061,10157,22928	GPT,MARS1,PSMB3,PSMD1,PSMD8,PSMD13,RPLP0,SLC6A12,TDO2,PAPSS1,AASS,SEPHS2	12/376
10_Member	Reactome Gene Sets	R-HSA-350562	Regulation of ornithine decarboxylase (ODC)	-2.35509	-0.484464	5691,5707,5714,5719	PSMB3,PSMD1,PSMD8,PSMD13	4/51
10_Member	Reactome Gene Sets	R-HSA-983169	Class I MHC mediated antigen processing & presentation	-2.33152	-0.475308	5691,5707,5714,5719,7097,7328,8065,8924,8925,23352,55236,135892	PSMB3,PSMD1,PSMD8,PSMD13,TLR2,UBE2H,CUL5,HERC2,HERC1,UBR4,UBA6,TRIM50	12/381
10_Member	Reactome Gene Sets	R-HSA-1168372	Downstream signaling events of B Cell Receptor (BCR)	-2.32998	-0.475308	5691,5707,5714,5719,25780	PSMB3,PSMD1,PSMD8,PSMD13,RASGRP3	5/83
10_Member	Reactome Gene Sets	R-HSA-69202	Cyclin E associated events during G1/S transition	-2.32998	-0.475308	208,5691,5707,5714,5719	AKT2,PSMB3,PSMD1,PSMD8,PSMD13	5/83
10_Member	Reactome Gene Sets	R-HSA-180534	Vpu mediated degradation of CD4	-2.32475	-0.475308	5691,5707,5714,5719	PSMB3,PSMD1,PSMD8,PSMD13	4/52
10_Member	Reactome Gene Sets	R-HSA-349425	Autodegradation of the E3 ubiquitin ligase COP1	-2.32475	-0.475308	5691,5707,5714,5719	PSMB3,PSMD1,PSMD8,PSMD13	4/52
10_Member	Reactome Gene Sets	R-HSA-69601	Ubiquitin Mediated Degradation of Phosphorylated Cdc25A	-2.32475	-0.475308	5691,5707,5714,5719	PSMB3,PSMD1,PSMD8,PSMD13	4/52
10_Member	Reactome Gene Sets	R-HSA-69610	p53-Independent DNA Damage Response	-2.32475	-0.475308	5691,5707,5714,5719	PSMB3,PSMD1,PSMD8,PSMD13	4/52
10_Member	Reactome Gene Sets	R-HSA-69613	p53-Independent G1/S DNA damage checkpoint	-2.32475	-0.475308	5691,5707,5714,5719	PSMB3,PSMD1,PSMD8,PSMD13	4/52
10_Member	Reactome Gene Sets	R-HSA-75815	Ubiquitin-dependent degradation of Cyclin D	-2.32475	-0.475308	5691,5707,5714,5719	PSMB3,PSMD1,PSMD8,PSMD13	4/52
10_Member	Reactome Gene Sets	R-HSA-9762114	GSK3B and BTRC:CUL1-mediated-degradation of NFE2L2	-2.32475	-0.475308	5691,5707,5714,5719	PSMB3,PSMD1,PSMD8,PSMD13	4/52
10_Member	KEGG Pathway	hsa05010	Alzheimer disease	-2.30499	-0.462919	208,2915,3831,4695,5610,5691,5707,5714,5719,6868,8883,441925	AKT2,GRM5,KLC1,NDUFA2,EIF2AK2,PSMB3,PSMD1,PSMD8,PSMD13,ADAM17,NAE1,BECN2	12/384
10_Member	Reactome Gene Sets	R-HSA-169911	Regulation of Apoptosis	-2.29509	-0.45858	5691,5707,5714,5719	PSMB3,PSMD1,PSMD8,PSMD13	4/53
10_Member	Reactome Gene Sets	R-HSA-69656	Cyclin A:Cdk2-associated events at S phase entry	-2.28615	-0.456889	208,5691,5707,5714,5719	AKT2,PSMB3,PSMD1,PSMD8,PSMD13	5/85
10_Member	Reactome Gene Sets	R-HSA-69239	Synthesis of DNA	-2.28257	-0.456889	5691,5707,5714,5719,6118,8318	PSMB3,PSMD1,PSMD8,PSMD13,RPA2,CDC45	6/121
10_Member	Reactome Gene Sets	R-HSA-8878166	Transcriptional regulation by RUNX2	-2.28257	-0.456889	208,891,5691,5707,5714,5719	AKT2,CCNB1,PSMB3,PSMD1,PSMD8,PSMD13	6/121
10_Member	KEGG Pathway	hsa05169	Epstein-Barr virus infection	-2.27807	-0.45339	208,1021,5610,5707,5714,5719,5971,7097	AKT2,CDK6,EIF2AK2,PSMD1,PSMD8,PSMD13,RELB,TLR2	8/202
10_Member	Reactome Gene Sets	R-HSA-9604323	Negative regulation of NOTCH4 signaling	-2.26609	-0.449763	5691,5707,5714,5719	PSMB3,PSMD1,PSMD8,PSMD13	4/54
10_Member	GO Biological Processes	GO:0051603	proteolysis involved in protein catabolic process	-2.24834	-0.441185	5691,5707,5714,5719,6790,7328,8065,8239,8883,8924,23352,54994,55236,57602,84669,89853,284996	PSMB3,PSMD1,PSMD8,PSMD13,AURKA,UBE2H,CUL5,USP9X,NAE1,HERC2,UBR4,GID8,UBA6,USP36,USP32,MVB12B,RNF149	17/650
10_Member	Reactome Gene Sets	R-HSA-69242	S Phase	-2.23978	-0.440784	208,5691,5707,5714,5719,6118,8318	AKT2,PSMB3,PSMD1,PSMD8,PSMD13,RPA2,CDC45	7/163
10_Member	Reactome Gene Sets	R-HSA-174113	SCF-beta-TrCP mediated degradation of Emi1	-2.23771	-0.440784	5691,5707,5714,5719	PSMB3,PSMD1,PSMD8,PSMD13	4/55
10_Member	Reactome Gene Sets	R-HSA-4641257	Degradation of AXIN	-2.23771	-0.440784	5691,5707,5714,5719	PSMB3,PSMD1,PSMD8,PSMD13	4/55
10_Member	Reactome Gene Sets	R-HSA-8941858	Regulation of RUNX3 expression and activity	-2.23771	-0.440784	5691,5707,5714,5719	PSMB3,PSMD1,PSMD8,PSMD13	4/55
10_Member	Reactome Gene Sets	R-HSA-450531	Regulation of mRNA stability by proteins that bind AU-rich elements	-2.22275	-0.429965	3184,5691,5707,5714,5719	HNRNPD,PSMB3,PSMD1,PSMD8,PSMD13	5/88
10_Member	Reactome Gene Sets	R-HSA-5362768	Hh mutants are degraded by ERAD	-2.20995	-0.423925	5691,5707,5714,5719	PSMB3,PSMD1,PSMD8,PSMD13	4/56
10_Member	GO Biological Processes	GO:0030163	protein catabolic process	-2.20388	-0.423925	3320,5691,5707,5714,5719,6790,7328,8065,8239,8883,8924,9313,23352,54994,55236,57602,84669,89853,284996	HSP90AA1,PSMB3,PSMD1,PSMD8,PSMD13,AURKA,UBE2H,CUL5,USP9X,NAE1,HERC2,MMP20,UBR4,GID8,UBA6,USP36,USP32,MVB12B,RNF149	19/767
10_Member	Reactome Gene Sets	R-HSA-4641258	Degradation of DVL	-2.18276	-0.411866	5691,5707,5714,5719	PSMB3,PSMD1,PSMD8,PSMD13	4/57
10_Member	Reactome Gene Sets	R-HSA-69541	Stabilization of p53	-2.18276	-0.411866	5691,5707,5714,5719	PSMB3,PSMD1,PSMD8,PSMD13	4/57
10_Member	Reactome Gene Sets	R-HSA-1236974	ER-Phagosome pathway	-2.18195	-0.411866	5691,5707,5714,5719,7097	PSMB3,PSMD1,PSMD8,PSMD13,TLR2	5/90
10_Member	Reactome Gene Sets	R-HSA-5357801	Programmed Cell Death	-2.14372	-0.389267	208,3320,4001,5339,5691,5707,5714,5719	AKT2,HSP90AA1,LMNB1,PLEC,PSMB3,PSMD1,PSMD8,PSMD13	8/213
10_Member	Reactome Gene Sets	R-HSA-4086400	PCP/CE pathway	-2.14227	-0.388675	160,5691,5707,5714,5719	AP2A1,PSMB3,PSMD1,PSMD8,PSMD13	5/92
10_Member	KEGG Pathway	hsa05016	Huntington disease	-2.13423	-0.38148	160,2915,3831,4695,5468,5691,5707,5714,5719,441925	AP2A1,GRM5,KLC1,NDUFA2,PPARG,PSMB3,PSMD1,PSMD8,PSMD13,BECN2	10/306
10_Member	Reactome Gene Sets	R-HSA-351202	Metabolism of polyamines	-2.13006	-0.37985	5691,5707,5714,5719	PSMB3,PSMD1,PSMD8,PSMD13	4/59
10_Member	Reactome Gene Sets	R-HSA-5387390	Hh mutants abrogate ligand secretion	-2.13006	-0.37985	5691,5707,5714,5719	PSMB3,PSMD1,PSMD8,PSMD13	4/59
10_Member	GO Cellular Components	GO:0000502	proteasome complex	-2.1045	-0.361832	5691,5707,5714,5719	PSMB3,PSMD1,PSMD8,PSMD13	4/60
10_Member	Reactome Gene Sets	R-HSA-187577	SCF(Skp2)-mediated degradation of p27/p21	-2.1045	-0.361832	5691,5707,5714,5719	PSMB3,PSMD1,PSMD8,PSMD13	4/60
10_Member	Reactome Gene Sets	R-HSA-5610780	Degradation of GLI1 by the proteasome	-2.1045	-0.361832	5691,5707,5714,5719	PSMB3,PSMD1,PSMD8,PSMD13	4/60
10_Member	Reactome Gene Sets	R-HSA-5610783	Degradation of GLI2 by the proteasome	-2.1045	-0.361832	5691,5707,5714,5719	PSMB3,PSMD1,PSMD8,PSMD13	4/60
10_Member	Reactome Gene Sets	R-HSA-5610785	GLI3 is processed to GLI3R by the proteasome	-2.1045	-0.361832	5691,5707,5714,5719	PSMB3,PSMD1,PSMD8,PSMD13	4/60
10_Member	Reactome Gene Sets	R-HSA-5678895	Defective CFTR causes cystic fibrosis	-2.07945	-0.348255	5691,5707,5714,5719	PSMB3,PSMD1,PSMD8,PSMD13	4/61
10_Member	Reactome Gene Sets	R-HSA-5619115	Disorders of transmembrane transporters	-2.0641	-0.335321	368,1356,5691,5707,5714,5719,10058	ABCC6,CP,PSMB3,PSMD1,PSMD8,PSMD13,ABCB6	7/176
10_Member	Reactome Gene Sets	R-HSA-1257604	PIP3 activates AKT signaling	-2.05274	-0.324765	208,2064,2122,5468,5691,5707,5714,5719,5987	AKT2,ERBB2,MECOM,PPARG,PSMB3,PSMD1,PSMD8,PSMD13,TRIM27	9/267
10_Member	Reactome Gene Sets	R-HSA-109581	Apoptosis	-2.01358	-0.301875	208,4001,5339,5691,5707,5714,5719	AKT2,LMNB1,PLEC,PSMB3,PSMD1,PSMD8,PSMD13	7/180
10_Member	Reactome Gene Sets	R-HSA-174084	Autodegradation of Cdh1 by Cdh1:APC/C	-2.00717	-0.301875	5691,5707,5714,5719	PSMB3,PSMD1,PSMD8,PSMD13	4/64
10_Member	Reactome Gene Sets	R-HSA-4608870	Asymmetric localization of PCP proteins	-2.00717	-0.301875	5691,5707,5714,5719	PSMB3,PSMD1,PSMD8,PSMD13	4/64
11_Summary	GO Biological Processes	GO:0010564	regulation of cell cycle process	-5.16521	-2.3475	701,891,1021,1063,1778,5017,5591,5629,5902,6118,6790,6868,7272,8318,8883,9700,10112,11190,29127,51149,51720,51776,54627,79598,84643,163786,5468,7153,22911,23122,23671,57731,80206,84079,84260,10011,91754,27127,57082,3184,8607,10575,23049,7097,10049,10411,22828	BUB1B,CCNB1,CDK6,CENPF,DYNC1H1,OVOL1,PRKDC,PROX1,RANBP1,RPA2,AURKA,ADAM17,TTK,CDC45,NAE1,ESPL1,KIF20A,CEP250,RACGAP1,MRNIP,UIMC1,MAP3K20,MAP10,CEP97,KIF2B,SASS6,PPARG,TOP2A,WDR47,CLASP2,TMEFF2,SPTBN4,FHOD3,ANKRD27,TCHP,SRA1,NEK9,SMC1B,KNL1,HNRNPD,RUVBL1,CCT4,SMG1,TLR2,DNAJB6,RAPGEF3,SCAF8	47/-
11_Member	GO Biological Processes	GO:0010564	regulation of cell cycle process	-5.16521	-2.3475	701,891,1021,1063,1778,5017,5591,5629,5902,6118,6790,6868,7272,8318,8883,9700,10112,11190,29127,51149,51720,51776,54627,79598,84643,163786	BUB1B,CCNB1,CDK6,CENPF,DYNC1H1,OVOL1,PRKDC,PROX1,RANBP1,RPA2,AURKA,ADAM17,TTK,CDC45,NAE1,ESPL1,KIF20A,CEP250,RACGAP1,MRNIP,UIMC1,MAP3K20,MAP10,CEP97,KIF2B,SASS6	26/746
11_Member	GO Biological Processes	GO:1901987	regulation of cell cycle phase transition	-4.43063	-1.75479	701,891,1021,1063,5017,5591,5629,6118,6790,6868,7272,8318,8883,9700,51149,51720,51776,163786	BUB1B,CCNB1,CDK6,CENPF,OVOL1,PRKDC,PROX1,RPA2,AURKA,ADAM17,TTK,CDC45,NAE1,ESPL1,MRNIP,UIMC1,MAP3K20,SASS6	18/456
11_Member	GO Biological Processes	GO:0000075	cell cycle checkpoint signaling	-4.35668	-1.73436	701,1063,5591,6118,7272,8318,8883,51149,51720,51776	BUB1B,CENPF,PRKDC,RPA2,TTK,CDC45,NAE1,MRNIP,UIMC1,MAP3K20	10/157
11_Member	GO Biological Processes	GO:1901990	regulation of mitotic cell cycle phase transition	-4.11264	-1.56528	701,891,1021,1063,5591,6118,6790,6868,7272,8883,9700,51149,51720,51776,163786	BUB1B,CCNB1,CDK6,CENPF,PRKDC,RPA2,AURKA,ADAM17,TTK,NAE1,ESPL1,MRNIP,UIMC1,MAP3K20,SASS6	15/355
11_Member	GO Biological Processes	GO:0010639	negative regulation of organelle organization	-3.74746	-1.34165	701,1063,5468,7153,7272,9700,22911,23122,23671,57731,79598,80206,84079,84260	BUB1B,CENPF,PPARG,TOP2A,TTK,ESPL1,WDR47,CLASP2,TMEFF2,SPTBN4,CEP97,FHOD3,ANKRD27,TCHP	14/341
11_Member	WikiPathways	WP2446	Retinoblastoma gene in cancer	-3.74212	-1.34165	891,1021,5591,6118,7153,7272,8318	CCNB1,CDK6,PRKDC,RPA2,TOP2A,TTK,CDC45	7/90
11_Member	GO Biological Processes	GO:0007346	regulation of mitotic cell cycle	-3.73413	-1.33742	701,891,1021,1063,5017,5591,6118,6790,6868,7272,8883,9700,10011,51149,51720,51776,91754,163786	BUB1B,CCNB1,CDK6,CENPF,OVOL1,PRKDC,RPA2,AURKA,ADAM17,TTK,NAE1,ESPL1,SRA1,MRNIP,UIMC1,MAP3K20,NEK9,SASS6	18/518
11_Member	GO Biological Processes	GO:0007093	mitotic cell cycle checkpoint signaling	-3.6575	-1.28269	701,1063,5591,6118,7272,8883,51149,51720	BUB1B,CENPF,PRKDC,RPA2,TTK,NAE1,MRNIP,UIMC1	8/123
11_Member	KEGG Pathway	hsa04110	Cell cycle	-3.6312	-1.26694	701,891,1021,5591,7272,8318,9700,27127,57082	BUB1B,CCNB1,CDK6,PRKDC,TTK,CDC45,ESPL1,SMC1B,KNL1	9/157
11_Member	GO Biological Processes	GO:0010389	regulation of G2/M transition of mitotic cell cycle	-3.43314	-1.13622	891,1021,1063,6790,8883,51149,51720	CCNB1,CDK6,CENPF,AURKA,NAE1,MRNIP,UIMC1	7/101
11_Member	GO Biological Processes	GO:1901988	negative regulation of cell cycle phase transition	-3.41515	-1.12315	701,1063,5017,5591,6118,7272,8318,8883,51149,51720,51776	BUB1B,CENPF,OVOL1,PRKDC,RPA2,TTK,CDC45,NAE1,MRNIP,UIMC1,MAP3K20	11/243
11_Member	GO Biological Processes	GO:0033044	regulation of chromosome organization	-3.34082	-1.07277	701,891,1063,3184,7153,7272,8607,9700,10575,23049,51776	BUB1B,CCNB1,CENPF,HNRNPD,TOP2A,TTK,RUVBL1,ESPL1,CCT4,SMG1,MAP3K20	11/248
11_Member	GO Biological Processes	GO:0010948	negative regulation of cell cycle process	-3.33589	-1.07062	701,1063,5017,5591,6118,7272,8318,8883,9700,51149,51720,51776	BUB1B,CENPF,OVOL1,PRKDC,RPA2,TTK,CDC45,NAE1,ESPL1,MRNIP,UIMC1,MAP3K20	12/289
11_Member	GO Cellular Components	GO:0000940	outer kinetochore	-3.24133	-1.01821	701,891,1063	BUB1B,CCNB1,CENPF	3/13
11_Member	GO Biological Processes	GO:1902749	regulation of cell cycle G2/M phase transition	-3.16264	-0.97007	891,1021,1063,6790,8883,51149,51720	CCNB1,CDK6,CENPF,AURKA,NAE1,MRNIP,UIMC1	7/112
11_Member	GO Biological Processes	GO:0031570	DNA integrity checkpoint signaling	-3.09451	-0.926743	5591,6118,8318,8883,51149,51720,51776	PRKDC,RPA2,CDC45,NAE1,MRNIP,UIMC1,MAP3K20	7/115
11_Member	GO Biological Processes	GO:0010965	regulation of mitotic sister chromatid separation	-3.01685	-0.869547	701,891,1063,7272,9700	BUB1B,CCNB1,CENPF,TTK,ESPL1	5/58
11_Member	WikiPathways	WP179	Cell cycle	-2.98574	-0.846121	891,1021,5591,7272,8318,9700,27127	CCNB1,CDK6,PRKDC,TTK,CDC45,ESPL1,SMC1B	7/120
11_Member	GO Biological Processes	GO:0030071	regulation of mitotic metaphase/anaphase transition	-2.92721	-0.806483	701,891,1063,7272,9700,51776	BUB1B,CCNB1,CENPF,TTK,ESPL1,MAP3K20	6/90
11_Member	GO Biological Processes	GO:1902099	regulation of metaphase/anaphase transition of cell cycle	-2.8535	-0.767079	701,891,1063,7272,9700,51776	BUB1B,CCNB1,CENPF,TTK,ESPL1,MAP3K20	6/93
11_Member	GO Biological Processes	GO:0045786	negative regulation of cell cycle	-2.81171	-0.749009	701,1021,1063,5017,5591,6118,7272,8318,8883,9700,51149,51720,51776	BUB1B,CDK6,CENPF,OVOL1,PRKDC,RPA2,TTK,CDC45,NAE1,ESPL1,MRNIP,UIMC1,MAP3K20	13/378
11_Member	GO Biological Processes	GO:0051983	regulation of chromosome segregation	-2.76533	-0.720798	701,891,1063,7272,9700,51776,84643	BUB1B,CCNB1,CENPF,TTK,ESPL1,MAP3K20,KIF2B	7/131
11_Member	GO Biological Processes	GO:0033045	regulation of sister chromatid segregation	-2.60635	-0.611417	701,891,1063,7272,9700,51776	BUB1B,CCNB1,CENPF,TTK,ESPL1,MAP3K20	6/104
11_Member	GO Biological Processes	GO:1901991	negative regulation of mitotic cell cycle phase transition	-2.57981	-0.599127	701,1063,5591,6118,7272,8883,51149,51720	BUB1B,CENPF,PRKDC,RPA2,TTK,NAE1,MRNIP,UIMC1	8/180
11_Member	GO Biological Processes	GO:1905818	regulation of chromosome separation	-2.57034	-0.599127	701,891,1063,7272,9700	BUB1B,CCNB1,CENPF,TTK,ESPL1	5/73
11_Member	GO Biological Processes	GO:0045930	negative regulation of mitotic cell cycle	-2.47746	-0.550321	701,1063,5017,5591,6118,7272,8883,51149,51720	BUB1B,CENPF,OVOL1,PRKDC,RPA2,TTK,NAE1,MRNIP,UIMC1	9/229
11_Member	GO Biological Processes	GO:2001251	negative regulation of chromosome organization	-2.46965	-0.546296	701,1063,7153,7272,9700	BUB1B,CENPF,TOP2A,TTK,ESPL1	5/77
11_Member	GO Biological Processes	GO:0007088	regulation of mitotic nuclear division	-2.35332	-0.484464	701,891,1063,6790,7272,9700	BUB1B,CCNB1,CENPF,AURKA,TTK,ESPL1	6/117
11_Member	GO Biological Processes	GO:0044774	mitotic DNA integrity checkpoint signaling	-2.32998	-0.475308	5591,6118,8883,51149,51720	PRKDC,RPA2,NAE1,MRNIP,UIMC1	5/83
11_Member	GO Biological Processes	GO:0033047	regulation of mitotic sister chromatid segregation	-2.29509	-0.45858	701,891,1063,7272	BUB1B,CCNB1,CENPF,TTK	4/53
11_Member	GO Biological Processes	GO:0007094	mitotic spindle assembly checkpoint signaling	-2.20205	-0.423925	701,1063,7272	BUB1B,CENPF,TTK	3/29
11_Member	GO Biological Processes	GO:0071173	spindle assembly checkpoint signaling	-2.20205	-0.423925	701,1063,7272	BUB1B,CENPF,TTK	3/29
11_Member	GO Biological Processes	GO:0071174	mitotic spindle checkpoint signaling	-2.20205	-0.423925	701,1063,7272	BUB1B,CENPF,TTK	3/29
11_Member	GO Biological Processes	GO:0031577	spindle checkpoint signaling	-2.16046	-0.403443	701,1063,7272	BUB1B,CENPF,TTK	3/30
11_Member	GO Biological Processes	GO:0051129	negative regulation of cellular component organization	-2.14816	-0.392	701,1063,5468,7097,7153,7272,9700,10049,10411,22828,22911,23122,23671,57731,79598,80206,84079,84260	BUB1B,CENPF,PPARG,TLR2,TOP2A,TTK,ESPL1,DNAJB6,RAPGEF3,SCAF8,WDR47,CLASP2,TMEFF2,SPTBN4,CEP97,FHOD3,ANKRD27,TCHP	18/721
11_Member	GO Biological Processes	GO:0034502	protein localization to chromosome	-2.10366	-0.361824	701,6118,7272,51149,57082	BUB1B,RPA2,TTK,MRNIP,KNL1	5/94
11_Member	GO Biological Processes	GO:0033046	negative regulation of sister chromatid segregation	-2.08184	-0.348255	701,1063,7272	BUB1B,CENPF,TTK	3/32
11_Member	GO Biological Processes	GO:0033048	negative regulation of mitotic sister chromatid segregation	-2.08184	-0.348255	701,1063,7272	BUB1B,CENPF,TTK	3/32
11_Member	GO Biological Processes	GO:0045841	negative regulation of mitotic metaphase/anaphase transition	-2.08184	-0.348255	701,1063,7272	BUB1B,CENPF,TTK	3/32
11_Member	GO Biological Processes	GO:2000816	negative regulation of mitotic sister chromatid separation	-2.08184	-0.348255	701,1063,7272	BUB1B,CENPF,TTK	3/32
11_Member	GO Biological Processes	GO:0051985	negative regulation of chromosome segregation	-2.00865	-0.301875	701,1063,7272	BUB1B,CENPF,TTK	3/34
11_Member	GO Biological Processes	GO:1902100	negative regulation of metaphase/anaphase transition of cell cycle	-2.00865	-0.301875	701,1063,7272	BUB1B,CENPF,TTK	3/34
11_Member	GO Biological Processes	GO:1905819	negative regulation of chromosome separation	-2.00865	-0.301875	701,1063,7272	BUB1B,CENPF,TTK	3/34
11_Member	WikiPathways	WP45	G1 to S cell cycle control	-2.00717	-0.301875	891,1021,6118,8318	CCNB1,CDK6,RPA2,CDC45	4/64
12_Summary	GO Cellular Components	GO:0005814	centriole	-5.12598	-2.31802	3796,6790,7153,8924,11190,22995,79598,137392,159989,163786,374666,23122,117178	KIF2A,AURKA,TOP2A,HERC2,CEP250,CEP152,CEP97,CIBAR1,DEUP1,SASS6,WASH3P,CLASP2,SSX2IP	13/-
12_Member	GO Cellular Components	GO:0005814	centriole	-5.12598	-2.31802	3796,6790,7153,8924,11190,22995,79598,137392,159989,163786,374666	KIF2A,AURKA,TOP2A,HERC2,CEP250,CEP152,CEP97,CIBAR1,DEUP1,SASS6,WASH3P	11/157
12_Member	GO Cellular Components	GO:0098536	deuterosome	-4.66387	-1.95858	22995,159989,163786	CEP152,DEUP1,SASS6	3/5
12_Member	GO Biological Processes	GO:0031023	microtubule organizing center organization	-3.28135	-1.03987	6790,11190,22995,23122,117178,159989,163786	AURKA,CEP250,CEP152,CLASP2,SSX2IP,DEUP1,SASS6	7/107
12_Member	GO Biological Processes	GO:0007098	centrosome cycle	-2.92721	-0.806483	6790,11190,22995,117178,159989,163786	AURKA,CEP250,CEP152,SSX2IP,DEUP1,SASS6	6/90
12_Member	GO Biological Processes	GO:0007099	centriole replication	-2.49151	-0.557972	22995,159989,163786	CEP152,DEUP1,SASS6	3/23
12_Member	GO Biological Processes	GO:0098534	centriole assembly	-2.20205	-0.423925	22995,159989,163786	CEP152,DEUP1,SASS6	3/29
13_Summary	GO Biological Processes	GO:0097150	neuronal stem cell population maintenance	-4.9884	-2.18999	1000,5629,22911,51593,259266,2103,23569,26147,471,1021,10579,50937,55236,79633,220,8925,1063,3184,3688,5591,7360,10058,54768,57453,79625	CDH2,PROX1,WDR47,SRRT,ASPM,ESRRB,PADI4,PHF19,ATIC,CDK6,TACC2,CDON,UBA6,FAT4,ALDH1A3,HERC1,CENPF,HNRNPD,ITGB1,PRKDC,UGP2,ABCB6,HYDIN,DSCAML1,NDNF	25/-
13_Member	GO Biological Processes	GO:0097150	neuronal stem cell population maintenance	-4.9884	-2.18999	1000,5629,22911,51593,259266	CDH2,PROX1,WDR47,SRRT,ASPM	5/23
13_Member	GO Biological Processes	GO:0019827	stem cell population maintenance	-3.88557	-1.4102	1000,2103,5629,22911,23569,26147,51593,259266	CDH2,ESRRB,PROX1,WDR47,PADI4,PHF19,SRRT,ASPM	8/114
13_Member	GO Biological Processes	GO:0098727	maintenance of cell number	-3.78157	-1.34165	1000,2103,5629,22911,23569,26147,51593,259266	CDH2,ESRRB,PROX1,WDR47,PADI4,PHF19,SRRT,ASPM	8/118
13_Member	GO Biological Processes	GO:0021543	pallium development	-3.6703	-1.28468	471,1000,1021,5629,10579,22911,50937,55236,79633,259266	ATIC,CDH2,CDK6,PROX1,TACC2,WDR47,CDON,UBA6,FAT4,ASPM	10/190
13_Member	GO Biological Processes	GO:0021537	telencephalon development	-3.51519	-1.18514	220,471,1000,1021,5629,8925,10579,22911,50937,55236,79633,259266	ALDH1A3,ATIC,CDH2,CDK6,PROX1,HERC1,TACC2,WDR47,CDON,UBA6,FAT4,ASPM	12/276
13_Member	GO Biological Processes	GO:0021987	cerebral cortex development	-2.84267	-0.761717	471,1000,10579,22911,50937,79633,259266	ATIC,CDH2,TACC2,WDR47,CDON,FAT4,ASPM	7/127
13_Member	GO Biological Processes	GO:0007420	brain development	-2.75614	-0.716579	220,471,1000,1021,1063,3184,3688,5591,5629,7360,8925,10058,10579,22911,50937,54768,55236,57453,79625,79633,259266	ALDH1A3,ATIC,CDH2,CDK6,CENPF,HNRNPD,ITGB1,PRKDC,PROX1,UGP2,HERC1,ABCB6,TACC2,WDR47,CDON,HYDIN,UBA6,DSCAML1,NDNF,FAT4,ASPM	21/787
13_Member	GO Biological Processes	GO:0030900	forebrain development	-2.56087	-0.593859	220,471,1000,1021,5629,8925,10579,22911,50937,55236,79625,79633,259266	ALDH1A3,ATIC,CDH2,CDK6,PROX1,HERC1,TACC2,WDR47,CDON,UBA6,NDNF,FAT4,ASPM	13/404
14_Summary	Reactome Gene Sets	R-HSA-69275	G2/M Transition	-4.9392	-2.15013	891,1063,1778,3320,4605,5691,5707,5714,5719,6790,11190,22995,79598	CCNB1,CENPF,DYNC1H1,HSP90AA1,MYBL2,PSMB3,PSMD1,PSMD8,PSMD13,AURKA,CEP250,CEP152,CEP97	13/-
14_Member	Reactome Gene Sets	R-HSA-69275	G2/M Transition	-4.9392	-2.15013	891,1063,1778,3320,4605,5691,5707,5714,5719,6790,11190,22995	CCNB1,CENPF,DYNC1H1,HSP90AA1,MYBL2,PSMB3,PSMD1,PSMD8,PSMD13,AURKA,CEP250,CEP152	12/196
14_Member	Reactome Gene Sets	R-HSA-453274	Mitotic G2-G2/M phases	-4.89487	-2.11495	891,1063,1778,3320,4605,5691,5707,5714,5719,6790,11190,22995	CCNB1,CENPF,DYNC1H1,HSP90AA1,MYBL2,PSMB3,PSMD1,PSMD8,PSMD13,AURKA,CEP250,CEP152	12/198
14_Member	Reactome Gene Sets	R-HSA-2565942	Regulation of PLK1 Activity at G2/M Transition	-2.97803	-0.843199	891,1778,3320,6790,11190,22995	CCNB1,DYNC1H1,HSP90AA1,AURKA,CEP250,CEP152	6/88
14_Member	Reactome Gene Sets	R-HSA-8854518	AURKA Activation by TPX2	-2.57034	-0.599127	1778,3320,6790,11190,22995	DYNC1H1,HSP90AA1,AURKA,CEP250,CEP152	5/73
14_Member	Reactome Gene Sets	R-HSA-5620912	Anchoring of the basal body to the plasma membrane	-2.02946	-0.30865	1778,3320,11190,22995,79598	DYNC1H1,HSP90AA1,CEP250,CEP152,CEP97	5/98
15_Summary	GO Biological Processes	GO:0030866	cortical actin cytoskeleton organization	-4.77351	-2.03198	5339,6242,29127,80206,85369,114793,10112,81624,399693,288,9700	PLEC,RTKN,RACGAP1,FHOD3,STRIP1,FMNL2,KIF20A,DIAPH3,CCDC187,ANK3,ESPL1	11/-
15_Member	GO Biological Processes	GO:0030866	cortical actin cytoskeleton organization	-4.77351	-2.03198	5339,6242,29127,80206,85369,114793	PLEC,RTKN,RACGAP1,FHOD3,STRIP1,FMNL2	6/42
15_Member	GO Biological Processes	GO:0030865	cortical cytoskeleton organization	-4.33038	-1.72027	5339,6242,29127,80206,85369,114793	PLEC,RTKN,RACGAP1,FHOD3,STRIP1,FMNL2	6/50
15_Member	GO Biological Processes	GO:0000912	assembly of actomyosin apparatus involved in cytokinesis	-3.92839	-1.4357	5339,6242,29127	PLEC,RTKN,RACGAP1	3/8
15_Member	GO Biological Processes	GO:0000915	actomyosin contractile ring assembly	-3.92839	-1.4357	5339,6242,29127	PLEC,RTKN,RACGAP1	3/8
15_Member	GO Biological Processes	GO:0044837	actomyosin contractile ring organization	-3.75653	-1.34165	5339,6242,29127	PLEC,RTKN,RACGAP1	3/9
15_Member	GO Biological Processes	GO:0032506	cytokinetic process	-2.74316	-0.710131	5339,6242,10112,29127	PLEC,RTKN,KIF20A,RACGAP1	4/40
15_Member	Reactome Gene Sets	R-HSA-9013106	RHOC GTPase cycle	-2.54455	-0.589885	6242,29127,81624,114793,399693	RTKN,RACGAP1,DIAPH3,FMNL2,CCDC187	5/74
15_Member	GO Biological Processes	GO:0061640	cytoskeleton-dependent cytokinesis	-2.46544	-0.544602	288,5339,6242,9700,10112,29127	ANK3,PLEC,RTKN,ESPL1,KIF20A,RACGAP1	6/111
15_Member	GO Biological Processes	GO:0000910	cytokinesis	-2.42723	-0.525966	288,5339,6242,9700,10112,29127	ANK3,PLEC,RTKN,ESPL1,KIF20A,RACGAP1	6/113
15_Member	GO Biological Processes	GO:0000281	mitotic cytokinesis	-2.35238	-0.484464	288,6242,9700,10112,29127	ANK3,RTKN,ESPL1,KIF20A,RACGAP1	5/82
16_Summary	WikiPathways	WP2361	Gastric cancer network 1	-4.54623	-1.86322	1063,4605,6790,7153,8607,200424,891	CENPF,MYBL2,AURKA,TOP2A,RUVBL1,TET3,CCNB1	7/-
16_Member	WikiPathways	WP2361	Gastric cancer network 1	-4.54623	-1.86322	1063,4605,6790,7153,8607	CENPF,MYBL2,AURKA,TOP2A,RUVBL1	5/28
16_Member	GO Cellular Components	GO:0045120	pronucleus	-3.14081	-0.962943	1063,6790,200424	CENPF,AURKA,TET3	3/14
16_Member	Reactome Gene Sets	R-HSA-156711	Polo-like kinase mediated events	-2.96215	-0.833417	891,1063,4605	CCNB1,CENPF,MYBL2	3/16
17_Summary	CORUM	CORUM:1183	CDC5L complex	-4.39419	-1.7392	1778,5591,6626,7153,22828	DYNC1H1,PRKDC,SNRPA,TOP2A,SCAF8	5/-
17_Member	CORUM	CORUM:1183	CDC5L complex	-4.39419	-1.7392	1778,5591,6626,7153,22828	DYNC1H1,PRKDC,SNRPA,TOP2A,SCAF8	5/30
18_Summary	GO Cellular Components	GO:0099513	polymeric cytoskeletal fiber	-4.38708	-1.73883	667,1778,3796,3831,4001,5339,6790,8661,10112,10575,22911,23122,23336,23499,29127,54627,57731,81624,83481,83593,84260,84643,94137,259266,285331,9732,81704,81928,139818,226,1063,9940,374666,399693,160,2,2993,3688,7273,10411,160851	DST,DYNC1H1,KIF2A,KLC1,LMNB1,PLEC,AURKA,EIF3A,KIF20A,CCT4,WDR47,CLASP2,SYNM,MACF1,RACGAP1,MAP10,SPTBN4,DIAPH3,EPPK1,RASSF5,TCHP,KIF2B,RP1L1,ASPM,CCDC66,DOCK4,DOCK8,CABLES2,DOCK11,ALDOA,CENPF,DLEC1,WASH3P,CCDC187,AP2A1,A2M,GYPA,ITGB1,TTN,RAPGEF3,DGKH	41/-
18_Member	GO Cellular Components	GO:0099513	polymeric cytoskeletal fiber	-4.38708	-1.73883	667,1778,3796,3831,4001,5339,6790,8661,10112,10575,22911,23122,23336,23499,29127,54627,57731,81624,83481,83593,84260,84643,94137,259266,285331	DST,DYNC1H1,KIF2A,KLC1,LMNB1,PLEC,AURKA,EIF3A,KIF20A,CCT4,WDR47,CLASP2,SYNM,MACF1,RACGAP1,MAP10,SPTBN4,DIAPH3,EPPK1,RASSF5,TCHP,KIF2B,RP1L1,ASPM,CCDC66	25/780
18_Member	GO Cellular Components	GO:0005874	microtubule	-4.30916	-1.71132	667,1778,3796,3831,6790,8661,10112,10575,22911,23122,23499,29127,54627,83593,84643,94137,259266,285331	DST,DYNC1H1,KIF2A,KLC1,AURKA,EIF3A,KIF20A,CCT4,WDR47,CLASP2,MACF1,RACGAP1,MAP10,RASSF5,KIF2B,RP1L1,ASPM,CCDC66	18/466
18_Member	Reactome Gene Sets	R-HSA-983231	Factors involved in megakaryocyte development and platelet production	-3.41406	-1.12315	3796,3831,9732,10112,29127,81704,81928,84643,139818	KIF2A,KLC1,DOCK4,KIF20A,RACGAP1,DOCK8,CABLES2,KIF2B,DOCK11	9/168
18_Member	GO Molecular Functions	GO:0015631	tubulin binding	-3.30842	-1.05408	226,667,1063,3796,9940,10112,23122,23499,29127,54627,84643,285331,374666,399693	ALDOA,DST,CENPF,KIF2A,DLEC1,KIF20A,CLASP2,MACF1,RACGAP1,MAP10,KIF2B,CCDC66,WASH3P,CCDC187	14/377
18_Member	GO Molecular Functions	GO:0008017	microtubule binding	-3.0236	-0.874183	667,1063,3796,10112,23122,23499,29127,54627,84643,285331,399693	DST,CENPF,KIF2A,KIF20A,CLASP2,MACF1,RACGAP1,MAP10,KIF2B,CCDC66,CCDC187	11/271
18_Member	Reactome Gene Sets	R-HSA-983189	Kinesins	-2.98301	-0.846121	3796,3831,10112,29127,84643	KIF2A,KLC1,KIF20A,RACGAP1,KIF2B	5/59
18_Member	Reactome Gene Sets	R-HSA-2132295	MHC class II antigen presentation	-2.92317	-0.804428	160,1778,3796,3831,10112,29127,84643	AP2A1,DYNC1H1,KIF2A,KLC1,KIF20A,RACGAP1,KIF2B	7/123
18_Member	GO Cellular Components	GO:0005871	kinesin complex	-2.48383	-0.553964	3796,3831,10112,84643	KIF2A,KLC1,KIF20A,KIF2B	4/47
18_Member	Reactome Gene Sets	R-HSA-109582	Hemostasis	-2.08797	-0.34959	2,226,2993,3688,3796,3831,7273,9732,10112,10411,29127,81704,81928,84643,139818,160851	A2M,ALDOA,GYPA,ITGB1,KIF2A,KLC1,TTN,DOCK4,KIF20A,RAPGEF3,RACGAP1,DOCK8,CABLES2,KIF2B,DOCK11,DGKH	16/621
18_Member	Reactome Gene Sets	R-HSA-8856688	Golgi-to-ER retrograde transport	-2.0873	-0.34959	1778,3796,3831,10112,29127,84643	DYNC1H1,KIF2A,KLC1,KIF20A,RACGAP1,KIF2B	6/133
18_Member	Reactome Gene Sets	R-HSA-6811434	COPI-dependent Golgi-to-ER retrograde traffic	-2.0115	-0.301875	3796,3831,10112,29127,84643	KIF2A,KLC1,KIF20A,RACGAP1,KIF2B	5/99
19_Summary	GO Biological Processes	GO:0043696	dedifferentiation	-4.36708	-1.73439	1021,2103,3184,5591,5610,10443,8621,2874	CDK6,ESRRB,HNRNPD,PRKDC,EIF2AK2,N4BP2L2,CDK13,GPS2	8/-
19_Member	GO Biological Processes	GO:0043696	dedifferentiation	-4.36708	-1.73439	1021,2103,3184	CDK6,ESRRB,HNRNPD	3/6
19_Member	GO Biological Processes	GO:0043697	cell dedifferentiation	-4.36708	-1.73439	1021,2103,3184	CDK6,ESRRB,HNRNPD	3/6
19_Member	GO Biological Processes	GO:1902036	regulation of hematopoietic stem cell differentiation	-4.22468	-1.65	1021,5591,5610,10443	CDK6,PRKDC,EIF2AK2,N4BP2L2	4/17
19_Member	GO Biological Processes	GO:2000736	regulation of stem cell differentiation	-3.2254	-1.00975	1021,2103,5591,5610,8621,10443	CDK6,ESRRB,PRKDC,EIF2AK2,CDK13,N4BP2L2	6/79
19_Member	GO Biological Processes	GO:1901532	regulation of hematopoietic progenitor cell differentiation	-2.74316	-0.710131	1021,5591,5610,10443	CDK6,PRKDC,EIF2AK2,N4BP2L2	4/40
19_Member	GO Biological Processes	GO:2000737	negative regulation of stem cell differentiation	-2.29034	-0.45858	2103,8621,10443	ESRRB,CDK13,N4BP2L2	3/27
19_Member	GO Molecular Functions	GO:0030332	cyclin binding	-2.00865	-0.301875	1021,2874,8621	CDK6,GPS2,CDK13	3/34
20_Summary	GO Cellular Components	GO:0031252	cell leading edge	-4.29982	-1.70788	208,667,1000,1021,2064,2567,3688,6868,7442,10109,10411,23122,23150,23499,81704,117178,374666,3320,5824,64399,140803	AKT2,DST,CDH2,CDK6,ERBB2,GABRG3,ITGB1,ADAM17,TRPV1,ARPC2,RAPGEF3,CLASP2,FRMD4B,MACF1,DOCK8,SSX2IP,WASH3P,HSP90AA1,PEX19,HHIP,TRPM6	21/-
20_Member	GO Cellular Components	GO:0031252	cell leading edge	-4.29982	-1.70788	208,667,1000,1021,2064,2567,3688,6868,7442,10109,10411,23122,23150,23499,81704,117178,374666	AKT2,DST,CDH2,CDK6,ERBB2,GABRG3,ITGB1,ADAM17,TRPV1,ARPC2,RAPGEF3,CLASP2,FRMD4B,MACF1,DOCK8,SSX2IP,WASH3P	17/424
20_Member	GO Cellular Components	GO:0031253	cell projection membrane	-3.58157	-1.23099	208,2064,2567,3320,3688,5824,6868,7442,10109,23122,23499,64399,81704,140803	AKT2,ERBB2,GABRG3,HSP90AA1,ITGB1,PEX19,ADAM17,TRPV1,ARPC2,CLASP2,MACF1,HHIP,DOCK8,TRPM6	14/354
20_Member	GO Cellular Components	GO:0031256	leading edge membrane	-3.17991	-0.97881	208,2064,2567,3688,6868,7442,23122,23499,81704	AKT2,ERBB2,GABRG3,ITGB1,ADAM17,TRPV1,CLASP2,MACF1,DOCK8	9/181
20_Member	GO Cellular Components	GO:0032587	ruffle membrane	-2.67043	-0.657781	208,2064,3688,6868,23122,23499	AKT2,ERBB2,ITGB1,ADAM17,CLASP2,MACF1	6/101
20_Member	GO Cellular Components	GO:0001726	ruffle	-2.56503	-0.596622	208,1021,2064,3688,6868,23122,23150,23499	AKT2,CDK6,ERBB2,ITGB1,ADAM17,CLASP2,FRMD4B,MACF1	8/181
