# Supplementary material for: Deciphering the endogenous SUMO-1 landscape: a novel combinatorial peptide enrichment strategy for global profiling and disease association
Source: Royal Society of Chemistry journal article supplement (doi:10.1039/d4sc07379g), 2024-12-26
Supplement: d4sc07379g4.xlsx [file d4sc07379g4.xlsx]

## Sheet: Impens, 2014-Sites
Uniprot	Gene	Position
Q15029	EFTUD2	64
O00232	PSMD12	92
O43242	PSMD3	38
P08708	RPS17	103
P15880	RPS2	275
P23396	RPS3	230
P05388	RPLP0	297
P62906	RPL10A	118
P26373	RPL13	174
P84098	RPL19	181
P39023	RPL3	294
P36578	RPL4	364
P46777	RPL5	220
P11021	HSPA5	352
P11021	HSPA5	353
P60709	ACTB	61
P60709	ACTB	113
P60709	ACTB	326
P60709	ACTB	328
Q9NQW6	ANLN	254
P53999	SUB1	68
O95433	AHSA1	182
P30566	ADSL	415
Q01518	CAP1	348
Q6IQ32	ADNP2	1032
Q02952	AKAP12	1051
Q02040	AKAP17A	118
Q9Y2D5	AKAP2	174
Q12904	AIMP1	137
P04083	ANXA1	214
P04083	ANXA1	332
P07355	ANXA2	49
P07355	ANXA2	324
P08758	ANXA5	29
P46013	MKI67	1093
P46013	MKI67	2009
P46013	MKI67	2492
P46013	MKI67	2613
P46013	MKI67	2734
P46013	MKI67	2852
Q9UKV3	ACIN1	268
Q9UKV3	ACIN1	315
Q7L4I2	RSRC2	375
Q9NUU7	DDX19A	26
O95817	BAG3	445
Q9NYF8	BCLAF1	580
Q9NYF8	BCLAF1	831
Q5T5X7	BEND3	20
P80723	BASP1	143
Q9H6U6	BCAS3	215
O60885	BRD4	1111
Q9H0E9	BRD8	481
Q9NXV6	CDKN2AIP	184
Q8IX12	CCAR1	1012
Q13111	CHAF1A	182
Q9HAF1	MEAF6	113
Q12873	CHD3	721
O14503	BHLHE40	279
Q96JG6	CCDC132	963
Q96MW1	CCDC43	95
O43175	PHGDH	21
P18887	XRCC1	176
P11387	TOP1	117
P11388	TOP2A	1240
O15446	CD3EAP	270
O15446	CD3EAP	314
Q9NVU0	POLR3E	498
P55265	ADAR	418
P49792	RANBP2	1414
P49792	RANBP2	2594
P49792	RANBP2	2792
Q9UPN9	TRIM33	776
Q6PJG2	ELMSAN1	590
P68104	EEF1A1	392
P26641	EEF1G	253
P13639	EEF2	239
Q14244	MAP7	406
Q06265	EXOSC9	297
Q01780	EXOSC10	583
Q92945	KHSRP	121
P09038	FGF2	228
P21333	FLNA	299
Q8N3X1	FNBP4	301
Q8N3X1	FNBP4	348
Q8N3X1	FNBP4	519
P15408	FOSL2	222
P04075	ALDOA	42
Q16666	IFI16	561
Q9Y5B6	PAXBP1	149
P78347	GTF2I	221
P78347	GTF2I	991
Q9UKD1	GMEB2	155
P04150	NR3C1	293
Q9NVN8	GNL3L	477
Q9NX24	NHP2	5
O60832	DKC1	413
P11142	HSPA8	512
P07900	HSP90AA1	407
P51858	HDGF	80
P61978	HNRNPK	34
P61978	HNRNPK	163
P61978	HNRNPK	422
P52272	HNRNPM	698
Q00839	HNRNPU	265
Q9BUJ2	HNRNPUL1	117
Q9BUJ2	HNRNPUL1	142
P07910	HNRNPC	232
P82970	HMGN5	101
Q9H9B1	EHMT1	22
Q15047	SETDB1	1032
Q6NT76	HMBOX1	413
Q16543	CDC37	132
P00492	HPRT1	115
Q96HW7	INTS4	791
P05556	ITGB1	794
Q12906	ILF3	348
Q04695	KRT17	15
Q04695	KRT17	399
Q04695	KRT17	400
Q04695	KRT17	419
P05783	KRT18	426
P78386	KRT85	229
P05787	KRT8	101
P05787	KRT8	197
P05787	KRT8	472
Q07666	KHDRBS1	102
Q969R5	L3MBTL2	700
Q32MZ4	LRRFIP1	305
Q93052	LPP	327
O95232	LUC7L3	424
Q14676	MDC1	616
Q14676	MDC1	1413
O43513	MED7	185
P27816	MAP4	269
Q9BYG3	MKI67IP	271
Q9ULH7	MKL2	628
Q13765	NACA	100
P18615	NELFE	78
P48681	NES	811
Q09666	AHNAK	134
Q09666	AHNAK	961
P30414	NKTR	1177
P49321	NASP	736
Q16649	NFIL3	219
O94916	NFAT5	556
Q6P4R8	NFRKB	488
Q14980	NUMA1	1766
O75376	NCOR1	1106
Q14978	NOLC1	193
Q14978	NOLC1	415
Q14978	NOLC1	572
Q14978	NOLC1	663
Q9Y2X3	NOP58	467
Q9NR30	DDX21	116
P19338	NCL	297
P19338	NCL	324
P19338	NCL	589
P06748	NPM1	32
P06748	NPM1	248
P06748	NPM1	257
P06748	NPM1	267
Q96RE7	NACC1	167
Q9NP74	PALMD	179
Q96HC4	PDLIM5	89
Q02790	FKBP4	441
O60664	PLIN3	122
Q06830	PRDX1	185
O00541	PES1	517
Q8WWQ0	PHIP	1470
P15259	PGAM2	100
Q9H307	PNN	157
Q8NC51	SERBP1	52
Q8NC51	SERBP1	228
P09874	PARP1	203
P09874	PARP1	486
P09874	PARP1	748
Q6NZI2	PTRF	161
O15212	PFDN6	66
P02545	LMNA	597
Q6UN15	FIP1L1	123
Q92841	DDX17	129
P17844	DDX5	53
Q7Z333	SETX	339
Q5VYK3	KIAA0368	1039
Q1ED39	KNOP1	246
Q1ED39	KNOP1	249
Q96E09	FAM122A	89
Q86U86	PBRM1	1293
Q14690	PDCD11	1030
Q99590	SCAF11	676
O95785	WIZ	1523
O60361	NME2P1	85
O60361	NME2P1	109
P46087	NOP2	615
P14618	PKM	166
P46060	RANGAP1	524
P43487	RANBP1	190
Q92766	RREB1	615
Q96T23	RSF1	277
Q96T23	RSF1	294
Q96T23	RSF1	456
Q7Z5J4	RAI1	819
Q7Z5J4	RAI1	901
P52565	ARHGDIA	138
P52565	ARHGDIA	141
Q14692	BMS1	810
Q9GZL7	WDR12	239
Q9P2E9	RRBP1	620
P38159	RBMX	63
Q5T8P6	RBM26	106
Q5JTH9	RRP12	71
Q9Y3B9	RRP15	239
Q9Y265	RUVBL1	225
Q8N5C6	SRBD1	185
Q15424	SAFB	381
Q15424	SAFB	578
Q14151	SAFB2	65
Q14151	SAFB2	225
Q14151	SAFB2	230
Q14151	SAFB2	293
O14828	SCAMP3	313
Q8IYB3	SRRM1	231
Q13523	PRPF4B	117
O76094	SRP72	391
P42224	STAT1	703
Q8TAD8	SNIP1	30
P61956	SUMO2	11
P63208	SKP1	142
O75533	SF3B1	413
Q13435	SF3B2	280
Q14247	CTTN	144
Q14247	CTTN	181
P31948	STIP1	123
P31948	STIP1	210
Q9UBT2	UBA2	164
Q9UBT2	UBA2	420
P63279	UBE2I	49
Q9Y2Z0	SUGT1	295
Q969G3	SMARCE1	92
Q92797	SYMPK	361
Q92797	SYMPK	1239
P50990	CCT8	459
Q96FV9	THOC1	595
Q9Y2W1	THRAP3	202
Q9Y2W1	THRAP3	387
Q9Y2W1	THRAP3	451
Q9UGU0	TCF20	929
Q9UH73	EBF1	16
P17275	JUNB	240
Q02447	SP3	551
O15164	TRIM24	723
O15164	TRIM24	741
Q13263	TRIM28	377
Q13263	TRIM28	469
Q13263	TRIM28	750
Q13263	TRIM28	779
P46100	ATRX	623
P46100	ATRX	1982
Q13428	TCOF1	755
P60174	TPI1	179
Q9NYL9	TMOD3	169
P68363	TUBA1B	326
Q12888	TP53BP1	217
Q12888	TP53BP1	868
Q12888	TP53BP1	1434
Q12888	TP53BP1	1563
Q6IBS0	TWF2	163
Q9UIG0	BAZ1B	826
O43290	SART1	141
P61086	UBE2K	14
O43795	MYO1B	287
O95292	VAPB	147
P08670	VIM	445
O75717	WDHD1	1127
Q15061	WDR43	309
Q15061	WDR43	384
Q9ULM3	YEATS2	1110
P49750	YLPM1	788
P49750	YLPM1	858
Q9HC78	ZBTB20	330
O95365	ZBTB7A	539
Q96C00	ZBTB9	286
Q5VZL5	ZMYM4	250
Q9UQR1	ZNF148	356
P17028	ZNF24	27
Q9ULJ3	ZBTB21	40
Q9ULJ3	ZBTB21	879
P59923	ZNF445	28
Q9Y4E5	ZNF451	706
Q96JM2	ZNF462	20
Q9H582	ZNF644	346
Q2TB10	ZNF800	409
Q17R98	ZNF827	673
Q9UHF7	TRPS1	766
Q9UHF7	TRPS1	1201

## Sheet: Impens, 2014-Proteins
Gene	Kinase	TF
EFTUD2	no	no
PSMD12	no	no
PSMD3	no	no
RPS17	no	no
RPS2	no	no
RPS3	no	no
RPLP0	no	no
RPL10A	no	no
RPL13	no	no
RPL19	no	no
RPL3	no	no
RPL4	no	no
RPL5	no	no
HSPA5	no	no
ACTB	no	no
ANLN	no	no
SUB1	no	no
AHSA1	no	no
ADSL	no	no
CAP1	no	no
ADNP2	no	no
AKAP12	no	no
AKAP17A	no	no
AKAP2	no	no
AIMP1	no	no
ANXA1	no	no
ANXA2	no	no
ANXA5	no	no
MKI67	no	no
ACIN1	no	no
RSRC2	no	no
DDX19A	no	no
BAG3	no	no
BCLAF1	no	no
BEND3	no	no
BASP1	no	no
BCAS3	no	no
BRD4	yes	no
BRD8	no	no
CDKN2AIP	no	no
CCAR1	no	no
CHAF1A	no	no
MEAF6	no	no
CHD3	no	no
BHLHE40	no	no
CCDC132	no	no
CCDC43	no	no
PHGDH	no	no
XRCC1	no	no
TOP1	no	no
TOP2A	no	no
CD3EAP	no	no
POLR3E	no	no
ADAR	no	no
RANBP2	no	no
TRIM33	no	no
ELMSAN1	no	no
EEF1A1	no	no
EEF1G	no	no
EEF2	no	no
MAP7	no	no
EXOSC9	no	no
EXOSC10	no	no
KHSRP	no	yes
FGF2	no	no
FLNA	no	no
FNBP4	no	no
FOSL2	no	yes
ALDOA	no	no
IFI16	no	yes
PAXBP1	no	no
GTF2I	no	yes
GMEB2	no	no
NR3C1	no	yes
GNL3L	no	no
NHP2	no	no
DKC1	no	no
HSPA8	no	no
HSP90AA1	no	no
HDGF	no	yes
HNRNPK	no	no
HNRNPM	no	no
HNRNPU	no	no
HNRNPUL1	no	no
HNRNPC	no	no
HMGN5	no	no
EHMT1	no	no
SETDB1	no	no
HMBOX1	no	no
CDC37	no	no
HPRT1	no	no
INTS4	no	no
ITGB1	no	no
ILF3	no	yes
KRT17	no	no
KRT18	no	no
KRT85	no	no
KRT8	no	no
KHDRBS1	no	yes
L3MBTL2	no	no
LRRFIP1	no	yes
LPP	no	no
LUC7L3	no	no
MDC1	no	no
MED7	no	no
MAP4	no	no
MKI67IP	no	no
MKL2	no	no
NACA	no	no
NELFE	no	no
NES	no	no
AHNAK	no	no
NKTR	no	no
NASP	no	no
NFIL3	no	yes
NFAT5	no	yes
NFRKB	no	yes
NUMA1	no	no
NCOR1	no	yes
NOLC1	no	no
NOP58	no	no
DDX21	no	no
NCL	no	no
NPM1	no	yes
NACC1	no	no
PALMD	no	no
PDLIM5	no	no
FKBP4	no	no
PLIN3	no	no
PRDX1	no	no
PES1	no	no
PHIP	no	no
PGAM2	no	no
PNN	no	no
SERBP1	no	no
PARP1	no	yes
PTRF	no	no
PFDN6	no	no
LMNA	no	no
FIP1L1	no	no
DDX17	no	no
DDX5	no	yes
SETX	no	no
KIAA0368	no	no
KNOP1	no	no
FAM122A	no	no
PBRM1	no	no
PDCD11	no	yes
SCAF11	no	no
WIZ	no	no
NME2P1	no	no
NOP2	no	no
PKM	no	no
RANGAP1	no	no
RANBP1	no	no
RREB1	no	yes
RSF1	no	no
RAI1	no	no
ARHGDIA	no	no
BMS1	no	no
WDR12	no	no
RRBP1	no	no
RBMX	no	yes
RBM26	no	no
RRP12	no	no
RRP15	no	no
RUVBL1	no	yes
SRBD1	no	no
SAFB	no	no
SAFB2	no	no
SCAMP3	no	no
SRRM1	no	no
PRPF4B	no	no
SRP72	no	no
STAT1	no	yes
SNIP1	no	yes
SUMO2	no	no
SKP1	no	no
SF3B1	no	no
SF3B2	no	no
CTTN	no	no
STIP1	no	no
UBA2	no	no
UBE2I	no	no
SUGT1	no	no
SMARCE1	no	no
SYMPK	no	no
CCT8	no	no
THOC1	no	no
THRAP3	no	no
TCF20	no	no
EBF1	no	yes
JUNB	no	yes
SP3	no	yes
TRIM24	no	no
TRIM28	no	yes
ATRX	no	yes
TCOF1	no	no
TPI1	no	no
TMOD3	no	no
TUBA1B	no	no
TP53BP1	no	yes
TWF2	no	no
BAZ1B	no	no
SART1	yes	no
UBE2K	no	no
MYO1B	no	no
VAPB	no	no
VIM	no	no
WDHD1	no	no
WDR43	no	no
YEATS2	no	no
YLPM1	no	no
ZBTB20	no	no
ZBTB7A	no	yes
ZBTB9	no	no
ZMYM4	no	no
ZNF148	no	yes
ZNF24	no	yes
ZBTB21	no	no
ZNF445	no	no
ZNF451	no	no
ZNF462	no	no
ZNF644	no	no
ZNF800	no	no
ZNF827	no	no
TRPS1	no	yes

## Sheet: Cellular Component_Impens
Gene	Uniprot	Gene Ontology (cellular component)
NACA	E9PAV3	cytoplasm [GO:0005737]; nascent polypeptide-associated complex [GO:0005854]; nucleus [GO:0005634]
PSMD12	O00232	cytoplasm [GO:0005737]; cytosol [GO:0005829]; extracellular exosome [GO:0070062]; extracellular region [GO:0005576]; ficolin-1-rich granule lumen [GO:1904813]; membrane [GO:0016020]; nucleoplasm [GO:0005654]; proteasome accessory complex [GO:0022624]; proteasome complex [GO:0000502]; proteasome regulatory particle [GO:0005838]; proteasome regulatory particle, lid subcomplex [GO:0008541]; secretor…
PES1	O00541	chromosome [GO:0005694]; cytosol [GO:0005829]; membrane [GO:0016020]; nucleolus [GO:0005730]; nucleoplasm [GO:0005654]; PeBoW complex [GO:0070545]; preribosome, large subunit precursor [GO:0030687]
BHLHE40	O14503	chromatin [GO:0000785]; cytoplasm [GO:0005737]; nuclear body [GO:0016604]; nucleus [GO:0005634]
SCAMP3	O14828	extracellular exosome [GO:0070062]; intracellular membrane-bounded organelle [GO:0043231]; recycling endosome membrane [GO:0055038]; trans-Golgi network membrane [GO:0032588]
TRIM24	O15164	cytosol [GO:0005829]; euchromatin [GO:0000791]; male germ cell nucleus [GO:0001673]; mitochondrion [GO:0005739]; nucleoplasm [GO:0005654]; nucleus [GO:0005634]; perichromatin fibrils [GO:0005726]
PFDN6	O15212	cytoplasm [GO:0005737]; prefoldin complex [GO:0016272]; protein folding chaperone complex [GO:0101031]; RPAP3/R2TP/prefoldin-like complex [GO:1990062]
CD3EAP	O15446	chromosome [GO:0005694]; cytosol [GO:0005829]; fibrillar center [GO:0001650]; mitochondrion [GO:0005739]; nucleolus [GO:0005730]; nucleoplasm [GO:0005654]; RNA polymerase I complex [GO:0005736]; RNA polymerase I transcription regulator complex [GO:0000120]
PHGDH	O43175	cytosol [GO:0005829]; extracellular exosome [GO:0070062]
PSMD3	O43242	cytosol [GO:0005829]; extracellular exosome [GO:0070062]; extracellular region [GO:0005576]; ficolin-1-rich granule lumen [GO:1904813]; membrane [GO:0016020]; nucleoplasm [GO:0005654]; nucleus [GO:0005634]; proteasome accessory complex [GO:0022624]; proteasome complex [GO:0000502]; proteasome regulatory particle, lid subcomplex [GO:0008541]; secretory granule lumen [GO:0034774]
SART1	O43290	Cajal body [GO:0015030]; catalytic step 2 spliceosome [GO:0071013]; cytoplasm [GO:0005737]; cytosol [GO:0005829]; Golgi apparatus [GO:0005794]; nuclear speck [GO:0016607]; nucleoplasm [GO:0005654]; nucleus [GO:0005634]; U2-type precatalytic spliceosome [GO:0071005]; U4/U6 x U5 tri-snRNP complex [GO:0046540]
MED7	O43513	core mediator complex [GO:0070847]; mediator complex [GO:0016592]; nuclear body [GO:0016604]; nucleoplasm [GO:0005654]; nucleus [GO:0005634]; transcription regulator complex [GO:0005667]; ubiquitin ligase complex [GO:0000151]
MYO1B	O43795	actin cytoskeleton [GO:0015629]; actin filament [GO:0005884]; apical part of cell [GO:0045177]; brush border [GO:0005903]; cell periphery [GO:0071944]; cytoplasm [GO:0005737]; early endosome [GO:0005769]; endosome membrane [GO:0010008]; extracellular exosome [GO:0070062]; filopodium [GO:0030175]; myosin complex [GO:0016459]; perinuclear region of cytoplasm [GO:0048471]; plasma membrane [GO:000588…
NME2P1	O60361	extracellular exosome [GO:0070062]; nucleus [GO:0005634]
PLIN3	O60664	cytoplasm [GO:0005737]; cytosol [GO:0005829]; endosome [GO:0005768]; endosome membrane [GO:0010008]; Golgi apparatus [GO:0005794]; lipid droplet [GO:0005811]; membrane [GO:0016020]; transport vesicle [GO:0030133]
DKC1	O60832	box H/ACA scaRNP complex [GO:0072589]; box H/ACA snoRNP complex [GO:0031429]; box H/ACA telomerase RNP complex [GO:0090661]; cytoplasm [GO:0005737]; fibrillar center [GO:0001650]; nucleolus [GO:0005730]; nucleoplasm [GO:0005654]; nucleus [GO:0005634]; telomerase holoenzyme complex [GO:0005697]
BRD4	O60885	chromosome [GO:0005694]; condensed nuclear chromosome [GO:0000794]; nucleoplasm [GO:0005654]; nucleus [GO:0005634]
NCOR1	O75376	chromatin [GO:0000785]; cytosol [GO:0005829]; histone deacetylase complex [GO:0000118]; membrane [GO:0016020]; mitotic spindle [GO:0072686]; nucleoplasm [GO:0005654]; nucleus [GO:0005634]; transcription repressor complex [GO:0017053]
SF3B1	O75533	B-WICH complex [GO:0110016]; catalytic step 2 spliceosome [GO:0071013]; nuclear speck [GO:0016607]; nucleolus [GO:0005730]; nucleoplasm [GO:0005654]; nucleus [GO:0005634]; spliceosomal complex [GO:0005681]; U11/U12 snRNP [GO:0034693]; U12-type spliceosomal complex [GO:0005689]; U2 snRNP [GO:0005686]; U2-type precatalytic spliceosome [GO:0071005]; U2-type prespliceosome [GO:0071004]; U2-type splic…
WDHD1	O75717	cytoplasm [GO:0005737]; nuclear replication fork [GO:0043596]; nucleoplasm [GO:0005654]
SRP72	O76094	cytosol [GO:0005829]; endoplasmic reticulum [GO:0005783]; signal recognition particle [GO:0048500]; signal recognition particle, endoplasmic reticulum targeting [GO:0005786]
NFAT5	O94916	chromatin [GO:0000785]; cytosol [GO:0005829]; nucleoplasm [GO:0005654]; nucleus [GO:0005634]; transcription regulator complex [GO:0005667]
LUC7L3	O95232	nuclear speck [GO:0016607]; nucleoplasm [GO:0005654]; nucleus [GO:0005634]; U1 snRNP [GO:0005685]; U2-type prespliceosome [GO:0071004]
VAPB	O95292	cytoplasm [GO:0005737]; endoplasmic reticulum [GO:0005783]; endoplasmic reticulum membrane [GO:0005789]; Golgi apparatus [GO:0005794]; plasma membrane [GO:0005886]
ZBTB7A	O95365	cytoplasm [GO:0005737]; DNA-dependent protein kinase complex [GO:0070418]; nucleus [GO:0005634]; site of double-strand break [GO:0035861]
AHSA1	O95433	cytosol [GO:0005829]; endoplasmic reticulum [GO:0005783]; extracellular exosome [GO:0070062]
WIZ	O95785	extracellular exosome [GO:0070062]; midbody [GO:0030496]; nucleoplasm [GO:0005654]; nucleus [GO:0005634]
BAG3	O95817	aggresome [GO:0016235]; cytoplasm [GO:0005737]; cytosol [GO:0005829]; membrane [GO:0016020]; neuron projection [GO:0043005]; nucleoplasm [GO:0005654]; nucleus [GO:0005634]; protein folding chaperone complex [GO:0101031]; stress fiber [GO:0001725]; Z disc [GO:0030018]
HPRT1	P00492	cytoplasm [GO:0005737]; cytosol [GO:0005829]; extracellular exosome [GO:0070062]
LMNA	P02545	cytosol [GO:0005829]; intermediate filament [GO:0005882]; lamin filament [GO:0005638]; nuclear envelope [GO:0005635]; nuclear lamina [GO:0005652]; nuclear matrix [GO:0016363]; nuclear membrane [GO:0031965]; nuclear speck [GO:0016607]; nucleoplasm [GO:0005654]; nucleus [GO:0005634]; perinuclear region of cytoplasm [GO:0048471]; site of double-strand break [GO:0035861]
ALDOA	P04075	actin cytoskeleton [GO:0015629]; cytosol [GO:0005829]; extracellular exosome [GO:0070062]; extracellular region [GO:0005576]; extracellular space [GO:0005615]; ficolin-1-rich granule lumen [GO:1904813]; I band [GO:0031674]; M band [GO:0031430]; membrane [GO:0016020]; nucleus [GO:0005634]; platelet alpha granule lumen [GO:0031093]; secretory granule lumen [GO:0034774]; sperm head [GO:0061827]; ter…
ANXA1	P04083	adherens junction [GO:0005912]; apical plasma membrane [GO:0016324]; basolateral plasma membrane [GO:0016323]; cell surface [GO:0009986]; collagen-containing extracellular matrix [GO:0062023]; cornified envelope [GO:0001533]; cytoplasm [GO:0005737]; cytosol [GO:0005829]; early endosome membrane [GO:0031901]; endosome [GO:0005768]; extracellular exosome [GO:0070062]; extracellular region [GO:00055…
NR3C1	P04150	chromatin [GO:0000785]; cytoplasm [GO:0005737]; cytosol [GO:0005829]; membrane [GO:0016020]; microtubule organizing center [GO:0005815]; mitochondrial matrix [GO:0005759]; nuclear speck [GO:0016607]; nucleoplasm [GO:0005654]; nucleus [GO:0005634]; protein-containing complex [GO:0032991]; spindle [GO:0005819]; synapse [GO:0045202]
RPLP0	P05388	cytoplasm [GO:0005737]; cytoplasmic ribonucleoprotein granule [GO:0036464]; cytosol [GO:0005829]; cytosolic large ribosomal subunit [GO:0022625]; cytosolic ribosome [GO:0022626]; endoplasmic reticulum [GO:0005783]; extracellular exosome [GO:0070062]; focal adhesion [GO:0005925]; membrane [GO:0016020]; nucleus [GO:0005634]; postsynapse [GO:0098794]; postsynaptic density [GO:0014069]; ribonucleopro…
ITGB1	P05556	cell surface [GO:0009986]; cerebellar climbing fiber to Purkinje cell synapse [GO:0150053]; cleavage furrow [GO:0032154]; cytoplasm [GO:0005737]; dendritic spine [GO:0043197]; endosome membrane [GO:0010008]; external side of plasma membrane [GO:0009897]; extracellular exosome [GO:0070062]; filopodium [GO:0030175]; focal adhesion [GO:0005925]; glial cell projection [GO:0097386]; integrin alpha1-be…
KRT18	P05783	adherens junction [GO:0005912]; cell periphery [GO:0071944]; centriolar satellite [GO:0034451]; cytoplasm [GO:0005737]; cytosol [GO:0005829]; extracellular exosome [GO:0070062]; intermediate filament [GO:0005882]; keratin filament [GO:0045095]; microtubule organizing center [GO:0005815]; nuclear matrix [GO:0016363]; nucleolus [GO:0005730]; perinuclear region of cytoplasm [GO:0048471]
KRT8	P05787	apicolateral plasma membrane [GO:0016327]; cell-cell junction [GO:0005911]; costamere [GO:0043034]; cytoplasm [GO:0005737]; cytosol [GO:0005829]; dystrophin-associated glycoprotein complex [GO:0016010]; extracellular exosome [GO:0070062]; intermediate filament [GO:0005882]; intermediate filament cytoskeleton [GO:0045111]; keratin filament [GO:0045095]; nuclear matrix [GO:0016363]; nucleoplasm [GO…
NPM1	P06748	centrosome [GO:0005813]; cytoplasm [GO:0005737]; cytosol [GO:0005829]; focal adhesion [GO:0005925]; granular component [GO:0001652]; membrane [GO:0016020]; nucleolus [GO:0005730]; nucleoplasm [GO:0005654]; nucleus [GO:0005634]; protein-containing complex [GO:0032991]; protein-DNA complex [GO:0032993]; ribonucleoprotein complex [GO:1990904]; spindle pole centrosome [GO:0031616]
ANXA2	P07355	adherens junction [GO:0005912]; AnxA2-p11 complex [GO:1990665]; azurophil granule lumen [GO:0035578]; basement membrane [GO:0005604]; basolateral plasma membrane [GO:0016323]; cell surface [GO:0009986]; collagen-containing extracellular matrix [GO:0062023]; cornified envelope [GO:0001533]; cytoplasm [GO:0005737]; cytosol [GO:0005829]; early endosome [GO:0005769]; endosome [GO:0005768]; extracellu…
HSP90AA1	P07900	apical plasma membrane [GO:0016324]; axonal growth cone [GO:0044295]; basolateral plasma membrane [GO:0016323]; brush border membrane [GO:0031526]; cell surface [GO:0009986]; collagen-containing extracellular matrix [GO:0062023]; cytoplasm [GO:0005737]; cytosol [GO:0005829]; dendritic growth cone [GO:0044294]; endocytic vesicle lumen [GO:0071682]; extracellular exosome [GO:0070062]; extracellular…
HNRNPC	P07910	actin cytoskeleton [GO:0015629]; catalytic step 2 spliceosome [GO:0071013]; chromatin [GO:0000785]; cytosol [GO:0005829]; extracellular exosome [GO:0070062]; extracellular region [GO:0005576]; membrane [GO:0016020]; nucleoplasm [GO:0005654]; nucleus [GO:0005634]; protein-containing complex [GO:0032991]; spliceosomal complex [GO:0005681]; telomerase holoenzyme complex [GO:0005697]
VIM	P08670	axon [GO:0030424]; cell leading edge [GO:0031252]; cytoplasm [GO:0005737]; cytoskeleton [GO:0005856]; cytosol [GO:0005829]; extracellular exosome [GO:0070062]; focal adhesion [GO:0005925]; intermediate filament [GO:0005882]; intermediate filament cytoskeleton [GO:0045111]; microtubule organizing center [GO:0005815]; nuclear matrix [GO:0016363]; peroxisome [GO:0005777]; phagocytic vesicle [GO:0045…
RPS17	P08708	cytoplasm [GO:0005737]; cytosol [GO:0005829]; cytosolic ribosome [GO:0022626]; cytosolic small ribosomal subunit [GO:0022627]; focal adhesion [GO:0005925]; membrane [GO:0016020]; nucleolus [GO:0005730]; nucleoplasm [GO:0005654]; ribosome [GO:0005840]; small-subunit processome [GO:0032040]; synapse [GO:0045202]
ANXA5	P08758	collagen-containing extracellular matrix [GO:0062023]; cytoplasm [GO:0005737]; cytosol [GO:0005829]; endothelial microparticle [GO:0072563]; external side of plasma membrane [GO:0009897]; extracellular exosome [GO:0070062]; extracellular region [GO:0005576]; focal adhesion [GO:0005925]; membrane [GO:0016020]
FGF2	P09038	cytoplasm [GO:0005737]; extracellular region [GO:0005576]; extracellular space [GO:0005615]; nucleus [GO:0005634]
PARP1	P09874	chromatin [GO:0000785]; chromosome, telomeric region [GO:0000781]; cytosol [GO:0005829]; membrane [GO:0016020]; mitochondrion [GO:0005739]; nuclear body [GO:0016604]; nuclear envelope [GO:0005635]; nuclear replication fork [GO:0043596]; nucleolus [GO:0005730]; nucleoplasm [GO:0005654]; nucleus [GO:0005634]; protein-containing complex [GO:0032991]; protein-DNA complex [GO:0032993]; site of DNA dam…
HSPA5	P11021	cell surface [GO:0009986]; cytoplasm [GO:0005737]; cytosol [GO:0005829]; endoplasmic reticulum [GO:0005783]; endoplasmic reticulum chaperone complex [GO:0034663]; endoplasmic reticulum lumen [GO:0005788]; endoplasmic reticulum membrane [GO:0005789]; endoplasmic reticulum-Golgi intermediate compartment [GO:0005793]; extracellular exosome [GO:0070062]; focal adhesion [GO:0005925]; intracellular mem…
HSPA8	P11142	autophagosome [GO:0005776]; blood microparticle [GO:0072562]; clathrin-sculpted gamma-aminobutyric acid transport vesicle membrane [GO:0061202]; cytoplasm [GO:0005737]; cytosol [GO:0005829]; dendrite [GO:0030425]; extracellular exosome [GO:0070062]; extracellular region [GO:0005576]; extracellular space [GO:0005615]; ficolin-1-rich granule lumen [GO:1904813]; focal adhesion [GO:0005925]; glutamat…
TOP1	P11387	chromosome [GO:0005694]; fibrillar center [GO:0001650]; male germ cell nucleus [GO:0001673]; nucleolus [GO:0005730]; nucleoplasm [GO:0005654]; nucleus [GO:0005634]; P-body [GO:0000932]; perikaryon [GO:0043204]; protein-DNA complex [GO:0032993]
TOP2A	P11388	chromosome, centromeric region [GO:0000775]; condensed chromosome [GO:0000793]; cytoplasm [GO:0005737]; DNA topoisomerase type II (double strand cut, ATP-hydrolyzing) complex [GO:0009330]; male germ cell nucleus [GO:0001673]; nucleolus [GO:0005730]; nucleoplasm [GO:0005654]; nucleus [GO:0005634]; protein-containing complex [GO:0032991]; ribonucleoprotein complex [GO:1990904]
EEF2	P13639	aggresome [GO:0016235]; cytoplasm [GO:0005737]; cytosol [GO:0005829]; extracellular exosome [GO:0070062]; extracellular region [GO:0005576]; ficolin-1-rich granule lumen [GO:1904813]; membrane [GO:0016020]; nucleus [GO:0005634]; plasma membrane [GO:0005886]; polysome [GO:0005844]; ribonucleoprotein complex [GO:1990904]; secretory granule lumen [GO:0034774]; synapse [GO:0045202]
PKM	P14618	cilium [GO:0005929]; collagen-containing extracellular matrix [GO:0062023]; cytoplasm [GO:0005737]; cytosol [GO:0005829]; extracellular exosome [GO:0070062]; extracellular region [GO:0005576]; extracellular vesicle [GO:1903561]; ficolin-1-rich granule lumen [GO:1904813]; mitochondrion [GO:0005739]; nucleus [GO:0005634]; rough endoplasmic reticulum [GO:0005791]; secretory granule lumen [GO:0034774…
PGAM2	P15259	cytosol [GO:0005829]; extracellular exosome [GO:0070062]; nucleus [GO:0005634]
FOSL2	P15408	chromatin [GO:0000785]; nucleoplasm [GO:0005654]; nucleus [GO:0005634]; RNA polymerase II transcription regulator complex [GO:0090575]
RPS2	P15880	cytoplasm [GO:0005737]; cytosol [GO:0005829]; cytosolic ribosome [GO:0022626]; cytosolic small ribosomal subunit [GO:0022627]; extracellular exosome [GO:0070062]; focal adhesion [GO:0005925]; membrane [GO:0016020]; nucleoplasm [GO:0005654]; nucleus [GO:0005634]
ZNF24	P17028	nucleoplasm [GO:0005654]; nucleus [GO:0005634]
JUNB	P17275	chromatin [GO:0000785]; nucleoplasm [GO:0005654]; nucleus [GO:0005634]; RNA polymerase II transcription regulator complex [GO:0090575]; transcription factor AP-1 complex [GO:0035976]; transcription regulator complex [GO:0005667]
DDX5	P17844	catalytic step 2 spliceosome [GO:0071013]; cytoplasm [GO:0005737]; cytosol [GO:0005829]; extracellular exosome [GO:0070062]; membrane [GO:0016020]; nuclear speck [GO:0016607]; nucleolus [GO:0005730]; nucleoplasm [GO:0005654]; nucleus [GO:0005634]; ribonucleoprotein complex [GO:1990904]
NELFE	P18615	chromatin [GO:0000785]; NELF complex [GO:0032021]; nuclear body [GO:0016604]; nucleoplasm [GO:0005654]; nucleus [GO:0005634]; plasma membrane [GO:0005886]
XRCC1	P18887	chromatin [GO:0000785]; chromosome, telomeric region [GO:0000781]; ERCC4-ERCC1 complex [GO:0070522]; nucleolus [GO:0005730]; nucleoplasm [GO:0005654]; nucleus [GO:0005634]; site of DNA damage [GO:0090734]
NCL	P19338	cell cortex [GO:0005938]; chromosome [GO:0005694]; cornified envelope [GO:0001533]; cytoplasmic ribonucleoprotein granule [GO:0036464]; extracellular exosome [GO:0070062]; membrane [GO:0016020]; nucleolus [GO:0005730]; nucleoplasm [GO:0005654]; nucleus [GO:0005634]; ribonucleoprotein complex [GO:1990904]; spliceosomal complex [GO:0005681]
FLNA	P21333	actin cytoskeleton [GO:0015629]; actin filament bundle [GO:0032432]; axonal growth cone [GO:0044295]; brush border [GO:0005903]; cell cortex [GO:0005938]; cell-cell junction [GO:0005911]; cytoplasm [GO:0005737]; cytosol [GO:0005829]; extracellular exosome [GO:0070062]; extracellular region [GO:0005576]; focal adhesion [GO:0005925]; glycoprotein Ib-IX-V complex [GO:1990779]; membrane [GO:0016020];…
RPS3	P23396	cytoplasm [GO:0005737]; cytosol [GO:0005829]; cytosolic ribosome [GO:0022626]; cytosolic small ribosomal subunit [GO:0022627]; endoplasmic reticulum [GO:0005783]; extracellular exosome [GO:0070062]; focal adhesion [GO:0005925]; membrane [GO:0016020]; mitochondrial inner membrane [GO:0005743]; mitochondrial matrix [GO:0005759]; mitotic spindle [GO:0072686]; NF-kappaB complex [GO:0071159]; nucleolu…
RPL13	P26373	cytoplasm [GO:0005737]; cytosol [GO:0005829]; cytosolic large ribosomal subunit [GO:0022625]; cytosolic ribosome [GO:0022626]; endoplasmic reticulum [GO:0005783]; membrane [GO:0016020]; nucleolus [GO:0005730]; nucleus [GO:0005634]; synapse [GO:0045202]
EEF1G	P26641	cytoplasm [GO:0005737]; cytosol [GO:0005829]; extracellular exosome [GO:0070062]; membrane [GO:0016020]; nucleus [GO:0005634]
MAP4	P27816	axon [GO:0030424]; axoneme [GO:0005930]; microtubule [GO:0005874]; microtubule associated complex [GO:0005875]; microtubule organizing center [GO:0005815]; mitotic spindle [GO:0072686]; neuron projection [GO:0043005]
NKTR	P30414	cytoplasm [GO:0005737]; nucleus [GO:0005634]; plasma membrane [GO:0005886]
ADSL	P30566	cytosol [GO:0005829]; protein-containing complex [GO:0032991]
STIP1	P31948	cytosol [GO:0005829]; dynein axonemal particle [GO:0120293]; Golgi apparatus [GO:0005794]; nucleus [GO:0005634]; protein folding chaperone complex [GO:0101031]; protein-containing complex [GO:0032991]
RPL4	P36578	cytoplasm [GO:0005737]; cytosol [GO:0005829]; cytosolic large ribosomal subunit [GO:0022625]; cytosolic ribosome [GO:0022626]; extracellular exosome [GO:0070062]; focal adhesion [GO:0005925]; membrane [GO:0016020]; nucleolus [GO:0005730]; nucleus [GO:0005634]; ribonucleoprotein complex [GO:1990904]; rough endoplasmic reticulum [GO:0005791]
RBMX	P38159	catalytic step 2 spliceosome [GO:0071013]; euchromatin [GO:0000791]; extracellular exosome [GO:0070062]; extracellular space [GO:0005615]; membrane [GO:0016020]; nucleoplasm [GO:0005654]; nucleus [GO:0005634]; protein-containing complex [GO:0032991]; ribonucleoprotein complex [GO:1990904]; spliceosomal complex [GO:0005681]; supraspliceosomal complex [GO:0044530]
RPL3	P39023	cytoplasm [GO:0005737]; cytosol [GO:0005829]; cytosolic large ribosomal subunit [GO:0022625]; cytosolic ribosome [GO:0022626]; extracellular exosome [GO:0070062]; focal adhesion [GO:0005925]; nucleolus [GO:0005730]; nucleus [GO:0005634]; protein-containing complex [GO:0032991]; synapse [GO:0045202]
STAT1	P42224	axon [GO:0030424]; chromatin [GO:0000785]; cytoplasm [GO:0005737]; cytosol [GO:0005829]; dendrite [GO:0030425]; ISGF3 complex [GO:0070721]; nucleolus [GO:0005730]; nucleoplasm [GO:0005654]; nucleus [GO:0005634]; perinuclear region of cytoplasm [GO:0048471]; protein-containing complex [GO:0032991]; RNA polymerase II transcription regulator complex [GO:0090575]
RANBP1	P43487	centrosome [GO:0005813]; cytoplasm [GO:0005737]; cytosol [GO:0005829]; nuclear envelope [GO:0005635]; nuclear pore [GO:0005643]; nucleus [GO:0005634]
MKI67	P46013	chromosome [GO:0005694]; membrane [GO:0016020]; nuclear body [GO:0016604]; nucleolus [GO:0005730]; nucleoplasm [GO:0005654]; nucleus [GO:0005634]
RANGAP1	P46060	aggresome [GO:0016235]; axon cytoplasm [GO:1904115]; cytoplasm [GO:0005737]; cytoplasmic periphery of the nuclear pore complex [GO:1990723]; cytosol [GO:0005829]; dendrite [GO:0030425]; intracellular membrane-bounded organelle [GO:0043231]; kinetochore [GO:0000776]; mitotic spindle [GO:0072686]; nuclear envelope [GO:0005635]; nuclear membrane [GO:0031965]; nuclear pore [GO:0005643]; nuclear pore …
NOP2	P46087	nucleolus [GO:0005730]; nucleoplasm [GO:0005654]
ATRX	P46100	chromosome, subtelomeric region [GO:0099115]; chromosome, telomeric region [GO:0000781]; condensed chromosome, centromeric region [GO:0000779]; heterochromatin [GO:0000792]; nuclear body [GO:0016604]; nuclear chromosome [GO:0000228]; nucleoplasm [GO:0005654]; nucleus [GO:0005634]; pericentric heterochromatin [GO:0005721]; PML body [GO:0016605]
RPL5	P46777	cytoplasm [GO:0005737]; cytosol [GO:0005829]; cytosolic large ribosomal subunit [GO:0022625]; cytosolic ribosome [GO:0022626]; endoplasmic reticulum [GO:0005783]; extracellular exosome [GO:0070062]; focal adhesion [GO:0005925]; membrane [GO:0016020]; nucleolus [GO:0005730]; nucleoplasm [GO:0005654]; nucleus [GO:0005634]; protein-containing complex [GO:0032991]; ribonucleoprotein complex [GO:19909…
NES	P48681	cytoplasm [GO:0005737]; intermediate filament [GO:0005882]; intermediate filament cytoskeleton [GO:0045111]
NASP	P49321	chromatin [GO:0000785]; cytoplasm [GO:0005737]; nucleoplasm [GO:0005654]; nucleus [GO:0005634]; protein-containing complex [GO:0032991]
YLPM1	P49750	cytosol [GO:0005829]; nuclear speck [GO:0016607]; nucleoplasm [GO:0005654]; nucleus [GO:0005634]
RANBP2	P49792	annulate lamellae [GO:0005642]; cytoplasm [GO:0005737]; cytosol [GO:0005829]; intracellular membrane-bounded organelle [GO:0043231]; membrane [GO:0016020]; nuclear envelope [GO:0005635]; nuclear inclusion body [GO:0042405]; nuclear membrane [GO:0031965]; nuclear pore [GO:0005643]; nuclear pore cytoplasmic filaments [GO:0044614]; nuclear pore nuclear basket [GO:0044615]; nucleoplasm [GO:0005654]; …
CCT8	P50990	azurophil granule lumen [GO:0035578]; cell body [GO:0044297]; centrosome [GO:0005813]; chaperonin-containing T-complex [GO:0005832]; cilium [GO:0005929]; cytoplasm [GO:0005737]; cytosol [GO:0005829]; extracellular exosome [GO:0070062]; extracellular region [GO:0005576]; ficolin-1-rich granule lumen [GO:1904813]; intermediate filament cytoskeleton [GO:0045111]; microtubule [GO:0005874]; nucleoplas…
HDGF	P51858	collagen-containing extracellular matrix [GO:0062023]; cytoplasm [GO:0005737]; extracellular region [GO:0005576]; extracellular space [GO:0005615]; nucleoplasm [GO:0005654]; nucleus [GO:0005634]; transcription repressor complex [GO:0017053]
HNRNPM	P52272	catalytic step 2 spliceosome [GO:0071013]; collagen-containing extracellular matrix [GO:0062023]; extracellular exosome [GO:0070062]; membrane [GO:0016020]; nuclear matrix [GO:0016363]; nucleolus [GO:0005730]; nucleoplasm [GO:0005654]; nucleus [GO:0005634]; paraspeckles [GO:0042382]; spliceosomal complex [GO:0005681]; synapse [GO:0045202]
ARHGDIA	P52565	cytoskeleton [GO:0005856]; cytosol [GO:0005829]; extracellular exosome [GO:0070062]; immunological synapse [GO:0001772]; membrane [GO:0016020]; nucleus [GO:0005634]; Schaffer collateral - CA1 synapse [GO:0098685]
SUB1	P53999	extracellular exosome [GO:0070062]; nucleolus [GO:0005730]; nucleoplasm [GO:0005654]; nucleus [GO:0005634]; transcription regulator complex [GO:0005667]
ADAR	P55265	cytoplasm [GO:0005737]; membrane [GO:0016020]; nucleolus [GO:0005730]; nucleoplasm [GO:0005654]; nucleus [GO:0005634]; supraspliceosomal complex [GO:0044530]
ZNF445	P59923	nucleus [GO:0005634]
TPI1	P60174	cytosol [GO:0005829]; extracellular exosome [GO:0070062]; extracellular space [GO:0005615]; nucleus [GO:0005634]
ACTB	P60709	actin cytoskeleton [GO:0015629]; adherens junction [GO:0005912]; apical junction complex [GO:0043296]; bBAF complex [GO:0140092]; blood microparticle [GO:0072562]; brahma complex [GO:0035060]; brush border [GO:0005903]; calyx of Held [GO:0044305]; cell-cell junction [GO:0005911]; chromatin [GO:0000785]; cortical cytoskeleton [GO:0030863]; cytoplasm [GO:0005737]; cytoplasmic ribonucleoprotein gran…
UBE2K	P61086	cytoplasm [GO:0005737]; cytosol [GO:0005829]; filopodium tip [GO:0032433]; nucleus [GO:0005634]
SUMO2	P61956	nucleoplasm [GO:0005654]; nucleus [GO:0005634]; PML body [GO:0016605]
HNRNPK	P61978	catalytic step 2 spliceosome [GO:0071013]; cell projection [GO:0042995]; chromatin [GO:0000785]; cytoplasm [GO:0005737]; cytoplasmic stress granule [GO:0010494]; extracellular exosome [GO:0070062]; focal adhesion [GO:0005925]; membrane [GO:0016020]; nucleoplasm [GO:0005654]; nucleus [GO:0005634]; podosome [GO:0002102]; ribonucleoprotein complex [GO:1990904]
RPL10A	P62906	cytoplasm [GO:0005737]; cytosol [GO:0005829]; cytosolic large ribosomal subunit [GO:0022625]; cytosolic ribosome [GO:0022626]; extracellular exosome [GO:0070062]; focal adhesion [GO:0005925]; membrane [GO:0016020]; nucleus [GO:0005634]; polysomal ribosome [GO:0042788]
SKP1	P63208	centrosome [GO:0005813]; Cul7-RING ubiquitin ligase complex [GO:0031467]; cytoplasm [GO:0005737]; cytosol [GO:0005829]; nucleoplasm [GO:0005654]; nucleus [GO:0005634]; PcG protein complex [GO:0031519]; SCF ubiquitin ligase complex [GO:0019005]
UBE2I	P63279	cytoplasm [GO:0005737]; cytosol [GO:0005829]; nuclear envelope [GO:0005635]; nuclear pore [GO:0005643]; nucleoplasm [GO:0005654]; nucleus [GO:0005634]; perinuclear region of cytoplasm [GO:0048471]; PML body [GO:0016605]; SUMO ligase complex [GO:0106068]; synaptonemal complex [GO:0000795]; transferase complex [GO:1990234]
EEF1A1	P68104	cortical actin cytoskeleton [GO:0030864]; cytoplasm [GO:0005737]; cytoplasmic side of lysosomal membrane [GO:0098574]; cytosol [GO:0005829]; cytosolic ribosome [GO:0022626]; eukaryotic translation elongation factor 1 complex [GO:0005853]; extracellular exosome [GO:0070062]; extracellular region [GO:0005576]; extracellular space [GO:0005615]; ficolin-1-rich granule lumen [GO:1904813]; membrane [GO…
TUBA1B	P68363	cytoplasm [GO:0005737]; cytoplasmic microtubule [GO:0005881]; microtubule [GO:0005874]; microtubule cytoskeleton [GO:0015630]
GTF2I	P78347	cytoplasm [GO:0005737]; membrane [GO:0016020]; nucleoplasm [GO:0005654]; nucleus [GO:0005634]
KRT85	P78386	cytosol [GO:0005829]; extracellular space [GO:0005615]; keratin filament [GO:0045095]
BASP1	P80723	cell junction [GO:0030054]; chromatin [GO:0000785]; cytoplasm [GO:0005737]; cytoskeleton [GO:0005856]; extracellular exosome [GO:0070062]; growth cone [GO:0030426]; nuclear matrix [GO:0016363]; nuclear speck [GO:0016607]; nucleus [GO:0005634]; plasma membrane [GO:0005886]; PML body [GO:0016605]; vesicle [GO:0031982]
HMGN5	P82970	chromatin [GO:0000785]; mitochondrion [GO:0005739]; nucleoplasm [GO:0005654]; nucleus [GO:0005634]
RPL19	P84098	cytoplasm [GO:0005737]; cytosol [GO:0005829]; cytosolic large ribosomal subunit [GO:0022625]; cytosolic ribosome [GO:0022626]; focal adhesion [GO:0005925]; membrane [GO:0016020]; nucleolus [GO:0005730]; polysomal ribosome [GO:0042788]; synapse [GO:0045202]
HNRNPU	Q00839	catalytic step 2 spliceosome [GO:0071013]; cell surface [GO:0009986]; centrosome [GO:0005813]; CRD-mediated mRNA stability complex [GO:0070937]; cytoplasmic ribonucleoprotein granule [GO:0036464]; cytosol [GO:0005829]; dendrite cytoplasm [GO:0032839]; inactive sex chromosome [GO:0098577]; kinetochore [GO:0000776]; membrane [GO:0016020]; midbody [GO:0030496]; mitotic spindle [GO:0072686]; mitotic …
CAP1	Q01518	azurophil granule lumen [GO:0035578]; cortical actin cytoskeleton [GO:0030864]; cytoplasm [GO:0005737]; extracellular exosome [GO:0070062]; extracellular region [GO:0005576]; focal adhesion [GO:0005925]; plasma membrane [GO:0005886]
EXOSC10	Q01780	cytoplasm [GO:0005737]; cytoplasmic exosome (RNase complex) [GO:0000177]; cytosol [GO:0005829]; euchromatin [GO:0000791]; exosome (RNase complex) [GO:0000178]; membrane [GO:0016020]; nuclear exosome (RNase complex) [GO:0000176]; nucleolar exosome (RNase complex) [GO:0101019]; nucleolus [GO:0005730]; nucleoplasm [GO:0005654]; nucleus [GO:0005634]; small-subunit processome [GO:0032040]
AKAP17A	Q02040	cytosol [GO:0005829]; nuclear speck [GO:0016607]; nucleus [GO:0005634]; spliceosomal complex [GO:0005681]
SP3	Q02447	chromatin [GO:0000785]; cytosol [GO:0005829]; nucleoplasm [GO:0005654]; nucleus [GO:0005634]; PML body [GO:0016605]; protein-DNA complex [GO:0032993]; transcription repressor complex [GO:0017053]
FKBP4	Q02790	axonal growth cone [GO:0044295]; cytoplasm [GO:0005737]; cytosol [GO:0005829]; extracellular exosome [GO:0070062]; microtubule [GO:0005874]; mitochondrion [GO:0005739]; neuronal cell body [GO:0043025]; nucleoplasm [GO:0005654]; perinuclear region of cytoplasm [GO:0048471]; protein-containing complex [GO:0032991]
AKAP12	Q02952	cell cortex [GO:0005938]; cytoplasm [GO:0005737]; cytoskeleton [GO:0005856]; cytosol [GO:0005829]; focal adhesion [GO:0005925]; neuronal cell body [GO:0043025]; plasma membrane [GO:0005886]; Schaffer collateral - CA1 synapse [GO:0098685]
KRT17	Q04695	cornified envelope [GO:0001533]; cytosol [GO:0005829]; intermediate filament cytoskeleton [GO:0045111]; keratin filament [GO:0045095]
EXOSC9	Q06265	cytoplasm [GO:0005737]; cytoplasmic exosome (RNase complex) [GO:0000177]; cytosol [GO:0005829]; exosome (RNase complex) [GO:0000178]; extracellular exosome [GO:0070062]; nuclear chromosome [GO:0000228]; nuclear exosome (RNase complex) [GO:0000176]; nucleolar exosome (RNase complex) [GO:0101019]; nucleolus [GO:0005730]; nucleoplasm [GO:0005654]; nucleus [GO:0005634]
PRDX1	Q06830	cytoplasm [GO:0005737]; cytosol [GO:0005829]; extracellular exosome [GO:0070062]; extracellular space [GO:0005615]; melanosome [GO:0042470]; nucleus [GO:0005634]
KHDRBS1	Q07666	cytoplasm [GO:0005737]; cytosol [GO:0005829]; Grb2-Sos complex [GO:0070618]; membrane [GO:0016020]; nucleoplasm [GO:0005654]; nucleus [GO:0005634]; protein-containing complex [GO:0032991]
AHNAK	Q09666	actin cytoskeleton [GO:0015629]; cell-cell contact zone [GO:0044291]; costamere [GO:0043034]; cytoplasm [GO:0005737]; cytosol [GO:0005829]; extracellular exosome [GO:0070062]; focal adhesion [GO:0005925]; lysosomal membrane [GO:0005765]; membrane [GO:0016020]; nucleus [GO:0005634]; plasma membrane [GO:0005886]; plasma membrane protein complex [GO:0098797]; sarcolemma [GO:0042383]; T-tubule [GO:00…
CHD3	Q12873	centriolar satellite [GO:0034451]; centrosome [GO:0005813]; chromatin [GO:0000785]; cytoplasm [GO:0005737]; nucleolus [GO:0005730]; nucleoplasm [GO:0005654]; nucleus [GO:0005634]; NuRD complex [GO:0016581]; PML body [GO:0016605]
TP53BP1	Q12888	chromosome, telomeric region [GO:0000781]; cytoplasm [GO:0005737]; DNA repair complex [GO:1990391]; kinetochore [GO:0000776]; nuclear body [GO:0016604]; nucleoplasm [GO:0005654]; nucleus [GO:0005634]; replication fork [GO:0005657]; site of double-strand break [GO:0035861]
AIMP1	Q12904	aminoacyl-tRNA synthetase multienzyme complex [GO:0017101]; cell surface [GO:0009986]; cytosol [GO:0005829]; endoplasmic reticulum [GO:0005783]; extracellular space [GO:0005615]; Golgi apparatus [GO:0005794]; membrane [GO:0016020]; nucleus [GO:0005634]
ILF3	Q12906	cytoplasm [GO:0005737]; extracellular region [GO:0005576]; membrane [GO:0016020]; mitochondrion [GO:0005739]; nucleolus [GO:0005730]; nucleoplasm [GO:0005654]; nucleus [GO:0005634]; ribonucleoprotein complex [GO:1990904]
CHAF1A	Q13111	CAF-1 complex [GO:0033186]; chromatin [GO:0000785]; nucleus [GO:0005634]; protein-containing complex [GO:0032991]
TRIM28	Q13263	euchromatin [GO:0000791]; heterochromatin [GO:0000792]; nucleoplasm [GO:0005654]; nucleus [GO:0005634]; protein-containing complex [GO:0032991]; RNA polymerase II transcription regulator complex [GO:0090575]
TCOF1	Q13428	cytosol [GO:0005829]; fibrillar center [GO:0001650]; nucleolus [GO:0005730]; nucleoplasm [GO:0005654]
SF3B2	Q13435	catalytic step 2 spliceosome [GO:0071013]; nuclear speck [GO:0016607]; nucleoplasm [GO:0005654]; nucleus [GO:0005634]; precatalytic spliceosome [GO:0071011]; spliceosomal complex [GO:0005681]; U12-type spliceosomal complex [GO:0005689]; U2 snRNP [GO:0005686]; U2-type precatalytic spliceosome [GO:0071005]; U2-type spliceosomal complex [GO:0005684]
PRPF4B	Q13523	catalytic step 2 spliceosome [GO:0071013]; chromosome [GO:0005694]; nuclear speck [GO:0016607]; nucleoplasm [GO:0005654]; nucleus [GO:0005634]
NACA	Q13765	cytoplasm [GO:0005737]; extracellular exosome [GO:0070062]; nascent polypeptide-associated complex [GO:0005854]; nucleus [GO:0005634]
SAFB2	Q14151	cytoplasm [GO:0005737]; extracellular exosome [GO:0070062]; intracellular membrane-bounded organelle [GO:0043231]; nuclear body [GO:0016604]; nucleoplasm [GO:0005654]; nucleus [GO:0005634]
MAP7	Q14244	axon [GO:0030424]; basolateral plasma membrane [GO:0016323]; cytosol [GO:0005829]; microtubule [GO:0005874]; microtubule associated complex [GO:0005875]; microtubule cytoskeleton [GO:0015630]; perinuclear region of cytoplasm [GO:0048471]
CTTN	Q14247	cell cortex [GO:0005938]; clathrin-coated pit [GO:0005905]; cortical cytoskeleton [GO:0030863]; cytoplasm [GO:0005737]; cytoskeleton [GO:0005856]; cytosol [GO:0005829]; dendritic spine [GO:0043197]; endocytic vesicle [GO:0030139]; endoplasmic reticulum [GO:0005783]; focal adhesion [GO:0005925]; Golgi apparatus [GO:0005794]; intracellular membrane-bounded organelle [GO:0043231]; lamellipodium [GO:…
MDC1	Q14676	chromosome [GO:0005694]; focal adhesion [GO:0005925]; nuclear body [GO:0016604]; nucleoplasm [GO:0005654]; nucleus [GO:0005634]
PDCD11	Q14690	cytosol [GO:0005829]; nucleolus [GO:0005730]; nucleoplasm [GO:0005654]; nucleus [GO:0005634]; small-subunit processome [GO:0032040]
BMS1	Q14692	90S preribosome [GO:0030686]; chromosome [GO:0005694]; nucleolus [GO:0005730]; nucleoplasm [GO:0005654]; small-subunit processome [GO:0032040]
NOLC1	Q14978	box C/D RNP complex [GO:0031428]; box H/ACA snoRNP complex [GO:0031429]; Cajal body [GO:0015030]; cytoplasm [GO:0005737]; fibrillar center [GO:0001650]; nucleolus [GO:0005730]; nucleoplasm [GO:0005654]
NUMA1	Q14980	cell cortex [GO:0005938]; cell cortex region [GO:0099738]; centrosome [GO:0005813]; chromosome [GO:0005694]; cortical microtubule [GO:0055028]; cytoplasmic microtubule bundle [GO:1905720]; cytosol [GO:0005829]; dendrite [GO:0030425]; extracellular exosome [GO:0070062]; extrinsic component of plasma membrane [GO:0019897]; lateral cell cortex [GO:0097575]; lateral plasma membrane [GO:0016328]; micr…
EFTUD2	Q15029	Cajal body [GO:0015030]; catalytic step 2 spliceosome [GO:0071013]; cytosol [GO:0005829]; intracellular membrane-bounded organelle [GO:0043231]; membrane [GO:0016020]; nuclear speck [GO:0016607]; nucleoplasm [GO:0005654]; nucleus [GO:0005634]; U2-type catalytic step 2 spliceosome [GO:0071007]; U2-type precatalytic spliceosome [GO:0071005]; U4/U6 x U5 tri-snRNP complex [GO:0046540]
SETDB1	Q15047	chromosome [GO:0005694]; cytoplasm [GO:0005737]; intracellular membrane-bounded organelle [GO:0043231]; nucleoplasm [GO:0005654]; nucleus [GO:0005634]
WDR43	Q15061	chromatin [GO:0000785]; fibrillar center [GO:0001650]; nucleolus [GO:0005730]; nucleoplasm [GO:0005654]; small-subunit processome [GO:0032040]
SAFB	Q15424	midbody [GO:0030496]; nucleoplasm [GO:0005654]; nucleus [GO:0005634]
CDC37	Q16543	cytoplasm [GO:0005737]; cytosol [GO:0005829]; extracellular exosome [GO:0070062]; HSP90-CDC37 chaperone complex [GO:1990565]; protein folding chaperone complex [GO:0101031]
NFIL3	Q16649	chromatin [GO:0000785]; nucleus [GO:0005634]; RNA polymerase II transcription regulator complex [GO:0090575]
IFI16	Q16666	cytoplasm [GO:0005737]; cytosol [GO:0005829]; membrane [GO:0016020]; nuclear speck [GO:0016607]; nucleolus [GO:0005730]; nucleoplasm [GO:0005654]; nucleus [GO:0005634]
ZNF827	Q17R98	chromatin [GO:0000785]; chromosome, telomeric region [GO:0000781]; nucleus [GO:0005634]; ribonucleoprotein complex [GO:1990904]
KNOP1	Q1ED39	nucleolus [GO:0005730]
ZNF800	Q2TB10	nucleus [GO:0005634]
LRRFIP1	Q32MZ4	cytoplasm [GO:0005737]; cytoskeleton [GO:0005856]; cytosol [GO:0005829]; nucleus [GO:0005634]; plasma membrane [GO:0005886]
RRP12	Q5JTH9	cytosol [GO:0005829]; intracellular membrane-bounded organelle [GO:0043231]; nuclear membrane [GO:0031965]; nucleolus [GO:0005730]; plasma membrane [GO:0005886]
BEND3	Q5T5X7	heterochromatin [GO:0000792]; nucleolus [GO:0005730]; nucleoplasm [GO:0005654]
RBM26	Q5T8P6	nucleus [GO:0005634]
KIAA0368	Q5VYK3	centrosome [GO:0005813]; COPII-coated ER to Golgi transport vesicle [GO:0030134]; cytoplasm [GO:0005737]; cytoplasmic vesicle [GO:0031410]; early endosome [GO:0005769]; endocytic vesicle [GO:0030139]; endoplasmic reticulum [GO:0005783]; endoplasmic reticulum-Golgi intermediate compartment [GO:0005793]; late endosome [GO:0005770]; membrane [GO:0016020]; multivesicular body [GO:0005771]; nucleoplas…
ZMYM4	Q5VZL5
TWF2	Q6IBS0	actin filament [GO:0005884]; cytoplasm [GO:0005737]; extracellular exosome [GO:0070062]; filopodium [GO:0030175]; growth cone [GO:0030426]; lamellipodium [GO:0030027]; myofibril [GO:0030016]; perinuclear region of cytoplasm [GO:0048471]; stereocilium [GO:0032420]
ADNP2	Q6IQ32	chromatin [GO:0000785]; nucleus [GO:0005634]
HMBOX1	Q6NT76	Cajal body [GO:0015030]; centrosome [GO:0005813]; chromatin [GO:0000785]; chromosome, telomeric region [GO:0000781]; cytoplasm [GO:0005737]; cytosol [GO:0005829]; nuclear body [GO:0016604]; nucleoplasm [GO:0005654]; nucleus [GO:0005634]; PML body [GO:0016605]
PTRF	Q6NZI2	caveola [GO:0005901]; cytoplasm [GO:0005737]; cytosol [GO:0005829]; endoplasmic reticulum [GO:0005783]; intracellular membrane-bounded organelle [GO:0043231]; membrane raft [GO:0045121]; mitochondrion [GO:0005739]; nucleoplasm [GO:0005654]; nucleus [GO:0005634]; plasma membrane [GO:0005886]; protein-containing complex [GO:0032991]
NFRKB	Q6P4R8	Ino80 complex [GO:0031011]; nucleoplasm [GO:0005654]; nucleus [GO:0005634]
ELMSAN1	Q6PJG2	histone deacetylase complex [GO:0000118]; nucleoplasm [GO:0005654]; transcription regulator complex [GO:0005667]
FIP1L1	Q6UN15	cytosol [GO:0005829]; mRNA cleavage and polyadenylation specificity factor complex [GO:0005847]; nucleoplasm [GO:0005654]
RSRC2	Q7L4I2
SETX	Q7Z333	axon [GO:0030424]; chromosome, telomeric region [GO:0000781]; cytoplasm [GO:0005737]; growth cone [GO:0030426]; intercellular bridge [GO:0045171]; nuclear body [GO:0016604]; nuclear chromosome [GO:0000228]; nucleolus [GO:0005730]; nucleoplasm [GO:0005654]; nucleus [GO:0005634]
RAI1	Q7Z5J4	cytoplasm [GO:0005737]; nucleoplasm [GO:0005654]; nucleus [GO:0005634]
PBRM1	Q86U86	chromatin [GO:0000785]; kinetochore [GO:0000776]; nuclear chromosome [GO:0000228]; nuclear matrix [GO:0016363]; nucleoplasm [GO:0005654]; nucleus [GO:0005634]; RSC-type complex [GO:0016586]; SWI/SNF complex [GO:0016514]
CCAR1	Q8IX12	nuclear envelope lumen [GO:0005641]; nucleoplasm [GO:0005654]; nucleus [GO:0005634]; perinuclear region of cytoplasm [GO:0048471]
SRRM1	Q8IYB3	catalytic step 2 spliceosome [GO:0071013]; cytosol [GO:0005829]; nuclear matrix [GO:0016363]; nuclear speck [GO:0016607]; nucleoplasm [GO:0005654]; nucleus [GO:0005634]; spliceosomal complex [GO:0005681]
FNBP4	Q8N3X1	nucleoplasm [GO:0005654]
SRBD1	Q8N5C6
SERBP1	Q8NC51	cytoplasm [GO:0005737]; cytosol [GO:0005829]; extracellular exosome [GO:0070062]; membrane [GO:0016020]; nucleus [GO:0005634]; perinuclear region of cytoplasm [GO:0048471]
SNIP1	Q8TAD8	cytosol [GO:0005829]; nucleoplasm [GO:0005654]; nucleus [GO:0005634]; spliceosomal complex [GO:0005681]; U2 snRNP [GO:0005686]; U2-type precatalytic spliceosome [GO:0071005]
PHIP	Q8WWQ0	nucleus [GO:0005634]
RREB1	Q92766	cytoplasm [GO:0005737]; extracellular exosome [GO:0070062]; fibrillar center [GO:0001650]; nuclear body [GO:0016604]; nuclear speck [GO:0016607]; nucleus [GO:0005634]
SYMPK	Q92797	bicellular tight junction [GO:0005923]; cytoplasm [GO:0005737]; cytoskeleton [GO:0005856]; cytosol [GO:0005829]; mRNA cleavage and polyadenylation specificity factor complex [GO:0005847]; nuclear body [GO:0016604]; nuclear stress granule [GO:0097165]; nucleoplasm [GO:0005654]; plasma membrane [GO:0005886]
DDX17	Q92841	cytoplasm [GO:0005737]; cytosol [GO:0005829]; membrane [GO:0016020]; nuclear speck [GO:0016607]; nucleolus [GO:0005730]; nucleoplasm [GO:0005654]; nucleus [GO:0005634]; ribonucleoprotein complex [GO:1990904]
KHSRP	Q92945	cytoplasm [GO:0005737]; cytosol [GO:0005829]; membrane [GO:0016020]; nucleoplasm [GO:0005654]; nucleus [GO:0005634]
LPP	Q93052	cytosol [GO:0005829]; focal adhesion [GO:0005925]; nucleus [GO:0005634]; plasma membrane [GO:0005886]; stress fiber [GO:0001725]
SMARCE1	Q969G3	bBAF complex [GO:0140092]; brahma complex [GO:0035060]; chromatin [GO:0000785]; kinetochore [GO:0000776]; nBAF complex [GO:0071565]; npBAF complex [GO:0071564]; nuclear chromosome [GO:0000228]; nuclear matrix [GO:0016363]; nucleoplasm [GO:0005654]; nucleus [GO:0005634]; protein-containing complex [GO:0032991]; RSC-type complex [GO:0016586]; SWI/SNF complex [GO:0016514]
L3MBTL2	Q969R5	nucleoplasm [GO:0005654]; nucleus [GO:0005634]
ZBTB9	Q96C00	nucleus [GO:0005634]
FAM122A	Q96E09	cytoplasm [GO:0005737]; nuclear body [GO:0016604]; nucleoplasm [GO:0005654]; nucleus [GO:0005634]
THOC1	Q96FV9	cytoplasm [GO:0005737]; nuclear matrix [GO:0016363]; nuclear speck [GO:0016607]; nucleoplasm [GO:0005654]; nucleus [GO:0005634]; THO complex [GO:0000347]; THO complex part of transcription export complex [GO:0000445]; transcription export complex [GO:0000346]
PDLIM5	Q96HC4	actin cytoskeleton [GO:0015629]; adherens junction [GO:0005912]; cell projection [GO:0042995]; cytosol [GO:0005829]; filamentous actin [GO:0031941]; membrane [GO:0016020]; postsynaptic density [GO:0014069]; presynapse [GO:0098793]; stress fiber [GO:0001725]; Z disc [GO:0030018]
INTS4	Q96HW7	integrator complex [GO:0032039]; nucleolus [GO:0005730]; nucleoplasm [GO:0005654]; nucleus [GO:0005634]
CCDC132	Q96JG6	EARP complex [GO:1990745]; extracellular exosome [GO:0070062]; membrane [GO:0016020]; perinuclear region of cytoplasm [GO:0048471]; recycling endosome [GO:0055037]
ZNF462	Q96JM2	nucleoplasm [GO:0005654]; nucleus [GO:0005634]
CCDC43	Q96MW1	cytosol [GO:0005829]
NACC1	Q96RE7	cell junction [GO:0030054]; cytoplasm [GO:0005737]; intracellular membrane-bounded organelle [GO:0043231]; nucleoplasm [GO:0005654]; nucleus [GO:0005634]
RSF1	Q96T23	nucleoplasm [GO:0005654]; nucleus [GO:0005634]; RSF complex [GO:0031213]
SCAF11	Q99590	nuclear body [GO:0016604]; nucleolus [GO:0005730]; nucleoplasm [GO:0005654]
HNRNPUL1	Q9BUJ2	nucleoplasm [GO:0005654]; nucleus [GO:0005634]; ribonucleoprotein complex [GO:1990904]; synapse [GO:0045202]
MKI67IP	Q9BYG3	chromosome [GO:0005694]; condensed nuclear chromosome [GO:0000794]; cytoplasm [GO:0005737]; nucleolus [GO:0005730]; nucleoplasm [GO:0005654]
WDR12	Q9GZL7	nucleolus [GO:0005730]; nucleoplasm [GO:0005654]; PeBoW complex [GO:0070545]; preribosome, large subunit precursor [GO:0030687]
BRD8	Q9H0E9	mitochondrion [GO:0005739]; NuA4 histone acetyltransferase complex [GO:0035267]; nucleoplasm [GO:0005654]; nucleosome [GO:0000786]; nucleus [GO:0005634]; Swr1 complex [GO:0000812]
PNN	Q9H307	catalytic step 2 spliceosome [GO:0071013]; cell-cell junction [GO:0005911]; desmosome [GO:0030057]; intermediate filament [GO:0005882]; membrane [GO:0016020]; nuclear speck [GO:0016607]; nucleoplasm [GO:0005654]; plasma membrane [GO:0005886]
ZNF644	Q9H582	nucleus [GO:0005634]
BCAS3	Q9H6U6	cell leading edge [GO:0031252]; cytoplasm [GO:0005737]; cytoplasmic microtubule [GO:0005881]; euchromatin [GO:0000791]; intermediate filament cytoskeleton [GO:0045111]; nucleus [GO:0005634]; phagophore assembly site [GO:0000407]
EHMT1	Q9H9B1	chromatin [GO:0000785]; nuclear body [GO:0016604]; nucleoplasm [GO:0005654]; nucleus [GO:0005634]
MEAF6	Q9HAF1	histone acetyltransferase complex [GO:0000123]; kinetochore [GO:0000776]; MOZ/MORF histone acetyltransferase complex [GO:0070776]; NuA4 histone acetyltransferase complex [GO:0035267]; nucleolus [GO:0005730]; nucleoplasm [GO:0005654]; nucleosome [GO:0000786]; nucleus [GO:0005634]
ZBTB20	Q9HC78	cytoplasm [GO:0005737]; nuclear body [GO:0016604]; nucleoplasm [GO:0005654]; nucleus [GO:0005634]
PALMD	Q9NP74	cytoplasm [GO:0005737]; dendritic spine [GO:0043197]; membrane [GO:0016020]
ANLN	Q9NQW6	actin cytoskeleton [GO:0015629]; actomyosin contractile ring [GO:0005826]; bleb [GO:0032059]; cell cortex [GO:0005938]; cytosol [GO:0005829]; midbody [GO:0030496]; nucleoplasm [GO:0005654]
DDX21	Q9NR30	B-WICH complex [GO:0110016]; chromosome [GO:0005694]; cytosol [GO:0005829]; membrane [GO:0016020]; mitochondrion [GO:0005739]; nucleolus [GO:0005730]; nucleoplasm [GO:0005654]
DDX19A	Q9NUU7	cytoplasmic stress granule [GO:0010494]; membrane [GO:0016020]; nucleoplasm [GO:0005654]; nucleus [GO:0005634]
GNL3L	Q9NVN8	cytosol [GO:0005829]; membrane [GO:0016020]; nucleolus [GO:0005730]; nucleoplasm [GO:0005654]; telomerase holoenzyme complex [GO:0005697]
POLR3E	Q9NVU0	cytosol [GO:0005829]; nucleoplasm [GO:0005654]; RNA polymerase III complex [GO:0005666]
NHP2	Q9NX24	box H/ACA scaRNP complex [GO:0072589]; box H/ACA snoRNP complex [GO:0031429]; box H/ACA telomerase RNP complex [GO:0090661]; chromosome, telomeric region [GO:0000781]; nucleoplasm [GO:0005654]; sno(s)RNA-containing ribonucleoprotein complex [GO:0005732]; telomerase holoenzyme complex [GO:0005697]
CDKN2AIP	Q9NXV6	granular component [GO:0001652]; nucleolus [GO:0005730]; nucleoplasm [GO:0005654]
DDX21	Q9NY93	cytosol [GO:0005829]; membrane [GO:0016020]; nucleolus [GO:0005730]; nucleus [GO:0005634]
BCLAF1	Q9NYF8	cytoplasm [GO:0005737]; mediator complex [GO:0016592]; nuclear speck [GO:0016607]; nucleoplasm [GO:0005654]; nucleus [GO:0005634]
TMOD3	Q9NYL9	adherens junction [GO:0005912]; striated muscle thin filament [GO:0005865]
RRBP1	Q9P2E9	endoplasmic reticulum [GO:0005783]; endoplasmic reticulum membrane [GO:0005789]; membrane [GO:0016020]; ribosome [GO:0005840]
UBA2	Q9UBT2	cytoplasm [GO:0005737]; nucleoplasm [GO:0005654]; SUMO activating enzyme complex [GO:0031510]
TCF20	Q9UGU0	nuclear body [GO:0016604]; nucleoplasm [GO:0005654]; nucleus [GO:0005634]
EBF1	Q9UH73	chromatin [GO:0000785]; nucleus [GO:0005634]
TRPS1	Q9UHF7	chromatin [GO:0000785]; nucleoplasm [GO:0005654]; nucleus [GO:0005634]; protein-containing complex [GO:0032991]
BAZ1B	Q9UIG0	B-WICH complex [GO:0110016]; condensed chromosome [GO:0000793]; nucleolus [GO:0005730]; nucleoplasm [GO:0005654]; nucleus [GO:0005634]; pericentric heterochromatin [GO:0005721]; WICH complex [GO:0090535]
GMEB2	Q9UKD1	chromatin [GO:0000785]; cytosol [GO:0005829]; nucleoplasm [GO:0005654]; nucleus [GO:0005634]
ACIN1	Q9UKV3	ASAP complex [GO:0061574]; cytosol [GO:0005829]; nuclear speck [GO:0016607]; nucleoplasm [GO:0005654]; nucleus [GO:0005634]; plasma membrane [GO:0005886]
MKL2	Q9ULH7	nucleus [GO:0005634]
ZBTB21	Q9ULJ3	cytosol [GO:0005829]; nucleoplasm [GO:0005654]; nucleus [GO:0005634]
YEATS2	Q9ULM3	ATAC complex [GO:0140672]; mitotic spindle [GO:0072686]; NuA4 histone acetyltransferase complex [GO:0035267]; nucleus [GO:0005634]
TRIM33	Q9UPN9	nucleoplasm [GO:0005654]; nucleus [GO:0005634]
ZNF148	Q9UQR1	Golgi apparatus [GO:0005794]; nucleoplasm [GO:0005654]
RUVBL1	Q9Y265	cytosol [GO:0005829]; dynein axonemal particle [GO:0120293]; extracellular exosome [GO:0070062]; Ino80 complex [GO:0031011]; membrane [GO:0016020]; microtubule organizing center [GO:0005815]; MLL1 complex [GO:0071339]; NuA4 histone acetyltransferase complex [GO:0035267]; nuclear matrix [GO:0016363]; nucleoplasm [GO:0005654]; nucleosome [GO:0000786]; nucleus [GO:0005634]; protein folding chaperone…
AKAP2	Q9Y2D5
THRAP3	Q9Y2W1	extracellular exosome [GO:0070062]; mediator complex [GO:0016592]; nuclear speck [GO:0016607]; nucleoplasm [GO:0005654]; nucleus [GO:0005634]
NOP58	Q9Y2X3	box C/D RNP complex [GO:0031428]; Cajal body [GO:0015030]; cytosol [GO:0005829]; fibrillar center [GO:0001650]; membrane [GO:0016020]; nucleolus [GO:0005730]; nucleoplasm [GO:0005654]; pre-snoRNP complex [GO:0070761]; small-subunit processome [GO:0032040]; sno(s)RNA-containing ribonucleoprotein complex [GO:0005732]
SUGT1	Q9Y2Z0	cytosol [GO:0005829]; kinetochore [GO:0000776]; nucleus [GO:0005634]; protein-containing complex [GO:0032991]; ubiquitin ligase complex [GO:0000151]
RRP15	Q9Y3B9	preribosome, large subunit precursor [GO:0030687]
ZNF451	Q9Y4E5	nucleus [GO:0005634]; PML body [GO:0016605]
PAXBP1	Q9Y5B6	cytosol [GO:0005829]; nucleus [GO:0005634]

## Sheet: Lili Cai, 2017-Sites
Gene	Position
Rangap1	526
Mdc1	1462
Trim28	779
Sumo1	7
Zmym4	250
Mdc1	1471
Zbtb46	470
Zbtb46	472
Trp53bp1	1431
Trim28	575
Safb	316
Ranbp2	2627
Top1	119
Mdc1	1314
Snip1	28
Hist1h2ba	7
Trim33	789
Mdc1	1326
Eid3	29
Ccar1	1008
Med13	152
Zmym4	273
Safb	373
H2afx	135
Usp7	870
Kdm5b	278
Vps39	845
Zbtb20	257
Sox30	242
BC016423	1125
Zbtb2	505
Morc3	657
Sumo1	39
Mdc1	948
Srrm1	249
Mdc1	1081
Ranbp2	1695
Vmn2r116	56
Kdm5b	242
Brd8	582
Parp1	468
Hnrnpul1	117
Snrpa1	160
Snrpa1	165
Sox30	336
Plcb4	3
Nxf7	371
Tex24	115
Gzmg	176
Gzmg	177
Uba2	164
Uba2	418
Ppp2cb	21
Mtus1	251
Mtus1	252
Chd8	1009
Chd8	1015
Trim33	806
Zbtb21	707
Lrrk2	2523
Ranbp2	2424
Ranbp2	2666
Sall1	63
Sall1	67
Cyth3	27
Cyth3	28
Usp39	72
4931406P16Rik	625
Slc43a2	410
Slc43a2	412
Smc3	180
Ptprt	386
Akap1	135
Prss44	261
Pnn	537
Rptn	718
Abce1	63
Scml2	362
Gtf2i	951
Slc16a5	299
Pds5a	1250
Pds5a	1254
Map4k5	658
Grik3	796
Mdc1	1157
Dtx3l	220
Pik3c2a	296
Ccdc174	121
Ccdc174	123
Smchd1	1977
Vmn2r82	338
Vmn2r82	339
Vmn1r67	117
Hist1h2bc	6
Idh1	159
Arhgef7	612
Arhgef7	613
Ankrd32	402
Trim28	750
Als2	492
Sumo2	7
Myh8	1540
Olfr1182	126
Iars	24
Fam227a	365
Ccdc175	251
Rab11fip2	269
9830001H06Rik	1156
Pls3	68
Pls3	71
Gemin5	265
Rad18	115
Tmem184c	544
Tmem184c	548
Scaf8	81
Uba52	63
Tcof1	521
Zmynd11	125
Fhl4	5
Gm17252	3
Tspan2	168
Rph3al	122
Htt	6
Senp6	1030
Pik3c2g	58
Fyco1	1301
Supt7l	274
Unc13d	798
Dopey2	217
Iqcf3	189
Iqcf3	193
Fbp1	314

## Sheet: Lili Cai, 2017-Proteins
Gene	Kinase	TF
Rangap1	no	no
Mdc1	no	no
Trim28	no	yes
Sumo1	no	no
Zmym4	no	no
Zbtb46	no	no
Trp53bp1	no	yes
Safb	no	no
Ranbp2	no	no
Top1	no	no
Snip1	no	no
Hist1h2ba	no	no
Trim33	no	no
Eid3	no	no
Ccar1	no	no
Med13	no	no
H2afx	no	no
Usp7	no	no
Kdm5b	no	no
Vps39	no	no
Zbtb20	no	yes
Sox30	no	no
BC016423	no	no
Zbtb2	no	yes
Morc3	no	no
Srrm1	no	no
Vmn2r116	no	no
Brd8	no	no
Parp1	no	yes
Hnrnpul1	no	no
Snrpa1	no	no
Plcb4	no	no
Nxf7	no	no
Tex24	no	no
Gzmg	no	no
Uba2	no	no
Ppp2cb	no	no
Mtus1	no	no
Chd8	no	yes
Zbtb21	no	no
Lrrk2	yes	no
Sall1	no	yes
Cyth3	no	no
Usp39	no	no
4931406P16Rik	no	no
Slc43a2	no	no
Smc3	no	no
Ptprt	no	no
Akap1	no	no
Prss44	no	no
Pnn	no	yes
Rptn	no	no
Abce1	no	no
Scml2	no	no
Gtf2i	no	yes
Slc16a5	no	no
Pds5a	no	no
Map4k5	no	no
Grik3	no	no
Dtx3l	no	no
Pik3c2a	no	no
Ccdc174	no	no
Smchd1	no	no
Vmn2r82	no	no
Vmn1r67	no	no
Hist1h2bc	no	no
Idh1	no	no
Arhgef7	no	no
Ankrd32	no	no
Als2	no	no
Sumo2	no	no
Myh8	no	no
Olfr1182	no	no
Iars	no	no
Fam227a	no	no
Ccdc175	no	no
Rab11fip2	no	no
9830001H06Rik	no	no
Pls3	no	no
Gemin5	no	no
Rad18	no	no
Tmem184c	no	no
Scaf8	no	no
Uba52	no	no
Tcof1	no	no
Zmynd11	no	no
Fhl4	no	no
Gm17252	no	no
Tspan2	no	no
Rph3al	no	no
Htt	no	no
Senp6	no	no
Pik3c2g	no	no
Fyco1	no	no
Supt7l	no	no
Unc13d	no	no
Dopey2	no	no
Iqcf3	no	no
Fbp1	no	no

## Sheet: Cellular Component_Cai
Gene	Uniprot	Gene Ontology (cellular component)
Rangap1	P46061	aggresome [GO:0016235]; axon cytoplasm [GO:1904115]; cytoplasm [GO:0005737]; cytoplasmic periphery of the nuclear pore complex [GO:1990723]; cytosol [GO:0005829]; dendrite [GO:0030425]; intracellular membrane-bounded organelle [GO:0043231]; kinetochore [GO:0000776]; mitotic spindle [GO:0072686]; nuclear envelope [GO:0005635]; nuclear membrane [GO:0031965]; nuclear pore [GO:0005643]; nuclear pore …
Mdc1	Q5PSV9	chromosome [GO:0005694]; focal adhesion [GO:0005925]; nuclear body [GO:0016604]; nucleoplasm [GO:0005654]; nucleus [GO:0005634]
Trim28	Q62318	chromatin [GO:0000785]; euchromatin [GO:0000791]; heterochromatin [GO:0000792]; nucleoplasm [GO:0005654]; nucleus [GO:0005634]; protein-containing complex [GO:0032991]; RNA polymerase II transcription regulator complex [GO:0090575]
Sumo1	P63166	cytoplasm [GO:0005737]; dendrite [GO:0030425]; fibrillar center [GO:0001650]; heterochromatin [GO:0000792]; nuclear body [GO:0016604]; nuclear membrane [GO:0031965]; nuclear speck [GO:0016607]; nuclear stress granule [GO:0097165]; nucleolus [GO:0005730]; nucleoplasm [GO:0005654]; nucleus [GO:0005634]; plasma membrane [GO:0005886]; PML body [GO:0016605]; synapse [GO:0045202]; voltage-gated potassi…
Zmym4	A2A791
Zbtb46	Q8BID6	chromatin [GO:0000785]; nucleus [GO:0005634]
Trp53bp1	P70399	chromosome, telomeric region [GO:0000781]; cytoplasm [GO:0005737]; DNA repair complex [GO:1990391]; kinetochore [GO:0000776]; nuclear body [GO:0016604]; nucleoplasm [GO:0005654]; nucleus [GO:0005634]; replication fork [GO:0005657]; site of double-strand break [GO:0035861]
Safb	D3YXK2	midbody [GO:0030496]; nucleoplasm [GO:0005654]; nucleus [GO:0005634]
Ranbp2	Q9ERU9	annulate lamellae [GO:0005642]; cytoplasm [GO:0005737]; cytoplasmic periphery of the nuclear pore complex [GO:1990723]; intracellular membrane-bounded organelle [GO:0043231]; nuclear envelope [GO:0005635]; nuclear inclusion body [GO:0042405]; nuclear membrane [GO:0031965]; nuclear pore [GO:0005643]; nuclear pore cytoplasmic filaments [GO:0044614]; nuclear pore nuclear basket [GO:0044615]; nucleop…
Top1	Q04750	cytoplasm [GO:0005737]; dense fibrillar component [GO:0001651]; fibrillar center [GO:0001650]; male germ cell nucleus [GO:0001673]; nuclear chromosome [GO:0000228]; nucleolus [GO:0005730]; nucleoplasm [GO:0005654]; nucleus [GO:0005634]; P-body [GO:0000932]; perikaryon [GO:0043204]; protein-DNA complex [GO:0032993]
Snip1	Q8BIZ6	cytosol [GO:0005829]; nucleoplasm [GO:0005654]; nucleus [GO:0005634]; U2-type precatalytic spliceosome [GO:0071005]
Hist1h2ba	P70696	cell surface [GO:0009986]; female germ cell nucleus [GO:0001674]; nucleoplasm [GO:0005654]; nucleosome [GO:0000786]; nucleus [GO:0005634]
Trim33	Q99PP7	nucleoplasm [GO:0005654]; nucleus [GO:0005634]
Eid3	Q3V124	chromosome, telomeric region [GO:0000781]; cytoplasm [GO:0005737]; nucleolus [GO:0005730]; nucleoplasm [GO:0005654]; nucleus [GO:0005634]; Smc5-Smc6 complex [GO:0030915]
Ccar1	Q8CH18	nuclear envelope lumen [GO:0005641]; nucleus [GO:0005634]; perinuclear region of cytoplasm [GO:0048471]
Med13	Q5SWW4	mediator complex [GO:0016592]; nucleoplasm [GO:0005654]; nucleus [GO:0005634]
H2afx	P27661	centrosome [GO:0005813]; chromatin [GO:0000785]; chromosome [GO:0005694]; chromosome, telomeric region [GO:0000781]; condensed nuclear chromosome [GO:0000794]; male germ cell nucleus [GO:0001673]; nuclear speck [GO:0016607]; nucleoplasm [GO:0005654]; nucleosome [GO:0000786]; nucleus [GO:0005634]; replication fork [GO:0005657]; site of DNA damage [GO:0090734]; site of double-strand break [GO:00358…
Usp7	Q6A4J8	cytoplasm [GO:0005737]; cytosol [GO:0005829]; nucleus [GO:0005634]; PML body [GO:0016605]; protein-containing complex [GO:0032991]; XY body [GO:0001741]
Kdm5b	Q80Y84	cytosol [GO:0005829]; nucleoplasm [GO:0005654]; nucleus [GO:0005634]
Vps39	Q8R5L3	cytoplasm [GO:0005737]; HOPS complex [GO:0030897]; late endosome [GO:0005770]; late endosome membrane [GO:0031902]; lysosomal HOPS complex [GO:1902501]; lysosomal membrane [GO:0005765]; membrane [GO:0016020]
Zbtb20	Q8K0L9	cytoplasm [GO:0005737]; nuclear body [GO:0016604]; nucleoplasm [GO:0005654]; nucleus [GO:0005634]
Sox30	Q8CGW4	chromocenter [GO:0010369]; cytoplasm [GO:0005737]; cytosol [GO:0005829]; intracellular membrane-bounded organelle [GO:0043231]; nucleoplasm [GO:0005654]; nucleus [GO:0005634]
Morc3	F7BJB9	chromatin [GO:0000785]; nuclear matrix [GO:0016363]; nucleoplasm [GO:0005654]; nucleus [GO:0005634]; PML body [GO:0016605]
Srrm1	Q52KI8	catalytic step 2 spliceosome [GO:0071013]; nuclear matrix [GO:0016363]; nuclear speck [GO:0016607]; spliceosomal complex [GO:0005681]
Vmn2r116	E9Q6I0	plasma membrane [GO:0005886]
Brd8	Q8R3B7	mitochondrion [GO:0005739]; NuA4 histone acetyltransferase complex [GO:0035267]; nucleoplasm [GO:0005654]; nucleosome [GO:0000786]; nucleus [GO:0005634]; Swr1 complex [GO:0000812]
Parp1	P11103	chromatin [GO:0000785]; cytoplasm [GO:0005737]; cytosol [GO:0005829]; mitochondrion [GO:0005739]; nuclear body [GO:0016604]; nuclear envelope [GO:0005635]; nuclear replication fork [GO:0043596]; nucleolus [GO:0005730]; nucleoplasm [GO:0005654]; nucleus [GO:0005634]; protein-containing complex [GO:0032991]; protein-DNA complex [GO:0032993]; site of DNA damage [GO:0090734]; site of double-strand br…
Hnrnpul1	Q8VDM6	nucleoplasm [GO:0005654]; nucleus [GO:0005634]; ribonucleoprotein complex [GO:1990904]; synapse [GO:0045202]
Snrpa1	P57784	catalytic step 2 spliceosome [GO:0071013]; nuclear body [GO:0016604]; nuclear speck [GO:0016607]; nucleoplasm [GO:0005654]; nucleus [GO:0005634]; spliceosomal complex [GO:0005681]; U2 snRNP [GO:0005686]; U2-type catalytic step 2 spliceosome [GO:0071007]; U2-type precatalytic spliceosome [GO:0071005]
Tex24	Q5DP50	nucleus [GO:0005634]; transcription factor TFIIK complex [GO:0070985]
Gzmg	P13366	cytolytic granule [GO:0044194]; cytoplasm [GO:0005737]; intracellular membrane-bounded organelle [GO:0043231]
Uba2	Q9Z1F9	cytoplasm [GO:0005737]; nucleoplasm [GO:0005654]; SUMO activating enzyme complex [GO:0031510]
Ppp2cb	P62715	chromosome, centromeric region [GO:0000775]; cytoplasm [GO:0005737]; cytosol [GO:0005829]; nucleus [GO:0005634]; protein phosphatase type 2A complex [GO:0000159]; spindle pole [GO:0000922]
Mtus1	Q5HZI1	cytoplasm [GO:0005737]; Golgi apparatus [GO:0005794]; microtubule cytoskeleton [GO:0015630]; mitochondrion [GO:0005739]; nucleolus [GO:0005730]; nucleus [GO:0005634]; plasma membrane [GO:0005886]
Chd8	Q09XV5	chromatin [GO:0000785]; MLL1 complex [GO:0071339]; nucleoplasm [GO:0005654]; nucleus [GO:0005634]; protein-containing complex [GO:0032991]
Lrrk2	Q5S006	amphisome [GO:0044753]; autolysosome [GO:0044754]; axon [GO:0030424]; basolateral plasma membrane [GO:0016323]; caveola neck [GO:0099400]; cytoplasm [GO:0005737]; cytoplasmic side of mitochondrial outer membrane [GO:0032473]; cytoplasmic vesicle [GO:0031410]; cytoskeleton [GO:0005856]; cytosol [GO:0005829]; dendrite [GO:0030425]; dendrite cytoplasm [GO:0032839]; endoplasmic reticulum [GO:0005783]…
Sall1	Q9ER74	chromocenter [GO:0010369]; cytoplasm [GO:0005737]; heterochromatin [GO:0000792]; nucleus [GO:0005634]; NuRD complex [GO:0016581]
Cyth3	O08967	adherens junction [GO:0005912]; bicellular tight junction [GO:0005923]; cytoplasm [GO:0005737]; cytosol [GO:0005829]; extrinsic component of cytoplasmic side of plasma membrane [GO:0031234]; nucleoplasm [GO:0005654]; plasma membrane [GO:0005886]; ruffle [GO:0001726]
Usp39	Q3TIX9	nucleoplasm [GO:0005654]; nucleus [GO:0005634]; spliceosomal complex [GO:0005681]; U4/U6 x U5 tri-snRNP complex [GO:0046540]
Slc43a2	Q8CGA3	basolateral plasma membrane [GO:0016323]; plasma membrane [GO:0005886]
Smc3	Q9CW03	basement membrane [GO:0005604]; chromatin [GO:0000785]; chromosome, centromeric region [GO:0000775]; cohesin complex [GO:0008278]; lateral element [GO:0000800]; meiotic cohesin complex [GO:0030893]; mitotic spindle pole [GO:0097431]; nuclear matrix [GO:0016363]; nucleoplasm [GO:0005654]; nucleus [GO:0005634]; synaptonemal complex [GO:0000795]
Ptprt	Q99M80	cell surface [GO:0009986]; glutamatergic synapse [GO:0098978]; plasma membrane [GO:0005886]; postsynaptic density membrane [GO:0098839]
Akap1	O08715	endoplasmic reticulum [GO:0005783]; lipid droplet [GO:0005811]; mitochondrial crista [GO:0030061]; mitochondrial outer membrane [GO:0005741]; mitochondrion [GO:0005739]; neuromuscular junction [GO:0031594]; postsynaptic membrane [GO:0045211]; postsynaptic specialization, intracellular component [GO:0099091]
Prss44	Q402U7	cytoplasm [GO:0005737]; extracellular space [GO:0005615]; membrane [GO:0016020]
Pnn	O35691	catalytic step 2 spliceosome [GO:0071013]; cytoplasm [GO:0005737]; desmosome [GO:0030057]; exon-exon junction complex [GO:0035145]; nuclear speck [GO:0016607]
Rptn	P97347	cornified envelope [GO:0001533]; extracellular region [GO:0005576]
Abce1	P61222	cytoplasm [GO:0005737]; cytosol [GO:0005829]; cytosolic ribosome [GO:0022626]; mitochondrion [GO:0005739]
Gtf2i	Q9ESZ8	cytoplasm [GO:0005737]; nucleoplasm [GO:0005654]; nucleus [GO:0005634]
Slc16a5	G5E8K6	plasma membrane [GO:0005886]
Pds5a	Q6A026	chromatin [GO:0000785]; nucleoplasm [GO:0005654]; nucleus [GO:0005634]; plasma membrane [GO:0005886]
Map4k5	Q8BPM2	cytoplasm [GO:0005737]; cytosol [GO:0005829]; plasma membrane [GO:0005886]
Grik3	B1AS29	axon [GO:0030424]; dendrite [GO:0030425]; dendrite cytoplasm [GO:0032839]; glutamatergic synapse [GO:0098978]; kainate selective glutamate receptor complex [GO:0032983]; perikaryon [GO:0043204]; plasma membrane [GO:0005886]; postsynaptic density membrane [GO:0098839]; presynaptic membrane [GO:0042734]; terminal bouton [GO:0043195]
Dtx3l	Q3UIR3	cytoplasm [GO:0005737]; cytosol [GO:0005829]; early endosome [GO:0005769]; early endosome membrane [GO:0031901]; lysosomal membrane [GO:0005765]; lysosome [GO:0005764]; nucleoplasm [GO:0005654]; nucleus [GO:0005634]; protein-containing complex [GO:0032991]
Pik3c2a	Q61194	clathrin-coated vesicle [GO:0030136]; cytoplasm [GO:0005737]; cytosol [GO:0005829]; intracellular membrane-bounded organelle [GO:0043231]; nucleoplasm [GO:0005654]; phosphatidylinositol 3-kinase complex [GO:0005942]; plasma membrane [GO:0005886]; trans-Golgi network [GO:0005802]; vesicle [GO:0031982]
Ccdc174	Q3U155	nucleoplasm [GO:0005654]; nucleus [GO:0005634]
Smchd1	Q6P5D8	Barr body [GO:0001740]; chromosome, telomeric region [GO:0000781]; site of double-strand break [GO:0035861]
Hist1h2bc	Q6ZWY9	cytosol [GO:0005829]; extracellular space [GO:0005615]; nucleoplasm [GO:0005654]; nucleosome [GO:0000786]; nucleus [GO:0005634]
Idh1	O88844	cytoplasm [GO:0005737]; cytosol [GO:0005829]; mitochondrion [GO:0005739]; peroxisome [GO:0005777]
Arhgef7	Q9ES28	cell cortex [GO:0005938]; centrosome [GO:0005813]; cytoplasm [GO:0005737]; cytosol [GO:0005829]; focal adhesion [GO:0005925]; GABA-ergic synapse [GO:0098982]; growth cone [GO:0030426]; lamellipodium [GO:0030027]; membrane [GO:0016020]; mitotic spindle pole [GO:0097431]; neuron projection [GO:0043005]; neuronal cell body [GO:0043025]; plasma membrane [GO:0005886]; postsynapse [GO:0098794]; postsyn…
Ankrd32	Q8R3P9	centrosome [GO:0005813]; cytoplasm [GO:0005737]; nuclear inclusion body [GO:0042405]; nucleoplasm [GO:0005654]; nucleosome [GO:0000786]; nucleus [GO:0005634]; site of double-strand break [GO:0035861]
Als2	Q920R0	axon [GO:0030424]; centrosome [GO:0005813]; cytoplasm [GO:0005737]; cytosol [GO:0005829]; dendrite [GO:0030425]; dendritic spine [GO:0043197]; early endosome [GO:0005769]; growth cone [GO:0030426]; intracellular membrane-bounded organelle [GO:0043231]; lamellipodium [GO:0030027]; membrane [GO:0016020]; neuron projection [GO:0043005]; neuronal cell body [GO:0043025]; nucleus [GO:0005634]; postsyna…
Sumo2	P61957	nucleoplasm [GO:0005654]; nucleus [GO:0005634]; PML body [GO:0016605]
Myh8	P13542	cytoplasm [GO:0005737]; myofibril [GO:0030016]; myosin complex [GO:0016459]; myosin filament [GO:0032982]; myosin II complex [GO:0016460]
Iars	Q8BU30	aminoacyl-tRNA synthetase multienzyme complex [GO:0017101]; cytoplasm [GO:0005737]; cytosol [GO:0005829]; nucleoplasm [GO:0005654]
Ccdc175	E9PVB3
Rab11fip2	G3XA57	endosome [GO:0005768]; intracellular membrane-bounded organelle [GO:0043231]; nucleoplasm [GO:0005654]; phagocytic cup [GO:0001891]; recycling endosome membrane [GO:0055038]
Pls3	Q99K51	actin filament [GO:0005884]; actin filament bundle [GO:0032432]; cytoplasm [GO:0005737]; cytosol [GO:0005829]; neuromuscular junction [GO:0031594]; plasma membrane [GO:0005886]; stereocilium [GO:0032420]
Gemin5	Q8BX17	cytoplasm [GO:0005737]; cytosol [GO:0005829]; Gemini of coiled bodies [GO:0097504]; nuclear body [GO:0016604]; nucleoplasm [GO:0005654]; nucleus [GO:0005634]; SMN complex [GO:0032797]; SMN-Gemin2 complex [GO:0034718]; SMN-Sm protein complex [GO:0034719]
Rad18	Q9QXK2	centrosome [GO:0005813]; chromatin [GO:0000785]; cytoplasm [GO:0005737]; male germ cell nucleus [GO:0001673]; nuclear body [GO:0016604]; nuclear inclusion body [GO:0042405]; nucleoplasm [GO:0005654]; nucleus [GO:0005634]; Rad6-Rad18 complex [GO:0097505]; replication fork [GO:0005657]; site of double-strand break [GO:0035861]; XY body [GO:0001741]
Tmem184c	Q3TPR7	membrane [GO:0016020]
Scaf8	Q6DID3	cytoplasm [GO:0005737]; mRNA cleavage factor complex [GO:0005849]; nuclear matrix [GO:0016363]; nucleoplasm [GO:0005654]; nucleus [GO:0005634]
Uba52	P62984	cytoplasm [GO:0005737]; cytosol [GO:0005829]; cytosolic large ribosomal subunit [GO:0022625]; cytosolic ribosome [GO:0022626]; cytosolic small ribosomal subunit [GO:0022627]; endoplasmic reticulum [GO:0005783]; myelin sheath [GO:0043209]; nucleoplasm [GO:0005654]; nucleus [GO:0005634]; plasma membrane [GO:0005886]; postsynapse [GO:0098794]; presynapse [GO:0098793]; ribosome [GO:0005840]; synapse …
Tcof1	O08784	cytosol [GO:0005829]; fibrillar center [GO:0001650]; nucleolus [GO:0005730]; nucleoplasm [GO:0005654]
Zmynd11	Q8R5C8	chromosome [GO:0005694]; nucleoplasm [GO:0005654]; nucleus [GO:0005634]
Tspan2	Q922J6	myelin sheath [GO:0043209]; nucleoplasm [GO:0005654]; plasma membrane [GO:0005886]
Rph3al	Q768S4	cytoplasm [GO:0005737]; presynapse [GO:0098793]; secretory granule [GO:0030141]; secretory granule membrane [GO:0030667]; synapse [GO:0045202]; transport vesicle membrane [GO:0030658]
Htt	P42859	autophagosome [GO:0005776]; axon [GO:0030424]; centriole [GO:0005814]; clathrin-coated vesicle [GO:0030136]; cytoplasm [GO:0005737]; cytoplasmic vesicle [GO:0031410]; cytoplasmic vesicle membrane [GO:0030659]; cytosol [GO:0005829]; dendrite [GO:0030425]; early endosome [GO:0005769]; endoplasmic reticulum [GO:0005783]; glutamatergic synapse [GO:0098978]; Golgi apparatus [GO:0005794]; inclusion bod…
Htt	Q60857	endomembrane system [GO:0012505]; endosome membrane [GO:0010008]; focal adhesion [GO:0005925]; membrane raft [GO:0045121]; neuron projection [GO:0043005]; plasma membrane [GO:0005886]; postsynaptic membrane [GO:0045211]; presynaptic membrane [GO:0042734]; serotonergic synapse [GO:0099154]; synapse [GO:0045202]
Senp6	Q6P7W0	cytoplasm [GO:0005737]; cytosol [GO:0005829]; nucleoplasm [GO:0005654]; nucleus [GO:0005634]
Pik3c2g	O70167	cytoplasm [GO:0005737]; extrinsic component of membrane [GO:0019898]; Golgi apparatus [GO:0005794]; nuclear envelope [GO:0005635]; phosphatidylinositol 3-kinase complex [GO:0005942]; plasma membrane [GO:0005886]
Fyco1	Q8VDC1	autophagosome [GO:0005776]; Golgi apparatus [GO:0005794]; intracellular membrane-bounded organelle [GO:0043231]; late endosome [GO:0005770]; lysosome [GO:0005764]
Supt7l	Q9CZV5	nucleoplasm [GO:0005654]; nucleus [GO:0005634]; SAGA complex [GO:0000124]
Unc13d	B2RUP2	cytosol [GO:0005829]; exocytic vesicle [GO:0070382]; intracellular membrane-bounded organelle [GO:0043231]; late endosome [GO:0005770]; lysosome [GO:0005764]; membrane [GO:0016020]; recycling endosome [GO:0055037]; Weibel-Palade body [GO:0033093]
Dopey2	Q3UHQ6	cytosol [GO:0005829]; early endosome membrane [GO:0031901]; endosome [GO:0005768]; Golgi membrane [GO:0000139]; trans-Golgi network [GO:0005802]
Iqcf3	Q9D498
Fbp1	P35846	apical plasma membrane [GO:0016324]; basolateral plasma membrane [GO:0016323]; brush border [GO:0005903]; brush border membrane [GO:0031526]; clathrin-coated vesicle [GO:0030136]; endosome [GO:0005768]; external side of plasma membrane [GO:0009897]; extracellular region [GO:0005576]; membrane [GO:0016020]; nucleus [GO:0005634]
Fbp1	Q9QXD6	cytoplasm [GO:0005737]; cytosol [GO:0005829]; extracellular space [GO:0005615]; nucleus [GO:0005634]

## Sheet: Li, 2021-Sites
Protein	Gene names	Position
A0A087WTD7	AKAP13	1394
A0A087WYM5	KIAA0586	495
A0A087WZT2	METTL7B	50
A0A087X1W2	PRMT1	32
H0YK04	ARHGAP5	111
H0YK04	ARHGAP5	116
A0A1B0GVV9	STXBP1	32
A8MSP2	RAB37	137
E7EUJ7	CAGE1	733
E9PB90	HK2	749
F6VUX8	CENPJ	394
J3KTP9	HYDIN	111
H3BUQ8	SCNN1B	47
H7BZG4	TTC23	116
H7BZL4	GPC1	213
H7C5L8	TP53BP2	55
P46060	RANGAP1	524
P46939	UTRN	984
P51451	BLK	13
P51451	BLK	18
Q15084	PDIA6	437
Q5T7V8	GORAB	162
Q5T7V8	GORAB	168
Q8IYF3	TEX11	599
Q8NB90	SPATA5	311
Q8NCX0	CCDC150	549
Q99650	OSMR	615
Q9H7Z3	NRDE2	81
Q9Y2V7	COG6	58
Q9Y4D1	DAAM1	489
A0A0A0MRN0	PRPF38B	310
A0A0A0MSM4	TANC1	456
A0A0A0MTS7	TTN	26586
A0A0C4DG17	RPSA	11
F8WEU2	PFKL	8
H7BXY3	DHX30	77
H7BXY3	DHX30	78
I3L3G5	ENPP7	59
O60477	BRINP1	645
O75663	TIPRL	267
P23193	TCEA1	84
P61956	SUMO2	11
Q13686	ALKBH1	381
Q6ZVC0	NYAP1	649
X6RD87	ZER1	102
Q8NFY4	SEMA6D	755
Q96FH0	MEF2BNB	9
Q9ULL5	PRR12	452
A0A087WU64	POLA1	1070
A0A087WYF1	LAMA2	164
A0A087WZJ0	EXPH5	11
A0A087X014	ZNF804A	771
A0A087X0H9	RBM26	4
K4DIA1	SCN5A	1818
A0A0G2JR20	SDCCAG8	165
A0A0G2JR20	SDCCAG8	169
A0A0G2JR20	SDCCAG8	170
A0A0U1RQD1	TIGAR	4
A0A1B0GWD8	SPEF2	952
A0A1C7CYX9	DPYSL2	528
A1Z1Q3	MACROD2	306
A6NE76	CUL4B	9
A6NEN9	CXorf65	50
A6NHN2	RC3H2	320
E9PJK4	ARHGAP42	262
F5H586	BNC2	577
C9J088	TAF6	139
C9JG87	MRPL39	233
C9JJ35	HGF	6
C9JVK8	AZI2	109
C9JVK8	AZI2	112
C9JVK8	AZI2	115
D6RCM9	RANBP3L	50
H0YGP9	RSRC2	13
E9PSI1	CHMP4A	124
F1T0D7	LHX3	6
F5H0N7	CLIP1	406
F5H0N7	CLIP1	409
G3XAC1	SLC26A6	522
H7C5L9	MRPS22	46
H0Y9S3	CCDC110	3
H0YJT2	STRN3	123
H0YK44	CPNE6	98
H0YK44	CPNE6	99
H3BNV2	NQO1	2
I3L3J4	GABARAP	6
H7C1M1	PPP2R3A	45
J3KMX1	NUP88	647
J3KNF5	CEP290	484
J3KNQ1	ZFP1	274
J3KPM9	STAT1	368
K7EKI6	INO80C	8
O00217	NDUFS8	49
O14974	PPP1R12A	375
O14976	GAK	1227
O43149	ZZEF1	2525
O75330	HMMR	180
O75330	HMMR	187
P11388	TOP2A	1480
P20337	RAB3B	136
P21912	SDHB	268
P21912	SDHB	274
P35663	CYLC1	510
P35663	CYLC1	511
P49454	CENPF	486
P49643	PRIM2	459
P49643	PRIM2	462
P49643	PRIM2	463
P50749	RASSF2	277
Q5T179	CKS1B	4
Q5J1K9	ART3	78
Q3SXY8	ARL13B	290
Q53GL0	PLEKHO1	3
Q53GL0	PLEKHO1	4
Q5T036	FAM120AOS	3
Q5T036	FAM120AOS	5
Q5THJ4	VPS13D	914
Q6ZMN7	PDZRN4	720
Q7Z628	NET1	165
Q7Z7A1	CNTRL	2161
Q86XP3	DDX42	132
Q86Y26	NUTM1	252
Q86YR7	MCF2L2	704
Q8N3X1	FNBP4	927
Q8NAC3	IL17RC	105
Q8NAC3	IL17RC	106
Q8NFT2	STEAP2	463
Q8NH01	OR2T11	85
Q8NHU6	TDRD7	961
Q92665	MRPS31	82
Q92736	RYR2	335
Q92736	RYR2	103
Q96L96	ALPK3	861
Q96T23	RSF1	707
Q99440	LINC01587	5
Q9NQ75	CASS4	441
Q9NZ63	C9orf78	89
Q9ULE0	WWC3	130
Q9Y5G3	PCDHGB1	318
Q9Y6X0	SETBP1	469
Q9Y6Z7	COLEC10	97
R4GNC2	SFXN2	9
E7ENN3	SYNE1	7966
A0A140TA25	MYO1H	603
A0A1B0GUI1	RALGAPA1	75
A2AJT9	CXorf23	115
F5GYN0	FAM186A	717
C9JPC9	USP42	785
C9JPG5	SEMA3F	399
D6RCM9	RANBP3L	44
E7EX73	EIF4G1	169
E9PGC8	MAP1A	777
G3V1B3	RPL21	7
H3BPL4	KNOP1	153
J3KNF5	CEP290	8
O43615	TIMM44	340
O60506	SYNCRIP	394
O95239	KIF4A	655
Q0VD83	APOBR	246
Q5FBX5	IL7	76
Q5T0J7	Tex35	83
Q6PKC3	TXNDC11	903
Q7Z7A1	CNTRL	2165
Q8IWJ2	GCC2	730
Q8N5H7	SH2D3C	727
Q8NHU6	TDRD7	968
Q8NHY2	RFWD2	294
Q92547	TOPBP1	834
Q9HCS4	TCF7L1	218
Q9NVP1	DDX18	153
Q9Y6Z7	COLEC10	100

## Sheet: Li, 2021-Proteins
Gene	Kinase	TF
AKAP13	no	no
KIAA0586	no	no
METTL7B	no	no
PRMT1	no	no
ARHGAP5	no	no
STXBP1	no	no
RAB37	no	no
CAGE1	no	no
HK2	no	no
CENPJ	no	no
HYDIN	no	no
SCNN1B	no	no
TTC23	no	no
GPC1	no	no
TP53BP2	no	no
RANGAP1	no	no
UTRN	no	no
BLK	yes	no
PDIA6	no	no
GORAB	no	no
TEX11	no	no
SPATA5	no	no
CCDC150	no	no
OSMR	no	no
NRDE2	no	no
COG6	no	no
DAAM1	no	no
PRPF38B	no	no
TANC1	no	no
DNAJC24;ZCSL3	no	no
TTN	yes	no
RPSA	no	no
PFKL	no	no
DHX30	no	no
ENPP7	no	no
ADGRE1;EMR1	no	no
BRINP1	no	no
TIPRL	no	no
TCEA1	no	no
SUMO2	no	no
ALKBH1	no	no
NYAP1	no	no
ZER1	no	no
SEMA6D	no	no
MEF2BNB	no	no
PRR12	no	no
POLA1	no	no
LAMA2	no	no
EXPH5	no	no
ZNF804A	no	no
RBM26	no	no
SCN5A	no	no
SDCCAG8	no	no
TIGAR	no	no
SPEF2	no	no
DPYSL2	no	no
MACROD2	no	no
CUL4B	no	no
CXorf65	no	no
RC3H2	no	no
ARHGAP42	no	no
BNC2	no	no
TAF6	no	no
MRPL39	no	no
HGF	no	no
AZI2	no	no
RANBP3L	no	no
RSRC2	no	no
CHMP4A	no	no
LHX3	no	yes
CLIP1	no	no
SLC26A6	no	no
MRPS22	no	no
CCDC110	no	no
STRN3	no	no
CPNE6	no	no
NQO1	no	no
GABARAP	no	no
PPP2R3A	no	no
NUP88	no	no
CEP290	no	no
ZFP1	no	no
STAT1	no	yes
INO80C	no	no
NDUFS8	no	no
PPP1R12A	no	no
GAK	yes	no
ZZEF1	no	no
HMMR	no	no
TOP2A	no	no
RAB3B	no	no
SDHB	no	no
CYLC1	no	no
CENPF	no	no
PRIM2	no	no
RASSF2	no	no
CKS1B	no	no
ART3	no	no
ARL13B	no	no
PLEKHO1	no	no
FAM120AOS	no	no
VPS13D	no	no
PDZRN4	no	no
NET1	no	no
CNTRL	no	no
DDX42	no	no
NUTM1	no	no
MCF2L2	no	no
FNBP4	no	no
IL17RC	no	no
STEAP2	no	no
OR2T11	no	no
TDRD7	no	no
MRPS31	no	no
RYR2	no	no
ALPK3	no	no
RSF1	no	no
LINC01587	no	no
CASS4	no	no
C9orf78	no	no
WWC3	no	no
PCDHGB1	no	no
SETBP1	no	yes
COLEC10	no	no
SFXN2	no	no
NBPF26	no	no
ZNF708	no	no
SYNE1	no	no
MYO1H	no	no
RALGAPA1	no	no
CXorf23	no	no
FAM186A	no	no
MED29;IXL	no	no
USP42	no	no
SEMA3F	no	no
EIF4G1	no	no
MAP1A	no	no
RPL21	no	no
KNOP1	no	no
CEP290;BANP	no	no
TIMM44	no	no
SYNCRIP	no	no
KIF4A;KIF4B	no	no
APOBR	no	no
IL7	no	no
Tex35	no	no
TXNDC11	no	no
GCC2	no	no
SH2D3C	no	no
RFWD2	no	yes
TOPBP1	no	no
TCF7L1	no	no
DDX18	no	no

## Sheet: Cellular Component_Li
Gene	Uniprot	Gene Ontology (cellular component)
RPSA	A0A8I5KQE6	cytosolic small ribosomal subunit [GO:0022627]; nucleus [GO:0005634]; plasma membrane [GO:0005886]	in the cytoplasm and in the nucleus. Co-localizes with PPP1R16B in the cell membrane. {ECO:0000255|HAMAP-Rule:MF_03016}.
MACROD2	A1Z1Q3	nucleolus [GO:0005730]; nucleoplasm [GO:0005654]; nucleus [GO:0005634]
CXorf23	A2AJT9	mediator complex [GO:0016592]; mitochondrion [GO:0005739]
FAM186A	A6NE01
CXorf65	A6NEN9
ARHGAP42	A6NI28	cytoplasm [GO:0005737]
NBPF26	B4DH59	cytoplasm [GO:0005737]
NDUFS8	O00217	mitochondrial matrix [GO:0005759]; mitochondrial respiratory chain complex I [GO:0005747]; mitochondrion [GO:0005739]
PPP1R12A	O14974	A band [GO:0031672]; actin cytoskeleton [GO:0015629]; centrosome [GO:0005813]; contractile fiber [GO:0043292]; cytoplasm [GO:0005737]; cytosol [GO:0005829]; focal adhesion [GO:0005925]; kinetochore [GO:0000776]; nucleolus [GO:0005730]; nucleoplasm [GO:0005654]; plasma membrane [GO:0005886]; PTW/PP1 phosphatase complex [GO:0072357]; Z disc [GO:0030018]	cytoskeleton	stress fiber {ECO:0000269|PubMed:12923170}. Note=Also along actomyosin filaments. {ECO:0000269|PubMed:12923170}.
GAK	O14976	cytoplasm [GO:0005737]; cytosol [GO:0005829]; focal adhesion [GO:0005925]; Golgi apparatus [GO:0005794]; intracellular membrane-bounded organelle [GO:0043231]; membrane [GO:0016020]; perinuclear region of cytoplasm [GO:0048471]; presynapse [GO:0098793]; vesicle [GO:0031982]	trans-Golgi network {ECO:0000269|PubMed:10625686}. Cell junction	focal adhesion {ECO:0000305|PubMed:10625686}. Note=Localizes to the perinuclear area and to the trans-Golgi network. Also seen on the plasma membrane	probably at focal adhesions.
CEP290	O15078	centriolar satellite [GO:0034451]; centriole [GO:0005814]; centrosome [GO:0005813]; ciliary basal body [GO:0036064]; ciliary transition zone [GO:0035869]; cytoplasm [GO:0005737]; cytosol [GO:0005829]; extracellular region [GO:0005576]; membrane [GO:0016020]; MKS complex [GO:0036038]; nucleus [GO:0005634]; photoreceptor connecting cilium [GO:0032391]; protein-containing complex [GO:0032991]; speci…	microtubule organizing center	centrosome {ECO:0000269|PubMed:14654843	ECO:0000269|PubMed:16682973	ECO:0000269|PubMed:21493627	ECO:0000269|PubMed:21565611	ECO:0000269|PubMed:22797915}. Cytoplasm	cytoskeleton	microtubule organizing center	centrosome	centriolar satellite {ECO:0000269|PubMed:17705300	ECO:0000269|PubMed:21493627	ECO:0000269|PubMed:22797915	ECO:0000269|PubMed:23943788	ECO:0000269|PubMed:24121310}. Nucleus {ECO:0000250|UniProtKB:Q6A078}. Cell projection	cilium {ECO:0000269|PubMed:23943788}. Cytoplasm	cytoskeleton	cilium basal body {ECO:0000250|UniProtKB:Q6A078}. Cytoplasm	cytoskeleton	microtubule organizing center	centrosome	centriole {ECO:0000269|PubMed:22797915}. Cytoplasmic vesicle {ECO:0000303|PubMed:24051377}. Note=Displaced from centriolar satellites in response to cellular stress	such as ultraviolet light (UV) radiation or heat shock (PubMed:24121310). Found in the connecting cilium of photoreceptor cells	base of cilium in kidney intramedullary collecting duct cells (By similarity). Localizes at the transition zone	a region between the basal body and the ciliary axoneme (PubMed:23943788). Localization at the ciliary transition zone as well as at centriolar satellites is BBsome-dependent (PubMed:23943788). {ECO:0000250|UniProtKB:Q6A078	ECO:0000269|PubMed:23943788	ECO:0000269|PubMed:24121310}.
ZZEF1	O43149
TIMM44	O43615	fibrillar center [GO:0001650]; mitochondrial inner membrane [GO:0005743]; mitochondrial matrix [GO:0005759]; mitochondrion [GO:0005739]; TIM23 mitochondrial import inner membrane translocase complex [GO:0005744]
BRINP1	O60477	cytoplasm [GO:0005737]
SYNCRIP	O60506	catalytic step 2 spliceosome [GO:0071013]; CRD-mediated mRNA stability complex [GO:0070937]; cytosol [GO:0005829]; endoplasmic reticulum [GO:0005783]; GAIT complex [GO:0097452]; histone pre-mRNA 3'end processing complex [GO:0071204]; mCRD-mediated mRNA stability complex [GO:0106002]; membrane [GO:0016020]; mRNA editing complex [GO:0045293]; nucleoplasm [GO:0005654]; nucleus [GO:0005634]; ribonucl…	ECO:0000269|PubMed:19029303	ECO:0000269|PubMed:35538151}. Microsome {ECO:0000250|UniProtKB:Q7TMK9}. Endoplasmic reticulum {ECO:0000250}. Nucleus {ECO:0000250|UniProtKB:Q7TMK9}. Note=The tyrosine phosphorylated form bound to RNA is found in microsomes (By similarity). Localized in cytoplasmic mRNP granules containing untranslated mRNAs (By similarity). {ECO:0000250|UniProtKB:O43390	ECO:0000250|UniProtKB:Q7TMK9}.; SUBCELLULAR LOCATION: [Isoform 1]: Nucleus	nucleoplasm {ECO:0000250|UniProtKB:Q7TMK9}. Note=Expressed predominantly in the nucleoplasm. {ECO:0000250|UniProtKB:Q7TMK9}.; SUBCELLULAR LOCATION: [Isoform 2]: Nucleus	nucleoplasm {ECO:0000250|UniProtKB:Q7TMK9}. Note=Expressed predominantly in the nucleoplasm. {ECO:0000250|UniProtKB:Q7TMK9}.; SUBCELLULAR LOCATION: [Isoform 3]: Nucleus	nucleoplasm {ECO:0000250|UniProtKB:Q7TMK9}. Note=Expressed predominantly in the nucleoplasm. {ECO:0000250|UniProtKB:Q7TMK9}.
HMMR	O75330	cell surface [GO:0009986]; centrosome [GO:0005813]; cytosol [GO:0005829]; membrane [GO:0016020]; microtubule cytoskeleton [GO:0015630]; plasma membrane [GO:0005886]; spindle [GO:0005819]	spindle {ECO:0000250|UniProtKB:Q00547}.
TIPRL	O75663	cytosol [GO:0005829]
GABARAP	O95166	actin cytoskeleton [GO:0015629]; autophagosome [GO:0005776]; autophagosome membrane [GO:0000421]; axoneme [GO:0005930]; cell body [GO:0044297]; cytoplasmic vesicle [GO:0031410]; cytosol [GO:0005829]; Golgi membrane [GO:0000139]; lysosome [GO:0005764]; microtubule [GO:0005874]; microtubule associated complex [GO:0005875]; perinuclear region of cytoplasm [GO:0048471]; plasma membrane [GO:0005886]; …	ECO:0000269|PubMed:15169837	ECO:0000269|PubMed:17580304	ECO:0000269|PubMed:19056683}. Endomembrane system {ECO:0000250|UniProtKB:P60517}. Cytoplasm	cytoskeleton {ECO:0000250|UniProtKB:P60517}. Golgi apparatus membrane {ECO:0000250|UniProtKB:P60517}. Cytoplasmic vesicle {ECO:0000250|UniProtKB:P60517}. Note=Largely associated with intracellular membrane structures including the Golgi apparatus and postsynaptic cisternae. Colocalizes with microtubules (By similarity). Localizes also to discrete punctae along the ciliary axoneme (By similarity).…	ECO:0000250|UniProtKB:Q9DCD6}.
KIF4A	O95239	axon cytoplasm [GO:1904115]; chromosome [GO:0005694]; cytoplasm [GO:0005737]; cytosol [GO:0005829]; membrane [GO:0016020]; microtubule associated complex [GO:0005875]; midbody [GO:0030496]; nuclear matrix [GO:0016363]; nucleoplasm [GO:0005654]; spindle microtubule [GO:0005876]	spindle {ECO:0000269|PubMed:15297875	ECO:0000269|PubMed:29848660}. Midbody {ECO:0000269|PubMed:15297875	ECO:0000269|PubMed:29848660}. Chromosome {ECO:0000269|PubMed:11736643	ECO:0000269|PubMed:15297875	ECO:0000269|PubMed:29848660}. Note=Associates with chromosomes at all stage of mitosis (PubMed:11736643	PubMed:15297875	PubMed:15625105). Chromatin localization is dependent on iron-sulfur cluster binding (PubMed:29848660). In anaphase	associates with the mitotic spindle midzone (PubMed:15297875). In telophase and cytokinesis	co-localizes with CIAO2B at the spindle midzone and midbody (PubMed:29848660	PubMed:15297875). Co-localizes with PRC1 in early mitosis and at the spindle midzone from anaphase B to telophase (PubMed:15297875	PubMed:15625105). Does not localize to the nucleolus (PubMed:11736643). {ECO:0000269|PubMed:11736643	ECO:0000269|PubMed:15297875	ECO:0000269|PubMed:15625105	ECO:0000269|PubMed:29848660}.
CPNE6	O95741	axon [GO:0030424]; clathrin-coated endocytic vesicle [GO:0045334]; dendrite [GO:0030425]; endosome [GO:0005768]; extracellular exosome [GO:0070062]; membrane [GO:0016020]; perikaryon [GO:0043204]; plasma membrane [GO:0005886]	dendrite {ECO:0000250|UniProtKB:Q9Z140}. Note=Mainly cytoplasmic in absence of calcium. Associated predominantly with membranes in presence of calcium. Translocates to the cell membrane in a calcium-dependent manner. Colocalized with transferrin in intracellular clathrin-coated membrane vesicles in a calcium-dependent manner. {ECO:0000250|UniProtKB:Q9Z140}.
RPSA	P08865	cytoplasm [GO:0005737]; cytosol [GO:0005829]; cytosolic ribosome [GO:0022626]; cytosolic small ribosomal subunit [GO:0022627]; extracellular exosome [GO:0070062]; membrane [GO:0016020]; nucleoplasm [GO:0005654]; nucleus [GO:0005634]; plasma membrane [GO:0005886]	in the cytoplasm and in the nucleus (By similarity). Colocalizes with PPP1R16B in the cell membrane. {ECO:0000255|HAMAP-Rule:MF_03016}.
POLA1	P09884	alpha DNA polymerase:primase complex [GO:0005658]; cytosol [GO:0005829]; nuclear envelope [GO:0005635]; nuclear matrix [GO:0016363]; nucleolus [GO:0005730]; nucleoplasm [GO:0005654]; nucleus [GO:0005634]	colocalizes with RNA:DNA hybrids with a speckled pattern. {ECO:0000269|PubMed:27019227}.
TOP2A	P11388	chromosome, centromeric region [GO:0000775]; condensed chromosome [GO:0000793]; cytoplasm [GO:0005737]; DNA topoisomerase type II (double strand cut, ATP-hydrolyzing) complex [GO:0009330]; male germ cell nucleus [GO:0001673]; nucleolus [GO:0005730]; nucleoplasm [GO:0005654]; nucleus [GO:0005634]; protein-containing complex [GO:0032991]; ribonucleoprotein complex [GO:1990904]	ECO:0000269|PubMed:22013166	ECO:0000269|PubMed:8299728	ECO:0000269|PubMed:9155056}. Nucleus	nucleolus {ECO:0000269|PubMed:9155056}.
IL7	P13232	collagen-containing extracellular matrix [GO:0062023]; extracellular region [GO:0005576]; extracellular space [GO:0005615]
HGF	P14210	extracellular region [GO:0005576]; extracellular space [GO:0005615]; membrane [GO:0016020]; platelet alpha granule lumen [GO:0031093]
NQO1	P15559	cytoplasm [GO:0005737]; cytosol [GO:0005829]; dendrite [GO:0030425]; neuronal cell body [GO:0043025]; nucleus [GO:0005634]; synapse [GO:0045202]
ZNF708	P17019	nucleus [GO:0005634]
PFKL	P17858	6-phosphofructokinase complex [GO:0005945]; cytosol [GO:0005829]; extracellular exosome [GO:0070062]; extracellular region [GO:0005576]; ficolin-1-rich granule lumen [GO:1904813]; membrane [GO:0016020]; secretory granule lumen [GO:0034774]
RAB3B	P20337	cytoplasm [GO:0005737]; cytosol [GO:0005829]; dopaminergic synapse [GO:0098691]; endosome [GO:0005768]; extracellular exosome [GO:0070062]; Golgi apparatus [GO:0005794]; perinuclear region of cytoplasm [GO:0048471]; plasma membrane [GO:0005886]; synaptic vesicle [GO:0008021]; synaptic vesicle membrane [GO:0030672]; vesicle [GO:0031982]
SDHB	P21912	mitochondrial inner membrane [GO:0005743]; mitochondrial membrane [GO:0031966]; mitochondrial respiratory chain complex II, succinate dehydrogenase complex (ubiquinone) [GO:0005749]; mitochondrion [GO:0005739]; nucleoplasm [GO:0005654]; plasma membrane [GO:0005886]
TCEA1	P23193	nucleolus [GO:0005730]; nucleoplasm [GO:0005654]; nucleus [GO:0005634]; transcription factor TFIID complex [GO:0005669]
NET1	P23975	cell surface [GO:0009986]; membrane [GO:0016020]; membrane raft [GO:0045121]; neuron projection [GO:0043005]; neuronal cell body membrane [GO:0032809]; plasma membrane [GO:0005886]; presynaptic membrane [GO:0042734]
LAMA2	P24043	basement membrane [GO:0005604]; collagen-containing extracellular matrix [GO:0062023]; extracellular region [GO:0005576]; neuromuscular junction [GO:0031594]; protein complex involved in cell-matrix adhesion [GO:0098637]; sarcolemma [GO:0042383]; synaptic cleft [GO:0043083]	extracellular matrix	basement membrane. Note=Major component.
CLIP1	P30622	cell cortex [GO:0005938]; centrosome [GO:0005813]; cytoplasmic vesicle membrane [GO:0030659]; cytosol [GO:0005829]; intermediate filament [GO:0005882]; kinetochore [GO:0000776]; microtubule [GO:0005874]; microtubule cytoskeleton [GO:0015630]; nucleus [GO:0005634]; ruffle [GO:0001726]	ECO:0000269|PubMed:21646404}. Cytoplasmic vesicle membrane {ECO:0000269|PubMed:12433698}; Peripheral membrane protein; Cytoplasmic side. Cell projection	ruffle {ECO:0000269|PubMed:12433698}. Note=Localizes to microtubule plus ends (PubMed:21646404	PubMed:17889670). Localizes preferentially to the ends of tyrosinated microtubules (By similarity). Accumulates in plasma membrane regions with ruffling and protrusions. Associates with the membranes of intermediate macropinocytic vesicles (PubMed:12433698). {ECO:0000250|UniProtKB:Q922J3	ECO:0000269|PubMed:12433698	ECO:0000269|PubMed:17889670	ECO:0000269|PubMed:21646404}.
GPC1	P35052	cell surface [GO:0009986]; collagen-containing extracellular matrix [GO:0062023]; cytosol [GO:0005829]; endosome [GO:0005768]; extracellular exosome [GO:0070062]; extracellular matrix [GO:0031012]; extracellular region [GO:0005576]; extracellular space [GO:0005615]; Golgi lumen [GO:0005796]; lysosomal lumen [GO:0043202]; membrane raft [GO:0045121]; nucleoplasm [GO:0005654]; plasma membrane [GO:00…	extracellular space.
CYLC1	P35663	acrosomal matrix [GO:0043159]; cytoskeletal calyx [GO:0033150]; nucleus [GO:0005634]	perinuclear theca	calyx. Note=Sperm head cytoskeletal structure.
STAT1	P42224	axon [GO:0030424]; chromatin [GO:0000785]; cytoplasm [GO:0005737]; cytosol [GO:0005829]; dendrite [GO:0030425]; ISGF3 complex [GO:0070721]; nucleolus [GO:0005730]; nucleoplasm [GO:0005654]; nucleus [GO:0005634]; perinuclear region of cytoplasm [GO:0048471]; protein-containing complex [GO:0032991]; RNA polymerase II transcription regulator complex [GO:0090575]	ECO:0000269|PubMed:27796300	ECO:0000269|PubMed:28753426}. Nucleus {ECO:0000269|PubMed:15322115	ECO:0000269|PubMed:26479788	ECO:0000269|PubMed:28753426}. Note=Translocated into the nucleus upon tyrosine phosphorylation and dimerization	in response to IFN-gamma and signaling by activated FGFR1	FGFR2	FGFR3 or FGFR4 (PubMed:15322115). Monomethylation at Lys-525 is required for phosphorylation at Tyr-701 and translocation into the nucleus (PubMed:28753426). Translocates into the nucleus in response to interferon-beta stimulation (PubMed:26479788). {ECO:0000269|PubMed:15322115	ECO:0000269|PubMed:26479788	ECO:0000269|PubMed:28753426}.
RANGAP1	P46060	aggresome [GO:0016235]; axon cytoplasm [GO:1904115]; cytoplasm [GO:0005737]; cytoplasmic periphery of the nuclear pore complex [GO:1990723]; cytosol [GO:0005829]; dendrite [GO:0030425]; intracellular membrane-bounded organelle [GO:0043231]; kinetochore [GO:0000776]; mitotic spindle [GO:0072686]; nuclear envelope [GO:0005635]; nuclear membrane [GO:0031965]; nuclear pore [GO:0005643]; nuclear pore …	nucleoplasm {ECO:0000269|PubMed:8146159}. Nucleus envelope {ECO:0000269|PubMed:11854305	ECO:0000269|PubMed:15037602}. Chromosome	centromere	kinetochore {ECO:0000269|PubMed:11854305}. Cytoplasm	cytoskeleton	spindle {ECO:0000269|PubMed:11854305	ECO:0000269|PubMed:15037602}. Note=Cytoplasmic during interphase. Detected at the nuclear envelope during interphase (PubMed:11854305	PubMed:15037602). Targeted to the nuclear pores after sumoylation (PubMed:11854305). During mitosis	associates with mitotic spindles	but is essentially not detected at the spindle poles (PubMed:11854305	PubMed:15037602). Association with kinetochores appears soon after nuclear envelope breakdown and persists until late anaphase (PubMed:11854305). Mitotic location also requires sumoylation (PubMed:11854305). {ECO:0000269|PubMed:11854305	ECO:0000269|PubMed:15037602}.
RPL21	P46778	cytoplasm [GO:0005737]; cytosol [GO:0005829]; cytosolic large ribosomal subunit [GO:0022625]; cytosolic ribosome [GO:0022626]; endoplasmic reticulum [GO:0005783]; membrane [GO:0016020]	ECO:0000305|PubMed:25901680}. Endoplasmic reticulum {ECO:0000250|UniProtKB:P49666}. Note=Detected on cytosolic polysomes (PubMed:25957688). Detected in ribosomes that are associated with the rough endoplasmic reticulum (By similarity). {ECO:0000250|UniProtKB:P49666	ECO:0000269|PubMed:25957688}.
UTRN	P46939	cytoplasm [GO:0005737]; cytoskeleton [GO:0005856]; dystrophin-associated glycoprotein complex [GO:0016010]; extracellular exosome [GO:0070062]; filopodium [GO:0030175]; filopodium membrane [GO:0031527]; membrane [GO:0016020]; neuromuscular junction [GO:0031594]; nucleoplasm [GO:0005654]; plasma membrane [GO:0005886]; postsynaptic membrane [GO:0045211]; protein-containing complex [GO:0032991]; sar…
CENPF	P49454	axoneme [GO:0005930]; centrosome [GO:0005813]; chromosome, centromeric region [GO:0000775]; ciliary basal body [GO:0036064]; ciliary transition fiber [GO:0097539]; cytoplasm [GO:0005737]; cytosol [GO:0005829]; kinetochore [GO:0000776]; midbody [GO:0030496]; nuclear envelope [GO:0005635]; nuclear matrix [GO:0016363]; nuclear membrane [GO:0031965]; nucleoplasm [GO:0005654]; nucleus [GO:0005634]; ou…	centromere	kinetochore. Cytoplasm	cytoskeleton	spindle. Note=Relocalizes to the kinetochore/centromere (coronal surface of the outer plate) and the spindle during mitosis. Observed in nucleus during interphase but not in the nucleolus. At metaphase becomes localized to areas including kinetochore and mitotic apparatus as well as cytoplasm. By telophase	is concentrated within the intracellular bridge at either side of the mid-body.
PRIM2	P49643	alpha DNA polymerase:primase complex [GO:0005658]; nucleoplasm [GO:0005654]
TAF6	P49848	cytosol [GO:0005829]; MLL1 complex [GO:0071339]; nucleoplasm [GO:0005654]; nucleus [GO:0005634]; protein-containing complex [GO:0032991]; SAGA complex [GO:0000124]; SLIK (SAGA-like) complex [GO:0046695]; transcription factor TFIID complex [GO:0005669]; transcription factor TFTC complex [GO:0033276]
RASSF2	P50749	cytoplasm [GO:0005737]; cytosol [GO:0005829]; Golgi apparatus [GO:0005794]; kinetochore [GO:0000776]; nucleoplasm [GO:0005654]; nucleus [GO:0005634]; plasma membrane [GO:0005886]; protein-containing complex [GO:0032991]	kinetochore {ECO:0000269|PubMed:20813266}. Note=Translocates to the cytoplasm in the presence of STK3/MST2 and STK4/MST1.
SCNN1B	P51168	apical plasma membrane [GO:0016324]; cytoplasmic vesicle membrane [GO:0030659]; external side of plasma membrane [GO:0009897]; extracellular exosome [GO:0070062]; plasma membrane [GO:0005886]; sodium channel complex [GO:0034706]
BLK	P51451	cytosol [GO:0005829]; extrinsic component of cytoplasmic side of plasma membrane [GO:0031234]
HK2	P52789	centrosome [GO:0005813]; cytosol [GO:0005829]; intracellular membrane-bounded organelle [GO:0043231]; membrane [GO:0016020]; mitochondrial outer membrane [GO:0005741]; mitochondrion [GO:0005739]; plasma membrane [GO:0005886]; sarcoplasmic reticulum [GO:0016529]	ECO:0000269|PubMed:29298880}.
CKS1B	P61024	cyclin-dependent protein kinase holoenzyme complex [GO:0000307]; nucleoplasm [GO:0005654]; SCF ubiquitin ligase complex [GO:0019005]
STXBP1	P61764	axon [GO:0030424]; cytoplasm [GO:0005737]; cytoskeleton [GO:0005856]; cytosol [GO:0005829]; extracellular exosome [GO:0070062]; extrinsic component of presynaptic membrane [GO:0098888]; glutamatergic synapse [GO:0098978]; mitochondrion [GO:0005739]; nucleoplasm [GO:0005654]; parallel fiber to Purkinje cell synapse [GO:0098688]; perinuclear region of cytoplasm [GO:0048471]; phagocytic vesicle [GO:…
SUMO2	P61956	nucleoplasm [GO:0005654]; nucleus [GO:0005634]; PML body [GO:0016605]
MAP1A	P78559	axon [GO:0030424]; axon cytoplasm [GO:1904115]; axon initial segment [GO:0043194]; cytoplasm [GO:0005737]; cytosol [GO:0005829]; dendrite [GO:0030425]; dendritic branch [GO:0044307]; dendritic microtubule [GO:1901588]; dendritic shaft [GO:0043198]; microtubule [GO:0005874]; microtubule associated complex [GO:0005875]; neuron projection [GO:0043005]; neuronal cell body [GO:0043025]; primary dendri…
MRPS22	P82650	mitochondrial inner membrane [GO:0005743]; mitochondrial ribosome [GO:0005761]; mitochondrial small ribosomal subunit [GO:0005763]; mitochondrion [GO:0005739]
EIF4G1	Q04637	cytoplasm [GO:0005737]; cytoplasmic stress granule [GO:0010494]; cytosol [GO:0005829]; eukaryotic translation initiation factor 4F complex [GO:0016281]; membrane [GO:0016020]; nucleus [GO:0005634]; polysome [GO:0005844]; postsynapse [GO:0098794]
PPP2R3A	Q06190	protein phosphatase type 2A complex [GO:0000159]
APOBR	Q0VD83	chylomicron [GO:0042627]; low-density lipoprotein particle [GO:0034362]; membrane [GO:0016020]; plasma membrane [GO:0005886]; very-low-density lipoprotein particle [GO:0034361]	ECO:0000269|PubMed:7619811}. Note=Binds monocyte-macrophage membrane. Thought to be anchored in the membrane through an interaction with an integral membrane protein.
AKAP13	Q12802	cell cortex [GO:0005938]; cytosol [GO:0005829]; membrane [GO:0016020]; nucleus [GO:0005634]; perinuclear region of cytoplasm [GO:0048471]	ECO:0000269|PubMed:9891067}. Cytoplasm {ECO:0000269|PubMed:9627117}. Cytoplasm	cell cortex {ECO:0000269|PubMed:11546812}. Nucleus {ECO:0000269|PubMed:9627117}. Membrane {ECO:0000269|PubMed:11696353	ECO:0000269|PubMed:9891067}; Peripheral membrane protein {ECO:0000269|PubMed:11696353	ECO:0000305|PubMed:9891067}. Note=Colocalizes with the actin cytoskeleton at the cell cortex. {ECO:0000269|PubMed:11546812}.
ARHGAP5	Q13017	cytoplasm [GO:0005737]; cytosol [GO:0005829]; endoplasmic reticulum [GO:0005783]; plasma membrane [GO:0005886]
STRN3	Q13033	cytoplasm [GO:0005737]; dendrite [GO:0030425]; FAR/SIN/STRIPAK complex [GO:0090443]; Golgi apparatus [GO:0005794]; neuronal cell body [GO:0043025]; nucleoplasm [GO:0005654]; nucleus [GO:0005634]; plasma membrane [GO:0005886]; protein-containing complex [GO:0032991]
SEMA3F	Q13275	extracellular space [GO:0005615]; glutamatergic synapse [GO:0098978]
ART3	Q13508	extracellular exosome [GO:0070062]; extracellular region [GO:0005576]; plasma membrane [GO:0005886]
CUL4B	Q13620	Cul4-RING E3 ubiquitin ligase complex [GO:0080008]; Cul4A-RING E3 ubiquitin ligase complex [GO:0031464]; Cul4B-RING E3 ubiquitin ligase complex [GO:0031465]; cytosol [GO:0005829]; extracellular exosome [GO:0070062]; nucleoplasm [GO:0005654]; nucleus [GO:0005634]	zygotes and the 2-cell stage	but distributed in the cytoplasm at the MII-stage oocytes. {ECO:0000250|UniProtKB:A2A432}.
TP53BP2	Q13625	cell junction [GO:0030054]; cytoplasm [GO:0005737]; cytosol [GO:0005829]; nucleoplasm [GO:0005654]; nucleus [GO:0005634]; perinuclear region of cytoplasm [GO:0048471]
ALKBH1	Q13686	cytoplasm [GO:0005737]; endoplasmic reticulum [GO:0005783]; euchromatin [GO:0000791]; mitochondrion [GO:0005739]; nucleoplasm [GO:0005654]; nucleus [GO:0005634]	ECO:0000269|PubMed:27497299}. Note=Mainly localizes in euchromatin	largely excluded from heterochromatin and nucleoli (By similarity). {ECO:0000250|UniProtKB:P0CB42}.
ADGRE1	Q14246	external side of plasma membrane [GO:0009897]; plasma membrane [GO:0005886]
SCN5A	Q14524	caveola [GO:0005901]; cell surface [GO:0009986]; endoplasmic reticulum [GO:0005783]; intercalated disc [GO:0014704]; lateral plasma membrane [GO:0016328]; membrane [GO:0016020]; nucleolus [GO:0005730]; nucleoplasm [GO:0005654]; perinuclear region of cytoplasm [GO:0048471]; plasma membrane [GO:0005886]; sarcolemma [GO:0042383]; T-tubule [GO:0030315]; voltage-gated calcium channel complex [GO:00058…	ECO:0000269|PubMed:21447824	ECO:0000269|PubMed:23085483	ECO:0000269|PubMed:23420830	ECO:0000269|PubMed:25370050	ECO:0000269|PubMed:26279430}; Multi-pass membrane protein {ECO:0000250|UniProtKB:D0E0C2}. Cytoplasm	perinuclear region {ECO:0000269|PubMed:21447824}. Cell membrane	sarcolemma	T-tubule {ECO:0000250|UniProtKB:P15389}. Cell junction {ECO:0000250|UniProtKB:P15389}. Note=RANGRF promotes trafficking to the cell membrane. Colocalizes with PKP2 at intercalated disks in the heart (By similarity). {ECO:0000250|UniProtKB:P15389	ECO:0000269|PubMed:21447824	ECO:0000269|PubMed:23420830}.
PDIA6	Q15084	cytosol [GO:0005829]; endoplasmic reticulum [GO:0005783]; endoplasmic reticulum chaperone complex [GO:0034663]; endoplasmic reticulum lumen [GO:0005788]; endoplasmic reticulum membrane [GO:0005789]; endoplasmic reticulum-Golgi intermediate compartment [GO:0005793]; extracellular exosome [GO:0070062]; extracellular space [GO:0005615]; melanosome [GO:0042470]; plasma membrane [GO:0005886]
DPYSL2	Q16555	cytoskeleton [GO:0005856]; cytosol [GO:0005829]; extracellular exosome [GO:0070062]; plasma membrane [GO:0005886]	cytoskeleton {ECO:0000269|PubMed:20801876}. Membrane {ECO:0000269|PubMed:20801876}. Note=Tightly but non-covalently associated with membranes.
KNOP1	Q1ED39	nucleolus [GO:0005730]
KIF4B	Q2VIQ3	cytosol [GO:0005829]; microtubule [GO:0005874]; microtubule associated complex [GO:0005875]; nuclear matrix [GO:0016363]; nucleoplasm [GO:0005654]
ARL13B	Q3SXY8	axoneme [GO:0005930]; ciliary membrane [GO:0060170]; cilium [GO:0005929]; cytosol [GO:0005829]; motile cilium [GO:0031514]; non-motile cilium [GO:0097730]	ECO:0000269|PubMed:24120134}; Lipid-anchor {ECO:0000269|PubMed:18554500	ECO:0000269|PubMed:24120134}. Cell projection	cilium {ECO:0000269|PubMed:25138100}. Note=Associates to the cilium membrane via palmitoylation. Localizes to proximal ciliary membranes	to an inversin-like subciliary membrane compartment	excluding the transition zone.
HYDIN	Q4G0P3	axonemal central apparatus [GO:1990716]; axonemal central pair projection [GO:1990718]; axoneme [GO:0005930]	cytoskeleton	cilium axoneme {ECO:0000250|UniProtKB:Q80W93}. Note=Localizes in the cilium axoneme in a SPEF1-dependent manner. {ECO:0000250|UniProtKB:Q80W93}.
PLEKHO1	Q53GL0	cytoplasm [GO:0005737]; muscle cell projection membrane [GO:0036195]; nucleus [GO:0005634]; ruffle membrane [GO:0032587]	ECO:0000269|PubMed:14729969	ECO:0000269|PubMed:15254037	ECO:0000269|PubMed:16325375}; Peripheral membrane protein {ECO:0000305|PubMed:14729969}. Nucleus {ECO:0000269|PubMed:10799509	ECO:0000269|PubMed:11827170	ECO:0000269|PubMed:15706351}. Cytoplasm {ECO:0000269|PubMed:15706351}. Note=Predominantly localized to the plasma membrane through the binding to phosphatidylinositol 3-phosphate (PubMed:14729969). In C2C12 cells	with the absence of growth factor	it is found in the nucleus (PubMed:14729969). It rapidly translocates to the plasma membrane after insulin stimulation (PubMed:14729969). In response to TNF	it translocates from the plasma membrane to the cytoplasm and then to the nucleus accompanied by cleavage by caspase-3 (PubMed:15706351). However	the subcellular location is highly dependent of the cell type	and this explains why it is found exclusively at the plasma membrane	in some type of cells (Probable). {ECO:0000269|PubMed:14729969	ECO:0000269|PubMed:15706351	ECO:0000305}.
FAM120AOS	Q5T036
Tex35	Q5T0J7	microtubule cytoskeleton [GO:0015630]; nucleus [GO:0005634]
GORAB	Q5T7V8	cytoplasm [GO:0005737]; cytosol [GO:0005829]; Golgi apparatus [GO:0005794]; nucleolus [GO:0005730]; nucleoplasm [GO:0005654]
RBM26	Q5T8P6	nucleus [GO:0005634]
VPS13D	Q5THJ4	extracellular exosome [GO:0070062]; extrinsic component of membrane [GO:0019898]
PRPF38B	Q5VTL8	precatalytic spliceosome [GO:0071011]
TTC23	Q5W5X9	cilium [GO:0005929]
RALGAPA1	Q6GYQ0	cytoplasm [GO:0005737]; nucleus [GO:0005634]
ZFP1	Q6P2D0	nucleus [GO:0005634]
DNAJC24	Q6P3W2	cytoplasm [GO:0005737]; cytoskeleton [GO:0005856]
INO80C	Q6PI98	Ino80 complex [GO:0031011]; MLL1 complex [GO:0071339]; nucleoplasm [GO:0005654]
TXNDC11	Q6PKC3	endoplasmic reticulum membrane [GO:0005789]
ENPP7	Q6UWV6	Golgi apparatus [GO:0005794]; membrane [GO:0016020]; microvillus [GO:0005902]; plasma membrane [GO:0005886]	ECO:0000269|PubMed:15205117}. Note=The catalytic domain is released into the extracellular medium when cells are treated with trypsin (PubMed:15205117). Localized at the surface of the microvillar membrane in small intestine enterocytes	and in endosome-like structures situated beneath the microvillar membrane	and in Golgi complex (PubMed:12671034	PubMed:12885774). {ECO:0000269|PubMed:12671034	ECO:0000269|PubMed:12885774	ECO:0000269|PubMed:15205117}.
METTL7B	Q6UX53	endoplasmic reticulum membrane [GO:0005789]; lipid droplet [GO:0005811]
PDZRN4	Q6ZMN7
BNC2	Q6ZN30	chromatin [GO:0000785]; nucleoplasm [GO:0005654]; nucleus [GO:0005634]
NYAP1	Q6ZVC0
DHX30	Q7L2E3	cytoplasm [GO:0005737]; cytosol [GO:0005829]; mitochondrial nucleoid [GO:0042645]; mitochondrion [GO:0005739]; nucleus [GO:0005634]; ribonucleoprotein granule [GO:0035770]	mitochondrion nucleoid {ECO:0000269|PubMed:16825194	ECO:0000269|PubMed:18063578	ECO:0000269|PubMed:25683715}. Note=Localizes to mitochondrial RNA granules found in close proximity to the mitochondrial nucleoids (PubMed:16825194	PubMed:25683715). Relocalizes to stress granules upon heat stress (PubMed:29100085). {ECO:0000269|PubMed:16825194	ECO:0000269|PubMed:25683715	ECO:0000269|PubMed:29100085}.
RSRC2	Q7L4I2
ZNF804A	Q7Z570	cytoplasm [GO:0005737]; dendritic microtubule [GO:1901588]; dendritic shaft [GO:0043198]; dendritic spine [GO:0043197]; growth cone [GO:0030426]; neuronal cell body [GO:0043025]; nucleus [GO:0005634]; plasma membrane [GO:0005886]; postsynapse [GO:0098794]; presynapse [GO:0098793]
NET1	Q7Z628	cytosol [GO:0005829]; nucleus [GO:0005634]
CNTRL	Q7Z7A1	centriolar satellite [GO:0034451]; centriolar subdistal appendage [GO:0120103]; centrosome [GO:0005813]; cytosol [GO:0005829]; Flemming body [GO:0090543]; meiotic spindle pole [GO:0090619]; membrane [GO:0016020]; microtubule organizing center [GO:0005815]; mitotic spindle pole [GO:0097431]; perinuclear region of cytoplasm [GO:0048471]	microtubule organizing center	centrosome {ECO:0000269|PubMed:10688839	ECO:0000269|PubMed:11956314	ECO:0000269|PubMed:12732615	ECO:0000269|PubMed:14654843}. Midbody	Midbody ring {ECO:0000269|PubMed:12732615	ECO:0000269|PubMed:16213214}.
ZER1	Q7Z7L7	Cul2-RING ubiquitin ligase complex [GO:0031462]
SDCCAG8	Q86SQ7	cell-cell junction [GO:0005911]; centriolar satellite [GO:0034451]; centriole [GO:0005814]; centrosome [GO:0005813]; ciliary basal body [GO:0036064]; cytosol [GO:0005829]; photoreceptor cell cilium [GO:0097733]	microtubule organizing center	centrosome	centriole. Cytoplasm	cytoskeleton	microtubule organizing center	centrosome {ECO:0000269|PubMed:27224062}. Cytoplasm	cytoskeleton	cilium basal body {ECO:0000269|PubMed:27224062}. Cell junction. Note=Located at the distal ends of both centrioles and colocalizes to centrosomes throughout the cell cycle.; SUBCELLULAR LOCATION: [Isoform 2]: Cytoplasm.
RANBP3L	Q86VV4	cytoplasm [GO:0005737]; nuclear pore [GO:0005643]
DDX42	Q86XP3	Cajal body [GO:0015030]; cytoplasm [GO:0005737]; cytosol [GO:0005829]; membrane [GO:0016020]; nuclear speck [GO:0016607]; nucleoplasm [GO:0005654]; nucleus [GO:0005634]	Cajal body {ECO:0000269|PubMed:12234937}. Nucleus speckle {ECO:0000269|PubMed:12234937}.
NUTM1	Q86Y26	cytoplasm [GO:0005737]; nucleus [GO:0005634]
MCF2L2	Q86YR7	cytoplasm [GO:0005737]
GCC2	Q8IWJ2	cytosol [GO:0005829]; Golgi apparatus [GO:0005794]; membrane [GO:0016020]; nucleoplasm [GO:0005654]; trans-Golgi network [GO:0005802]
TEX11	Q8IYF3	central element [GO:0000801]; chromosome [GO:0005694]
MYO1H	Q8N1T3	actin cytoskeleton [GO:0015629]; cytoplasm [GO:0005737]; myosin complex [GO:0016459]; vesicle [GO:0031982]
FNBP4	Q8N3X1	nucleoplasm [GO:0005654]
SH2D3C	Q8N5H7	axon [GO:0030424]; cytosol [GO:0005829]; ruffle membrane [GO:0032587]	axon {ECO:0000250|UniProtKB:Q9QZS8}. Cell projection	ruffle membrane {ECO:0000250|UniProtKB:Q9QZS8}. Note=Associated with the membrane when EGF-stimulated (By similarity). Expressed at the cortical actin ring in B cells (By similarity). {ECO:0000250|UniProtKB:Q9QZS8}.; SUBCELLULAR LOCATION: [Isoform 1]: Cell membrane {ECO:0000269|PubMed:17174122}; Peripheral membrane protein {ECO:0000269|PubMed:17174122}.
BANP	Q8N9N5	nuclear body [GO:0016604]; nucleoplasm [GO:0005654]
IL17RC	Q8NAC3	cell surface [GO:0009986]; plasma membrane [GO:0005886]
SPATA5	Q8NB90	cytoplasm [GO:0005737]; mitochondrion [GO:0005739]; spindle [GO:0005819]	spindle {ECO:0000269|PubMed:18445686}.
CCDC150	Q8NCX0
EXPH5	Q8NEV8	endosome [GO:0005768]
SYNE1	Q8NF91	cytoplasm [GO:0005737]; cytoskeleton [GO:0005856]; Golgi apparatus [GO:0005794]; meiotic nuclear membrane microtubule tethering complex [GO:0034993]; membrane [GO:0016020]; nuclear envelope [GO:0005635]; nuclear membrane [GO:0031965]; nuclear outer membrane [GO:0005640]; nucleolus [GO:0005730]; nucleoplasm [GO:0005654]; nucleus [GO:0005634]; P-body [GO:0000932]; postsynaptic membrane [GO:0045211]…	myofibril	sarcomere. Note=The largest part of the protein is cytoplasmic	while its C-terminal part is associated with the nuclear envelope	most probably the outer nuclear membrane. In skeletal and smooth muscles	a significant amount is found in the sarcomeres. In myoblasts	relocalized from the nuclear envelope to the nucleus and cytoplasm during cell differentiation.; SUBCELLULAR LOCATION: [Isoform GSRP-56]: Golgi apparatus {ECO:0000269|PubMed:16875688}.
STEAP2	Q8NFT2	cytosol [GO:0005829]; early endosome [GO:0005769]; endosome [GO:0005768]; endosome membrane [GO:0010008]; Golgi membrane [GO:0000139]; plasma membrane [GO:0005886]; trans-Golgi network transport vesicle [GO:0030140]
SEMA6D	Q8NFY4	cell surface [GO:0009986]; cytoplasm [GO:0005737]; Golgi apparatus [GO:0005794]; plasma membrane [GO:0005886]
OR2T11	Q8NH01	plasma membrane [GO:0005886]
TDRD7	Q8NHU6	chromatoid body [GO:0033391]; cytoplasm [GO:0005737]; ribonucleoprotein granule [GO:0035770]	also named processing bodies (P-bodies) in somatic cells. Detected in the multilobular cytoplasmic CBs (also called intermitochondrial cementin) in pachytene spermatocytes and as a single perinuclear CB in haploid round spermatids (By similarity). {ECO:0000250}.
RFWD2	Q8NHY2	Cul4A-RING E3 ubiquitin ligase complex [GO:0031464]; cytosol [GO:0005829]; Golgi membrane [GO:0000139]; nuclear speck [GO:0016607]; nucleoplasm [GO:0005654]
CCDC110	Q8TBZ0	cytoskeleton [GO:0005856]; cytosol [GO:0005829]; nucleoplasm [GO:0005654]
CAGE1	Q8TC20
TTN	Q8WZ42	condensed nuclear chromosome [GO:0000794]; cytosol [GO:0005829]; extracellular exosome [GO:0070062]; extracellular region [GO:0005576]; I band [GO:0031674]; M band [GO:0031430]; striated muscle thin filament [GO:0005865]; titin-telethonin complex [GO:1990733]; Z disc [GO:0030018]
TOPBP1	Q92547	actin cytoskeleton [GO:0015629]; BRCA1-B complex [GO:0070532]; chromosome [GO:0005694]; condensed nuclear chromosome [GO:0000794]; cytoplasm [GO:0005737]; male germ cell nucleus [GO:0001673]; microtubule organizing center [GO:0005815]; nuclear body [GO:0016604]; nucleoplasm [GO:0005654]; nucleus [GO:0005634]; plasma membrane [GO:0005886]; PML body [GO:0016605]; spindle pole [GO:0000922]	microtubule organizing center	centrosome. Cytoplasm	cytoskeleton	spindle pole. Chromosome. Note=Detected on unpaired autosomes in meiotic prophase cells. Detected on X and Y chromosomes during later stages of prophase. Colocalizes with ATR and H2AX at unsynapsed chromosome cores during prophase (By similarity). Has a uniform nuclear distribution during G phase. Colocalizes with BRCA1 at stalled replication forks during S phase. In mitotic cells it colocalizes …	UV or gamma irradiation. Localizes to sites of DNA damage in a H2AX- independent manner. {ECO:0000250}.
MRPS31	Q92665	mitochondrial inner membrane [GO:0005743]; mitochondrial small ribosomal subunit [GO:0005763]; mitochondrion [GO:0005739]; nucleolus [GO:0005730]
RYR2	Q92736	calcium channel complex [GO:0034704]; junctional sarcoplasmic reticulum membrane [GO:0014701]; membrane [GO:0016020]; plasma membrane [GO:0005886]; protein-containing complex [GO:0032991]; sarcolemma [GO:0042383]; sarcoplasmic reticulum [GO:0016529]; sarcoplasmic reticulum membrane [GO:0033017]; smooth endoplasmic reticulum [GO:0005790]; Z disc [GO:0030018]
RAB37	Q96AX2	azurophil granule membrane [GO:0035577]; endoplasmic reticulum-Golgi intermediate compartment [GO:0005793]; endosome [GO:0005768]; Golgi apparatus [GO:0005794]; plasma membrane [GO:0005886]; specific granule membrane [GO:0035579]
MEF2BNB	Q96FH0	BORC complex [GO:0099078]; cytoplasmic side of lysosomal membrane [GO:0098574]
ALPK3	Q96L96	nucleus [GO:0005634]
SFXN2	Q96NB2	mitochondrial inner membrane [GO:0005743]; mitochondrial outer membrane [GO:0005741]; mitochondrion [GO:0005739]
RSF1	Q96T23	nucleoplasm [GO:0005654]; nucleus [GO:0005634]; RSF complex [GO:0031213]	ECO:0000269|PubMed:12972596}. Note=Localization is diffuse during mitosis (PubMed:12972596). Co-localizes with SMARCA5 in the nucleus (PubMed:12972596). {ECO:0000269|PubMed:12972596}.
LINC01587	Q99440
NUP88	Q99567	cytosol [GO:0005829]; nuclear envelope [GO:0005635]; nuclear pore [GO:0005643]; nucleoplasm [GO:0005654]
OSMR	Q99650	apical plasma membrane [GO:0016324]; external side of plasma membrane [GO:0009897]; oncostatin-M receptor complex [GO:0005900]; plasma membrane [GO:0005886]; receptor complex [GO:0043235]
PRMT1	Q99873	cytoplasm [GO:0005737]; cytosol [GO:0005829]; methylosome [GO:0034709]; nucleoplasm [GO:0005654]; nucleus [GO:0005634]	ECO:0000269|PubMed:16879614}. Nucleus	nucleoplasm {ECO:0000250|UniProtKB:Q9JIF0}. Cytoplasm {ECO:0000269|PubMed:26876602}. Cytoplasm	cytosol {ECO:0000250|UniProtKB:Q9JIF0}. Note=Mostly found in the cytoplasm. Colocalizes with CHTOP within the nucleus. Low levels detected also in the chromatin fraction (By similarity). {ECO:0000250|UniProtKB:Q9JIF0}.
KIAA0586	Q9BVV6	centriole [GO:0005814]; centrosome [GO:0005813]; ciliary basal body [GO:0036064]; cytoplasm [GO:0005737]; photoreceptor inner segment [GO:0001917]	microtubule organizing center	centrosome {ECO:0000269|PubMed:19144723}. Photoreceptor inner segment {ECO:0000269|PubMed:26386247}. Cytoplasm	cytoskeleton	microtubule organizing center	centrosome	centriole {ECO:0000269|PubMed:24421332	ECO:0000269|PubMed:26386247}. Cytoplasm	cytoskeleton	cilium basal body {ECO:0000269|PubMed:26386247}. Note=Forms a ring-like structure at the extreme distal end of both mother and daughter centrioles (PubMed:24421332). In photoreceptor cells localized to the joint between the inner and outer segments	specifically localized at the mother centriole (basal body) and the adjacent centriole as well as between the two centrioles but not in the connecting cilium (PubMed:26386247). {ECO:0000269|PubMed:24421332	ECO:0000269|PubMed:26386247}.
SLC26A6	Q9BXS9	apical plasma membrane [GO:0016324]; basolateral plasma membrane [GO:0016323]; brush border membrane [GO:0031526]; chloride channel complex [GO:0034707]; cytoplasmic vesicle membrane [GO:0030659]; cytosol [GO:0005829]; endoplasmic reticulum [GO:0005783]; membrane [GO:0016020]; plasma membrane [GO:0005886]; sperm midpiece [GO:0097225]; vesicle [GO:0031982]; vesicle membrane [GO:0012506]	of enterocytes of the small intestine and of gastric parietal cells in the stomach. {ECO:0000250|UniProtKB:Q8CIW6}.; SUBCELLULAR LOCATION: [Isoform 4]: Cell membrane {ECO:0000269|PubMed:12444019	ECO:0000269|PubMed:15990874}; Multi-pass membrane protein {ECO:0000255}. Apical cell membrane {ECO:0000269|PubMed:11087667}; Multi-pass membrane protein {ECO:0000255}. Basolateral cell membrane {ECO:0000269|PubMed:11087667}; Multi-pass membrane protein {ECO:0000255}. Note=Localizes to the apical and basolateral surfaces of tubular wall cells in kidney and in the brush border of pancreatic duct ce…	ECO:0000269|PubMed:15990874}.; SUBCELLULAR LOCATION: [Isoform 5]: Cell membrane {ECO:0000269|PubMed:12444019}; Multi-pass membrane protein {ECO:0000255}.; SUBCELLULAR LOCATION: [Isoform 6]: Cell membrane {ECO:0000269|PubMed:12444019}; Multi-pass membrane protein {ECO:0000255}.
CHMP4A	Q9BY43	amphisome membrane [GO:1904930]; autophagosome membrane [GO:0000421]; cytoplasm [GO:0005737]; cytoplasmic side of plasma membrane [GO:0009898]; cytosol [GO:0005829]; ESCRT III complex [GO:0000815]; kinetochore [GO:0000776]; kinetochore microtubule [GO:0005828]; lysosomal membrane [GO:0005765]; membrane coat [GO:0030117]; midbody [GO:0030496]; multivesicular body [GO:0005771]; multivesicular body …
SPEF2	Q9C093	cytoplasm [GO:0005737]; extracellular region [GO:0005576]; Golgi apparatus [GO:0005794]; manchette [GO:0002177]; sperm flagellum [GO:0036126]; sperm midpiece [GO:0097225]	flagellum {ECO:0000269|PubMed:31048344	ECO:0000269|PubMed:31151990	ECO:0000269|PubMed:31278745}. Cytoplasm {ECO:0000250|UniProtKB:Q8C9J3}. Golgi apparatus {ECO:0000250|UniProtKB:Q8C9J3}. Note=Shows dynamic localization in developing spermatozoa. Localizes to the manchette in step 10-12 elongating spermatids. Detected in the basal body and neck area of step 13-14 spermatids. Localizes to the midpiece of the sperm tail in step 15-16 spermatids. During the epididym…	expression in the sperm tail reduces and becomes concentrated at the distal part of the midpiece. Detected in the Golgi apparatus of late spermatocytes and round spermatids. Detected in the cytoplasm of Sertoli cells. {ECO:0000250|UniProtKB:Q8C9J3}.
TANC1	Q9C0D5	axon terminus [GO:0043679]; dendrite [GO:0030425]; glutamatergic synapse [GO:0098978]; neuronal cell body [GO:0043025]; postsynaptic density [GO:0014069]
AZI2	Q9H6S1	cytoplasm [GO:0005737]; serine/threonine protein kinase complex [GO:1902554]
NRDE2	Q9H7Z3	nuclear speck [GO:0016607]; nucleolus [GO:0005730]; nucleoplasm [GO:0005654]; nucleus [GO:0005634]	nucleolus {ECO:0000269|PubMed:30842217}. Nucleus	nucleoplasm {ECO:0000269|PubMed:30538148	ECO:0000269|PubMed:30842217}. Nucleus {ECO:0000269|PubMed:29902117}.
USP42	Q9H9J4	cytosol [GO:0005829]; nucleoplasm [GO:0005654]; nucleus [GO:0005634]
RC3H2	Q9HBD1	cell surface [GO:0009986]; intracellular membrane-bounded organelle [GO:0043231]; membrane [GO:0016020]; P-body [GO:0000932]	such as that induced by arsenite	localizes to cytosolic stress granules. Localization to stress granules	but not to P-bodies	depends upon the RING-type zinc finger. {ECO:0000269|PubMed:20412057}.
CENPJ	Q9HC77	centriole [GO:0005814]; centrosome [GO:0005813]; ciliary basal body [GO:0036064]; cytoplasm [GO:0005737]; cytosol [GO:0005829]; gamma-tubulin small complex [GO:0008275]; microtubule [GO:0005874]; procentriole replication complex [GO:0120099]	microtubule organizing center	centrosome {ECO:0000269|PubMed:11003675	ECO:0000269|PubMed:14654843	ECO:0000269|PubMed:20531387}. Cytoplasm	cytoskeleton	microtubule organizing center	centrosome	centriole {ECO:0000269|PubMed:17681131	ECO:0000269|PubMed:20531387	ECO:0000269|PubMed:22020124}. Note=Localized within the center of microtubule asters (PubMed:11003675). During centriole biogenesis	it is concentrated within the proximal lumen of both parental centrioles and procentrioles (PubMed:17681131). {ECO:0000269|PubMed:11003675	ECO:0000269|PubMed:17681131}.
TCF7L1	Q9HCS4	beta-catenin-TCF complex [GO:1990907]; cytosol [GO:0005829]; nucleoplasm [GO:0005654]; nucleus [GO:0005634]
CASS4	Q9NQ75	cytoplasm [GO:0005737]; cytoskeleton [GO:0005856]; focal adhesion [GO:0005925]	focal adhesion {ECO:0000269|PubMed:18256281}.
TIGAR	Q9NQ88	cytoplasm [GO:0005737]; cytosol [GO:0005829]; mitochondrial outer membrane [GO:0005741]; nucleus [GO:0005634]	ECO:0000269|PubMed:23185017	ECO:0000269|PubMed:25928429}.
DDX18	Q9NVP1	chromosome [GO:0005694]; membrane [GO:0016020]; nucleolus [GO:0005730]
MED29	Q9NX70	core mediator complex [GO:0070847]; mediator complex [GO:0016592]; nucleoplasm [GO:0005654]; nucleus [GO:0005634]
MRPL39	Q9NYK5	mitochondrial inner membrane [GO:0005743]; mitochondrial large ribosomal subunit [GO:0005762]; mitochondrial ribosome [GO:0005761]; mitochondrion [GO:0005739]	ECO:0000269|PubMed:28892042}.
C9orf78	Q9NZ63	chromosome, centromeric region [GO:0000775]; cytosol [GO:0005829]; nucleoplasm [GO:0005654]; nucleus [GO:0005634]; spliceosomal complex [GO:0005681]
LHX3	Q9UBR4	chromatin [GO:0000785]; nucleus [GO:0005634]; transcription regulator complex [GO:0005667]
WWC3	Q9ULE0	cytoplasm [GO:0005737]; cytosol [GO:0005829]
PRR12	Q9ULL5	neuron projection [GO:0043005]; nucleus [GO:0005634]; postsynaptic density [GO:0014069]
COG6	Q9Y2V7	Golgi membrane [GO:0000139]; Golgi transport complex [GO:0017119]; trans-Golgi network membrane [GO:0032588]
NET1	Q9Y345	dense core granule [GO:0031045]; endosome [GO:0005768]; glycinergic synapse [GO:0098690]; membrane [GO:0016020]; plasma membrane [GO:0005886]; presynaptic membrane [GO:0042734]
DAAM1	Q9Y4D1	ciliary basal body [GO:0036064]; cytosol [GO:0005829]; membrane [GO:0016020]; motile cilium [GO:0031514]; plasma membrane [GO:0005886]; stress fiber [GO:0001725]	cilium basal body {ECO:0000269|PubMed:26644512}. Note=Perinuclear.
PCDHGB1	Q9Y5G3	growth cone [GO:0030426]; plasma membrane [GO:0005886]
SETBP1	Q9Y6X0	cytosol [GO:0005829]; nuclear body [GO:0016604]; nucleoplasm [GO:0005654]
COLEC10	Q9Y6Z7	collagen trimer [GO:0005581]; cytoplasm [GO:0005737]; external side of plasma membrane [GO:0009897]; extracellular region [GO:0005576]; extracellular space [GO:0005615]; Golgi apparatus [GO:0005794]; multivesicular body [GO:0005771]; rough endoplasmic reticulum [GO:0005791]; serine-type endopeptidase complex [GO:1905370]

## Sheet: Human-Sites
Protein	Position
A0A087WUA7	852
A0A087WUK2	216
A0A087WUK2	221
A0A087WUZ3	355
A0A0A0MR97	32
A0A0A0MRM2	1396
A0A2R8Y4T1	40
A0A2R8Y4T1	45
A0A5H1ZRP3	255
D6RBI3	390
B3KRD8	302
C9JME2	265
E7EVM0	114
E7EVM0	116
E9PH60	266
E9PH60	271
E9PJW6	126
E9PJX3	447
E9PJX3	448
F8VUJ3	410
H3BPR3	125
H3BPR3	128
K7EQS1	92
M0QXK2	80
Q5TBF5	188
Q5TBF5	195
P45985	118
P61225	31
Q03989	367
Q14012	49
Q14012	53
Q5RHP9	890
Q6ZXV5	578
Q8N9E0	171
Q8NH59	299
Q8WWL7	287
Q8WWL7	288
Q9NPG3	232
Q9NS56	821
Q9ULC6	520
Q9ULC6	524
Q9Y2I7	347
Q9Y2I7	356
A0A087WX71	417
A0A087WYW3	916
A0A087X138	113
A0A0J9YXB6	200
A0A140T941	92
H0Y8Y7	716
H0Y8Y7	720
B7Z6D5	655
D6RG09	201
H0YCZ2	464
H0YCZ2	469
G3V503	78
H7C2P2	1115
J3KQ66	2189
J3QT09	256
O00478	313
O75475	260
P04920	1080
P04920	1082
P33981	191
P48736	591
P49643	228
P55916	303
Q14692	243
Q6Y2L2	115
Q5TAP6	611
Q6NUP7	631
Q86TE4	155
Q86TE4	156
Q86TM3	451
Q86WR0	175
Q8IWY7	472
Q8NDV1	288
Q8WWK9	269
Q96IK0	238
Q96NN9	354
Q9UKD2	86
U3KPZ7	159
A0A1W2PQJ7	1104
Q2YDW8	235
O43825	149
P36542	36
Q5T5X7	821
Q5T5X7	822
Q5T7W0	945
Q5TAA8	308
Q8WXD9	422
Q96I25	367
Q9BVJ6	136
Q9BVJ6	612
Q9NQT5	124
A0A087WV90	1545
A0A087WV90	1554
A0A087WYY3	286
A0A0A0MTK4	491
A0A0A0MTS7	5799
A0A0C4DGB5	405
A0A0C4DGB5	407
A0A0D9SFC3	195
A0A2U3TZL8	727
A0A494C0M7	9
A0A494C0M7	10
A0A669KBI7	990
F5GYN0	504
K7EIJ0	42
B0S8I6	55
C9J6F5	106
C9JA93	253
C9JA93	261
J3KQY1	106
E9PD53	648
E9PIE8	225
F5H3G9	84
F5H3G9	85
F8W8F5	474
F8WA18	9
G3V1P3	118
H0YHK3	687
H0YHK3	688
H0YHK3	690
H0YCN8	159
H7BXX0	1906
H7C4H9	58
I3L4X7	83
I3NI44	314
Q8N4N8	473
Q8N4N8	479
O15479	250
O95049	181
P00451	1712
P00451	1713
P33981	773
P82933	76
P82933	85
Q5VWT5	604
Q86UK5	85
Q8N8F7	118
Q8WTR2	30
Q8WXK3	237
Q96IR7	328
Q9HBI0	171
Q9HBI0	175
Q9NQ30	179
Q9ULM0	16
Q9Y4K3	133
Q9Y573	368
C9JFU4	24
A0A0A0MTC1	1203
A0A0A0MTQ8	363
C9JE56	9
A0A2R8YFL3	244
A0A494C0T1	105
A1IGU5	367
A7MBM2	228
A8K979	244
E7EVE9	614
H0Y5F5	535
H3BM47	57
H3BM47	67
F8W9A8	432
Q96D46	162
D6RB04	8
E9PMM2	101
E9PRK3	151
P02786	633
H0Y986	72
H0YJ97	482
H0YJ97	486
H7C4L6	155
K7ERP6	243
K7ERP6	246
O43776	192
O95721	97
P07098	365
Q15058	1103
Q15058	1105
Q17RQ9	187
Q5T4F7	219
Q5T4F7	225
Q6IQ21	359
Q7Z7M9	788
Q86VS3	724
Q8IVG5	1225
Q8IVG5	1235
Q8IZT6	1991
Q8N3K9	152
Q8N490	173
Q8WUJ3	258
Q96KM6	589
Q9H611	378
Q9UJA5	115
Q9UJA5	117
E7EMV7	318
A0A0A0MTB8	146
A0A1B0GTY1	74
A0A2R8Y6T6	304
A0A2R8YD85	523
A0A3B3IRS8	56
A1A5B4	593
C9JG08	3949
F2Z2X2	468
M0R271	207
Q14332	214
Q5T0Z8	512
Q8NFY9	480
Q9NS56	819
H0YMH6	65
E9PCC8	329
E9PLK3	761
F6XGA7	105
M0R300	1620
P20916	361
P46940	1174
Q07617	416
Q7RTT5	20
Q8N3E9	252
A0A087X0M6	191
H0YHA8	96
H0YHA8	98
H0YLX2	65
C9JR56	437
H7C2K3	94
G3V5N2	106
H0YDN0	176
O00443	1154
Q9NP58	143
Q9NRC6	2979
Q9NWB6	258
Q9NWB6	260
A0A0C4DG53	432
B2CW77	47
C9J512	118
E9PLP8	151
N0DVX5	2194
Q76KD6	426
Q8IWN7	1093
Q9H4S2	255
A0A2R8Y523	516
A0A494C1V2	346
E5RGX4	107
E9PQL1	50
F2Z309	79
K7EJ38	47
O75691	633
P52746	269
Q6NT04	405
Q8TEQ6	1436
Q96DY7	520
Q9C0K1	217
Q9H598	113
A0A087WX48	182
A0A087X0C3	37
H0YEJ7	96
H0YEJ7	99
E5RH41	136
F8VPF7	125
K7EKT4	934
K7EKT4	937
O95721	93
P05160	93
Q14126	746
Q14644	681
Q5T7N2	525
Q6IQ21	358
Q9P215	13
Q9ULL4	1496
X6R674	110
F8W9B8	158
A0A2R8Y6T6	297
Q5T7U6	108
A0A3B3IS06	1345
A0A3B3IS06	1346
B3KV94	1118
A6NMZ7	1626
B1AHB1	54
B3KRD8	314
J3QSH8	21
F8WB76	106
E9PK60	14
E9PK60	17
F5H6Q8	2
H0YKR9	51
H7C2L1	16
Q5VYK3	1169
O43264	390
Q14195	398
Q5CZC0	1247
Q5RHP9	878
Q6XPR3	17
Q76FK4	1158
Q86SE9	99
Q86TB3	1067
Q86TB3	1070
Q8IVF2	4698
Q8IVF2	4700
Q92628	783
Q92628	784
Q96I63	359
Q9HB03	266
Q9NPG3	222
Q9Y613	676
Q9Y6V0	2302
Q9Y6V0	2303
A0A087WYW3	924
H0YG99	94
Q5T8C6	44
V9GXZ1	300
J3KSJ4	115
B1AMV8	44
B4DKA4	320
B5MCY1	25
E9PS63	157
C9IZY8	444
E9PF16	130
H0YCZ2	472
G3V503	82
K7EIG7	573
M0R243	9
O75475	266
P04920	1087
P46100	952
P49643	225
Q5SZW9	13
Q5W0Q7	692
Q86TE4	162
Q9H009	108
S4R414	463
A0A0X1KG73	3533
A0A0X1KG73	3536
A0A3B3ITP6	516
A0A590UJS4	353
B1AMU7	85
E5RG44	36
H0YKB3	93
H0YKB3	97
J3QR50	75
M0R2Z8	59
P36542	39
P48065	272
Q14204	1580
Q3SX64	33
Q5T5Y3	601
Q5VT52	389
Q5VT52	391
Q6ZN84	258
S4R3K6	284
Q8IYB8	102
Q8IYB8	104
Q99797	327
Q9BVJ6	143
R4GMW4	15
R4GMW4	16
A0A087X1Z5	46
A0A5K1VW70	951
H0Y985	149
H0Y985	155
I3L4X7	75
N0DVX5	2201
P26639	694
U3KQ90	98
Q14696	95
Q14696	100
Q6ZU65	711
Q6ZU65	712
Q76KD6	421
Q7Z443	1526
Q7Z443	1527
Q7Z6Z7	3897
Q8TD17	56
Q9HCL3	154
Q9HD15	158
Q9HD15	159
Q9NZC4	290
Q9P273	1794
Q9P2F6	435
Q9UHB9	309
Q9UJT1	211
A0A087WV90	3215
A0A1B0GTM9	76
A0A2U3TZL8	724
A0A2U3TZL8	732
K7EIJ0	56
C9JE21	113
C9JE21	114
C9JE21	115
G5E971	464
H0YNM0	228
H7C369	56
H7C369	66
K7EP39	252
Q9Y250	395
Q9Y250	399
P33981	777
Q6S5L8	94
Q86W26	76
Q86X02	258
Q8IVG5	790
Q8WTR2	29
Q9BXG8	359
Q9ULM0	5
Q9ULW0	248
A0A096LP59	242
A0A1W2PR53	1055
A0A1W2PR53	1056
A0A2R8Y471	619
D6RDA2	76
D6RDA2	77
A0A590UJN0	325
A0A590UJR0	573
A0A5F9ZHU7	444
A6NGD5	370
D6R939	379
E7ENL6	394
H0Y986	67
H0YEU3	40
I3L170	72
K7EKF6	3
K7ER08	217
O14686	5504
O95218	137
P05160	89
P49137	299
Q5SQQ9	325
Q5T2E6	231
Q5T7N2	531
Q8N3K9	148
Q96KM6	586
Q96QV1	247
Q9UJA5	120
Q9ULM6	85
Q9UNL4	130
Q9UNL4	131
A1XBS5	107
A6NHX0	29
O60841	1160
Q4KMX7	134
P15088	395
Q17RS7	788
Q17RS7	792
Q5VTH9	382
Q9UMZ2	716
O43151	348
Q03001	2974
Q15022	329
Q15022	330
Q16644	184
Q8NB59	508
Q96NY9	465
Q96NY9	467
Q9NVM6	225
Q9NXG0	1049
Q9P0V3	866
Q96QR8	55
Q2LD37	3194
Q6UXB0	9
Q96RP7	337
Q9UBB5	301
A6NK06	368
B2RXH4	129
O43252	593
Q12929	78
Q702N8	229
Q96M86	1227
Q99574	153
O00370	1257
O94823	627
P19793	440
P31751	386
P31751	387
Q9BY66	101
P60903	18
Q13227	83
Q13459	443
Q13459	445
Q4G0X9	492
Q6PEY0	208
Q6PEY0	213
Q9BT92	86
Q9NSG2	523
O14827	500
Q9Y6J9	120
P17480	532
P35442	76
O75976	767
Q14683	844
Q5BKZ1	299
Q6ZNE9	334
Q96K76	304
Q96K76	306
Q99767	409
Q99767	412
Q9H2G9	335
Q9H9Q4	160
Q9Y2X3	67
A8MT19	224
P35659	344
P45844	55
Q96QR8	51
Q13085	825
Q16644	179
Q7Z2Y8	1837
Q8N7B9	7
Q8N7B9	9
Q8NEE8	21
Q9Y4W6	90
A8MPP1	503
A8MPP1	509
P11532	1718
P35442	73
Q7Z333	1167
Q8IYB7	537
Q8WWZ7	30
Q96KC8	456
Q96ST8	335
O95263	495
Q702N8	225
Q8IWV7	855
O60524	302
O60524	307
P20823	117
P51587	2860
P52740	168
Q13227	75
Q504T8	76
Q6PEY0	216
Q93100	873
Q9NSG2	519
Q9P2J9	357
O15481	167
Q0VF96	725
Q15149	4259
Q8NDM7	1308
Q9BRT8	382
Q9NSB8	290
Q9UQ07	332
P12821	601
Q5VT06	2063
Q5VT06	2065
Q96DT6	410
Q9BXM0	216
Q9BXM0	218
O95405	745
P35611	543
P49454	2794
Q06190	522
Q5VX52	424
Q5VX52	430
Q86VF7	673
Q86VF7	684
Q9H0B6	22
Q9H7E2	113
Q9H7E2	122
P46940	1442
Q6ZR08	2474
Q9BX26	1065
O60506	356
P29144	351
Q5VVJ2	348
Q9NYN1	261
Q9UG63	9
Q6ZUJ8	688
O14910	170
Q9Y2G4	463
Q8NDM7	1311
Q93073	816
Q96TA2	359
Q9UQ07	328
A8MT70	300
P05023	843
P21333	523
Q8NEE6	93
Q9BPX6	309
Q9UHN6	733
Q9UHN6	736
P49454	2786
Q15637	306
Q15643	1396
Q58FF7	202
Q96FV2	215
Q96M86	835
Q96RW7	3118
Q9UPA5	3478
Q68CZ2	422
Q9BY77	12
Q9HCJ3	198
Q9UG63	12
P0DJD0	738
Q68DA7	118
Q96HE7	352
Q9NYL9	53
O60749	480
P32004	694
Q5JVL4	601
Q6Y2X3	523
Q92990	359
Q96S79	129
Q9NQG6	326
A6NE01	2351
O14653	62
P19397	166
P51665	113
P59817	268
P59817	269
Q5VTH9	843
Q659C4	51
Q7Z5B4	240
Q7Z6Z7	977
Q8IZU3	206
Q8WVS4	994
Q9NR48	2817
O15394	757
O15394	762
O15394	766
O60307	1043
O95180	470
Q17R98	226
Q7Z3V5	75
Q86VS8	598
Q8N122	1332
Q8N8U2	150
Q9NS87	770
Q9UKN7	1887
O15078	967
O43432	472
Q68DN1	1414
P16152	198
Q9BYP7	192
Q9UKV8	241
Q3T906	1103
Q5C9Z4	818
Q96QF7	482
Q9H4L5	61
Q9H4L5	67
Q659A1	875
Q9BYP7	182
Q9UBD0	209
Q9Y2H6	528
P12883	1022
P12883	1024
Q86X95	106
Q8N608	625
Q96QF7	477
Q9Y4A5	904
O14653	57
O75325	264
P02452	1253
P0DUB6	272
Q7Z5L3	262
Q7Z5L3	267
Q7Z6Z7	973
Q8IZU3	205
O00160	727
O00160	728
Q96C00	46
Q9H9L3	50
O95180	462
Q8NFC6	365
Q8NFC6	367
Q99459	7
Q9UKN7	1883
O15078	975
P19022	120
Q8NGY3	328
F5H3Q5	1445
A0A087X1N7	1819
A0A1W2PNU5	187
E9PSC0	80
F8WEL9	31
M0QZW8	42
M0QZW8	43
K7EP06	2
Q96ST3	552
Q14152	591
Q14204	1827
Q14204	1829
Q17RD7	466
Q4G0X9	1014
Q8N141	118
Q8N4T0	64
Q9BXP2	623
Q9BZA5	12
Q9H9L3	336
A0A0A0MRA3	26764
C9J8E1	184
E9PLY0	20
H0Y7Y8	277
H0Y7Y8	278
O00533	1030
O14807	15
O14807	26
P10809	89
Q562F6	491
Q5THR3	752
Q8WXG1	298
Q96KP1	827
Q9BXP5	256
Q9HCL3	175
A0A0A0MRI1	303
A0A1W2PPZ5	199
A0A1W2PPZ5	202
A0A5F9ZHS8	652
A2A3C1	1044
A2A3C1	1046
C4AMC7	138
E9PLM8	115
O00505	121
P01266	413
Q15545	333
Q6ZSZ6	352
Q6ZSZ6	353
Q8IY21	674
Q9BRU9	172
Q9BYW2	11
H7C0A4	122
A0A087X1G6	32
A6NJR5	249
H7C5Q9	111
Q8NEM2	108
F5H1B1	224
H0YDN1	3372
J3KPJ3	163
O60673	604
P00519	816
Q9NRW1	158
Q5T0Z8	915
Q8N6L0	383
Q8NB50	643
Q9BRF8	314
Q9NYL2	538
A0A0A0MTN5	447
A0A0A0MTN5	450
B8ZZX6	287
Q15149	1224
Q5VSL9	571
Q5W0A0	327
Q9ULN7	176
Q9ULN7	178
Q9ULN7	179
A0A087WZ32	90
A0A087WZ32	91
E5RI44	49
E9PRL4	33
J3KSK6	293
K7EN81	228
Q6ZUB1	1289
Q6ZUB1	1291
A0A075B6G6	435
A0A0D9SFK2	6
K7EN58	72
A0A0D9SFJ2	35
A0A1W2PPR9	226
A0A590UJN0	319
Q68CT8	73
P11387	333
Q14814	511
Q5SW24	105
A0A087WW88	64
A0A087WW88	67
A0A0A0MT33	103
A0A0C4DH01	402
A0A0G2JNU3	1271
A0A2R8YGQ5	1287
A0A2R8YGQ5	1294
A0A384DVL8	913
A0A384DVL8	915
A0A494C108	648
A0A494C108	649
A0A5F9ZH90	207
C9JE76	39
E9PSC0	84
F8WBJ1	55
F8WEL9	34
H0YDE6	71
H0YE03	402
H0YE03	405
I3L1A7	53
I3L1A7	61
K7ERW6	5
K7ERW6	12
W0S4B9	202
Q14674	515
Q14674	516
Q6N065	222
Q6UXY1	135
Q8IYU8	273
Q8IYU8	280
Q8WXA8	196
Q9ULL0	1248
A0A2R8Y4D7	168
H0YNU5	629
A0A499FJK2	56
C9J8E1	179
E5RH56	69
F6WQW2	244
F6WQW2	245
H0Y2M6	770
H0Y589	401
I3L2N8	26
O76038	56
P51786	412
Q8WXG1	334
Q9BQG1	180
E9PJR2	405
H0YM35	55
P08567	238
Q8IWR0	574
Q9BRU9	179
Q9Y230	204
Q9Y2P5	317
P31939	331
S4R411	136
Q96N58	266
A0A0A0MQZ3	123
A0A1C7CYW9	105
H0Y9K3	429
A2RTY3	400
N0DVX5	2248
Q02363	47
Q9NRW1	164
Q9NYL2	544
Q99829	20
Q99829	25
H0YDJ4	1074
H0YDJ4	1076
E7EWP9	624
F5H212	1271
H0Y6N7	407
Q8IYX3	269
Q96NB2	170
Q6P452	221
A0A0D9SFJ2	37
A0A0J9YVW6	55
A0A3B3ITR6	99
Q68CT8	76
A8MT70	529
H0Y718	321
H0Y718	322
H0Y8C3	176
P11387	336
Q8IZT6	654
Q9HBD4	1395
E9PDB0	261
H7BZ98	110
B4DJS2	51
H0Y4S6	164
O60925	97
F8WCL7	244
H0YM35	62
O00139	336
Q7Z5P9	7836
A0A0C4DGY0	70
E9PK69	288
C9J5I7	43
Q16720	1064
A0A0C4DFY3	885
B1B0D4	94
F5H6D6	146
F5H6D6	149
A0A0J9YVW6	56
Q9Y4D2	404
A0A590UJ53	577
G3V1B0	63
A0A1P0AZG4	939
A0A2R8Y714	648
A0A2R8Y7H4	102
C9JYB8	385
E7ESC9	500
E7ESC9	502
F5H619	296
F8W9S7	1132
H9KVB4	2936
O15144	290
Q5TEJ7	149
P22223	132
P22223	135
P48775	323
Q14574	42
Q32NC0	201
Q5T4S7	3564
Q6VUC0	186
Q6VUC0	187
Q6ZNB6	507
Q8IVG5	680
Q8IVG5	681
Q9P275	1091
Q9P275	1100
Q9UDR5	825
Q9Y597	237
E9PLX9	122
A0A090HNM7	882
A0A090HNM7	884
Q5JRI7	170
Q5JRI7	173
A0A0D9SFR6	474
A0A0S2Z4L7	102
H7C0S8	37
C9JT67	792
C9JG08	825
H0YCZ2	370
F5H746	7
F5H746	9
H0YD12	55
O60869	143
O60869	148
P15927	145
Q01201	62
Q08378	362
Q15751	458
Q15751	459
Q5W041	51
Q6PCB5	450
Q86XZ4	527
Q86XZ4	528
Q92522	106
Q92522	115
Q9BRX8	65
Q9BRX8	67
Q9C073	369
Q9NW75	62
A0A075B7B1	280
A0A286YF92	299
A0A494C1D7	1764
A0A669KB69	97
A2A2S5	51
A5YKK6	1218
H7C223	15
H7C223	19
C9JG08	1935
C9JGI3	43
D6RC76	172
E9PNF6	6
E9PNF6	7
F5H435	152
H0YDN1	1114
H7C4M9	52
O00267	639
O94887	652
O94887	655
O95714	1231
P04844	243
P0DKX0	161
P10244	584
P49327	1495
P50991	531
Q8NDV3	499
Q9BV73	959
Q9NQU5	412
E7EUL6	719
E7EUL6	721
E5RK98	47
O95235	560
Q8WYQ5	673
F5H8K3	345
E7ENN3	2851
E7ENN3	2853
E9PG22	436
G3XAE0	293
H0YKG4	13
P01023	896
Q96I27	29
Q9UBL6	329
A0A087WVY5	971
H0YEP2	91
A0A0B4J1Y2	488
A0A1B0GWA2	368
A0A1B0GWA2	370
F5H008	83
A0A2U3TZV8	340
E5RJ39	118
E5RJ39	120
H7C5R1	608
F5GWH6	86
F5H088	220
F5H088	222
H0Y517	16
H0Y8H1	77
H3BQN4	14
H7C1W4	225
H7C352	120
P20700	452
Q8NA97	97
Q8TD19	908
Q9BX84	741
Q9NYL2	680
J3KNQ3	294
H0YM61	428
A0A0G2JIZ4	154
A0A0G2JIZ4	157
A0A0G2JIZ4	158
A0A0G2JNQ3	271
C9JJZ7	50
E7EX40	160
E9PDH4	347
E9PDH4	356
H0YAU5	235
H0YAU5	239
P55884	734
Q70J99	235
Q9NSV4	681
Q9Y6V0	3256
A0A087WXQ8	68
A0A0A0MRA3	7255
F5H2N6	636
O60566	393
Q5VWC8	228
Q8NF50	585
Q9C0D5	3
O60882	116
A0A075B730	2728
A0A087WTW5	1263
A0A087WYS1	172
A0A087WYS1	173
A0A0J9YW64	1752
A0A2R8Y714	658
A0A669KBF1	471
C9JBM0	173
E7EMZ9	662
E7ETR0	208
E9PIF9	43
G3V1S3	738
H9KVB4	2934
I3L2K5	484
M0R1M3	61
O15144	295
O95429	418
P18669	176
P19525	408
Q4G0P3	3994
Q6NUP7	669
Q6UX06	112
Q93073	242
A0A494C1Q1	48
E5RFS7	37
E5RFS7	39
A0A087WX60	689
A0A087WX60	693
C9JNZ1	161
C9JNZ1	162
A0A0A0MTS9	32
A0A0D9SFR6	477
A0A2R8Y6H3	1496
A0A3B3IU23	661
A0A5F9ZH29	165
H7BXL8	377
E9PDI4	196
F8W6S9	35
H0YA96	141
H0YA96	142
O14965	365
O60240	196
P05388	162
P05388	166
P11388	431
Q15459	391
Q6P9A3	223
Q6UVJ0	439
Q8NEG7	540
Q9H040	341
Q9ULW8	595
A0A494C1D7	1759
B7Z7N5	532
B7Z7N5	536
O14646	347
O14646	348
O95714	1236
Q14693	770
Q14693	771
K7ELE1	397
F8VRX1	732
H0YIK5	130
J3KRQ4	52
P10244	580
Q00534	279
Q92665	254
M0QZB5	534
H0Y4W2	619
F8WCD0	277
H3BN68	60
Q08462	586
Q86XZ4	294
Q8IY81	845
Q93008	506
A0A087WX12	134
A0A0C4DGF0	287
C9J7Z4	327
C9J7Z4	330
D6RBP4	53
D6RJD8	38
D6RJD8	41
E7EQL2	641
P21399	852
Q8TD19	915
A0A6I8PRP6	402
H0Y858	388
H9KVB3	1618
Q8IY81	328
A0A0C4DG33	368
A0A0C4DG33	369
D6RJA6	138
D6RJA6	139
E7ESJ2	659
I3L0G6	512
I3L0G6	515
P07900	410
Q9BTV7	183
A0A2R8Y5K2	439
A0A0G2JMG3	872
A0A590UJM5	437
H7BZ37	86
Q8TB73	356
J3KRK3	7
F5H7B7	479
D6RFY1	19
E9PNF6	3
P16519	128
Q9H9J2	226
Q9Y5G8	596
S4R3D7	76
E9PFX5	228
E9PG22	419
F8WCD0	279
H3BUI8	198
A0A087WX12	129
A0A087X097	2804
H0YCZ2	1266
H7BY35	1358
Q9NPB8	150
Q9NPB8	151
Q9UIK5	253
F5H9F7	128
E7ESW6	2140
O43678	13
O95789	973
P05556	398
P26639	306
Q6UVJ0	465
Q8TAK6	109
H0Y9U8	52
O60566	400
H0Y380	882
P24298	483
H3BMM1	1207
C9J338	259
H0Y7V6	91
H0YDG2	102
Q8IY18	595
K7ENR9	27
A0A1B0GTC0	90
H1UBN3	324
C9JQQ5	164
Q6P2C6	253
Q9UNQ0	251
C9JMH2	35
F8W9Z1	1765
Q8N412	204
Q8N412	210
Q8TCU3	10
Q9UQR0	64
Q96RL1	305
K7EPM2	11
B5MCE1	318
F8W0U9	704
H7C118	58
K7EM17	70
K7EM17	71
Q8TCU3	6
Q9Y4Z2	79
A0A087WYA1	1887
A0A5K1VW97	1948
A0A0A0MRA3	11026
A0A6E1Y6F7	931
A0A6E1Y6F7	936
A0AVT1	963
J3QRX1	110
E7ER26	769
H3BPS6	3
F8W922	129
P49454	919
Q07092	1449
Q49AH0	75
Q5TCQ9	1412
Q86XT4	283
Q99611	58
A0A087X2D8	97
A0A087X2D8	102
A0A3B3ISQ1	65
P48634	819
Q008S8	453
Q7Z494	1087
Q99928	53
Q9BST9	44
Q9NWU2	215
I3L4C0	105
Q2YDW8	108
E9PH18	208
H0YLT1	16
K7EPH5	82
Q8TC07	597
Q92786	346
H0Y786	1136
A0A0A0MRE9	2587
A0A140TA65	79
A0A140TA65	87
B1AQ67	81
C9JIX7	174
P0C671	14
P0C671	15
Q8TEK8	182
H7C557	1081
P48960	731
Q7RTY7	412
Q9Y3B7	73
C9JAW0	113
K7EQL6	1207
A0A087WW66	838
O95782	57
A1A4Z1	179
A8MW95	409
C9JS30	749
M0QZQ3	231
Q9Y238	233
C9JFP6	64
E9PIN8	7
O95989	3
Q8NCR0	486
Q8NCR0	488
Q9NXL2	16
Q9NXL2	17
A0A087WYA1	1883
A0A0A0MRA3	11018
K7EKZ0	218
K7EKZ0	222
A0A1D5RMR8	5
Q5JYW6	50
E7ER26	772
F8W922	128
Q5TCQ9	1409
Q96ND8	180
A0A075B719	515
A0A075B774	505
A0A0A0MS97	155
H0Y390	3247
C9JHU5	511
G5E9S8	12
E9PQR0	225
F5H6M0	114
H0YBG8	18
H0YCU9	14
S4R2Y3	30
S4R2Y3	35
P11717	1990
P56192	554
Q5TAH2	399
R4GMZ7	59
Q8N895	534
Q93008	2301
Q93034	501
A0A075B739	46
Q5JRI7	157
C9J5F6	379
E9PN78	280
F5H0E0	108
F8WAD8	534
H0YNS4	41
K7EQQ1	99
O95948	13
P10643	593
Q14680	491
Q6PI77	63
Q6PI77	65
Q6PI77	71
Q92786	353
Q96JB3	30
J3KRZ8	417
J3KRZ8	420
F2Z3C1	78
Q9Y3Q4	588
A0A0A0MRS1	355
E3W994	276
A0A2R8YFE7	85
K7EQB2	72
O14863	345
Q15067	510
Q15067	512
Q6V0I7	4052
Q6V0I7	4053
A0A0C4DGY8	18
H3BR89	137
A6NKB5	94
Q15075	1112
Q9P2G4	520
A0A087WW66	827
P0DO97	240
Q5VU65	993
Q9H4Z3	313
E9PS71	72
H0YB89	86
H7C4T4	106
Q3KP31	568
Q5T985	419
O95158	98
Q6P9A2	269
Q8N895	541
Q9NUD5	162
A0A2R8Y491	319
P78527	2268
D6RHY3	79
Q9Y6E7	55
H0Y8N7	174

[truncated: 5 more sheets: Human-Proteins, Cellular Component_human, Mouse-Sites, Mouse-Proteins, CC_mouse]
