# Supplementary material for: Deciphering the endogenous SUMO-1 landscape: a novel combinatorial peptide enrichment strategy for global profiling and disease association
Source: Royal Society of Chemistry journal article supplement (doi:10.1039/d4sc07379g), 2024-12-26
Supplement: d4sc07379g5.xlsx [file d4sc07379g5.xlsx]

## Sheet: SUMO1-sites-mouse-brains
Protein	Gene	Position	Site	Sequence.window	AD1	AD2	AD3	Control1	Control2	Control3	AD_number	AD_average	Control_number	Control_average	ratio	change
E9Q5F9	Setd2	1105	Setd2-1105	AYEEEYESKGCSQTEKYFLHKGTERSAESCY	63090000	0	0	0	0	0	1	63090000	0	0	63090001	up
E9Q5F9	Setd2	1110	Setd2-1110	YESKGCSQTEKYFLHKGTERSAESCYSQFGR	63090000	0	0	0	0	0	1	63090000	0	0	63090001	up
F8VPN2	Tex15	991	Tex15-991	DSLSTEPSNVTVMNDKSKCPTKSKPVFNDTR	102870000	0	0	0	0	0	1	102870000	0	0	102870001	up
F8VPN2	Tex15	993	Tex15-993	LSTEPSNVTVMNDKSKCPTKSKPVFNDTRNK	102870000	0	0	0	0	0	1	102870000	0	0	102870001	up
O09046	Il4i1	160	Il4i1-160	WTEVHNVKLRNYVVEKMPEKLGYNLNNRERG	0	0	0	0	0	0	1	0	0	0	1	nochange
P21271	Myo5b	1398	Myo5b-1398	VEKLEKNERKLKKQLKIYMKKVQDLEAAQAL	65438000	0	0	16770000	21807000	0	1	65438000	2	19288500	3.39259	up
P58681	Tlr7	964	Tlr7-964	QLSKKTVFVMTQKYAKTESFKMAFYLSHQRL	80555000	0	0	0	0	0	1	80555000	0	0	80555001	up
Q3U1D9	Cd047	161	Cd047-161	GKKGTGYGYANVTIGKQLSHSSDLYDAARQS	21896000	0	0	0	0	0	1	21896000	0	0	21896001	up
Q4FZC9	Syne3	550	Syne3-550	LLQRKSKLQSLLVQHKDFGVAFDPLNRKLLD	92318000	61076000	212690000	0	0	0	3	122028000	0	0	122028001	up
Q6AZB0	Boc	43	Boc-43	NEVPQVTVQPMSTVQKLGGTVILGCVVEPPW	0	0	0	0	0	0	1	0	0	0	1	nochange
Q6NVF4	Helb	1018	Helb-1018	KRIGDGFPFDEESPSKFRMVEAPSPQVSSVF	0	0	0	0	0	0	1	0	0	0	1	nochange
Q6PFX9	Tnks	1029	Tnks-1029	EGEVAGLDMNISQFLKSLGLEHLRDIFETEQ	0	0	0	94229000	0	0	2	0	1	94229000	1.06124e-08	down
Q7TPS5	C2cd5	552	C2cd5-552	LLPFMEYEVHTQLMNKLKLKGMNALFGLRIQ	381200000	0	232930000	0	0	0	3	204710000	0	0	204710001	up
Q80SU7	Gvin1	406	Gvin1-406	SLNIYIMGSYSGFGVKVGASVNIANSNSETA	174610000	0	0	0	0	0	1	174610000	0	0	174610001	up
Q80YS5	Lrrc27	315	Lrrc27-315	NVKEKKHRKPWPAVRKRSTSFKGILPNLPSG	111950000	0	0	0	0	0	1	111950000	0	0	111950001	up
Q8BHN7	Rlig1	81	Rlig1-81	TNYKGQPYLWARLDRKPNKQADKRFKKFLHS	12340000	0	0	0	0	0	2	6170000	0	0	6170001	up
Q8BVD5	Mpp7	341	Mpp7-341	LSRKNKKINKSMYECKKSEQYDTADVPTYEE	8732300000	6620200000	2596700000	1995050000	0	0	3	5.98307e+09	1	1995050000	2.99896	up
Q8BVD5	Mpp7	342	Mpp7-342	SRKNKKINKSMYECKKSEQYDTADVPTYEEV	8732300000	6620200000	2596700000	1995050000	0	0	3	5.98307e+09	1	1995050000	2.99896	up
Q8BZH0	Slc39a13	167	Slc39a13-167	GLWVIAGFLTFLALEKMFLNSKEDPSQAPSK	1957530000	0	0	110800000	50430000	26649000	1	1957530000	3	6.26263e+07	31.2573	up
Q8BZH0	Slc39a13	173	Slc39a13-173	GFLTFLALEKMFLNSKEDPSQAPSKDPTAAA	1957530000	0	0	110800000	50430000	26649000	1	1957530000	3	6.26263e+07	31.2573	up
Q8C172	Cers6	249	Cers6-249	VLCLHDSADALLEAAKMANYAKFQKMCDLLF	11786000	0	0	0	0	0	1	11786000	0	0	11786001	up
Q8C4A5	Asxl3	8	Asxl3-8	________MKDKRKKKDRTWAEAARLALEKH	22730000	0	0	0	0	0	1	22730000	0	0	22730001	up
Q8CIW6	Slc26a6	599	Slc26a6-599	QEMKLKRMKKAKKSQKQDASSKISSVSVNVN	64749000	0	0	0	0	0	1	64749000	0	0	64749001	up
Q8K2Z2	Prpf39	390	Prpf39-390	ERCVISCALYEEFWIKYAKYMENHSIEGVRH	286691000	0	276660000	0	0	0	2	281675500	0	0	281675501	up
Q8K4I3	Arhgef6	108	Arhgef6-108	GANFSKVLNTLLAVNKATEDQLSERPCGRSS	2266853000	1662392000	3304100000	0	42850000	228530000	3	2411115000	2	135690000	17.7693	up
Q99MV5	Mov10l1	125	Mov10l1-125	YWIRPGTWSSEAISVKPLRYKRVDKVCISSL	85741000	0	0	0	0	0	1	85741000	0	0	85741001	up
Q9D5R3	Cep83	543	Cep83-543	EEKHKLHERITDREEKYNQAKEKLQRAATAQ	0	0	0	0	0	0	1	0	0	0	1	nochange
Q9JHJ0	Tmod3	53	Tmod3-53	DLDPENALLPAGFRQKNQTSKSATGPFDRER	79576000	72692000	0	0	0	0	2	76134000	0	0	76134001	up
A0A571BF63	Ankfn1	244	Ankfn1-244	SSPNAAKRLYRNLSEKLKGSHSSFDEAYFRT	90759000	0	0	0	0	0	1	90759000	0	0	90759001	up
A0A571BF63	Ankfn1	246	Ankfn1-246	PNAAKRLYRNLSEKLKGSHSSFDEAYFRTRT	90759000	0	0	0	0	0	1	90759000	0	0	90759001	up
A2ARZ3	Fsip2	834	Fsip2-834	MVHAILEKLMILASYKKNDVPPEDTTKHFQQ	0	0	0	0	0	0	2	0	0	0	1	nochange
A2AT37	Upf2	42	Upf2-42	ERRPVSSKEKPRDDLKVTAKKEVSKVPEDKK	98119000	0	0	0	0	0	1	98119000	0	0	98119001	up
B2RU80	Ptprb	1461	Ptprb-1461	IDRPPQPPPHIRVNEKDVLISKSSINFTVNC	0	0	0	0	0	0	1	0	0	0	1	nochange
E9QAT4	Sec16a	819	Sec16a-819	NQDPPGASENLENPPKVGEEEALPVQASSGY	0	0	0	0	0	0	1	0	0	0	1	nochange
G5E8B9	Zbtb11	692	Zbtb11-692	ACQVCGKTFIYKHGLKLHQSLHQSQKQFQCE	46407000	72753000	63720000	0	0	3808600	3	60960000	1	3808600	16.0059	up
O35066	Kif3c	490	Kif3c-490	AAIQDDRSLVSEEKQKLLEEKEKMLEDLRRE	777040000	0	941530000	289389000	0	261430000	2	859285000	2	275409500	3.12003	up
P25976	Ubtf	129	Ubtf-129	KPLTPYFRFFMEKRAKYAKLHPEMSNLDLTK	0	0	0	0	0	0	2	0	0	0	1	nochange
P43300	Egr3	357	Egr3-357	FARSDERKRHAKIHLKQKEKKSEKGGAPSAS	86872000	108930000	79424000	0	0	0	3	91742000	0	0	91742001	up
P43300	Egr3	359	Egr3-359	RSDERKRHAKIHLKQKEKKSEKGGAPSASSA	86872000	108930000	79424000	0	0	0	3	91742000	0	0	91742001	up
P62880	Gnb2	127	Gnb2-127	VACGGLDNICSIYSLKTREGNVRVSRELPGH	626520000	640890000	711000000	567159000	0	447060000	3	659470000	2	507109500	1.30045	nochange
P62881	Gnb5	356	Gnb5-356	FAGYNDYTINVWDVLKGSRVSILFGHENRVS	105948000	60086000	48682000	0	0	0	3	71572000	0	0	71572001	up
Q3UHK3	Greb1	324	Greb1-324	SGPPKKRHKGWSPESKSTTDGGFIQGGGNRA	143490000	0	0	0	0	0	1	143490000	0	0	143490001	up
Q3UHK3	Greb1	340	Greb1-340	STTDGGFIQGGGNRAKHEGTSIPCVPQAGLV	143490000	0	0	0	0	0	1	143490000	0	0	143490001	up
Q3UMT1	Ppp1r12c	685	Ppp1r12c-685	LESKQEHEEPDGGFRKMYTELRRENERLREA	162650000	0	0	0	0	0	2	81325000	0	0	81325001	up
Q3UP38	Cracr2a	361	Cracr2a-361	YRVTESLQREKSGLLKQLDFLRERNKHLRDE	65033000	0	0	39013000	0	0	1	65033000	1	39013000	1.66696	nochange
Q3UYK3	Tbc1d9	1014	Tbc1d9-1014	ENRNYLKLWTAENKSKSKTAKDLPKLNQGQF	382240000	1654050000	0	0	0	0	2	1018145000	0	0	1018145001	up
Q4FZC9	Syne3	131	Syne3-131	SEYLLAQDEFYRWFQKMVVALEPPVELQLGL	111460000	0	0	0	0	0	1	111460000	0	0	111460001	up
Q5NCI0	Urgcp	484	Urgcp-484	CQKAKDRMEKILRKIKDVDAYKRDELRLQGE	0	0	0	0	0	0	1	0	0	0	1	nochange
Q5SSI6	Utp18	325	Utp18-325	SMHSKVLYVYDMLAGKLIPVHQVRGLKEKTV	14123000	0	0	0	0	0	1	14123000	0	0	14123001	up
Q64112	Ifit2	407	Ifit2-407	HYMEGVKIKKKTIPQKKMREKLQRIALRRLH	227890000	0	0	0	0	0	1	227890000	0	0	227890001	up
Q6TXD4	Dnmbp	783	Dnmbp-783	FGSVSTENPEQRMLEKRAKVVAELLQTERDY	162320000	0	0	0	0	0	1	162320000	0	0	162320001	up
Q6ZPJ3	Ube2o	516	Ube2o-516	SGSGTGRKKSIPLSIKNLKRKHKRKKNKVTR	56331000	0	0	0	0	0	1	56331000	0	0	56331001	up
Q6ZPJ3	Ube2o	519	Ube2o-519	GTGRKKSIPLSIKNLKRKHKRKKNKVTRDFK	56331000	0	0	0	0	0	1	56331000	0	0	56331001	up
Q76LL6	Fhod3	1366	Fhod3-1366	MSEFLKDCAERIIILKIVHRRIINRFHSFLL	27528000	0	0	0	0	0	1	27528000	0	0	27528001	up
Q811D2	Ankrd26	104	Ankrd26-104	CAYGHPEVVTLLVERKCEIDARDSESSTALI	261710000	0	0	0	0	0	1	261710000	0	0	261710001	up
Q8BG94	Commd7	161	Commd7-161	GSSELEKVGSIFLQLKLVVKKGKQTENLYME	3139700000	0	0	0	0	0	1	3139700000	0	0	3139700001	up
Q8CFT2	Setd1b	891	Setd1b-891	VEVVAFRAFDEWWDKKERMAKASLTPVKSGE	49323000	0	0	0	0	0	1	49323000	0	0	49323001	up
Q8CGY6	Unc45b	451	Unc45b-451	ADQLVAVEALIHASTKLSRATFIITNGVTLL	202900000	1033200000	324170000	0	0	92550000	3	520090000	1	92550000	5.61956	up
Q8CI12	Smtnl2	317	Smtnl2-317	LPRTSGAQARKALFEKWEQDTASKGKGETRA	195090000	0	0	0	0	0	1	195090000	0	0	195090001	up
Q91Y44	Brdt	823	Brdt-823	KIKNADSWKSLGKPVKASSVLKSSDELFNQF	571641000	688580000	701230000	0	0	0	3	653817000	0	0	653817001	up
Q91Y44	Brdt	829	Brdt-829	SWKSLGKPVKASSVLKSSDELFNQFRKAAIE	571641000	688580000	701230000	0	0	0	3	653817000	0	0	653817001	up
Q9D1E6	Tbcb	211	Tbcb-211	RYDEPLGKNDGSVNGKRYFECQAKYGAFVKP	473260000	630460000	649950000	0	0	0	3	5.84557e+08	0	0	5.84557e+08	up
Q9DBQ9	Swt1	37	Swt1-37	MSIKESCAKEEKSQKKQTISSPTFNEDKKKG	123850000	0	106380000	0	0	0	2	115115000	0	0	115115001	up
Q9JIP4	Panx1	155	Panx1-155	KFIMEELDKVYNRAIKAAKSARDLDLRDGPG	0	0	0	0	0	0	1	0	0	0	1	nochange
Q9JIP4	Panx1	158	Panx1-158	MEELDKVYNRAIKAAKSARDLDLRDGPGPPG	0	0	0	0	0	0	1	0	0	0	1	nochange
Q9JLC4	Sorcs1	483	Sorcs1-483	DLYEVAGIKGMFLANKKIDNQVKTFITYNKG	44912000	0	0	0	0	0	1	44912000	0	0	44912001	up
Q9Z315	Sart1	742	Sart1-742	TPKEAFRQLSHRFHGKGSGKMKTERRMKKLD	54924000	23037000	0	0	0	0	3	25987000	0	0	25987001	up
Q9Z315	Sart1	746	Sart1-746	AFRQLSHRFHGKGSGKMKTERRMKKLDEEAL	54924000	0	0	0	0	0	1	54924000	0	0	54924001	up
O55017	Cacna1b	374	Cacna1b-374	FAKERERVENRRAFLKLRRQQQIERELNGYL	0	0	0	0	0	0	1	0	0	0	1	nochange
P08003	Pdia4	211	Pdia4-211	APWCGHCKKLAPEYEKAAKELSKRSPPIPLA	13197000	0	0	0	0	0	1	13197000	0	0	13197001	up
P14152	Mdh1	205	Mdh1-205	TQYPDVNHAKVKLQGKEVGVYEALKDDSWLK	0	0	0	0	0	0	1	0	0	0	1	nochange
P28660	Nckap1	344	Nckap1-344	EAAVSHAGSMHRERRKFLRSALKELATVLSD	36133000	0	0	0	0	0	1	36133000	0	0	36133001	up
P46460	Nsf	587	Nsf-587	KMIGFSETAKCQAMKKIFDDAYKSQLSCVVV	70063000	0	0	0	0	0	1	70063000	0	0	70063001	up
P61372	Isl1	78	Isl1-78	GKTYCKRDYIRLYGIKCAKCSIGFSKNDFVM	365770000	372830000	0	0	0	0	2	369300000	0	0	369300001	up
Q5BU09	Eapp	116	Eapp-116	FYDEIYFDSDSEDEDKTVTKKKKKKQHRIPT	56138000	0	0	0	0	0	1	56138000	0	0	56138001	up
Q5DTT1	Nexmif	578	Nexmif-578	DASETTVNLSENQLSKYAKLSPLKGFWQKKK	0	0	0	0	0	0	1	0	0	0	1	nochange
Q61210	Arhgef1	300	Arhgef1-300	LKVEADAEKPGPADRKGGLGMSSRDRTVGTP	704660000	0	0	0	0	0	1	704660000	0	0	704660001	up
Q61818	Rai1	1384	Rai1-1384	RNPASRSLKGKLLNSKKLSSAADCPKAEAFM	0	0	0	0	0	0	1	0	0	0	1	nochange
Q61818	Rai1	1385	Rai1-1385	NPASRSLKGKLLNSKKLSSAADCPKAEAFMS	0	0	0	0	0	0	1	0	0	0	1	nochange
Q62092	Nsg1	11	Nsg1-11	_____MVKLGNNFAEKGTKQPLLEDGFDTIP	0	0	0	0	0	0	1	0	0	0	1	nochange
Q62092	Nsg1	14	Nsg1-14	__MVKLGNNFAEKGTKQPLLEDGFDTIPLMT	0	0	0	0	0	0	1	0	0	0	1	nochange
Q6NXI6	Rprd2	1029	Rprd2-1029	KVLASTISTTSTIEFKNMLKNASRKPSDDKH	0	0	0	0	0	0	1	0	0	0	1	nochange
Q6P2L7	Golm2	196	Golm2-196	KKLADQFLQEQKETHKIQSNDGKELGRNDHG	29876000	0	0	0	0	0	1	29876000	0	0	29876001	up
Q6PAC4	Pcare	538	Pcare-538	KELRNPQAQEMILKMKEAISERIKFVPEPSR	315560000	547330000	0	143100000	0	0	2	431445000	1	143100000	3.01499	up
Q6VGS5	Ccdc88c	961	Ccdc88c-961	DDGHGDGKGKTESALKTTLAMKEEKIVFLEA	896840000	0	359470000	0	0	0	2	628155000	0	0	628155001	up
Q80WV3	Chst2	304	Chst2-304	ARFEEECRKYRTLVIKGVRVFDVAVLAPLLK	0	0	0	0	0	2347800	2	0	1	2347800	4.2593e-07	down
Q8BK58	Hspbap1	296	Hspbap1-296	ARVEEAITRMLVCTLKTAEDPHHPRTWLNPT	152852000	400160000	652276000	479023000	293010000	501928000	3	4.01763e+08	3	4.24654e+08	0.946095	nochange
Q8BWA5	Klhl31	185	Klhl31-185	ENCMYVVNIAETYSLKNAKATAQKFIRDNFI	108268000	0	70786000	70100000	63754000	35166400	2	89527000	3	5.63401e+07	1.58904	nochange
Q8BWA5	Klhl31	188	Klhl31-188	MYVVNIAETYSLKNAKATAQKFIRDNFIEFA	108268000	0	70786000	70100000	63754000	35166400	2	89527000	3	5.63401e+07	1.58904	nochange
Q8BYH3	Trmt13	230	Trmt13-230	VERVTTRFKVDGKHRKKDSVFERLQIDIQHL	35339000	0	0	0	0	0	1	35339000	0	0	35339001	up
Q8C9W3	Adamts2	672	Adamts2-672	HLYCESKETGEVVSMKRMVHDGTRCSYKDAF	0	0	0	3535200	0	0	2	0	1	3535200	2.82869e-07	down
Q8K224	Nat10	1021	Nat10-1021	KKLKKRDNNRKDMKLKRKK____________	108280000	0	0	0	0	0	1	108280000	0	0	108280001	up
Q8R2U0	Seh1l	208	Seh1l-208	SMAKVQIFEYNENTRKYAKAETLMTVTDPVH	2951700000	0	6817100	0	0	0	2	1479258550	0	0	1479258551	up
Q8VDG6	Map3k21	567	Map3k21-567	RGRNMVFRQEDFEDVKRSFKKKGCTWGPSSV	333089000	0	0	0	0	0	1	333089000	0	0	333089001	up
Q925T6	Grip1	1090	Grip1-1090	NKLDLVISRNPLASQKSIEQPALPSDWSEQN	14516000	0	0	0	0	0	2	7258000	0	0	7258001	up
Q9CU62	Smc1a	170	Smc1a-170	FEEISRSGELAQEYDKRKKEMVKAEEDTQFN	0	0	0	0	0	0	1	0	0	0	1	nochange
Q9CZB6	Med7	33	Med7-33	IKEYTDENIQEGLAPKPPPPIKDSYMMFGNQ	520330000	0	0	0	0	0	1	520330000	0	0	520330001	up
Q9D5Y1	Ccdc39	337	Ccdc39-337	SSDLQALRKNISKVKKDIFDETLRLQKLKHH	307480000	1870000000	1130900000	0	0	0	3	1.10279e+09	0	0	1.10279e+09	up
Q9QXS1	Plec	3772	Plec-3772	VTKERMIIIIIEIIEKTEIIRQQNLASYDYV	19709000	0	0	0	0	0	1	19709000	0	0	19709001	up
Q9WUM4	Coro1c	337	Coro1c-337	KRGLDVNKCEIARFFKLHERKCEPIIMTVPR	66661000	0	0	0	0	0	1	66661000	0	0	66661001	up
A2AHJ4	Brwd3	765	Brwd3-765	NAKGDLEVSLYTVEKKKKPSYPIQRNDYQPS	2664700000	0	0	0	0	0	1	2664700000	0	0	2664700001	up
A2AHJ4	Brwd3	767	Brwd3-767	KGDLEVSLYTVEKKKKPSYPIQRNDYQPSCG	2664700000	0	0	0	0	0	1	2664700000	0	0	2664700001	up
E9Q286	Ice1	2155	Ice1-2155	RLGQLGLKEGFPTAVKNISSVIGMFIQHAQD	0	0	0	0	0	0	1	0	0	0	1	nochange
O08989	Mras	15	Mras-15	_MATSAVPSENLPTYKLVVVGDGGVGKSALT	663300000	1167300000	567890000	0	0	0	3	7.99497e+08	0	0	7.99497e+08	up
O08989	Mras	26	Mras-26	LPTYKLVVVGDGGVGKSALTIQFFQKIFVPD	663300000	1167300000	567890000	0	0	0	3	7.99497e+08	0	0	7.99497e+08	up
P04186	Cfb	442	Cfb-442	VGPLVDSVNINALASKKDNEHHVFKVKDMED	0	0	0	0	0	0	3	0	0	0	1	nochange
P04186	Cfb	443	Cfb-443	GPLVDSVNINALASKKDNEHHVFKVKDMEDL	0	0	0	0	0	0	3	0	0	0	1	nochange
P0DM40	Fer1l5	1214	Fer1l5-1214	EGEILASCELILETQKLKELHPPILSIPCKD	420330000	355890000	0	0	0	0	2	388110000	0	0	388110001	up
P0DM40	Fer1l5	1216	Fer1l5-1216	EILASCELILETQKLKELHPPILSIPCKDGI	420330000	355890000	0	0	0	0	2	388110000	0	0	388110001	up
P27612	Plaa	537	Plaa-537	AYRSAASKTVNIYFPKKEALTFDQANPTQIL	594000000	0	0	0	0	0	1	594000000	0	0	594000001	up
P27612	Plaa	538	Plaa-538	YRSAASKTVNIYFPKKEALTFDQANPTQILG	594000000	0	0	0	0	0	1	594000000	0	0	594000001	up
P58682	Tlr8	740	Tlr8-740	EARNLVHLDLSFNTIKMINKSSLQTKMKTNL	98273000	0	0	0	0	0	1	98273000	0	0	98273001	up
P63137	Gabrb2	239	Gabrb2-239	FSTGSYPRLSLSFKLKRNIGYFILQTYMPSI	16896000	29536000	14138000	0	0	0	3	20190000	0	0	20190001	up
Q60662	Akap4	476	Akap4-476	NQSLEFSAMKAEMKGKDKCKSKADPCCKSLT	141510000	0	0	0	0	0	1	141510000	0	0	141510001	up
Q6NWW9	Fndc3b	189	Fndc3b-189	LYGMSSYVTREDQYSKPPHKKLKDRQIDRQN	0	0	0	0	0	0	3	0	0	0	1	nochange
Q80XJ3	Ttc28	121	Ttc28-121	LDDAIKARLLNPKWPKAYFRQGVALQYLGRH	142900000	0	0	0	0	0	1	142900000	0	0	142900001	up
Q8BH53	Cfap69	67	Cfap69-67	IIKVLEEEDKDVSEEKQLNYIKKLIHCYQNG	38102000	0	0	0	0	0	1	38102000	0	0	38102001	up
Q8BNA6	Fat3	3085	Fat3-3085	SGNNEFFLDPESGELKTLAVLDRERVPVYNL	89115000	0	0	0	0	0	1	89115000	0	0	89115001	up
Q8BW94	Dnah3	2335	Dnah3-2335	ITDDNIRSLFFGDYLKPESDQKIYDEIIDLR	72228000	0	0	0	0	0	1	72228000	0	0	72228001	up
Q8C0Y0	Ppp4r4	701	Ppp4r4-701	MFQKKNYEKDLLDQEKEREELLFLEMEQLEK	17548000	0	0	0	0	0	1	17548000	0	0	17548001	up
Q8QZY2	Glyctk	195	Glyctk-195	SALLPAPIPPVTLEEKQMLTKLLAARGATIQ	35610000	0	0	0	0	0	1	35610000	0	0	35610001	up
Q8VC19	Alas1	42	Alas1-42	LFYAQNCPKMMEVGAKPAPRTLSTSAVHCQQ	0	0	0	0	0	0	3	0	0	0	1	nochange
Q91YE9	Nt5c1b	202	Nt5c1b-202	MPKTREYPRTPPTEWKPYAQRRLQYGTSVDM	73482000	0	0	0	0	0	1	73482000	0	0	73482001	up
Q921G8	Tubgcp2	623	Tubgcp2-623	LTLSGLEAFSFDYMVKWPLSLIINRKALTRY	949190000	1529900000	1426300000	0	0	0	3	1.3018e+09	0	0	1.3018e+09	up
A2A9A2	Dmrta2	194	Dmrta2-194	AGGAEAKLQKFDLFPKTLLQAGRPDSPQPPP	63673000	129440000	59719000	0	0	2468200	3	8.42773e+07	1	2468200	34.1452	up
P50296	Nat3	259	Nat3-259	FNYKDNIDLVEFKTLKEEEIEEVLKSVFGIH	199210000	0	125360000	0	0	0	2	162285000	0	0	162285001	up
P63038	Hspd1	387	Hspd1-387	QEITEQLDITTSEYEKEKLNERLAKLSDGVA	0	0	0	0	0	0	1	0	0	0	1	nochange
P63038	Hspd1	389	Hspd1-389	ITEQLDITTSEYEKEKLNERLAKLSDGVAVL	0	0	0	0	0	0	1	0	0	0	1	nochange
P70248	Myo1f	727	Myo1f-727	KYEEMREEASNILLNKKERRRNSINRNFVGN	0	167550000	32839000	0	0	0	3	6.67963e+07	0	0	6.67963e+07	up
P70248	Myo1f	728	Myo1f-728	YEEMREEASNILLNKKERRRNSINRNFVGNY	0	167550000	32839000	0	0	0	3	6.67963e+07	0	0	6.67963e+07	up
Q1WG82	Zglp1	128	Zglp1-128	ISSATSPASLQRRPRKQLNPRMGIEKVDPRF	0	0	0	0	0	0	1	0	0	0	1	nochange
Q3TZW7	Bex6	46	Bex6-46	HLLEEVETKNPGGYVKRKVRRLVCNFRWPTP	0	0	0	0	0	0	1	0	0	0	1	nochange
Q3TZW7	Bex6	48	Bex6-48	LEEVETKNPGGYVKRKVRRLVCNFRWPTPNR	0	0	0	0	0	0	1	0	0	0	1	nochange
Q61146	Ocln	383	Ocln-383	SSNGNLETPSKRAPTKGKAGKGKRTDPDHYE	0	0	0	0	0	0	1	0	0	0	1	nochange
Q69ZL1	Fgd6	841	Fgd6-841	DPLEDKQDEDAGMKSKVHHIAKEIMSSEKVF	268380000	0	0	0	0	0	2	134190000	0	0	134190001	up
Q69ZL1	Fgd6	847	Fgd6-847	QDEDAGMKSKVHHIAKEIMSSEKVFVDVLKL	268380000	0	0	0	0	0	2	134190000	0	0	134190001	up
Q6NXK5	Dusp11	59	Dusp11-59	MPGTRFIAFKVPLQKKFEAKLMPEECFSPLD	10101000	0	0	0	0	0	1	10101000	0	0	10101001	up
Q6NXK5	Dusp11	63	Dusp11-63	RFIAFKVPLQKKFEAKLMPEECFSPLDLFNK	10101000	0	0	0	0	0	1	10101000	0	0	10101001	up
Q6ZPZ3	Zc3h4	1194	Zc3h4-1194	GKGSASKAKEPPFVRKSALEQPETGKASTDG	182890000	0	0	0	0	0	1	182890000	0	0	182890001	up
Q8CCJ3	Ufl1	787	Ufl1-787	QELSLSIKDLVLKSRKSSVTEE_________	863310000	833280000	0	0	0	0	2	848295000	0	0	848295001	up
Q8CH72	Trim32	283	Trim32-283	ASLPRELTLQDVELLKVGHVGPLQIGQAVKK	162600000	0	0	266458000	0	0	1	162600000	1	266458000	0.610228	nochange
Q8CH72	Trim32	297	Trim32-297	LKVGHVGPLQIGQAVKKPRTVNMEDSWAGEE	162600000	0	0	266458000	0	0	1	162600000	1	266458000	0.610228	nochange
Q8CH72	Trim32	298	Trim32-298	KVGHVGPLQIGQAVKKPRTVNMEDSWAGEEG	162600000	0	0	266458000	0	0	1	162600000	1	266458000	0.610228	nochange
Q8K0T4	Katnal1	464	Katnal1-464	ELQMPVTRGDLELALKKIAKSVSAADLEKYE	372720000	725900000	968800000	0	0	0	3	689140000	0	0	689140001	up
Q8K0T4	Katnal1	465	Katnal1-465	LQMPVTRGDLELALKKIAKSVSAADLEKYEK	372720000	725900000	968800000	0	0	0	3	689140000	0	0	689140001	up
Q8K4K6	Pank1	415	Pank1-415	LTGCETFEEALDMAAKGDSTNVDKLVKDIYG	0	0	0	0	0	0	1	0	0	0	1	nochange
Q8R2U7	Lrrc42	274	Lrrc42-274	KLNCLDISGTGLKDIKAVKDKLRANIGLVHS	164480000	0	0	0	0	0	1	164480000	0	0	164480001	up
Q8R2U7	Lrrc42	277	Lrrc42-277	CLDISGTGLKDIKAVKDKLRANIGLVHSKVP	164480000	0	0	0	0	0	1	164480000	0	0	164480001	up
Q8R2U7	Lrrc42	279	Lrrc42-279	DISGTGLKDIKAVKDKLRANIGLVHSKVPLK	164480000	0	0	0	0	0	1	164480000	0	0	164480001	up
Q923Q2	Stard13	831	Stard13-831	PSLFHLNLLKKESSPKVIQKKYATGKPDQKD	0	0	0	0	0	0	1	0	0	0	1	nochange
A2AKG8	Focad	1774	Focad-1774	EIPNKAFAAKSKDLLKATLLSLRVLPEFKKK	269360000	0	0	0	0	0	1	269360000	0	0	269360001	up
A2AL36	Cntrl	925	Cntrl-925	IQQLENEIHYLQENLKSMEKIQGLTDLQLQE	37280000	0	0	0	0	0	1	37280000	0	0	37280001	up
B2RQL2	Stox1	634	Stox1-634	KSWSTCDMFLGTKEKKQALPAQRCSLDPDSS	64485000	0	0	0	0	0	1	64485000	0	0	64485001	up
O35638	Stag2	33	Stag2-33	ETHFSSDTDFEDIEGKNQKQGKGKTCKKGKK	494200000	0	0	0	0	0	1	494200000	0	0	494200001	up
O35638	Stag2	36	Stag2-36	FSSDTDFEDIEGKNQKQGKGKTCKKGKKGPA	494200000	0	0	0	0	0	1	494200000	0	0	494200001	up
P04627	Araf	290	Araf-290	EQRERKSLADEKKKVKNLGYRDSGYYWEVPP	657940000	499770000	402490000	39915000	0	43320000	3	5.20067e+08	2	41617500	12.4963	up
P55302	Lrpap1	183	Lrpap1-183	SSEELDKLWREFLHYKEKIQEYNVLLDTLSR	13100000000	0	8158200000	0	0	0	2	10629100000	0	0	10629100001	up
P59055	Csrnp3	204	Csrnp3-204	LPTKKRRALLRASGVKKIDVDEKHELRAIRL	267250000	0	0	0	0	0	1	267250000	0	0	267250001	up
P59055	Csrnp3	205	Csrnp3-205	PTKKRRALLRASGVKKIDVDEKHELRAIRLS	267250000	0	0	0	0	0	1	267250000	0	0	267250001	up
P63154	Crnkl1	413	Crnkl1-413	QASLELIPHKKFTFAKMWLYYAQFEIRQKNL	507650000	0	0	0	0	0	1	507650000	0	0	507650001	up
P63154	Crnkl1	426	Crnkl1-426	FAKMWLYYAQFEIRQKNLPFARRALGTSIGK	507650000	0	0	0	0	0	1	507650000	0	0	507650001	up
P70670	Naca	1085	Naca-1085	KSASSPKRSPKTAGPKETPPGGVTAVPPEIS	246780000	0	0	0	0	0	1	246780000	0	0	246780001	up
Q02525	Zfp39	27	Zfp39-27	SLSQLPSRCLETRKRKRSYKKRPVTYSYWRR	213480000	0	0	0	0	0	1	213480000	0	0	213480001	up
Q2TBA3	Malt1	366	Malt1-366	KVALLIGNMSYWEHPKLKAPLVDVYELTNLL	161650000	109150000	0	0	0	0	2	135400000	0	0	135400001	up
Q3URK3	Tet1	1738	Tet1-1738	RLRFTEPVPRCGKRAKMKQNHNKSGSHNTKS	43378000	0	0	0	0	0	1	43378000	0	0	43378001	up
Q3URK3	Tet1	1740	Tet1-1740	RFTEPVPRCGKRAKMKQNHNKSGSHNTKSFS	43378000	0	0	0	0	0	1	43378000	0	0	43378001	up
Q6ZQJ5	Dna2	1023	Dna2-1023	RAKHKLILLGSVSSLKRFPPLGTLFDHLNAE	56333000	15850000	21728000	0	0	0	3	3.13037e+07	1	0	3.13037e+07	up
Q7TT52	Ppp1r14d	136	Ppp1r14d-136	PGNREPFISELLSQLKRLRRLSRPSK_____	0	0	0	0	0	0	1	0	1	0	1	nochange
Q8BTI9	Pik3cb	224	Pik3cb-224	SPNLNPIKINELAIQKRLTIRGKEDEASPCD	351300000	0	0	0	0	0	1	351300000	0	0	351300001	up
Q8BTI9	Pik3cb	231	Pik3cb-231	KINELAIQKRLTIRGKEDEASPCDYVLQVSG	351300000	0	0	0	0	0	1	351300000	0	0	351300001	up
Q8BYI8	Fam234b	423	Fam234b-423	QGLVLLRGQDLTPHWKLNLQGLRSQPTPGYF	0	0	0	0	0	0	1	0	0	0	1	nochange
Q8C0V1	Terb1	24	Terb1-24	TQEMKTDLKLLLECLKYHMGNPLSQKEVLIT	184380000	0	0	0	0	0	1	184380000	0	0	184380001	up
Q8CHY3	Dym	494	Dym-494	QYAAQRIISLFSLLSKKHNKVLEQATQSLRG	361410000	0	0	0	0	0	1	361410000	0	0	361410001	up
Q8CHY3	Dym	495	Dym-495	YAAQRIISLFSLLSKKHNKVLEQATQSLRGP	361410000	0	0	0	0	0	1	361410000	0	0	361410001	up
Q8CIG0	Depdc1a	747	Depdc1a-747	SQAAIAELLENIVRSKSLSLKEKRRKLKQKE	240980000	336020000	0	0	0	0	2	288500000	0	0	288500001	up
Q8K2I4	Manba	849	Manba-849	SIPGRFSDNGFLMIRKKLSVLFYPWKPTSKS	92631000	0	0	0	0	0	1	92631000	0	0	92631001	up
Q8K2I4	Manba	850	Manba-850	IPGRFSDNGFLMIRKKLSVLFYPWKPTSKSE	92631000	0	0	0	0	0	1	92631000	0	0	92631001	up
Q8VDD9	Phip	1590	Phip-1590	AKENMEKEKPVKRKMKSSVFSKASPLPKSAA	20139000	0	0	0	0	0	1	20139000	0	0	20139001	up
Q99LV7	Pigx	50	Pigx-50	VRATCSEIILRQEFLKDGFHRDLLIKVKFGE	350600000	0	0	0	23711000	0	1	350600000	1	23711000	14.7864	up
Q99NB8	Ubqln4	18	Ubqln4-18	EPSGAETRPQIRVTVKTPKDKEEIVICDQAS	21849000	0	0	0	0	0	1	21849000	0	0	21849001	up
Q99NB8	Ubqln4	21	Ubqln4-21	GAETRPQIRVTVKTPKDKEEIVICDQASVKE	21849000	0	0	0	0	0	1	21849000	0	0	21849001	up
Q9D0E1	Hnrnpm	387	Hnrnpm-387	NEILSNALKRGEIIAKQGGGGAGGSVPGIER	292600000	0	0	55604000	0	0	1	292600000	1	55604000	5.26221	up
Q9DBZ1	Ikbip	233	Ikbip-233	EEDLLRVEAQLSSDTKAVKKLEEEQHTLLAR	0	0	0	0	0	0	1	0	0	0	1	nochange
Q9QZH6	Ecsit	116	Ecsit-116	VRKRGHVDFIYLALRKMPEFGVERDLSVYNL	169560000	0	0	0	0	0	1	169560000	0	0	169560001	up
Q9WU62	Incenp	577	Incenp-577	RVEQMKEEKKKQIEQKFAQIDEKTEKAKEER	0	0	0	0	0	0	1	0	0	0	1	nochange
Q9WV89	Stxbp4	175	Stxbp4-175	TFPSCKAIQTKPEHDKTEHSPITSLDNSPAD	78492000	0	0	0	0	0	1	78492000	0	0	78492001	up
Q9Z2V6	Hdac5	175	Hdac5-175	NKEKSKESAIASTEVKLRLQEFLLSKSKEPT	134660000	0	0	0	0	0	1	134660000	0	0	134660001	up
P97360	Etv6	123	Etv6-123	PHSGDVLYELLQHILKQRKSRMLFSPFFPPG	64401000	84994000	0	0	0	0	2	74697500	0	0	74697501	up
Q45VK7	Dync2h1	1611	Dync2h1-1611	LKALILDIIHNIDIVKQLNQVQVHTTDDWAW	0	0	0	0	0	0	1	0	0	0	1	nochange
Q61602	Gli3	677	Gli3-677	SRSPGRPTQGAFGEQKELSNTTSKREECLQV	64946000	0	0	0	0	0	1	64946000	0	0	64946001	up
Q62000	Ogn	195	Ogn-195	LRLPVLPPKLTLLNAKHNKIKSKGIKANTFK	0	0	0	0	0	0	1	0	0	0	1	nochange
Q6A078	Cep290	1581	Cep290-1581	EIVKKHEEDLHVLHHKLEQQADNSLNKFRQT	135090000	374370000	0	0	0	0	2	254730000	0	0	254730001	up
Q8BYR2	Lats1	56	Lats1-56	LSKPSDASKAEHNLNKMSTEDPRQVRNPPKF	100030000	0	0	0	0	0	1	100030000	0	0	100030001	up
Q8R4E9	Cdt1	441	Cdt1-441	ALKGVSQALLERIRAKEVQKQLARMTRCPEQ	0	0	0	0	0	0	1	0	0	0	1	nochange
Q9D338	Mrpl19	259	Mrpl19-259	RFDLALTEEQMKEAQKWNKPWIEFDMMREYD	240960000	0	0	0	0	0	1	240960000	0	0	240960001	up
J3S6Y1	Tspear	406	Tspear-406	NFGPNERGQEFSVIYKWSPRKLKFTLYQRIA	15851000	17989000	0	0	0	0	2	16920000	0	0	16920001	up
O88987	Akap3	610	Akap3-610	VIFNFIRNLLSETIFKSSRNCESNVHEQNTQ	0	21307000	24463000	0	0	0	3	1.52567e+07	0	0	1.52567e+07	up
P17125	Tgfb3	160	Tgfb3-160	FRAEFRVLRVPNPSSKRTEQRIELFQILRPD	431774000	0	0	0	87664000	0	1	431774000	1	87664000	4.92533	up
P58802	Tbc1d10a	431	Tbc1d10a-431	AALLSSKAKPHKQAQKEQKRTKTSAQLDKSP	2233440000	4614630000	174740000	574740000	0	183440000	3	2.34094e+09	2	379090000	6.17515	up
Q3UYK3	Tbc1d9	1016	Tbc1d9-1016	RNYLKLWTAENKSKSKTAKDLPKLNQGQFIE	382240000	1654050000	0	0	0	0	2	1018145000	0	0	1018145001	up
Q6PF93	Pik3c3	600	Pik3c3-600	LSDVELIPLPLEPQVKIRGIIPETATLFKSA	46990000	0	0	44192000	0	46336000	2	23495000	2	45264000	0.519066	nochange
Q7M721	Tas2r120	209	Tas2r120-209	VLLLIYSLSKHLKNMKFYGKGCQDQSTMVHI	48261000	0	0	0	0	0	1	48261000	0	0	48261001	up
Q8CI12	Smtnl2	312	Smtnl2-312	VRSQTLPRTSGAQARKALFEKWEQDTASKGK	195090000	0	0	0	0	0	1	195090000	0	0	195090001	up
Q99J64	Rbm43	263	Rbm43-263	QDAQDGSCSGSVRHVKEFIEECAQEFHLELR	322750000	9844830000	8472720000	456490000	221907000	558335000	3	6.21343e+09	3	412244000	15.0722	up
Q9D1E6	Tbcb	203	Tbcb-203	KPGYWVGVRYDEPLGKNDGSVNGKRYFECQA	473260000	630460000	649950000	0	0	0	3	5.84557e+08	0	0	5.84557e+08	up
O54864	Suv39h1	52	Suv39h1-52	KKNLYDFEVEYLCDYKKIREQEYYLVKWRGY	6965400000	0	0	0	0	0	1	6965400000	0	0	6965400001	up
O54864	Suv39h1	53	Suv39h1-53	KNLYDFEVEYLCDYKKIREQEYYLVKWRGYP	6965400000	0	0	0	0	0	1	6965400000	0	0	6965400001	up
P61372	Isl1	81	Isl1-81	YCKRDYIRLYGIKCAKCSIGFSKNDFVMRAR	365770000	372830000	0	0	0	0	2	369300000	0	0	369300001	up
Q3U4B4	Lipn	335	Lipn-335	HYNQSYPPLYDLTAMKVPTAIWAGGHDVLVT	41011000	0	0	0	0	0	1	41011000	0	0	41011001	up
Q3UUE9	Ankub1	82	Ankub1-82	ISFCSTLKCFVKKEDKPTLYVFNAVTQEMMP	0	0	0	0	0	0	1	0	0	0	1	nochange
Q6A009	Ltn1	660	Ltn1-660	KPLEITKLAEKNPAVKFLYHKLIGWLNDSQK	0	0	0	0	0	0	1	0	0	0	1	nochange
Q8K1S3	Unc5b	809	Unc5b-809	FTLERHSLASTEFTCKVCVRQVEGEGQIFQL	14251000	0	0	0	0	0	1	14251000	0	0	14251001	up
Q8VDD9	Phip	921	Phip-921	KDGPTSPKKKKPKERKQKRLAVGELTENGLT	0	0	0	0	0	0	1	0	0	0	1	nochange
Q91WS2	Nlrp6	836	Nlrp6-836	VEPLCAALKHPKCSLKTLSLTSVELSENSLR	6791360000	10341390000	3744340000	5658868000	4540703000	4798156000	3	6959030000	3	4.99924e+09	1.39202	nochange
Q9JLK7	Cabp1	96	Cabp1-96	PEEIEELREAFREFDKDKDGYINCRDLGNCM	277640000	0	0	0	0	0	1	277640000	0	0	277640001	up
Q9WUM4	Coro1c	342	Coro1c-342	VNKCEIARFFKLHERKCEPIIMTVPRKSDLF	66661000	0	0	0	0	0	1	66661000	0	0	66661001	up
Q04859	Mak	33	Mak-33	VLMGKSNESGELVAIKRMKRKFYSWDECMNL	158000000	0	0	0	0	0	1	158000000	0	0	158000001	up
Q04859	Mak	36	Mak-36	GKSNESGELVAIKRMKRKFYSWDECMNLREV	158000000	0	0	0	0	0	1	158000000	0	0	158000001	up
Q8R5F8	Eps8l1	309	Eps8l1-309	TRRRAAGEGLLTLRAKPPTEAEYTDVLQKIK	131080000	162930000	0	81752000	0	0	2	147005000	1	81752000	1.79818	nochange
Q9WTZ2	Mbtps1	32	Mbtps1-32	GKRHLGDRLGTRALEKAPCPSCSHLTLKVEF	248820000	1034820000	397280000	0	0	0	3	5.60307e+08	0	0	5.60307e+08	up
A2A870	Fbf1	268	Fbf1-268	RKKTGDQEGPLPARSKLDELLGRGTAAKLLT	0	0	0	0	0	0	1	0	0	0	1	nochange
A2AQP0	Myh7b	354	Myh7b-354	MDILGFSVDEKCACYKIVGALLHFGNMKFKQ	862640000	0	0	331720000	0	11416000	1	862640000	2	171568000	5.02798	up
Q68FF6	Git1	700	Git1-700	EKIHLAVTEMASLFPKRPALEPVRSSLRLLN	0	0	0	0	0	0	1	0	0	0	1	nochange
Q80Y24	Prickle2	713	Prickle2-713	NALHLASEREVIARLKERPPLRAREDYDQFM	28214000	0	26390000	0	0	0	2	27302000	0	0	27302001	up
Q8R001	Mapre2	206	Mapre2-206	PKKSHHANSPTAGAAKSSPASKPGSTPSRPS	0	0	0	0	0	0	1	0	0	0	1	nochange
A2A4P0	Dhx8	892	Dhx8-892	YVVDPGFVKQKVYNSKTGIDQLVVTPISQAQ	106640000	0	0	0	0	0	1	106640000	0	0	106640001	up
E9Q3T6	Prdm14	410	Prdm14-410	CGKVFTYKYYRDKHLKYTPCVDKGDRKFPCS	0	0	0	0	0	0	1	0	0	0	1	nochange
G3UZ78	Adgb	537	Adgb-537	FTIPTETHFVQSVIKKGTPLGSSLPPLVEND	591390000	0	57391000	307850000	387880000	130430000	2	324390500	3	2.75387e+08	1.17795	nochange
O09113	Otp	125	Otp-125	RFTPAQLNELERSFAKTHYPDIFMREELALR	67213000	0	0	0	0	0	1	67213000	0	0	67213001	up
P09602	Hmgn2	64	Hmgn2-64	GEKVPKGKKGKADAGKDANNPAENGDAKTDQ	296480000	0	0	0	0	0	1	296480000	0	0	296480001	up
P20109	Il13	117	Il13-117	SSLPDTKIEVAHFITKLLSYTKQLFRHGPF_	4294100000	65121000	0	262620000	11963000	265950000	2	2179610500	3	1.80178e+08	12.097	up
P47743	Grm8	857	Grm8-857	IFHPEQNVQKRKRSFKAVVTAATMQSKLIQK	0	0	0	0	0	0	1	0	0	0	1	nochange
P55302	Lrpap1	174	Lrpap1-174	HKAKTSGKFSSEELDKLWREFLHYKEKIQEY	13100000000	0	8158200000	0	0	0	2	10629100000	0	0	10629100001	up
P97481	Epas1	117	Epas1-117	VTQDGDMIFLSENISKFMGLTQVELTGHSIF	0	0	0	0	0	0	1	0	0	0	1	nochange
Q3UJV1	Ccdc61	268	Ccdc61-268	LEEVKASERNLRARLKTLNSELAMYRRGRRT	50894000	0	0	0	0	0	1	50894000	0	0	50894001	up
Q6PGL7	Washc2	1239	Washc2-1239	THDIFEDDIFATEAIKPFPKKREKGRTLEPN	511830000	0	0	0	0	0	1	511830000	0	0	511830001	up
Q8C0V1	Terb1	17	Terb1-17	ESEKPKKTQEMKTDLKLLLECLKYHMGNPLS	184380000	0	0	0	0	0	1	184380000	0	0	184380001	up
Q8C170	Myo9a	1474	Myo9a-1474	ILKTTLTQDINREARKCQFSGDQMTPLNTDS	119050000	0	0	0	0	0	1	119050000	0	0	119050001	up
Q8R071	Itpka	197	Itpka-197	KRYSWVQLAGHTGSFKAAGTSGLILKRSSEP	10800000000	639690000	0	0	0	0	2	5719845000	0	0	5719845001	up
Q8R0F9	Sec14l4	196	Sec14l4-196	NYPETVKNLIIIRAPKLFPVAFNLVKSFMGE	0	0	0	0	0	0	1	0	0	0	1	nochange
Q91YR7	Prpf6	737	Prpf6-737	GELMEKAREAYNQGLKKCPHSTPLWLLLSRL	521570000	0	0	0	0	0	1	521570000	0	0	521570001	up
Q99104	Myo5a	514	Myo5a-514	IESKLGILDLLDEECKMPKGTDDTWAQKLYN	6499300000	2639600000	0	0	0	0	2	4569450000	0	0	4569450001	up
Q99JT1	Gatb	413	Gatb-413	LLNEVGLLEFFQNVIKETRTEPKKVTNWVLN	0	0	0	0	0	0	1	0	0	0	1	nochange
Q9CR40	Klhl28	232	Klhl28-232	LAQLLNSVRLPLLSVKFLTRLYEANHLIRDD	71273000	0	0	0	0	0	1	71273000	0	0	71273001	up
Q9EPQ8	Tcf20	1542	Tcf20-1542	PVGILAPEANPKAEEKENDTVMISPKQESFP	24956000	0	0	0	0	0	1	24956000	0	0	24956001	up
Q9JK23	Psmg1	71	Psmg1-71	ETSLEAVLLETHPCSKFIIAVGSNATAFLSA	1111800000	128480000	0	0	0	0	2	620140000	0	0	620140001	up
Q9Z183	Padi4	603	Padi4-603	NMVNMLVLGKYLGIPKPFGPIIDGHCCLEEE	165550000	1740000000	0	102810000	0	0	2	952775000	1	102810000	9.26734	up
Q9Z2V6	Hdac5	185	Hdac5-185	ASTEVKLRLQEFLLSKSKEPTPGGLNHSLPQ	134660000	0	0	0	0	0	1	134660000	0	0	134660001	up
A2A6T1	Cdr2l	258	Cdr2l-258	RVQELEAELLELQQMKQAKTYLLAREEHLAE	1040700000	0	0	0	0	0	2	520350000	0	0	520350001	up
E9Q401	Ryr2	4600	Ryr2-4600	CIIGYYCLKVPLVIFKREKEVARKLEFDGLY	0	0	13738000	5051300	3922900	2774800	2	6869000	3	3.91633e+06	1.75394	nochange
Q9QZR5	Hipk2	514	Hipk2-514	EFIDLLKKMLTIDADKRVTPIETLNHPFVTM	23367000	0	0	0	0	0	1	23367000	0	0	23367001	up
P61407	Tdrd6	1699	Tdrd6-1699	IVELRSKGENINEKMKKYAKTGVPKNDLSSE	1473350000	222460000	2787911000	0	0	0	3	1.49457e+09	0	0	1.49457e+09	up
P70677	Casp3	224	Casp3-224	SKDGSWFIQSLCSMLKLYAHKLEFMHILTRV	187573000	0	0	8834700	0	0	1	187573000	1	8834700	21.2314	up
Q03385	Ralgds	753	Ralgds-753	CIIRVSLDVDNGNMYKSILVTSQDKAPTVIR	381170000	795970000	0	0	0	0	2	588570000	0	0	588570001	up
Q03385	Ralgds	762	Ralgds-762	DNGNMYKSILVTSQDKAPTVIRKAMDKHNLD	381170000	795970000	0	0	0	0	2	588570000	0	0	588570001	up
Q2XU92	Acsbg2	95	Acsbg2-95	SQYYEMCRKAAKSLIKLGLQRFQCVGILGFN	128430000	0	141930000	0	0	0	2	135180000	0	0	135180001	up
Q60610	Tiam1	1388	Tiam1-1388	FHLCCSSPESRKDFLKSVHSILRDKHRRQLL	67486000	229890000	0	0	0	0	2	148688000	0	0	148688001	up
Q60936	Coq8a	641	Coq8a-641	CKAMFEEAYSNYCRMKSGLQ___________	0	7951000	0	0	0	0	2	3975500	0	0	3975501	up
Q63ZW7	Patj	1263	Patj-1263	LEKDKNGLGLSLAGNKDRSRMSIFVVGINPE	33919000	7081700	0	0	0	0	2	20500350	0	0	20500351	up
Q80U30	Clec16a	803	Clec16a-803	AKQRLAKGRIQARRMKMQRIAALLDLPIQPT	127360000	0	241470000	0	0	0	2	184415000	0	0	184415001	up
Q80VA5	Sh3tc2	59	Sh3tc2-59	LPQNMTQDLVLSFCVKSRSRRCVNAALQEAA	0	54985000	0	0	0	788460	2	27492500	1	788460	34.8686	up
Q8BG39	Sv2b	309	Sv2b-309	LKFMPESPRFLLEMGKHDEAWMILKQVHDTN	3770000000	129100000	0	0	20379000	71278000	2	1949550000	2	45828500	42.5401	up
Q8CBC4	Cnst	705	Cnst-705	VDFYYTKLLQGVAGLKHWVYLS_________	46086000	0	0	0	0	0	2	23043000	0	0	23043001	up
Q8K4E0	Alms1	2765	Alms1-2765	RGGHRAREWTGRRQQKQKGKQHRKWSKSLER	222320000	0	0	0	0	0	1	222320000	0	0	222320001	up
Q8R1F6	Hid1	468	Hid1-468	VFTGTHADLLIVVFHKIITSGHQRLQPLFDC	907310000	824810000	942030000	36023000	12528000	115230000	3	8.91383e+08	3	5.45937e+07	16.3276	up
Q8VBT0	Tmx1	213	Tmx1-213	CMIFVADCLCPSKRRKPQQQYAKKTSPEFSQ	328220000	0	0	0	0	0	2	164110000	1	0	164110001	up
Q8VD46	Asz1	213	Asz1-213	ILKLLELGANKMLQTKDGRTPSEIAKRNKHL	47836000	88231000	0	0	0	0	2	68033500	0	0	68033501	up
Q91W10	Slc39a8	118	Slc39a8-118	AILQQLNFHPCEDLRKHNAKPSLSEVWGYGF	55980000	0	0	0	0	0	1	55980000	0	0	55980001	up
Q91W64	Cyp2c70	158	Cyp2c70-158	DRIQEEILYMLDALRKTNGSPCDPSFLLACV	600820000	1977440000	2300870000	270240000	155720000	0	3	1.62638e+09	2	212980000	7.63629	up
Q9ERM2	Icam4	124	Icam4-124	CAGETREATARITAYKRPRSVILEPPVLVGH	0	0	0	0	0	0	1	0	0	0	1	nochange
Q9WUM3	Coro1b	447	Coro1b-447	TDVPSGNLAGAGEAGKLEEVMQELRALRMLV	0	0	0	0	52725000	0	1	0	1	52725000	1.89663e-08	down
A2ASS6	Ttn	13219	Ttn-13219	SFDAEISEEDIPGEWKLKGELLRPSPTCEIK	2417400000	0	0	0	0	0	1	2417400000	0	0	2417400001	up
A2RT67	Dennd3	819	Dennd3-819	VYKLSSSVKTNRGVGKIAMTQKRLFLLTEGR	25431000	0	49993000	0	0	0	2	37712000	0	0	37712001	up
Q8CHZ9	Mterf1a	173	Mterf1a-173	LENNIKFLCSVGLTHKCLCRLLTNAPRTFSN	295120000	906350000	1114080000	360356000	0	0	3	771850000	1	360356000	2.14191	up
P09066	En2	286	En2-286	ELSLNESQIKIWFQNKRAKIKKATGNKNTLA	0	0	0	0	0	0	1	0	0	0	1	nochange
P58802	Tbc1d10a	427	Tbc1d10a-427	LPPDAALLSSKAKPHKQAQKEQKRTKTSAQL	2233440000	4614630000	174740000	574740000	0	183440000	3	2.34094e+09	2	379090000	6.17515	up
Q91Z83	Myh7	1499	Myh7-1499	LKNAYEESLEHLETFKRENKNLQEEISDLTE	20480000	88260000	0	0	0	0	2	54370000	0	0	54370001	up
Q91Z83	Myh7	1503	Myh7-1503	YEESLEHLETFKRENKNLQEEISDLTEQLGS	20480000	88260000	0	0	0	0	2	54370000	0	0	54370001	up
Q03059	Chat	256	Chat-256	PPIGLLTSDGRSEWAKARTVLLKDSTNRDSL	153120000	0	0	0	0	0	1	153120000	0	0	153120001	up
Q03059	Chat	263	Chat-263	SDGRSEWAKARTVLLKDSTNRDSLDMIERCI	153120000	0	0	0	0	0	1	153120000	0	0	153120001	up
Q03146	Ddr1	24	Ddr1-24	LLLLLLLVTIGDADMKGHFDPAKCRYALGMQ	29621000	0	0	0	0	0	1	29621000	0	0	29621001	up
Q4FZC9	Syne3	147	Syne3-147	MVVALEPPVELQLGLKEKQWQLSHAQVLLHN	111460000	0	0	0	0	0	1	111460000	0	0	111460001	up
Q5S006	Lrrk2	1601	Lrrk2-1601	QDPALQLSDLYFVEPKWLCKVMAQILTVKVD	208770000	0	0	0	0	0	1	208770000	0	0	208770001	up
Q69Z66	Mysm1	153	Mysm1-153	TKIATLLKSRTVLQVKSYARQYFKNKVKWDV	83993000	0	79918000	0	0	0	2	81955500	0	0	81955501	up
Q6P9R2	Oxsr1	303	Oxsr1-303	HKFFQKAKNKEFLQEKILQRAPTISERSKKV	0	0	0	0	0	0	1	0	0	0	1	nochange
Q7M721	Tas2r120	206	Tas2r120-206	LNCVLLLIYSLSKHLKNMKFYGKGCQDQSTM	48261000	0	0	0	0	0	1	48261000	0	0	48261001	up
Q8BG39	Sv2b	341	Sv2b-341	RAKGTPEKVFTVSHIKTPKQMDEFIEIQSST	314630000	361110000	469750000	29946000	0	0	3	381830000	1	29946000	12.7506	up
Q8BP31	Rnf122	80	Rnf122-80	NQAQSERYGYKEVVLKGDAKKLQLYGQTCAV	102870000	0	0	0	0	0	2	51435000	0	0	51435001	up
Q8C0Q4	Nek11	59	Nek11-59	VYLVSDKKAKPGEELKVLKEISVGELNPNET	261850000	0	160450000	41352000	0	0	2	211150000	1	41352000	5.10616	up
Q9ER47	Kcnh7	356	Kcnh7-356	DVKTEKKNTSPPSSDKTIIAPKVKERTHNVT	622370000	0	1897500000	0	0	0	2	1259935000	0	0	1259935001	up
Q9ESE1	Lrba	136	Lrba-136	SIRNLQVCTEVGLVEKVLGKIEKVDSMIADL	281550000	0	0	166170000	0	0	1	281550000	1	166170000	1.69435	nochange
Q9ESE1	Lrba	140	Lrba-140	LQVCTEVGLVEKVLGKIEKVDSMIADLLVDM	281550000	0	0	166170000	0	0	1	281550000	1	166170000	1.69435	nochange
Q9JKF1	Iqgap1	811	Iqgap1-811	QDRLAYLHSHKDEVVKIQSLARMHQARKRYR	98644000	94331000	149560000	0	0	0	3	1.14178e+08	0	0	1.14178e+08	up
B2KF05	Brpf3	549	Brpf3-549	QREQDEKTSAVKEELKYWQKLRHDLERARLL	143330000	0	0	0	0	0	1	143330000	0	0	143330001	up
E9PV86	Mctp1	382	Mctp1-382	DHDLGIILLSVILTPKEGEHRDVTMLMRKSW	0	0	0	0	0	0	1	0	0	0	1	nochange
O35385	Ppef2	306	Ppef2-306	LHGGVSDKTDLELLAKLDRHKIVSTMRCKTR	26689000	0	0	0	0	0	1	26689000	0	0	26689001	up
P08003	Pdia4	204	Pdia4-204	IILVEFYAPWCGHCKKLAPEYEKAAKELSKR	13197000	0	0	0	0	0	1	13197000	0	0	13197001	up
P14152	Mdh1	214	Mdh1-214	KVKLQGKEVGVYEALKDDSWLKGEFITTVQQ	0	0	0	0	0	0	1	0	0	0	1	nochange
Q61625	Grid2	340	Grid2-340	LYIYDTVLLLANAFHKKLEDRKWHSMASLSC	559350000	0	91687000	134202000	0	0	2	325518500	1	134202000	2.42559	up
Q62092	Nsg1	3	Nsg1-3	_____________MVKLGNNFAEKGTKQPLL	0	0	0	0	0	0	1	0	0	0	1	nochange
Q6A009	Ltn1	655	Ltn1-655	NVVKAKPLEITKLAEKNPAVKFLYHKLIGWL	0	0	0	0	0	0	1	0	0	0	1	nochange
Q6P2L7	Golm2	192	Golm2-192	EENIKKLADQFLQEQKETHKIQSNDGKELGR	29876000	0	0	0	0	0	1	29876000	0	0	29876001	up
Q6P9Q4	Fhod1	1032	Fhod1-1032	LEYRTCRERVLQQQQKRATYRERNKTRGRMI	145490000	0	0	0	0	0	1	145490000	0	0	145490001	up
Q7TPZ8	Cpa1	2	Cpa1-2	______________MKRLLVLSVLLAAVFGN	0	0	0	0	0	0	1	0	0	0	1	nochange
Q80Y73	Hoatz	133	Hoatz-133	EILQLLRKQREERISKELISLPYKPKDKVPK	131710000	0	0	0	0	0	1	131710000	0	0	131710001	up
Q8BMD7	Morc4	478	Morc4-478	VPEEQERIDEDLHRSKAKQQVEAAEKKQKPM	146990000	0	0	0	0	0	1	146990000	0	0	146990001	up
Q8BND3	Wdr35	458	Wdr35-458	AASKEAFYTWQYRVAKKLTALEINQITRSRK	540660000	0	0	0	0	208670000	1	540660000	1	208670000	2.59098	up
Q8BND3	Wdr35	459	Wdr35-459	ASKEAFYTWQYRVAKKLTALEINQITRSRKE	540660000	0	0	0	0	208670000	1	540660000	1	208670000	2.59098	up
Q8BYH3	Trmt13	227	Trmt13-227	FILVERVTTRFKVDGKHRKKDSVFERLQIDI	35339000	0	0	0	0	0	1	35339000	0	0	35339001	up
Q8K224	Nat10	1019	Nat10-1019	QSKKLKKRDNNRKDMKLKRKK__________	108280000	0	0	0	0	0	1	108280000	0	0	108280001	up
Q8R4E6	Purg	72	Purg-72	TSEIQELASKRVDIQKKRFYLDVKQSSRGRF	0	0	0	0	0	0	1	0	0	0	1	nochange
Q8R4E6	Purg	73	Purg-73	SEIQELASKRVDIQKKRFYLDVKQSSRGRFL	0	0	0	0	0	0	1	0	0	0	1	nochange
Q8R4U6	Top1mt	74	Top1mt-74	AYEPLPDGVHFLYDGKPLKLSLAAEEVATFY	74493000	38204000	0	0	0	0	2	56348500	0	0	56348501	up
Q8R4U6	Top1mt	77	Top1mt-77	PLPDGVHFLYDGKPLKLSLAAEEVATFYGKM	74493000	38204000	0	0	0	0	2	56348500	0	0	56348501	up
Q8VCD5	Med17	196	Med17-196	FNSELLRLRQHWKLRKVGDKILGDLSYRSAG	0	0	0	0	0	0	2	0	0	0	1	nochange
Q8VCD5	Med17	200	Med17-200	LLRLRQHWKLRKVGDKILGDLSYRSAGSLFP	0	0	0	0	0	0	2	0	0	0	1	nochange
Q91X20	Ash2l	183	Ash2l-183	LANLTWQSRTQDEHPKTMFSKDKDIIPFIDK	138871000	0	0	0	0	0	1	138871000	0	0	138871001	up
Q9D074	Mgrn1	331	Mgrn1-331	CRLPFRALLQIRAVRKKPGALSPISFSPVLA	161440000	354440000	0	89555000	85840000	147120000	2	257940000	3	107505000	2.39933	up
Q9D074	Mgrn1	332	Mgrn1-332	RLPFRALLQIRAVRKKPGALSPISFSPVLAQ	161440000	354440000	0	89555000	85840000	147120000	2	257940000	3	107505000	2.39933	up
Q9EPW0	Inpp4a	381	Inpp4a-381	HCQGFKSGGLRKKLHKFEEAKKHSFEECCTS	823430000	0	0	0	0	0	1	823430000	0	0	823430001	up
Q9QXD6	Fbp1	202	Fbp1-202	LDPSIGEFIMVDRDVKMKKKGNIYSLNEGYA	58267000	0	0	0	0	0	1	58267000	0	0	58267001	up
Q9QXD6	Fbp1	204	Fbp1-204	PSIGEFIMVDRDVKMKKKGNIYSLNEGYAKD	58267000	0	0	0	0	0	1	58267000	0	0	58267001	up
Q9QXD6	Fbp1	205	Fbp1-205	SIGEFIMVDRDVKMKKKGNIYSLNEGYAKDF	58267000	0	0	0	0	0	1	58267000	0	0	58267001	up
Q9WU79	Prodh	367	Prodh-367	EQQMKRMLQRMDVLAKKAKEAGVRLMIDAEQ	0	0	0	0	0	0	1	0	0	0	1	nochange
P11033	Gzmd	98	Gzmd-98	NITAKEETQQIIPVAKDIPHPDYNATIFYSD	56984000	0	0	0	0	0	1	56984000	0	0	56984001	up
P63137	Gabrb2	237	Gabrb2-237	VVFSTGSYPRLSLSFKLKRNIGYFILQTYMP	16896000	29536000	14138000	0	0	0	3	20190000	0	0	20190001	up
P70388	Rad50	425	Rad50-425	TASQLLSDLTDKEALKQRQLDELRDRKSGLG	11512000	38809000	0	0	0	0	2	25160500	0	0	25160501	up
Q04690	Nf1	2018	Nf1-2018	GQITDLLDVVLDSFIKTSATGGLGSIKAEVM	0	0	0	195017000	0	0	1	0	1	195017000	5.12776e-09	down
Q3TWI9	Tmem63b	229	Tmem63b-229	LYLLLTVYSMRRHTSKMRYKEDDLVKRTLFI	84868000	0	0	0	0	0	1	84868000	0	0	84868001	up
Q5DTW7	Resf1	1151	Resf1-1151	SSVQSVSPEKKKLKFKAGGSRLKYFEKRKTD	370130000	0	0	0	0	125630000	1	370130000	1	125630000	2.94619	up
Q5I012	Slc38a10	675	Slc38a10-675	EKKEAEQQGGDQAGSKLEAEIKKLVAEAGRA	148520000	0	0	0	0	0	1	148520000	0	0	148520001	up
Q6P4T0	Atg2a	1051	Atg2a-1051	PHKNVKEFLVTVRLHKATLRHYMAPPEQSWH	170700000	0	0	0	0	0	1	170700000	1	0	170700001	up
Q6P5G0	Mapk4	253	Mapk4-253	MQLILDTIPVVREEDKEELLRVMPSFVSSTW	23394000	0	0	0	0	0	1	23394000	0	0	23394001	up
Q6ZPY2	Smg5	95	Smg5-95	ELLWRKVYYEVIQLIKTNKKHIHSRSTLECA	35038000	12509000	43791000	0	0	0	3	30446000	0	0	30446001	up
Q6ZPY2	Smg5	98	Smg5-98	WRKVYYEVIQLIKTNKKHIHSRSTLECAYRT	35038000	12509000	43791000	0	0	0	3	30446000	0	0	30446001	up
Q80XJ3	Ttc28	118	Ttc28-118	HKALDDAIKARLLNPKWPKAYFRQGVALQYL	142900000	0	0	0	0	0	1	142900000	0	0	142900001	up
Q8BG60	Txnip	168	Txnip-168	NTPDLMAPVSAKKEKKVSCMFIPDGRVSVSA	30063000	0	0	0	0	0	1	30063000	0	0	30063001	up
Q8BGA5	Krr1	153	Krr1-153	DVACDIIKIGSLVRNKERFVKRRQRLIGPKG	0	0	0	0	0	0	1	0	0	0	1	nochange
Q8CE72	Cplane1	188	Cplane1-188	PSTKDKEAVVAAVFVKNELLGDCCLCSFTFY	31970000	0	0	0	0	0	1	31970000	0	0	31970001	up
Q8K2Y7	Mrpl47	43	Mrpl47-43	DAAHSGCRSSLSLLHKNTPHVTSFLQCKLLH	0	0	0	0	0	0	2	0	0	0	1	nochange
Q8WTY4	Ciapin1	185	Ciapin1-185	SSSQLKLPNKKSSSVKPVVDPAAAKLWTLSA	29175000	0	0	0	0	0	1	29175000	0	0	29175001	up
Q9DBE9	Ftsj3	795	Ftsj3-795	AGLGKEKRQVTYVVAKKGVGRKVRRPAGVKG	24048000	0	0	0	0	0	1	24048000	0	0	24048001	up
Q9DBE9	Ftsj3	796	Ftsj3-796	GLGKEKRQVTYVVAKKGVGRKVRRPAGVKGH	24048000	0	0	0	0	0	1	24048000	0	0	24048001	up
B2RX14	Tut4	1197	Tut4-1197	FDKTEELKKRLPSLGKNTESLGELWLGLLRF	33923000	133390000	190927000	20245000	0	0	3	1.19413e+08	1	20245000	5.89841	up
O54940	Bnip2	219	Bnip2-219	ENYMIIYLNGATTRRKMPSLGWLRRCYQQID	0	595490000	0	114800000	197030000	99850000	2	297745000	3	1.37227e+08	2.16973	up
P35436	Grin2a	1185	Grin2a-1185	NPLHNEDGLPNNDQYKLYAKHFTLKDKGSPH	2073300000	0	0	0	0	0	2	1036650000	0	0	1036650001	up
Q9JIW9	Ralb	47	Ralb-47	LQFMYDEFVEDYEPTKADSYRKKVVLDGEEV	995260000	1187130000	738840000	0	0	0	3	9.73743e+08	1	0	9.73743e+08	up
P97789	Xrn1	1035	Xrn1-1035	NENGAEKVQEIITWLKGHPVSTLSRSSCDLH	824280000	499160000	116920000	0	0	0	3	480120000	0	0	480120001	up
Q3UG61	Mrgprb1	304	Mrgprb1-304	IYFLVGSIRHHRFQRKTLKLLLQRAMQDSPE	13488000	8983100	0	0	0	0	2	11235550	0	0	11235551	up
Q3UG61	Mrgprb1	307	Mrgprb1-307	LVGSIRHHRFQRKTLKLLLQRAMQDSPEEEE	13488000	8983100	0	0	0	0	2	11235550	0	0	11235551	up
Q3UKC1	Tax1bp1	563	Tax1bp1-563	QDEKTKCNKYAEELAKMELKWKEQVKIAENV	46171000	0	0	0	0	0	1	46171000	0	0	46171001	up
Q61211	Eif2d	400	Eif2d-400	SGHKKGSTLEGSEVRKIITDYAKRNRLVDAD	54284000	0	0	0	0	0	1	54284000	0	0	54284001	up
Q61699	Hsph1	126	Hsph1-126	FFSVEQITAMLLTKLKETAENNLKKPVTDCV	536030000	999870000	1440480000	131600000	0	0	3	9.92127e+08	1	131600000	7.53896	up
Q69Z37	Samd9l	901	Samd9l-901	NFDTTYIKNVVKNTLKDLDAKSRRAQLISYL	130610000	0	0	0	0	0	1	130610000	0	0	130610001	up
Q6DID3	Scaf8	25	Scaf8-25	ELYSLNDYKPPISKAKMTQITKAAIKAIKFY	0	51583000	0	0	0	0	2	25791500	0	0	25791501	up
Q80XA6	Reps2	390	Reps2-390	SMPANQQSCDLNRMEKTSVKDVADFPVPTQD	1005900000	0	0	0	0	0	1	1005900000	0	0	1005900001	up
Q80Y81	Elac2	242	Elac2-242	KAWGRDPSLVVAFVCKLHLRKGNFLVLKAKE	90210000	0	120210000	0	0	0	2	105210000	0	0	105210001	up
Q8BIK4	Dock9	573	Dock9-573	IYRQDSNKLSNDDMLKLLADFRKPEKMAKLP	113990000	0	0	0	0	0	1	113990000	0	0	113990001	up
Q8CCJ3	Ufl1	784	Ufl1-784	KELQELSLSIKDLVLKSRKSSVTEE______	863310000	922335000	0	0	0	0	2	892822500	0	0	892822501	up
Q8CIX8	Lgsn	542	Lgsn-542	KQALGETFIRYFVAMKKYELENEETDAEGNK	207800000	0	0	0	0	95605000	1	207800000	1	95605000	2.17353	up
Q8CIX8	Lgsn	543	Lgsn-543	QALGETFIRYFVAMKKYELENEETDAEGNKF	207800000	0	0	0	0	95605000	1	207800000	1	95605000	2.17353	up
Q8R4P4	Tmc2	155	Tmc2-155	EQVEEKKKLITTVRNKPWPMAKKLRELREAQ	98674000	0	0	0	0	0	1	98674000	0	0	98674001	up
Q91W86	Vps11	168	Vps11-168	NFMAIGFTDGSVTLNKGDITRDRHSKTQILH	0	0	0	0	0	0	1	0	0	0	1	nochange
Q9D9Z1	Knstrn	262	Knstrn-262	LETLKDELKVFNETAKKQMEELQALKVKLKL	0	0	0	2783300	0	6880800	1	0	2	4832050	2.06951e-07	down
Q9DCR2	Ap3s1	115	Ap3s1-115	CFENVCELDLIFHVDKVHNILAEMVMGGMVL	2060000000	2793757000	0	0	0	0	2	2426878500	0	0	2426878501	up
A2A4P0	Dhx8	887	Dhx8-887	IDGIYYVVDPGFVKQKVYNSKTGIDQLVVTP	106640000	0	0	0	0	0	1	106640000	0	0	106640001	up
E9Q2M9	Wdfy4	67	Wdfy4-67	LDYQQLMPRNPEERRKNLLSLLPLFLKAWEH	387350000	0	157460000	0	0	0	3	1.81603e+08	0	0	1.81603e+08	up
E9Q2M9	Wdfy4	78	Wdfy4-78	EERRKNLLSLLPLFLKAWEHSVGIICFRSLQ	387350000	0	157460000	0	0	0	3	1.81603e+08	0	0	1.81603e+08	up
P37237	Fgf8	198	Fgf8-198	TEIVLENNYTALQNAKYEGWYMAFTRKGRPR	45422000	0	0	0	0	0	1	45422000	0	0	45422001	up
P59384	Adamts15	753	Adamts15-753	NGHFVVSAVERDLVVKGSVLRYSGTGTAVES	233580000	0	0	0	0	0	1	233580000	0	0	233580001	up
P63154	Crnkl1	408	Crnkl1-408	TRQVYQASLELIPHKKFTFAKMWLYYAQFEI	507650000	0	0	0	0	0	1	507650000	0	0	507650001	up
P70670	Naca	1076	Naca-1076	TSKSATPGEKSASSPKRSPKTAGPKETPPGG	246780000	0	0	0	0	0	1	246780000	0	0	246780001	up
P70670	Naca	1080	Naca-1080	ATPGEKSASSPKRSPKTAGPKETPPGGVTAV	246780000	0	0	0	0	0	1	246780000	0	0	246780001	up
Q91Z83	Myh7	939	Myh7-939	ERLEDEEEMNAELTAKKRKLEDECSELKRDI	190750000	0	0	0	0	0	1	190750000	0	0	190750001	up
Q91Z83	Myh7	940	Myh7-940	RLEDEEEMNAELTAKKRKLEDECSELKRDID	190750000	0	0	0	0	0	1	190750000	0	0	190750001	up
Q91Z83	Myh7	942	Myh7-942	EDEEEMNAELTAKKRKLEDECSELKRDIDDL	190750000	0	0	0	0	0	1	190750000	0	0	190750001	up
Q14B71	Cdca2	201	Cdca2-201	LLEYQQSGFPVNSSSKRRRISSQDSPDNYLS	0	0	0	0	0	0	1	0	0	0	1	nochange
Q5DU37	Zfyve26	2310	Zfyve26-2310	ETSRSSGRKKATFFRKKMTAADVSRHMNTLQ	22922000	0	0	0	0	0	1	22922000	0	0	22922001	up
Q61503	Nt5e	229	Nt5e-229	VNKIIALGHSGFEMDKLIAQKVRGVDIVVGG	50287000	198610000	133120000	0	0	0	3	127339000	0	0	127339001	up
Q6R653	Unc5cl	245	Unc5cl-245	LYTCVLEAPLGQTARKWLQLAMFCSPLVPGQ	12757000	0	0	0	0	0	1	12757000	0	0	12757001	up
Q6RT24	Cenpe	2010	Cenpe-2010	NQRCSLEFHRALKRLKYVLSSIARIKEEQHE	131150000	0	0	0	0	0	1	131150000	0	0	131150001	up
Q6RT24	Cenpe	2020	Cenpe-2020	ALKRLKYVLSSIARIKEEQHESINKREMAFI	131150000	0	0	0	0	0	1	131150000	0	0	131150001	up
Q6ZPR1	Cfap97	323	Cfap97-323	LKNDSRCVKSAKRKEKHGQSFAPKSSVLDAN	0	340490000	0	0	0	0	2	170245000	0	0	170245001	up
Q6ZPR1	Cfap97	331	Cfap97-331	KSAKRKEKHGQSFAPKSSVLDANLDRRSKQK	0	340490000	0	0	0	0	2	170245000	0	0	170245001	up
Q80WC1	Ubn2	316	Ubn2-316	KKRYKDSLSLAAMIRKFQKEKDALKKESTPK	0	0	616980000	0	0	0	3	205660000	0	0	205660001	up
Q80WC1	Ubn2	319	Ubn2-319	YKDSLSLAAMIRKFQKEKDALKKESTPKVPV	0	0	616980000	0	0	0	3	205660000	0	0	205660001	up
Q8BGC0	Htatsf1	57	Htatsf1-57	LGQPPDDTPYEWDLDKKAWFPKITEDFIATY	142490000	0	0	0	0	0	1	142490000	0	0	142490001	up
Q8BGC0	Htatsf1	58	Htatsf1-58	GQPPDDTPYEWDLDKKAWFPKITEDFIATYQ	142490000	0	0	0	0	0	1	142490000	0	0	142490001	up
Q8BGE5	Fancm	447	Fancm-447	HPKLKKLEEVILEHFKSWNAKATTEKKCHES	218270000	0	0	0	0	0	1	218270000	0	0	218270001	up
Q8BPM2	Map4k5	293	Map4k5-293	GQPGLSRALAVELLDKVSNPDNHAPYSEGDE	74747000	0	0	0	0	0	1	74747000	0	0	74747001	up
Q8K561	Otoa	370	Otoa-370	KCSRLRGFQAGVQKLKANLLDIATENQTLNE	31689000	0	0	0	0	0	1	31689000	0	0	31689001	up
Q8R071	Itpka	182	Itpka-182	KIRTMVNLPVMSPFRKRYSWVQLAGHTGSFK	10800000000	639690000	0	0	0	0	2	5719845000	0	0	5719845001	up
Q8VC12	Uroc1	618	Uroc1-618	GGFGLVLDGTAEAEQKARMMLSWDVSNGVAR	203200000	0	0	0	0	0	1	203200000	0	0	203200001	up
Q8VDJ3	Hdlbp	711	Hdlbp-711	GSDTVVIRGPSSDVEKAKKQLLHLAEEKQTK	2187300000	0	174070000	0	0	0	2	1180685000	0	0	1180685001	up
Q99LB0	Dnttip1	200	Dnttip1-200	VWKQKSCEPIRREGPKWDPARLNESTTFVLG	186460000	0	0	0	0	0	1	186460000	0	0	186460001	up
Q9CRT8	Xpot	635	Xpot-635	DLLTPLMERFKVLLEKLMMAQDEERQASLAD	190550000	0	0	0	0	0	1	190550000	0	0	190550001	up
Q9D8U8	Snx5	328	Snx5-328	TKALIDYENSNKALDKARLKSKDVKLAETHQ	10488000	0	0	0	0	0	1	10488000	0	0	10488001	up
Q9D8U8	Snx5	332	Snx5-332	IDYENSNKALDKARLKSKDVKLAETHQQECC	10488000	0	0	0	0	0	1	10488000	0	0	10488001	up
Q9DA97	Septin14	180	Septin14-180	TPTGHSLKSLDLLTMKSIDRRVNIIPLIAKA	121650000	522190000	359760000	0	47216000	36732000	3	3.34533e+08	2	41974000	7.97001	up
Q9QY01	Ulk2	39	Ulk2-39	FRGRHRQKTDWEVAIKSINKKNLSKSQILLG	45834000	69215000	0	0	0	0	2	57524500	0	0	57524501	up
Q9WVA3	Bub3	80	Bub3-80	YDPTHAWSGGLDHQLKMHDLNTDQENLVGTH	122840000	0	0	0	0	0	1	122840000	0	0	122840001	up
A2AMT1	Bfsp1	390	Bfsp1-390	IAQDKVEETLEDAPLKPPQEPKALQVERKAE	0	20964000	0	0	0	0	1	20964000	0	0	20964001	up
A2AMT1	Bfsp1	396	Bfsp1-396	EETLEDAPLKPPQEPKALQVERKAEGGSQPG	0	20964000	0	0	0	0	1	20964000	0	0	20964001	up
O35551	Rabep1	745	Rabep1-745	EIENCKEEIASISSLKAELERIKVEKGQLES	0	119450000	0	0	0	0	1	119450000	0	0	119450001	up
P16056	Met	773	Met-773	TITGIGKTLNSVSLPKLVIDVHEVGVNYTVA	0	0	0	0	0	0	1	0	0	0	1	nochange
P30204	Msr1	110	Msr1-110	TSDTSQGPMEKENTSKVEMRFTIIMEHMKDM	0	55827000	20905000	0	0	0	2	38366000	0	0	38366001	up
P39428	Traf1	186	Traf1-186	LQHLVKEKLLAQLEEKLRVFANIVAVLNKEV	0	136290000	161580000	0	0	0	2	148935000	0	0	148935001	up
P51660	Hsd17b4	701	Hsd17b4-701	TIIISDEDFMEVVFGKLDPQKAFFSGRLKAR	0	0	0	0	0	0	1	0	0	0	1	nochange
P51660	Hsd17b4	706	Hsd17b4-706	DEDFMEVVFGKLDPQKAFFSGRLKARGNIML	0	0	0	0	0	0	1	0	0	0	1	nochange
P56564	Slc1a3	384	Slc1a3-384	LPITFKCLEENNGVDKRITRFVLPVGATINM	0	0	0	0	0	0	1	0	0	0	1	nochange
P63085	Mapk1	290	Mapk1-290	RLFPNADSKALDLLDKMLTFNPHKRIEVEQA	0	4557900000	0	0	0	0	1	4557900000	0	0	4557900001	up
P63085	Mapk1	298	Mapk1-298	KALDLLDKMLTFNPHKRIEVEQALAHPYLEQ	0	4557900000	0	0	0	0	1	4557900000	0	0	4557900001	up
Q1JRP2	Tmprss11c	133	Tmprss11c-133	QVSKAKGKVVIHAVLKFKACYRNNVEKYWES	0	7903500000	0	0	0	0	2	3951750000	0	0	3951750001	up
Q3U1J4	Ddb1	936	Ddb1-936	ILVGDLMRSVLLLAYKPMEGNFEEIARDFNP	0	0	0	0	0	0	1	0	0	0	1	nochange
Q3UFT3	Garem1	189	Garem1-189	LNTIFKKIGKLNSISKLGKGKMPCLICMNHR	0	108500000	0	216323000	0	164537200	2	54250000	2	190430100	0.284881	down
Q5FW85	Ecm2	108	Ecm2-108	GKKGYCFVKGMIMYNKAVWSPEPCTTCLCSN	0	124036000	60100000	0	0	0	2	92068000	0	0	92068001	up
Q60948	Mxd4	41	Mxd4-41	GYASMLPFDGDFARKKTKTAGLVRKGPNNRS	0	48549000	62239000	0	0	0	2	55394000	0	0	55394001	up
Q60948	Mxd4	43	Mxd4-43	ASMLPFDGDFARKKTKTAGLVRKGPNNRSSH	0	48549000	62239000	0	0	0	2	55394000	0	0	55394001	up
Q60948	Mxd4	50	Mxd4-50	GDFARKKTKTAGLVRKGPNNRSSHNELEKHR	0	48549000	62239000	0	0	0	2	55394000	0	0	55394001	up
Q6PHS9	Cacna2d2	117	Cacna2d2-117	KDNRNLFEVQENEPQKLVEKVAGDIESLLDR	0	0	0	0	0	0	1	0	0	0	1	nochange
Q6PHS9	Cacna2d2	121	Cacna2d2-121	NLFEVQENEPQKLVEKVAGDIESLLDRKVQA	0	0	0	0	0	0	1	0	0	0	1	nochange
Q78JW9	Ubfd1	247	Ubfd1-247	DAKAEENKKEPLCRQKQHRKVLDKGKPEDVM	0	0	0	0	191140000	0	2	0	1	191140000	5.23177e-09	down
Q810N6	Ankrd45	93	Ankrd45-93	NLLYAACMAGKSDVIKALAKYGVNLNEATAR	0	310520000	0	0	0	0	1	310520000	0	0	310520001	up
Q810N6	Ankrd45	97	Ankrd45-97	AACMAGKSDVIKALAKYGVNLNEATARGYTL	0	310520000	0	0	0	0	1	310520000	0	0	310520001	up
Q91WD4	Cg025	43	Cg025-43	RKGGIEGGAKLCSKLKAELKFLQKIEAGKVA	0	432530000	119320000	0	0	0	2	275925000	0	0	275925001	up
Q9EP75	Cyp4f14	386	Cyp4f14-386	EWDDLAQLPFLTMCIKESLRLHPPVTVISRC	0	523960000	0	11266000	28551000	0	1	523960000	2	19908500	26.3184	up
Q99PL6	Ubxn6	33	Ubxn6-33	GPGQKLTDSAGEKTTKGKSPQLALRQPRQGP	0	125640000	0	0	0	0	1	125640000	0	0	125640001	up
Q9D180	Cfap57	994	Cfap57-994	IKELKKQIEPRENEIKVMKEQIQEMEAELER	0	67161000	0	0	0	0	1	67161000	0	0	67161001	up
Q9DCD2	Xab2	590	Xab2-590	RARDLFEQALDGCPPKYAKTLYLLYAQLEEE	0	101120000	126400000	0	0	0	2	113760000	0	0	113760001	up
Q9QXZ0	Macf1	6157	Macf1-6157	DETDRDIIREPLTELKHLWENLGEKIAHRQH	0	496350000	0	0	0	0	1	496350000	0	0	496350001	up
Q9WVL2	Stat2	712	Stat2-712	ISNRQVDELQQPLELKQDSESLEVNAELLLA	0	498620000	0	0	0	0	1	498620000	0	0	498620001	up
Q9Z125	Creb3l1	195	Creb3l1-195	LPVIKAEPPEMSQFLKVTPEDLVQMPPTPPS	0	921940000	471860000	0	0	0	2	696900000	0	0	696900001	up
A2AEY4	Map7d3	698	Map7d3-698	PSGGKMLSMKLKKFHKYAKTKPQKLVFLQSG	0	0	0	0	0	0	1	0	0	0	1	nochange
O08641	Sh3yl1	18	Sh3yl1-18	NPIPSNLKSEAKKAAKILREFTEITSRNGPD	0	3062900000	0	0	0	0	1	3062900000	0	0	3062900001	up
P0DM40	Fer1l5	315	Fer1l5-315	DQKLPYEQNTRVQIFKSKEVPVSLAYLQFFI	0	43654000	0	0	0	0	1	43654000	0	0	43654001	up
P0DM40	Fer1l5	317	Fer1l5-317	KLPYEQNTRVQIFKSKEVPVSLAYLQFFIYC	0	43654000	0	0	0	0	1	43654000	0	0	43654001	up
P17141	Zfp37	80	Zfp37-80	GKKASPSSLKKIARPKTAGTSAKLQQDDEHR	0	0	0	0	0	0	1	0	0	0	1	nochange
P17427	Ap2a2	614	Ap2a2-614	EEMPPFPERESSILAKLKKKKGPSTVTDLEE;EEMPPFPERESSILAKLKRKKGPGAASALDD	0	0	0	0	0	0	1	0	0	0	1	nochange
P17427	Ap2a2	616	Ap2a2-616	MPPFPERESSILAKLKKKKGPSTVTDLEETK;MPPFPERESSILAKLKRKKGPGAASALDDSR	0	0	0	0	0	0	1	0	0	0	1	nochange
P27046	Man2a1	674	Man2a1-674	ERHSVVSIRVNSATVKVLSDSGKPVEVQVSA	0	5250400	0	0	0	0	1	5250400	0	0	5250401	up
P60060	Sec61g	27	Sec61g-27	RQFVKDSIRLVKRCTKPDRKEFQKIAMATAI	0	0	0	0	0	0	1	0	0	0	1	nochange
P97784	Cry1	322	Cry1-322	DKMEGNPICVQIPWDKNPEALAKWAEGRTGF	0	16583000	0	0	0	0	1	16583000	0	0	16583001	up
Q32M02	Fscn2	218	Fscn2-218	EPEAHACYTLEFKAGKLAFKDCDGRYLAPVG	0	238110000	0	0	0	0	1	238110000	0	0	238110001	up
Q3UQN2	Fcho2	155	Fcho2-155	KENYTAKCVEQERLKKEGATQREIEKAAVKS	0	258820000	0	0	0	0	1	258820000	0	0	258820001	up
Q3UV17	Krt76	425	Krt76-425	QTSIAEAEQRGERALKDADTKFQDLQVALQK	0	97103000	0	0	0	0	1	97103000	0	0	97103001	up
Q5DID3	Umodl1	788	Umodl1-788	IVAKVCGKEGARTQLKVRTVAQKLAGNVRIT	0	0	0	0	0	0	1	0	0	0	1	nochange
Q6IFT4	Arhgap20	754	Arhgap20-754	DEDYLKQTQPQKKGDKVCLKQSSVTGTDVSK	0	6918900000	0	0	0	0	1	6918900000	0	0	6918900001	up
Q6IFT4	Arhgap20	758	Arhgap20-758	LKQTQPQKKGDKVCLKQSSVTGTDVSKRNTA	0	6918900000	0	0	0	0	1	6918900000	0	0	6918900001	up
Q6PGN3	Dclk2	154	Dclk2-154	LEGESYVCASNEPFRKVDYTKNVNPNWSVNI	0	34321000	0	0	0	0	1	34321000	0	0	34321001	up
Q8BKE5	Fsbp	76	Fsbp-76	PPRTAQGLRSLYKRLKEYAKQELLQQKEAQS	0	93993000	0	0	0	0	1	93993000	0	0	93993001	up
Q8C779	Radx	484	Radx-484	TGGHRGLPYTYDTKAKKIIQWIKTKTNLEAK	0	0	0	0	0	0	1	0	0	0	1	nochange
Q8C779	Radx	485	Radx-485	GGHRGLPYTYDTKAKKIIQWIKTKTNLEAKN	0	0	0	0	0	0	1	0	0	0	1	nochange
Q8K448	Abca5	29	Abca5-29	TRTLLLKNYLIKCRTKKSSVQEILFPLFFLF	0	0	0	0	0	0	1	0	0	0	1	nochange
Q8K448	Abca5	30	Abca5-30	RTLLLKNYLIKCRTKKSSVQEILFPLFFLFW	0	0	0	0	0	0	1	0	0	0	1	nochange
Q924K8	Mta3	61	Mta3-61	YRRRDISNTLIMLADKHAKETEEESETPVEA	0	196480000	0	0	0	0	1	196480000	0	0	196480001	up
Q9CR09	Ufc1	156	Ufc1-156	GLGPWLAVEVPDLIQKGVIQHKEKCSQ____	0	0	0	11591000	0	0	1	0	1	11591000	8.62738e-08	down
Q9CR09	Ufc1	162	Ufc1-162	AVEVPDLIQKGVIQHKEKCSQ__________	0	0	0	11591000	0	0	1	0	1	11591000	8.62738e-08	down
Q9CR33	Mansc1	218	Mansc1-218	SLQLPSELKMAHLLPKTVPTPPTTVAVAPLR	0	267630000	0	0	0	0	1	267630000	0	0	267630001	up
Q9DB85	Rrp8	96	Rrp8-96	SLASVSKEVGKKRKGKCQKQAPSISDSEGKE	0	0	0	0	0	0	1	0	0	0	1	nochange
Q9DBJ3	Baiap2l1	113	Baiap2l1-113	KDIIHELEKKTELDVKYMNATLKRYQAEHRN	0	3669500000	1280900000	204030000	48285000	156874000	2	2475200000	3	1.36396e+08	18.1471	up
A2ASS6	Ttn	10193	Ttn-10193	PKKPVPEEVVPVPIPKKVEPPAAKVPEAPKK	0	419650000	340400000	0	0	44174000	2	380025000	1	44174000	8.60291	up
A2ASS6	Ttn	10194	Ttn-10194	KKPVPEEVVPVPIPKKVEPPAAKVPEAPKKP	0	419650000	340400000	0	0	44174000	2	380025000	1	44174000	8.60291	up
B2RY04	Dock5	655	Dock5-655	LLNWRSNSQNIKHNLKKLMEVDGGEIVKFLQ	0	12696000	0	0	0	0	1	12696000	0	0	12696001	up
B2RY04	Dock5	656	Dock5-656	LNWRSNSQNIKHNLKKLMEVDGGEIVKFLQD	0	12696000	0	0	0	0	1	12696000	0	0	12696001	up
O70126	Aurkb	115	Aurkb-115	REKKSRFIVALKILFKSQIEKEGVEHQLRRE	0	422120000	0	0	0	0	1	422120000	0	0	422120001	up
O88199	Chst3	374	Chst3-374	YMLVRYEDVARRPLQKAREMYSFAGIPLTPQ	0	329160000	0	0	300126000	65950000	1	329160000	2	183038000	1.79832	nochange
P17427	Ap2a2	824	Ap2a2-824	GTFQNVSVKLPITLNKFFQPTEMASQDFFQR	0	28641000	0	0	0	0	1	28641000	0	0	28641001	up
P97290	Serping1	303	Serping1-303	SDTCLVLLNAVYLSAKWKITFEPKKMMAPFF	0	0	0	0	0	0	2	0	0	0	1	nochange
Q61329	Zfhx3	1012	Zfhx3-1012	KANFQLHCKTDKHVQKYQLVAHIKEGGKANE	0	83348000	0	0	0	0	1	83348000	0	0	83348001	up
Q61329	Zfhx3	1020	Zfhx3-1020	KTDKHVQKYQLVAHIKEGGKANEWRLKCVAI	0	83348000	0	0	0	0	1	83348000	0	0	83348001	up
Q61490	Alcam	257	Alcam-257	IYYPTEQVTIQVLPPKNAIKEGDNITLQCLG	0	113170000	0	0	0	0	1	113170000	0	0	113170001	up
Q61490	Alcam	261	Alcam-261	TEQVTIQVLPPKNAIKEGDNITLQCLGNGNP	0	113170000	0	0	0	0	1	113170000	0	0	113170001	up
Q6PCX9	Trim37	200	Trim37-200	AVEMMIARLDTQLKNKLITLMGQKTSLTQET	0	229170000	0	0	0	0	1	229170000	0	0	229170001	up
Q6PCX9	Trim37	208	Trim37-208	LDTQLKNKLITLMGQKTSLTQETELLESLLQ	0	229170000	0	0	0	0	1	229170000	0	0	229170001	up
Q8BYM8	Cars2	218	Cars2-218	PGDSDKRHSSDFALWKAAKPQEVFWASPWGD	0	402400000	0	0	0	0	2	201200000	0	0	201200001	up
Q8CHE4	Phlpp1	777	Phlpp1-777	MPHIKHVDLRLNILRKLMADEVDFVQHVTQL	0	0	0	0	0	0	1	0	0	0	1	nochange
Q8R035	Mrpl58	170	Mrpl58-170	RDMIAEASQVPKEPSKEDARLQRLRIEKMNR	0	73975000	0	0	0	0	1	73975000	0	0	73975001	up
Q99J77	Nans	315	Nans-315	KIPAGTTLTLDMLTVKVGEPKGYPPEDIFNL	0	0	0	0	0	0	1	0	0	0	1	nochange
Q9CZX8	Rps19	111	Rps19-111	SKSVARRVLQALEGLKMVEKDQDGGRKLTPQ	0	0	0	0	0	0	1	0	0	0	1	nochange
Q9CZX8	Rps19	115	Rps19-115	ARRVLQALEGLKMVEKDQDGGRKLTPQGQRD	0	0	0	0	0	0	1	0	0	0	1	nochange
Q9D3G5	Stx11	91	Stx11-91	MRRLSSIKRDTNSIAKAIKTRGEGIHQKLRS	0	396680000	0	0	0	139070000	1	396680000	1	139070000	2.85238	up
Q9D6F4	Gabra4	126	Gabra4-126	DGPIEILRLNNMMVTKVWTPDTFFRNGKKSV	0	0	0	0	0	0	1	0	0	0	1	nochange
Q9QYB2	Dach1	258	Dach1-258	ILRGLGAIQPGVNRCKLISRKDFETLYNDCT	0	243820000	0	0	0	0	1	243820000	0	0	243820001	up
A2A690	Tanc2	588	Tanc2-588	LKLIVTVRTSLQEITKLLPFHRIFLDRLEEN	0	11290000	0	0	0	0	1	11290000	0	0	11290001	up
A2AJ76	Hmcn2	3083	Hmcn2-3083	APGGPQEAIQVRAGDKAILSCETDSLPEPAV	0	257340000	0	0	0	0	1	257340000	0	0	257340001	up
D3YU81	Rfx8	312	Rfx8-312	KTYLSNMAKTMKMVLKNSRRIGLLKSDLRAI	0	623900000	0	0	0	0	1	623900000	0	0	623900001	up
E5FYH1	Topaz1	511	Topaz1-511	DSIIHQMNQTHLPDSKLLQPSLTERTTESSR	0	0	10500000000	13500000000	1995700000	1606200000	2	5250000000	3	5.70063e+09	0.92095	nochange
P19221	F2	369	F2-369	DSYIDGRIVEGWDAEKGIAPWQVMLFRKSPQ	0	0	0	0	0	0	1	0	0	0	1	nochange
P26618	Pdgfra	209	Pdgfra-209	KGRTFKTSEFNVYALKATSELNLEMDARQTV	0	0	0	0	0	0	1	0	0	0	1	nochange
P39749	Fen1	250	Fen1-250	SIRGIGAKRAVDLIQKHKSIEEIVRRLDPSK	0	129450000	0	0	0	0	1	129450000	0	0	129450001	up
P39749	Fen1	252	Fen1-252	RGIGAKRAVDLIQKHKSIEEIVRRLDPSKYP	0	129450000	0	0	0	0	1	129450000	0	0	129450001	up
P98192	Gnpat	506	Gnpat-506	PSLVALALHMTPGLRKEDVFSCFSFLRNVFS	0	0	0	0	0	0	1	0	0	0	1	nochange
Q02596	Glycam1	118	Glycam1-118	RPTTSAATTSEENLTKSSQTVEEELGKIIEG	0	141250000	0	0	0	0	1	141250000	0	0	141250001	up
Q61686	Cbx5	105	Cbx5-105	RKSSFSNSADDIKSKKKREQSNDIARGFERG	0	1250000000	0	0	0	0	1	1250000000	0	0	1250000001	up
Q61686	Cbx5	106	Cbx5-106	KSSFSNSADDIKSKKKREQSNDIARGFERGL	0	1250000000	0	0	0	0	1	1250000000	0	0	1250000001	up
Q6ZPE2	Sbf1	1057	Sbf1-1057	KDKGPSFRTLSRNLMKNAKKTIGRQYVTRKK	0	318500000	0	0	0	0	1	318500000	0	0	318500001	up
Q80X60	Efcab3	124	Efcab3-124	VLTDKKLFLKAVVPEKKICLDLANNPGILLF	0	0	0	0	0	0	1	0	0	0	1	nochange
Q91VH1	Adipor1	105	Adipor1-105	GRWRVIPYDVLPDWLKDNDYLLHGHRPPMPS	0	58226000	0	0	0	0	1	58226000	0	0	58226001	up
Q9D702	Tmem52	159	Tmem52-159	ASELPPSYDEVVKMIKAREEVAAPSEKTNSL	0	0	0	0	0	0	1	0	0	0	1	nochange
A3KGS3	Ralgapa2	332	Ralgapa2-332	LTATQNTKNGVDVLPKIIQTVGGGAIQEKVP	0	218380000	0	0	0	0	1	218380000	0	0	218380001	up
O70472	Tmem131	1591	Tmem131-1591	LYKLSLQTLNADIFLKQRQTSPTPASPSLPT	0	119090000	0	0	0	16182000	1	119090000	1	16182000	7.35941	up
O89001	Cpd	612	Cpd-612	TRIHLMPSMNPDGYEKSQEGDSISVVGRNNS	0	441360000	0	0	0	0	1	441360000	0	0	441360001	up
P01132	Egf	218	Egf-218	LETGGISVLTLDVLDKRLFWVQDSGEGSHAY	0	390210000	0	0	0	0	1	390210000	0	0	390210001	up
P06801	Me1	512	Me1-512	GRLYPPLNTIRGVSLKIAVKIVQDAYKEKMA	0	70373000	59862000	0	0	0	2	65117500	0	0	65117501	up
P06801	Me1	516	Me1-516	PPLNTIRGVSLKIAVKIVQDAYKEKMATVYP	0	70373000	59862000	0	0	0	2	65117500	0	0	65117501	up
P07141	Csf1	33	Csf1-33	SRLLLVCLLMSRSIAKEVSEHCSHMIGNGHL	0	22534000	62533000	0	0	0	2	42533500	0	0	42533501	up
Q4VAC9	Plekhg3	588	Plekhg3-588	EEEEEEESLAVAEQGKRHRESEGSKGCRRPS	0	229510000	199080000	24908000	0	0	2	214295000	1	24908000	8.60346	up
Q5DU14	Myo16	579	Myo16-579	RKHITGARISTYMLEKSRVVAQPPGQGTFLI	0	0	0	0	4426700	0	1	0	1	4426700	2.25902e-07	down
Q6A078	Cep290	939	Cep290-939	EKLGSLQRFKEMAIFKIAALQKVIDNSVSLS	0	0	0	0	0	0	1	0	0	0	1	nochange
Q6DIA2	Exoc3l4	643	Exoc3l4-643	DQAILSVAEILGETYKDDIRRHLETLIRSYP	0	0	0	0	0	0	1	0	0	0	1	nochange
Q6P2K6	Ppp4r3a	702	Ppp4r3a-702	SDKTKNDDDIMDPISKFMERKKLKESEEKEV	0	0	13974655000	0	0	0	2	6987327500	0	0	6987327501	up
Q80T14	Fras1	1170	Fras1-1170	NGKEVQLEKAGHFSWKDVNEKKVRFVHSKEK	0	0	0	0	0	0	1	0	0	0	1	nochange
Q8BH60	Gopc	424	Gopc-424	CKDSSGEMKMLQGYNKKAVRDAHENGDVGAA	0	213600000	0	0	0	0	1	213600000	0	0	213600001	up
Q8BH60	Gopc	425	Gopc-425	KDSSGEMKMLQGYNKKAVRDAHENGDVGAAG	0	213600000	0	0	0	0	1	213600000	0	0	213600001	up
Q8C165	Pm20d1	180	Pm20d1-180	ILHALELLLIRNYSPKRSFFIALGHDEEVSG	0	602500000	0	0	0	0	1	602500000	0	0	602500001	up
Q91V51	Ttll1	79	Ttll1-79	HFPNHYELTRKDLMVKNIKRYRKELEKEGSP	0	616520000	0	0	0	0	1	616520000	0	0	616520001	up
Q91V51	Ttll1	82	Ttll1-82	NHYELTRKDLMVKNIKRYRKELEKEGSPLAE	0	616520000	0	0	0	0	1	616520000	0	0	616520001	up
Q91W64	Cyp2c70	48	Cyp2c70-48	PTPLPIVGNILQVDVKNISKSMGMLAKKYGP	0	517880000	487450000	0	0	0	2	502665000	0	0	502665001	up
Q91YE7	Rbm5	549	Rbm5-549	SKTAQQIAKDMERWAKSLNKQKENFKNSFQP	0	180990000	0	0	0	0	1	180990000	0	0	180990001	up
Q99PI5	Lpin2	792	Lpin2-792	EKKPEKFKIECLNDIKNLFAPSRQPFYAAFG	0	892870000	269950000	0	0	0	2	581410000	0	0	581410001	up
Q9D1B8	Dcdc2c	93	Dcdc2c-93	LQTGGKYVAAGRERFKKLDYIHIVPRKPSKM	0	128690000	0	0	0	0	1	128690000	0	0	128690001	up
Q9D1B8	Dcdc2c	94	Dcdc2c-94	QTGGKYVAAGRERFKKLDYIHIVPRKPSKMR	0	128690000	0	0	0	0	1	128690000	0	0	128690001	up
Q9DB98	Leng1	163	Leng1-163	DEKIKNRLDPLKEMQKHLAKKRHSSESRPSR	0	619560000	0	0	0	0	1	619560000	0	0	619560001	up
Q9Z0R6	Itsn2	1452	Itsn2-1452	EKLFNSKSSAQFRMYKTPIFLNEVLVKLPTD	0	744630000	0	116190000	0	0	1	744630000	1	116190000	6.40873	up
A0A0G2JEB6	Cfap47	1663	Cfap47-1663	LEITTATKSTALSTLKGNYSVNIDMDNFEAW	0	86709000	0	0	0	0	1	86709000	0	0	86709001	up
A2BE28	Las1l	147	Las1l-147	IPDWIVELRHNLTHKKMPHINECRRGCYFVL	0	0	0	0	0	0	1	0	0	0	1	nochange
D3Z750	Mroh2a	1495	Mroh2a-1495	QCRAFFDNESELLRLKAFVLFGKLTKVVGIS	0	145960000	0	0	0	0	1	145960000	0	0	145960001	up
D3Z750	Mroh2a	1502	Mroh2a-1502	NESELLRLKAFVLFGKLTKVVGISKKHFFKG	0	145960000	0	0	0	0	1	145960000	0	0	145960001	up
O70445	Bard1	411	Bard1-411	SSPSTVKLSSGMPARKRNHRGETLLHIASIK	0	0	0	0	0	0	1	0	0	0	1	nochange
P16056	Met	1321	Met-1321	CPDALYEVMLKCWHPKAEMRPSFSELVSRIS	0	88192000	0	0	0	0	1	88192000	0	0	88192001	up
P27786	Cyp17a1	240	Cyp17a1-240	NKNLEMIKEHTKIREKTLVEMFEKCKEKFNS	0	208580000	0	0	0	0	1	208580000	0	0	208580001	up
P49962	Srp9	24	Srp9-24	EFSRAAEKLYLADPMKVRVVLKYRHVDGNLC	0	724730000	860287000	128780000	0	132900000	2	792508500	2	130840000	6.05708	up
P97429	Anxa4	256	Anxa4-256	KCMRSKPSYFAERLYKSMKGLGTDDNTLIRV	0	0	0	0	0	0	1	0	0	0	1	nochange
Q60899	Elavl2	95	Elavl2-95	LGYGFVNYIDPKDAEKAINTLNGLRLQTKTI	0	240140000	413580000	0	0	46788000	2	326860000	1	46788000	6.98598	up
Q62187	Ttf1	94	Ttf1-94	PQTPAQETLESEWPQKAKKKKRRGEPQTPTQ	0	0	0	0	0	0	1	0	0	0	1	nochange
Q8BGB2	Ttc7a	517	Ttc7a-517	ATDATLKSKQDELHRKALQTLERARELAPDD	0	54022000	0	0	0	0	1	54022000	0	0	54022001	up
Q8BLK9	Rps6kc1	347	Rps6kc1-347	PAEELKAFRVLGVIDKVLLVMDTRTEQTFIL	0	52576000	1000400000	119990000	26079000	0	2	526488000	2	73034500	7.20876	up
Q8VCC8	Rapgef3	46	Rapgef3-46	LPDVVPEGTLLNMVLKRMHRPRCCSYQLVFE	0	1820100000	0	0	0	0	1	1820100000	0	0	1820100001	up
A2ASS6	Ttn	27813	Ttn-27813	DGGSDISGYIIERREKNSLRWMRVNKKPVYD	0	0	0	0	0	0	1	0	0	0	1	nochange
A4Q9E5	Ttll3	846	Ttll3-846	QHDQLVGSKALSTTGKALMTLPTAKVLMSFP	0	36629000	0	0	0	0	1	36629000	0	0	36629001	up
Q2VPA6	Helq	570	Helq-570	MLCKFLSKDYLNHREKEKCEVIKSLRNIGNG	0	281750000	0	0	0	0	1	281750000	0	0	281750001	up
Q3UUG6	Tbc1d24	401	Tbc1d24-401	CEGHEPTLLLIKTTQKEVCGAYLSTDWSERT	0	563180000	0	0	0	0	1	563180000	0	0	563180001	up
Q5U462	Cdcp1	133	Cdcp1-133	LPILNRTFIWDVRAHKSIGLELQFATPRLRQ	0	95080000	0	0	0	0	1	95080000	0	0	95080001	up
Q8BML1	Mical2	1822	Mical2-1822	EEVEERQRTLAIQGVKLEKVLRGEAADSGTQ	0	47361000	0	0	0	0	1	47361000	0	0	47361001	up
Q9D180	Cfap57	997	Cfap57-997	LKKQIEPRENEIKVMKEQIQEMEAELERFHK	0	67161000	0	0	0	0	1	67161000	0	0	67161001	up
Q9D6A1	Myo1h	786	Myo1h-786	LVRKNYILNLRYHVPKNVLDKSWLRPPGILE	0	0	0	0	0	0	1	0	0	0	1	nochange
E9Q793	Jhy	698	Jhy-698	ALSILSKPQTSKTESKSAISRKKALDYAKTI	0	50816000	0	0	0	0	1	50816000	0	0	50816001	up
P17141	Zfp37	87	Zfp37-87	SLKKIARPKTAGTSAKLQQDDEHREEKQKSQ	0	0	0	0	0	0	1	0	0	0	1	nochange
Q01320	Top2a	1070	Top2a-1070	LEKIDGKIVIENKPKKELIKVLIQRGYDSDP	0	173820000	0	0	0	0	1	173820000	0	0	173820001	up
Q32M02	Fscn2	215	Fscn2-215	LVWEPEAHACYTLEFKAGKLAFKDCDGRYLA	0	238110000	0	0	0	0	1	238110000	0	0	238110001	up
Q3U821	Wdr75	120	Wdr75-120	FIPLHAEDSVFLTISKEEPDIFQLVSVKLPK	0	0	0	0	0	0	1	0	0	0	1	nochange
Q6P6J9	Txndc15	272	Txndc15-272	PMARFNHTDRTLETLKIFIFNQTGIEAKKNV	0	0	0	0	0	0	1	0	0	0	1	nochange
Q7TNU7	Letm2	129	Letm2-129	TEEKRSLRQKIVNELKYYYKGFSLLWIDTKV	0	674730000	0	0	0	0	1	674730000	0	0	674730001	up
Q7TNU7	Letm2	133	Letm2-133	RSLRQKIVNELKYYYKGFSLLWIDTKVAARI	0	674730000	0	0	0	0	1	674730000	0	0	674730001	up
Q80U62	Rubcn	204	Rubcn-204	ASMFARKQESPLLVTKSQSLTALPGSTYTPP	0	1894400000	0	0	0	583160000	1	1894400000	1	583160000	3.24851	up
Q8CJ27	Aspm	766	Aspm-766	KKVEIEIEVGRLLVRKDRHLWKDIGQRQKVL	0	117320000	0	0	0	0	1	117320000	0	0	117320001	up
Q9Z1Q9	Vars1	319	Vars1-319	VEAAWYPWWERQGFFKPEYGRPSVSAPNPRG	0	0	0	0	0	0	1	0	0	0	1	nochange
B2RQC6	Cad	1246	Cad-1246	GVDLVALATRIIMGEKVEPVGLMTGSGVVGV	0	294610000	916660000	0	0	0	2	605635000	0	0	605635001	up
E9Q876	Abca12	687	Abca12-687	EILNQLASGTHPLLDKMRSLRQMHLPRSVPL	0	635680000	0	0	0	0	1	635680000	0	0	635680001	up
Q497N6	Cep295nl	369	Cep295nl-369	QIAKYPLKSESLVPVKAGTSREQDDLLSLSP	0	71273000	0	0	0	0	1	71273000	0	0	71273001	up
Q70UZ7	Vwa2	488	Vwa2-488	LLLGVGSEILQAELVKITGSPKHVMVHTDPQ	0	0	0	0	0	0	1	0	0	0	1	nochange
Q8CIQ7	Dock3	1225	Dock3-1225	ENKKVGCTVNLMNFYKSEINKEEMYIRYIHK	0	124360000	0	0	0	0	1	124360000	0	0	124360001	up
Q9D495	Syce1	202	Syce1-202	MCVLDSSKEQLLKEEKLMKVKLEDVRQRLCA	0	208560000	0	0	0	0	1	208560000	0	0	208560001	up
P07724	Alb	558	Alb-558	KEKQIKKQTALAELVKHKPKATAEQLKTVMD	0	31960000	0	0	0	0	1	31960000	0	0	31960001	up
P07724	Alb	560	Alb-560	KQIKKQTALAELVKHKPKATAEQLKTVMDDF	0	31960000	0	0	0	0	1	31960000	0	0	31960001	up
Q3U2E2	Zmym5	517	Zmym5-517	LVKNNPPQIRNFNFPKDSAGKKFSETYYTRI	0	2695900000	0	0	0	0	2	1347950000	0	0	1347950001	up
Q3UFY8	Trmt10c	113	Trmt10c-113	LLGKEVPEHITEEDLKTLMECASKSAKKKYL	0	0	0	33723000	191509000	37879000	2	0	3	8.77037e+07	1.1402e-08	down
Q65Z40	Wapl	550	Wapl-550	KPISKQGDKSKENTRKIFSGPKRSPTKAVYN	0	38909000	0	0	0	0	1	38909000	0	0	38909001	up
Q6PEE2	Ctif	422	Ctif-422	NSEEMLGEIVRTIYQKAVSDRSFAFTAAKLC	0	244500000	0	0	0	0	1	244500000	0	0	244500001	up
Q8VHK9	Dhx36	730	Dhx36-730	AASLSFKDPFVIPLGKEKIADARRKELAKET	0	34981000	0	0	0	0	1	34981000	0	0	34981001	up
Q91XL9	Osbpl1a	563	Osbpl1a-563	SIWSILRKCIGMELSKITMPVIFNEPLSFLQ	0	21800000000	16365700000	60668000	1287781000	0	2	19082850000	2	674224500	28.3034	up
Q9CRD2	Emc2	276	Emc2-276	ANQINRAYQFAGRSKKETKYSLKAVEDMLET	0	0	0	0	0	0	1	0	0	0	1	nochange
Q9D424	Cabyr	67	Cabyr-67	SSLDIKDLIKQFHQMKVEKWAEGVTVEKKEC	0	109050000	0	0	0	0	1	109050000	0	0	109050001	up
Q9D424	Cabyr	70	Cabyr-70	DIKDLIKQFHQMKVEKWAEGVTVEKKECIKE	0	109050000	0	0	0	0	1	109050000	0	0	109050001	up
Q9Z277	Baz1b	818	Baz1b-818	EARNKENGKEENVLGKVDRKKEIVKIEQQVE	0	2656500000	0	0	0	0	1	2656500000	0	0	2656500001	up
Q9Z277	Baz1b	822	Baz1b-822	KENGKEENVLGKVDRKKEIVKIEQQVEVEAD	0	2656500000	0	0	0	0	1	2656500000	0	0	2656500001	up
Q3UWA6	Gucy2c	786	Gucy2c-786	SRNLEHLVEERTQLYKAERDRADHLNFMLLP	0	0	0	0	0	0	1	0	0	0	1	nochange
Q80YS6	Afap1	327	Afap1-327	EAKGTVSKVTGKKITKIIGLGKKKPSTDEQT	0	4466400000	0	0	0	0	1	4466400000	0	0	4466400001	up
Q8BH34	Sema3d	111	Sema3d-111	VDLNKNFKKIYWPAAKERVELCKLAGKDANA	0	114170000	0	0	0	0	1	114170000	0	0	114170001	up
Q8CE72	Cplane1	38	Cplane1-38	SWLGQENEAVFLLDEKFINEINLLSGRTKKK	0	31680000	0	0	0	0	1	31680000	0	0	31680001	up
A2ABU4	Myom3	492	Myom3-492	STEIPYDLGSKITISKNDFEDAVTIPSAPTN	0	0	0	0	0	0	1	0	0	0	1	nochange
D3Z690	Izumo4	181	Izumo4-181	CKSSAQWESAVQGLLKYINTWHKQDEKMRTT	0	110740000	296090000	0	0	0	2	203415000	0	0	203415001	up
O08638	Myh11	1800	Myh11-1800	SARQQLERQNKELRSKLQEVEGAVKAKLKST	0	0	0	0	0	0	1	0	0	0	1	nochange
P16056	Met	1316	Met-1316	LQPEYCPDALYEVMLKCWHPKAEMRPSFSEL	0	88192000	0	0	0	0	1	88192000	0	0	88192001	up
P27786	Cyp17a1	236	Cyp17a1-236	KIFPNKNLEMIKEHTKIREKTLVEMFEKCKE	0	208580000	0	0	0	0	1	208580000	0	0	208580001	up
P98064	Masp1	64	Masp1-64	SEVTWNITVPEGFRIKLYFMHFNLESSYLCE	0	72770000	0	0	0	0	1	72770000	0	0	72770001	up
Q08509	Eps8	321	Eps8-321	SKRKGPGEGVLTLRAKPPPPDEFVDCFQKFK	0	366980000	383229000	290490000	154794000	179050000	2	375104500	3	2.08111e+08	1.80242	nochange
Q60652	Klra5	210	Klra5-210	ISDSYWIGLSYDKKKKQWAWIDNGPSKLDMK	0	0	0	0	0	0	1	0	0	0	1	nochange
Q8C138	Adtrp	116	Adtrp-116	VFWTLFHYDRSLVYPKGLDDFFPAWVNHAMH	0	63550000	0	0	0	278930000	1	63550000	1	278930000	0.227835	down
Q8K2H2	Otud6b	151	Otud6b-151	SEKLAQILAARELEIKQIPSDGHCMYGALED	0	0	73663000	0	0	0	2	36831500	0	0	36831501	up
Q9R0B9	Plod2	47	Plod2-47	GRIPADKLLVITVATKENDGFHRFMNSAKYF	0	94742000	0	0	0	0	1	94742000	0	0	94742001	up
A4Q9E5	Ttll3	839	Ttll3-839	QGRVLRLQHDQLVGSKALSTTGKALMTLPTA	0	36629000	0	0	0	0	1	36629000	0	0	36629001	up
P39428	Traf1	178	Traf1-178	CESQEELALQHLVKEKLLAQLEEKLRVFANI	0	136290000	161580000	0	0	0	2	148935000	0	0	148935001	up
Q2MHN3	Zfhx2	1290	Zfhx2-1290	IDARAEGAERGQEEFKEGETEGEAGTEKKGP	0	0	0	0	0	0	1	0	0	0	1	nochange
Q3UFT3	Garem1	183	Garem1-183	FKEKSRLNTIFKKIGKLNSISKLGKGKMPCL	0	108500000	0	216323000	0	164537200	2	54250000	2	190430100	0.284881	down
Q60575	Kif1b	1240	Kif1b-1240	PLSKPVPATKLNTMNKTTLGQSMSKYDLLVW	0	44300000	0	0	0	0	1	44300000	0	0	44300001	up
Q6BCL1	Pram1	341	Pram1-341	DLTRASSEPEVCKVPKKTQKPDPNVLSQKPS	0	28574000	0	0	0	0	1	28574000	0	0	28574001	up
Q80ZK9	Wdtc1	3	Wdtc1-3	_____________MAKVNITRDLIRRQVKER	0	0	0	0	0	79041000	1	0	1	79041000	1.26517e-08	down
Q8BYJ6	Tbc1d4	896	Tbc1d4-896	SRKVKLDYEEVGTCQKEILIAWDKKLLNCRT	0	101050000	0	0	0	0	1	101050000	0	0	101050001	up
Q8BYJ6	Tbc1d4	904	Tbc1d4-904	EEVGTCQKEILIAWDKKLLNCRTKIRCDMED	0	101050000	0	0	0	0	1	101050000	0	0	101050001	up
Q8BYJ6	Tbc1d4	905	Tbc1d4-905	EVGTCQKEILIAWDKKLLNCRTKIRCDMEDI	0	101050000	0	0	0	0	1	101050000	0	0	101050001	up
Q8CC88	Vwa8	1214	Vwa8-1214	SAIRRLVLPTEEFTSKKSSWWSKEEGETYRM	0	7774500	0	0	0	0	1	7774500	0	0	7774501	up
Q8CC88	Vwa8	1215	Vwa8-1215	AIRRLVLPTEEFTSKKSSWWSKEEGETYRMC	0	7774500	0	0	0	0	1	7774500	0	0	7774501	up
Q8CCJ3	Ufl1	779	Ufl1-779	TNATRKELQELSLSIKDLVLKSRKSSVTEE_	0	89055000	0	0	0	0	1	89055000	0	0	89055001	up
Q8CEE6	Pask	601	Pask-601	PSAAESYRESLLEESKSKPVDAKLFASCEDS	0	108320000	0	0	0	0	1	108320000	0	0	108320001	up
Q8CEE6	Pask	603	Pask-603	AAESYRESLLEESKSKPVDAKLFASCEDSEP	0	108320000	0	0	0	0	1	108320000	0	0	108320001	up
Q8CGF6	Wdr47	25	Wdr47-25	KEVEIIKLILDFLNSKKLHISMLALEKESGV	0	0	0	0	0	0	1	0	0	0	1	nochange
Q8CGF6	Wdr47	26	Wdr47-26	EVEIIKLILDFLNSKKLHISMLALEKESGVI	0	0	0	0	0	0	1	0	0	0	1	nochange
Q8CGY6	Unc45b	569	Unc45b-569	ALQAMFELAKARTSDKTILYSVANTLVNCTN	0	132190000	0	0	0	0	1	132190000	0	0	132190001	up
Q8K1T1	Lrrc25	234	Lrrc25-234	VTDFLPRYSSRRPGPKAPDSPPSRFTMDYEN	0	0	0	0	0	0	1	0	0	0	1	nochange
Q99PL6	Ubxn6	35	Ubxn6-35	GQKLTDSAGEKTTKGKSPQLALRQPRQGPTD	0	125640000	0	0	0	0	1	125640000	0	0	125640001	up
Q9D6A1	Myo1h	791	Myo1h-791	YILNLRYHVPKNVLDKSWLRPPGILENASNL	0	0	0	0	0	0	1	0	0	0	1	nochange
Q9EQH3	Vps35	749	Vps35-749	ENDAVTIQVLNQLIQKIREDLPNLESSEETE	0	238467000	298660000	0	0	0	2	268563500	0	0	268563501	up
Q9QXZ0	Macf1	6166	Macf1-6166	EPLTELKHLWENLGEKIAHRQHKLEGALLAL	0	496350000	0	0	0	0	1	496350000	0	0	496350001	up
A2CI98	Dytn	262	Dytn-262	LDFDICELCFLSGLHKNSHEKSHTVMEECVQ	0	0	3595200000	0	0	0	2	1797600000	0	0	1797600001	up
A3KMP2	Ttc38	142	Ttc38-142	WEQILRDHPTDMLALKFSHDAYFYLGYQEQM	0	0	0	0	0	0	1	0	0	0	1	nochange
F8VPQ2	Arid4a	345	Arid4a-345	INKPPVLGYKDLNLFKLFRLVYHQGGCGNID	0	187460000	0	0	29031000	0	1	187460000	1	29031000	6.45724	up
O08641	Sh3yl1	15	Sh3yl1-15	_MNNPIPSNLKSEAKKAAKILREFTEITSRN	0	3062900000	0	0	0	0	1	3062900000	0	0	3062900001	up
O08983	Hps1	132	Hps1-132	EVHFGLVTVDGQLIRKELRPPDLEERARVWK	0	0	0	0	0	0	1	0	0	0	1	nochange
P17919	Hoxb1	244	Hoxb1-244	RVEIAATLELNETQVKIWFQNRRMKQKKRER	0	24289000	0	0	0	0	1	24289000	0	0	24289001	up
P97784	Cry1	329	Cry1-329	ICVQIPWDKNPEALAKWAEGRTGFPWIDAIM	0	16583000	0	0	0	0	1	16583000	0	0	16583001	up
Q0P5X1	Lrriq1	268	Lrriq1-268	EKYRQHEEHIRNLHLKMEEERTRLSELQEKE	0	224268000	912220000	0	0	0	2	568244000	0	0	568244001	up
Q3UQN2	Fcho2	154	Fcho2-154	SKENYTAKCVEQERLKKEGATQREIEKAAVK	0	258820000	0	0	0	0	1	258820000	0	0	258820001	up
Q6PGN3	Dclk2	159	Dclk2-159	YVCASNEPFRKVDYTKNVNPNWSVNIKGGTT	0	34321000	0	0	0	0	1	34321000	0	0	34321001	up
Q8C4Y3	Nelfb	210	Nelfb-210	RRQGEVVQKLTQMVGKNVKLYDMVLQFLRTL	0	0	0	0	0	0	2	0	0	0	1	nochange
Q8C6S9	Cfap54	2347	Cfap54-2347	STAILYSTLKLLQDSKVFKKKVPEESCSPTS	0	2845500000	0	0	0	0	1	2845500000	0	0	2845500001	up
Q9CR33	Mansc1	211	Mansc1-211	EEKSHSQSLQLPSELKMAHLLPKTVPTPPTT	0	267630000	0	0	0	0	1	267630000	0	0	267630001	up
Q9DBJ3	Baiap2l1	120	Baiap2l1-120	EKKTELDVKYMNATLKRYQAEHRNKLDSLEK	0	3669500000	1280900000	204030000	48285000	156874000	2	2475200000	3	1.36396e+08	18.1471	up
Q9ERM2	Icam4	140	Icam4-140	RPRSVILEPPVLVGHKYTLRCYVTHVFPVGF	0	139970000	0	0	0	0	1	139970000	0	0	139970001	up
Q9QZ05	Eif2ak4	1335	Eif2ak4-1335	VQQHTGIIFQFLAFSKRRQRVVPEILAAGGR	0	557850000	0	0	0	0	1	557850000	0	0	557850001	up
B1AWN6	Scn2a	2005	Scn2a-2005	DKSEKEDKGKDIRESKK______________	0	419370000	0	0	0	0	1	419370000	0	0	419370001	up
E9Q555	Rnf213	1276	Rnf213-1276	ITFAEVDAIFKDFVDKYDELKNDLKFMCTMN	0	815040000	0	52009000	228720000	0	1	815040000	2	140364500	5.8066	up
Q8CF90	Mafa	28	Mafa-28	SSPLAIEYVNDFDLMKFEVKKEPPEAERFCH	0	680810000	0	0	0	0	1	680810000	0	0	680810001	up
Q3URR0	Cenpw	78	Cenpw-78	SKSRVIKKDHVLAAGKVILKKSRG_______	0	125260000	710334000	24422000	0	0	2	417797000	1	24422000	17.1074	up
Q497N6	Cep295nl	361	Cep295nl-361	DSEYPRYQQIAKYPLKSESLVPVKAGTSREQ	0	71273000	0	0	0	0	1	71273000	0	0	71273001	up
Q8BWU8	Etnppl	373	Etnppl-373	GDIRGVGLFIGIDLVKDREKRTPATAEAQHI	0	69785000	0	0	0	0	1	69785000	0	0	69785001	up
Q8BZ97	Prdm8	65	Prdm8-65	SLYDSIAFVALKSTDKRTVPYIFRVDTSAAN	0	106260000	0	0	0	0	1	106260000	0	0	106260001	up
Q8K382	Dennd1a	942	Dennd1a-942	RTLPLARSSARAAEAKQGLALRPGESPLLPP	0	0	0	0	0	0	1	0	0	0	1	nochange
Q8K3V7	Minar1	825	Minar1-825	NPLYTDMRLTELAEVKRGQPSWTIEEYARNS	0	44675000	0	0	0	0	1	44675000	0	0	44675001	up
Q9D3G5	Stx11	94	Stx11-94	LSSIKRDTNSIAKAIKTRGEGIHQKLRSMKE	0	396680000	0	0	0	139070000	1	396680000	1	139070000	2.85238	up
B1ARD8	Slfn8	39	Slfn8-39	TIGEEDRNKMDSKKRKLEKTRITEAACALLN	0	59502000	0	0	0	0	1	59502000	0	0	59502001	up
B1ARD8	Slfn8	42	Slfn8-42	EEDRNKMDSKKRKLEKTRITEAACALLNSGG	0	59502000	0	0	0	0	1	59502000	0	0	59502001	up
D3YU81	Rfx8	308	Rfx8-308	RLRRKTYLSNMAKTMKMVLKNSRRIGLLKSD	0	623900000	0	0	0	0	1	623900000	0	0	623900001	up
O88428	Papss2	608	Papss2-608	EGEDPPDGFMAPKAWKVLTDYYRSLEKTN__	0	524090000	0	0	134080000	0	1	524090000	1	134080000	3.90879	up
P29533	Vcam1	171	Vcam1-171	DQLMNRQEFSSEEMTKSLETKSLEVTFTPVI	0	0	0	0	0	0	1	0	0	0	1	nochange
Q3TL44	Nlrx1	934	Nlrx1-934	RNVHSWDPLRVQRHLKLLLRDLEDSRGATLN	0	220980000	172340000	0	0	0	2	196660000	0	0	196660001	up
Q3URR0	Cenpw	70	Cenpw-70	ESRTNACESKSRVIKKDHVLAAGKVILKKSR	0	108050000	0	0	0	0	1	108050000	0	0	108050001	up
Q61686	Cbx5	104	Cbx5-104	KRKSSFSNSADDIKSKKKREQSNDIARGFER	0	1250000000	0	0	0	0	1	1250000000	0	0	1250000001	up
Q62189	Snrpa	86	Snrpa-86	ATNALRSMQGFPFYDKPMRIQYAKTDSDIIA	0	72552000	0	0	0	0	1	72552000	0	0	72552001	up
Q62240	Kdm5d	1117	Kdm5d-1117	ADAGSVSTKRSRWIEKEMGLYKYDTELLGLS	0	0	36156000	0	0	0	2	18078000	0	0	18078001	up
Q6PEE2	Ctif	435	Ctif-435	YQKAVSDRSFAFTAAKLCDKMALFMVEGTKF	0	244500000	0	0	0	0	1	244500000	0	0	244500001	up
Q810N6	Ankrd45	176	Ankrd45-176	LDWADARLILKKIITKSSLIITDPEKGPGKL	0	81749000	54676000	0	0	0	2	68212500	0	0	68212501	up
Q8BGN3	Enpp6	218	Enpp6-218	SPQRKDALRAVDTVLKYMIQWIQDRGLQQDL	0	709320000	0	0	0	0	1	709320000	0	0	709320001	up
Q8R5F3	Oard1	85	Oard1-85	VLKRDGRYIYYLITKKRASHKPTYENLQKSL	0	653130000	0	0	0	0	1	653130000	0	0	653130001	up
Q91V92	Acly	82	Acly-82	GKLGLVGVNLSLDGVKSWLKPRLGHEATVGK	0	0	0	0	0	0	1	0	0	0	1	nochange
Q9D702	Tmem52	156	Tmem52-156	SLYASELPPSYDEVVKMIKAREEVAAPSEKT	0	0	0	0	0	0	1	0	0	0	1	nochange
A0A087WPF7	Auts2	138	Auts2-138	KKKREALTNGLSFHSKKSRLSHSHHYSSDRE	0	88145000	0	0	0	0	1	88145000	0	0	88145001	up
A0A087WPF7	Auts2	139	Auts2-139	KKREALTNGLSFHSKKSRLSHSHHYSSDREN	0	88145000	0	0	0	0	1	88145000	0	0	88145001	up
Q80Y50	Camta2	1177	Camta2-1177	NKGTFLTKKQDQAARKIMRFLRRCRHRMREL	0	273670000	0	0	0	0	1	273670000	0	0	273670001	up
E9QA62	Lmod3	226	Lmod3-226	KDTSETKEKGEKKIAKLDPKKLALDTSFLKV	0	0	0	0	0	0	1	0	0	0	1	nochange
O35646	Capn6	261	Capn6-261	WGLLKGYTYTMTDIRKLRLGERLVEVFSTEK	0	0	0	0	0	0	1	0	0	0	1	nochange
P28740	Kif2a	669	Kif2a-669	DVDSYATQLEAILEQKIDILTELRDKVKSFR	0	0	0	0	0	0	1	0	0	0	1	nochange
P35585	Ap1m1	199	Ap1m1-199	SANGNVLRSEIVGSIKMRVFLSGMPELRLGL	0	0	52098000	0	0	0	2	26049000	0	0	26049001	up
P46097	Syt2	201	Syt2-201	LLPDKKKKYETKVHRKTLNPAFNETFTFKVP	0	113562000	0	0	0	0	1	113562000	0	0	113562001	up
P58269	Dpf3	129	Dpf3-129	ESTTLEALLRGEGVEKKVDAREEESIQEIQR	0	194640000	0	0	0	0	1	194640000	0	0	194640001	up
P58269	Dpf3	130	Dpf3-130	STTLEALLRGEGVEKKVDAREEESIQEIQRV	0	194640000	0	0	0	0	1	194640000	0	0	194640001	up
P61407	Tdrd6	1700	Tdrd6-1700	VELRSKGENINEKMKKYAKTGVPKNDLSSEK	0	97399000	11231266000	0	0	0	2	5664332500	0	0	5664332501	up
P97822	Anp32e	12	Anp32e-12	____MEMKKKINMELKNRAPEEVTELVLDNC	0	195810000	0	0	0	0	1	195810000	0	0	195810001	up
Q3V0L5	Lrrc43	460	Lrrc43-460	SAPLPQSIDSSEELAKLRPKIDIQLCPSPGT	0	0	0	0	0	0	1	0	0	0	1	nochange
Q61702	Itih1	104	Itih1-104	PKTAFISDFAITSDGKAFIGDIKDKVTAWKQ	0	178950000	241770000	0	0	0	2	210360000	0	0	210360001	up
Q61738	Itga7	825	Itga7-825	LSTSGITIETTELEVKLLLATISEQELDPVS	0	0	0	0	0	0	1	0	0	0	1	nochange
Q6A078	Cep290	945	Cep290-945	QRFKEMAIFKIAALQKVIDNSVSLSELELAN	0	0	0	0	0	0	1	0	0	0	1	nochange
Q811B1	Xylt1	510	Xylt1-510	KFVEYVAFSTDDLVTKMKQFYSYTLLPAESF	0	1398500000	0	0	0	14469000	1	1398500000	1	14469000	96.6549	up
Q8C1B1	Camsap2	461	Camsap2-461	NNSRASKHIRKNLSFKPVNGEEEESIEEELH	0	0	0	6035600	0	0	2	0	2	3017800	3.31367e-07	down
Q8VEK3	Hnrnpu	789	Hnrnpu-789	SQGYNQWQQGQFWGQKPWSQHYHQGYY____	0	225230000	0	0	0	0	1	225230000	0	0	225230001	up
Q8VI47	Abcc2	1509	Abcc2-1509	HTIMDSDKIMVLDSGKIVEYGSPEELLSNMG	0	62806000	0	0	0	0	1	62806000	0	0	62806001	up
Q99L28	Rsl24d1	100	Rsl24d1-100	LWNKTIDAMKRVEEIKQKRQAKFIMNRLKKN	0	325200000	0	0	0	0	1	325200000	0	0	325200001	up
Q99L28	Rsl24d1	102	Rsl24d1-102	NKTIDAMKRVEEIKQKRQAKFIMNRLKKNKE	0	325200000	0	0	0	0	1	325200000	0	0	325200001	up
Q99L28	Rsl24d1	106	Rsl24d1-106	DAMKRVEEIKQKRQAKFIMNRLKKNKELQKV	0	325200000	0	0	0	0	1	325200000	0	0	325200001	up
Q99N69	Lpxn	125	Lpxn-125	KADTSRKPLPDQQDHKASLDSMLGDLEQELQ	0	75648000	0	0	0	0	1	75648000	0	0	75648001	up
Q9JK97	Kcnq4	547	Kcnq4-547	KTVIRSVRILKFLVAKRKFKETLRPYDVKDV	0	0	0	0	0	0	1	0	0	0	1	nochange
O08638	Myh11	1795	Myh11-1795	AQKNESARQQLERQNKELRSKLQEVEGAVKA	0	0	0	0	0	0	1	0	0	0	1	nochange
O88987	Akap3	326	Akap3-326	KDTTIATILLKKVLMKHAKEVVSDLIDSFMK	0	259720000	0	0	0	0	1	259720000	0	0	259720001	up
O89094	Casp14	119	Casp14-119	EKMVRLEDLFEVLNNKNCKALRGKPKVYIIQ	0	51562000	0	0	0	0	1	51562000	0	0	51562001	up
O89094	Casp14	122	Casp14-122	VRLEDLFEVLNNKNCKALRGKPKVYIIQACR	0	51562000	0	0	0	0	1	51562000	0	0	51562001	up
O89094	Casp14	127	Casp14-127	LFEVLNNKNCKALRGKPKVYIIQACRGEHRD	0	51562000	0	0	0	0	1	51562000	0	0	51562001	up
P35821	Ptpn1	279	Ptpn1-279	ADQLRFSYLAVIEGAKFIMGDSSVQDQWKEL	0	0	0	0	0	0	1	0	0	0	1	nochange
P59764	Dock4	472	Dock4-472	FVLYHNNSPRWSELLKLPIPVDKFRGSHIRF	0	0	0	0	0	0	1	0	0	0	1	nochange
Q8CGK6	Ifnl3	101	Ifnl3-101	QERPKALQAEVALTLKVWENINDSALTTILG	0	0	0	0	0	0	1	0	0	0	1	nochange
Q66JW3	Tox	245	Tox-245	SKINGGEKRPASDMGKKPKTPKKKKKKDPNE	0	0	0	0	0	0	1	0	0	0	1	nochange
Q8CG47	Smc4	368	Smc4-368	SNVLSNEMKAKNSAVKDVEKKLNKVTKFIEQ	0	67049000	0	0	0	0	1	67049000	0	0	67049001	up
Q91V92	Acly	826	Acly-826	VPMDYSWARELGLIRKPASFMTSICDERGQE	0	798540000	0	0	0	0	1	798540000	0	0	798540001	up
Q91YM2	Arhgap35	365	Arhgap35-365	ALIPNLDEVDHLSCIKAKKLLETKPEFLKWF	0	167010000	0	0	0	0	1	167010000	0	0	167010001	up
Q922R5	Ppp4r3b	702	Ppp4r3b-702	EDDDEEGKAVITPVEKSKTEDDFPDSYEKFM	0	133770000	0	0	0	0	1	133770000	0	0	133770001	up
Q99MT2	Msh4	581	Msh4-581	DCAALSSDQLPSEFIKISKVKNSYSFTSADL	0	1028400000	0	736700000	0	0	1	1028400000	1	736700000	1.39595	nochange
Q9ES34	Ube3b	132	Ube3b-132	YVSLALSKDLTLLWIKQIKSILWHCCELLGQ	0	99244000	0	0	0	0	1	99244000	0	0	99244001	up
Q9JMH7	Neu3	390	Neu3-390	VEEQDLVACLFECGEKNEYERIDFCLFSDHE	0	176140000	0	0	0	0	1	176140000	0	0	176140001	up
Q9QZD4	Ercc4	633	Ercc4-633	QRYLTALRKEKEAFEKLIREKASMVVPEERE	0	254110000	0	0	0	0	1	254110000	0	0	254110001	up
O70251	Eef1b	147	Eef1b-147	KKPAVVAKSSILLDVKPWDDETDMTKLEECV	0	0	0	0	0	0	1	0	0	0	1	nochange
O70305	Atxn2	882	Atxn2-882	KDDREEKKDTTEQVRKSTLNPNAKEFNPRSF	0	0	0	0	0	0	1	0	0	0	1	nochange
P0C6F1	Dnah2	1721	Dnah2-1721	KERSDKKILKVSILNKYSEAIRGNLTKIMRL	0	0	40439000	0	0	0	1	40439000	0	0	40439001	up
Q07113	Igf2r	298	Igf2r-298	CPSERREGTIPKLTAKSNCRYEVEWITEYAC	0	0	52341000	0	0	0	1	52341000	0	0	52341001	up
Q3U4G0	Cdin1	266	Cdin1-266	FIQELDCNRERGILLKASFPTDIVTLCHSTA	0	0	0	0	0	0	1	0	0	0	1	nochange
Q3UZ57	Axdnd1	303	Axdnd1-303	TGDFLLSRYDALKVIKRLQENWTDIGFGILS	0	0	881300000	0	0	60512000	1	881300000	1	60512000	14.5641	up
Q69Z28	Adamts16	223	Adamts16-223	ERQAPRENEVLMITRKRDLARPHLHHDNFHL	0	0	0	97894000	0	0	1	0	1	97894000	1.02151e-08	down
Q7TM95	Tigd3	315	Tigd3-315	VILAFKAHYRHRLLSKLAAMQSGKEGTSLAE	0	0	0	0	0	0	1	0	0	0	1	nochange
Q8BGW4	Dcaf12l2	105	Dcaf12l2-105	PELLRERQLTLGPLNKVFASQWLNARQVVCG	0	0	71106000	0	0	0	1	71106000	0	0	71106001	up
Q922E4	Pcyt2	158	Pcyt2-158	GVSTTDLVGRMLLVTKAHHSSQEMSSEYREY	0	0	0	3414100	0	0	1	0	1	3414100	2.92903e-07	down
Q923B1	Dbr1	509	Dbr1-509	SGEGKCGETVESGDEKDLAKFPLKRLSDEHE	0	0	0	0	0	0	1	0	0	0	1	nochange
Q923B1	Dbr1	517	Dbr1-517	TVESGDEKDLAKFPLKRLSDEHEPEQRKKIK	0	0	0	0	0	0	1	0	0	0	1	nochange
Q924A2	Cic	1164	Cic-1164	GPKEKQKYHDLAFQVKEAHFKAHPDWKWCNK	0	0	46974000	0	0	0	1	46974000	0	0	46974001	up
Q9ESJ1	Cables1	518	Cables1-518	LLAAKVGSDLRKHEVKHLIDKLEEKFRLNRR	0	0	801190000	0	0	0	1	801190000	0	0	801190001	up
Q9QZ47	Tnnt3	189	Tnnt3-189	KADQKRGKKQTAREMKKKILAERRKPLNIDH	0	0	52604000	0	0	0	1	52604000	0	0	52604001	up
Q9QZ47	Tnnt3	190	Tnnt3-190	ADQKRGKKQTAREMKKKILAERRKPLNIDHL	0	0	52604000	0	0	0	1	52604000	0	0	52604001	up
A2AM05	Cntln	1224	Cntln-1224	EELEKKDLKMSVLISKLNDTETAMAQIETAA	0	0	276000000	0	0	0	1	276000000	0	0	276000001	up
O55103	Prx	826	Prx-826	GALGLEGQVQEAVPGKVEKPEGPRVAVGVGE	0	0	0	0	0	0	1	0	0	0	1	nochange
P31324	Prkar2b	391	Prkar2b-391	VQAFERLLGPCMEIMKRNIATYEEQLVALFG	0	0	121240000	0	0	0	1	121240000	0	0	121240001	up
Q9JMG7	Hdgfl3	18	Hdgfl3-18	RPRPREYKAGDLVFAKMKGYPHWPARIDELP	0	0	0	0	0	0	1	0	0	0	1	nochange
Q9JMG7	Hdgfl3	20	Hdgfl3-20	RPREYKAGDLVFAKMKGYPHWPARIDELPEG	0	0	0	0	0	0	1	0	0	0	1	nochange
P59279	Rab2b	8	Rab2b-8	________MTYAYLFKYIIIGDTGVGKSCLL	0	0	0	0	0	0	1	0	0	0	1	nochange
Q3TLH4	Prrc2c	2031	Prrc2c-2031	NENEVVPVLSEKATDKVPEPKEQRQKQPRAG	0	0	299420000	0	0	0	1	299420000	0	0	299420001	up
Q6PAM1	Txlna	349	Txlna-349	QQLVDAKLQQAQEMLKEAEERHQREKEFLLK	0	0	549390000	117200000	0	0	1	549390000	1	117200000	4.68763	up
Q6ZPL9	Ddx55	77	Ddx55-77	AFVIPILEILLRREEKLKKNQVGAIVITPTR	0	0	145880000	0	0	0	1	145880000	0	0	145880001	up
Q8BR92	Palm2	236	Palm2-236	VADGSLGHPKEHMLCKEAKLEMVQKSRKDQS	0	0	926390000	0	0	0	1	926390000	0	0	926390001	up
Q8CD92	Ttc27	665	Ttc27-665	GEAIKAYHRLLDLRDKYKDIQVLKILVQAVV	0	0	2084800000	0	0	0	1	2084800000	0	0	2084800001	up
Q8CI08	Slain2	173	Slain2-173	YPSPDVECAKKSLIHKLDQTMSALKRQNLYN	0	0	70699000	0	0	0	1	70699000	0	0	70699001	up
Q8R4B8	Nlrp3	796	Nlrp3-796	HQCCFDISSVLSSSQKLVELDLSDNALGDFG	0	0	0	0	0	0	1	0	0	0	1	nochange
Q8VE19	Mios	101	Mios-101	RVVLTSLGQDHNSKFKDLIGKEFVPKHARQC	0	0	0	0	0	0	1	0	0	0	1	nochange
Q9D773	Mrpl2	232	Mrpl2-232	LLRKVNGTAIIQLPSKRQMQVLESCTATVGR	0	0	0	0	0	0	1	0	0	0	1	nochange
Q9WVQ0	Pmfbp1	938	Pmfbp1-938	KLREQVKYIAKLTGEKDHLHNVMVHLQQENK	0	0	422300000	0	0	0	1	422300000	0	0	422300001	up
A2ASS6	Ttn	32526	Ttn-32526	KPDKPTGPIVIEALLKNSVVISWKPPADDGG	0	0	173360000	0	0	0	1	173360000	0	0	173360001	up
O35718	Socs3	6	Socs3-6	__________MVTHSKFPAAGMSRPLDTSLR	0	0	48985000	0	0	0	1	48985000	0	0	48985001	up
P11881	Itpr1	2190	Itpr1-2190	PGGQVDGDEALEFYAKHTAQIEIVRLDRTME	0	0	369220000	0	0	0	1	369220000	0	0	369220001	up
P63040	Cplx1	51	Cplx1-51	ERQEALRQAEEERKAKYAKMEAEREVMRQGI	0	0	0	0	0	0	1	0	0	0	1	nochange
Q5DTM8	Rnf20	666	Rnf20-666	APKEQRDKVQLMAAEKKSKAELEDLRQRLKD	0	0	42050000	0	0	0	1	42050000	0	0	42050001	up
Q5FWI3	Cemip2	1296	Cemip2-1296	IPPRSIVLLSTRGEIKQLNISDSLAVLGLAK	0	0	32654000	0	26743000	0	1	32654000	1	26743000	1.22103	nochange
Q6NZE7	Pabir2	102	Pabir2-102	DESLSLSDSDFDKPEKLYSPKRIDFTPVSPA	0	0	110270000	0	0	0	1	110270000	0	0	110270001	up
Q6NZE7	Pabir2	107	Pabir2-107	LSDSDFDKPEKLYSPKRIDFTPVSPAPSPTR	0	0	110270000	0	0	0	1	110270000	0	0	110270001	up
Q8BKC8	Pi4kb	330	Pi4kb-330	SFSSPVRLAPEREFIKSLMAIGKRLATLPTK	0	0	35399000	0	0	0	1	35399000	0	0	35399001	up
Q8C165	Pm20d1	294	Pm20d1-294	EQTPMPNMFGGGPLKKTMKLLANEFSFPINI	0	0	95465000	0	0	201240000	1	95465000	1	201240000	0.474384	down
Q8C165	Pm20d1	297	Pm20d1-297	PMPNMFGGGPLKKTMKLLANEFSFPINIVLR	0	0	95465000	0	0	201240000	1	95465000	1	201240000	0.474384	down
Q8R0F8	Fahd1	83	Fahd1-83	CRNLHHEVELGVLLGKRGEAIPEAAAMDYVA	0	0	0	0	0	0	1	0	0	0	1	nochange
Q8VC52	Rbpms2	101	Rbpms2-101	RFDPENPQTLRLEFAKANTKMAKSKLIATPN	0	0	0	0	0	0	1	0	0	0	1	nochange
Q9D8M7	Phf10	358	Phf10-358	QKSKDKMATPRKDGSKRSVLSKSAPGYKPKV	0	0	70842000	0	0	0	1	70842000	0	0	70842001	up
Q9D8M7	Phf10	364	Phf10-364	MATPRKDGSKRSVLSKSAPGYKPKVIPNALC	0	0	70842000	0	0	0	1	70842000	0	0	70842001	up
Q9DAK4	Fabp12	80	Fabp12-80	FKLGEEFEETTPSGRKSKSTVILDNDSLVQV	0	0	0	0	0	0	1	0	0	0	1	nochange
Q9Z0M3	Cdh20	414	Cdh20-414	PEDVTIGTTIQIISAKDPDVTNNSIRYSIDR	0	0	0	0	0	0	1	0	0	0	1	nochange
C8YR32	Loxhd1	616	Loxhd1-616	KGNADEFTIESVTMRKVRRVRVRHDGKGSGS	0	0	226870000	0	0	0	1	226870000	0	0	226870001	up
Q0VBN2	Dsel	73	Dsel-73	PNLYFDAGDIQTLKQKSRTSHLHIFRAIKSA	0	0	24900000000	0	0	0	1	24900000000	0	0	24900000001	up
Q3TUF7	Yeats2	5	Yeats2-5	___________MSGIKRTIKETDPDYEDVSV	0	0	0	0	0	0	1	0	0	0	1	nochange
Q3TUF7	Yeats2	9	Yeats2-9	_______MSGIKRTIKETDPDYEDVSVALPN	0	0	0	0	0	0	1	0	0	0	1	nochange
Q8CCE9	E4f1	145	E4f1-145	EDISHAPDLVGSGHIKEVIVAAEAEPGDVEM	0	0	108920000	0	0	0	1	108920000	0	0	108920001	up
Q8CG80	Shf	97	Shf-97	QFEGSENCLSPGREEKGRLPPRLSAGNPKSA	0	0	150930000	0	0	0	1	150930000	0	0	150930001	up
Q8VC19	Alas1	178	Alas1-178	EDPSRLLKNFQDIMRKQRPERVSHLLQDNLP	0	0	138060000	0	0	0	1	138060000	0	0	138060001	up
Q91VB4	Hps3	509	Hps3-509	PVQLYKEMVDYSNSYKTVKTESCLHLLSEAH	0	0	0	0	0	0	1	0	0	0	1	nochange
Q91ZH7	Abhd3	55	Abhd3-55	FSVAYACYYLSSIAKKPQLVIGGESFSRFLQ	0	0	29745300	0	16781000	0	1	29745300	3	5.59367e+06	5.31767	up
Q99MI1	Erc1	578	Erc1-578	KDMLDVKERKVNVLQKKIENLQEQLRDKEKQ	0	0	0	0	0	0	1	0	0	0	1	nochange
Q9CX56	Psmd8	301	Psmd8-301	LFAEATRILFFSTPKKMTDYAKKRGWVLGPN	0	0	0	0	0	0	1	0	0	0	1	nochange
Q9DB25	Alg5	239	Alg5-239	WFLCVKGIRDTQCGFKLLTREAAARTFSSLH	0	0	116880000	0	0	0	1	116880000	0	0	116880001	up
Q9DBT5	Ampd2	106	Ampd2-106	KLEPDILLRAKQDFLKTDSDSDLQLYKEQGE	0	0	61102000	0	0	0	1	61102000	0	0	61102001	up
Q9DCZ4	Apoo	3	Apoo-3	_____________MFKVIQRSVGPASLSLLT	0	0	0	0	0	0	1	0	0	0	1	nochange
A4Q9F4	Ttll11	566	Ttll11-566	PEAHLPSICLKQVFPKYAKQFNYLRLVDRMA	0	0	103730000	0	0	0	1	103730000	0	0	103730001	up
P01811	Hvm41	85	Hvm41-85	ISRDNAKNTLFLQMSKVRSEDTALYFCARNW	0	0	117590000	0	0	0	1	117590000	0	0	117590001	up
P10749	Il1b	214	Il1b-214	LESVDPKQYPKKKMEKRFVFNKIEVKSKVEF	0	0	0	0	0	0	1	0	0	0	1	nochange
P20357	Map2	1207	Map2-1207	TDEKGEVQMEFIQLPKEESTETPDIPAIPSD	0	0	42221000	0	0	0	1	42221000	0	0	42221001	up
P29452	Casp1	133	Casp1-133	QNKEDGTFPGLTGTLKFCPLEKAQKLWKENP	0	0	1173600000	0	0	0	1	1173600000	0	0	1173600001	up
P29452	Casp1	139	Casp1-139	TFPGLTGTLKFCPLEKAQKLWKENPSEIYPI	0	0	1173600000	0	0	0	1	1173600000	0	0	1173600001	up
P41233	Abca1	1556	Abca1-1556	NSQALPPSHEVNDAIKQMKKLLKLTKDSSAD	0	0	0	0	0	0	1	0	0	0	1	nochange
Q3TNW5	Mucl3	337	Mucl3-337	TASPTVFQRKTIVATKTVRATRTSERTPVFL	0	0	42603000	0	0	0	1	42603000	0	0	42603001	up
Q3USY0	Slc38a11	87	Slc38a11-87	FLVSYITDFSLVLLIKGGALSGTDSYQSLVN	0	0	0	0	0	0	1	0	1	0	1	nochange
Q3V1V3	Esf1	684	Esf1-684	EVKKIGIKKKSMKSAKDSASSEEETDLEKQK	0	0	0	0	0	0	1	0	0	0	1	nochange
Q5DTV4	Zc3h12c	20	Zc3h12c-20	KTLQEYGVLCIQEYRKSSKVESSARNSFMGL	0	0	158020000	0	0	0	1	158020000	0	0	158020001	up
Q5DTV4	Zc3h12c	23	Zc3h12c-23	QEYGVLCIQEYRKSSKVESSARNSFMGLKDH	0	0	158020000	0	0	0	1	158020000	0	0	158020001	up
Q61644	Pacsin1	215	Pacsin1-215	QKTQEKYEKVLEDVGKTTPQYMEGMEQVFEQ	0	0	153140000	0	0	0	1	153140000	0	0	153140001	up
Q62059	Vcan	79	Vcan-79	IKWSKMEVDKNGKDIKETTVLVAQNGNIKIG	0	0	51996000	0	0	0	1	51996000	0	0	51996001	up
Q62059	Vcan	92	Vcan-92	DIKETTVLVAQNGNIKIGQDYKGRVSVPTHP	0	0	51996000	0	0	0	1	51996000	0	0	51996001	up
Q7TMR0	Prcp	274	Prcp-274	LHLCSPLTSEKIPTLKGWIAETWVNLAMVNY	0	0	20087000	0	0	0	1	20087000	0	0	20087001	up
Q8BIK4	Dock9	1150	Dock9-1150	LQEFREVRVIAISMLKNLLIKHSFDDRYNSR	0	0	57327000	0	0	0	1	57327000	0	0	57327001	up
Q9JMA2	Qtrt1	303	Qtrt1-303	RFGSALVPTGNLQLKKKQYAKDFSPINPECP	0	0	62007000	0	0	0	1	62007000	0	0	62007001	up
Q9JMA2	Qtrt1	304	Qtrt1-304	FGSALVPTGNLQLKKKQYAKDFSPINPECPC	0	0	62007000	0	0	0	1	62007000	0	0	62007001	up
Q9WUP7	Uchl5	289	Uchl5-289	EVQKLKRYKIENIRRKHNYLPFIMELLKTLA	0	0	0	0	0	0	1	0	0	0	1	nochange
A2A8L1	Chd5	940	Chd5-940	LLGPHMLRRLKADVFKNMPAKTELIVRVELS	0	0	70911000	175193800	0	18796000	1	70911000	2	96994900	0.73108	nochange
A2A8L1	Chd5	945	Chd5-945	MLRRLKADVFKNMPAKTELIVRVELSQMQKK	0	0	70911000	175193800	0	18796000	1	70911000	2	96994900	0.73108	nochange
O09046	Il4i1	57	Il4i1-57	EQLLKVVTLGLNRTSKPQKVVVVGAGVAGLV	0	0	4170300000	1206700000	0	5257100000	1	4170300000	2	3231900000	1.29036	nochange
Q9QXB9	Drg2	363	Drg2-363	GLTHTMEHEDVIQIVKK______________	0	0	36797000	0	0	0	1	36797000	0	0	36797001	up
Q9QXB9	Drg2	364	Drg2-364	LTHTMEHEDVIQIVKK_______________	0	0	36797000	0	0	0	1	36797000	0	0	36797001	up
P52927	Hmga2	74	Hmga2-74	SPSKAAQKKAETIGEKRPRGRPRKWPQQVVQ	0	0	0	0	0	0	1	0	0	0	1	nochange
P58281	Opa1	940	Opa1-940	VKLLTGKRVQLAEDLKKVREIQEKLDAFIEA	0	0	0	0	0	0	1	0	0	0	1	nochange
P58281	Opa1	941	Opa1-941	KLLTGKRVQLAEDLKKVREIQEKLDAFIEAL	0	0	0	0	0	0	1	0	0	0	1	nochange
P97434	Mprip	126	Mprip-126	ARTGQKFSLCILTPDKEHFIRAETKEIISGW	0	0	59818000	0	0	0	1	59818000	0	0	59818001	up
Q3TVI4	Hexim2	89	Hexim2-89	QSPGGCSVEAVLARKKHRRRPSKRKRHWRPY	0	0	658270000	0	0	0	1	658270000	0	0	658270001	up
Q5SV66	Ccdc42	87	Ccdc42-87	LNLRWEELGIKEEQLKAHIQKFEQFIQENDQ	0	0	0	0	0	0	1	0	0	0	1	nochange
Q5XG71	Utp20	2628	Utp20-2628	KEEPSKPATLMWLIQKLSRMAKLEAAYSPRN	0	0	0	0	0	0	1	0	0	0	1	nochange
Q60680	Chuk	569	Chuk-569	GDLMESLEQRAIDLYKQLKHRPPDHLYSDST	0	0	0	0	0	0	1	0	0	0	1	nochange
Q61290	Cacna1e	81	Cacna1e-81	VNRSLFIFGEDNIVRKYAKKLIDWPPFEYMI	0	0	0	0	0	0	1	0	0	0	1	nochange
Q6P1C1	Ippk	275	Ippk-275	ELVHVITRVLLSSSEKARAGALRLGLQGPRV	0	0	4059000	0	0	0	1	4059000	0	0	4059001	up
Q8CDI7	Ccdc150	945	Ccdc150-945	RMKQIEMELRQMEIIKDQYQKKNYEQSLSIQ	0	0	0	0	0	0	1	0	0	0	1	nochange
Q8CDI7	Ccdc150	950	Ccdc150-950	EMELRQMEIIKDQYQKKNYEQSLSIQRFVSE	0	0	0	0	0	0	1	0	0	0	1	nochange
Q8CHV6	Tada2a	307	Tada2a-307	AGITNFCSARTYDHLKKTREEERLKRTMLSE	0	0	250540000	0	0	0	1	250540000	0	0	250540001	up
Q8CHV6	Tada2a	308	Tada2a-308	GITNFCSARTYDHLKKTREEERLKRTMLSEV	0	0	250540000	0	0	0	1	250540000	0	0	250540001	up
Q8JZM7	Cdc73	198	Cdc73-198	AAIKAKIMAKKRSTIKTDLDDDITALKQRSF	0	0	1246100000	230300000	0	171890000	1	1246100000	2	201095000	6.19657	up
Q8VDF3	Dapk2	268	Dapk2-268	QTSELAKDFIRKLLVKETRKRLTIQEALRHP	0	0	0	0	0	0	1	0	0	0	1	nochange
Q8VH31	Rfpl4a	175	Rfpl4a-175	SKEWDIGICKESINRKKAIHLSEKNGFWTVG	0	0	453460000	66758000	0	0	1	453460000	1	66758000	6.79259	up
Q8VH31	Rfpl4a	176	Rfpl4a-176	KEWDIGICKESINRKKAIHLSEKNGFWTVGV	0	0	453460000	66758000	0	0	1	453460000	1	66758000	6.79259	up
Q8VIJ6	Sfpq	505	Sfpq-505	DEMEKQQREQVEKNMKDAKDKLESEMEDAYH	0	0	258320000	0	0	0	1	258320000	0	0	258320001	up
Q9ES00	Ube4b	672	Ube4b-672	LNRTVEDLKNNESQWKDSPLATRHREMLKRC	0	0	0	0	0	0	1	0	0	0	1	nochange
Q62407	Speg	2419	Speg-2419	GEPGLVRRLSLSLSQKLRRTPPGQRHPAWES	0	0	56507000	25567000	0	0	1	56507000	1	25567000	2.21015	up
Q6P560	Znf182	303	Znf182-303	ERPFACPECGKAFREKSTVIIHYRTHTGEKP	0	0	121980000	0	0	0	1	121980000	0	0	121980001	up
Q810B8	Slitrk4	647	Slitrk4-647	VFVAFCLLVFVLRRNKKPTVKHEGLGNSECG	0	0	109920000	0	0	0	1	109920000	0	0	109920001	up
Q810B8	Slitrk4	652	Slitrk4-652	CLLVFVLRRNKKPTVKHEGLGNSECGSMQLQ	0	0	109920000	0	0	0	1	109920000	0	0	109920001	up
Q811J3	Ireb2	342	Ireb2-342	SNAFVTSIDIVLGITKHLRQVGVAGKFVEFF	0	0	29719000	0	0	0	1	29719000	0	0	29719001	up
Q6NVE9	Pptc7	248	Pptc7-248	DNMPDYMILQELKKLKNSNYESIQRTARSIA	0	0	0	0	0	0	1	0	0	0	1	nochange
Q6ZPL9	Ddx55	79	Ddx55-79	VIPILEILLRREEKLKKNQVGAIVITPTREL	0	0	145880000	0	0	0	1	145880000	0	0	145880001	up
Q8CFI7	Polr2b	337	Polr2b-337	GSRGAKPGVTKEKRIKYAKEVLQKEMLPHVG	0	0	885140000	0	0	0	1	885140000	0	0	885140001	up
Q99N16	Cyp4f3	294	Cyp4f3-294	LDQGGVDVLKAKAKAKTLDFIDVLLLSKDEH	0	0	106590000	0	0	0	1	106590000	0	0	106590001	up
Q9WVQ0	Pmfbp1	929	Pmfbp1-929	KIANEKLGNKLREQVKYIAKLTGEKDHLHNV	0	0	422300000	0	0	0	1	422300000	0	0	422300001	up
Q3V1M1	Igsf10	2432	Igsf10-2432	GGESLSLHCVSDGIPKPNVKWTTPGGLVIDR	0	0	256890000	0	0	0	1	256890000	0	0	256890001	up
Q5SUV5	Mylk4	335	Mylk4-335	WDLEDEEFQDISEEAKEFISKLLIKEKSWRI	0	0	29386000	0	0	0	1	29386000	0	0	29386001	up
Q60592	Mast2	446	Mast2-446	TDDSVEGRGVSQPSQKTPSEEDFETIKLISN	0	0	366860000	0	0	0	1	366860000	0	0	366860001	up
Q922H7	Rasl11b	222	Rasl11b-222	SSTPEKRRTSLIPRPKSPNMQDLKRRFKQAL	0	0	0	0	0	0	1	0	0	0	1	nochange
Q9WTU0	Phf2	630	Phf2-630	EEQRLEKSPLAGNKDKFSFSFSNRKLLGSKA	0	0	121730000	0	0	0	1	121730000	0	0	121730001	up
P97772	Grm1	918	Grm1-918	APKGQHVWQRLSVHVKTNETACNQTAVIKPL	0	0	2206300000	0	102210000	0	1	2206300000	2	51105000	43.1719	up
Q6NS52	Dgkb	64	Dgkb-64	GKQDILNQTIDFEGFKLFMKTFLEAELPDDF	0	0	397320000	199280000	176300000	0	1	397320000	2	187790000	2.11577	up
Q6NS52	Dgkb	68	Dgkb-68	ILNQTIDFEGFKLFMKTFLEAELPDDFTAHL	0	0	397320000	199280000	176300000	0	1	397320000	2	187790000	2.11577	up
Q8R001	Mapre2	30	Mapre2-30	NNDIIQDNGTIIPFRKHTVRGERSYSWGMAV	0	0	527580000	0	0	57769000	1	527580000	1	57769000	9.13258	up
A2AJK6	Chd7	918	Chd7-918	YEDSTWELKQDIDQTKIEEFEKLMSREPETE	0	0	0	0	0	0	1	0	0	0	1	nochange
Q0KL02	Trio	1498	Trio-1498	QGELILQESFQVWDPKTLIRKGRERHLFLFE	0	0	0	0	0	0	1	0	0	0	1	nochange
Q6NZN1	Pprc1	620	Pprc1-620	SLPVGPNLTSPVLADKKGIEPAVAIPTSDNL	0	0	59802000	0	0	0	1	59802000	0	0	59802001	up
Q78J03	Msrb2	169	Msrb2-169	PKPTGQRFCINSVALKFKPSKP_________	0	0	0	0	0	0	1	0	0	0	1	nochange
Q7TPV4	Mybbp1a	1262	Mybbp1a-1262	PSNPTLSPSTPAKTPKLQKKKEKLSQVNGAT	0	0	90305000	0	0	0	1	90305000	0	0	90305001	up
Q922Y0	Dyrk3	472	Dyrk3-472	TDGRVVLLGGRSRRGKKRGPPGSKDWATALK	0	0	18158000	0	0	0	1	18158000	0	0	18158001	up
Q9Z2A0	Pdpk1	157	Pdpk1-157	HPFFVKLYFTFQDDEKLYFGLSYAKNGELLK	0	0	2739600000	0	0	0	1	2739600000	0	0	2739600001	up
Q9Z2H7	Gipc2	249	Gipc2-249	TVEELPSEAKAKAIGKVDDLLELYMGIRDID	0	0	0	0	0	0	1	0	0	0	1	nochange
A2A995	Fyb2	613	Fyb2-613	EKESNDEDKVKTWKTKFLIPKGKKWGKGSQG	0	0	214350000	0	0	0	1	214350000	0	0	214350001	up
Q7TN88	Pkd1l2	925	Pkd1l2-925	SEVQSPGSGQLGMDIKRKVRELMLRSLSVVT	0	0	448680000	0	0	0	1	448680000	0	0	448680001	up
Q8BXN7	Ppm1k	144	Ppm1k-144	HGGPAAADFCHTHMEKCVMDLLPREKDLETV	0	0	0	0	0	0	1	0	0	0	1	nochange
O54917	E2f6	95	E2f6-95	RSAPGGILDLNKVATKLGVRKRRVYDITNVL	0	0	64204000	0	0	0	1	64204000	0	0	64204001	up
O54917	E2f6	100	E2f6-100	GILDLNKVATKLGVRKRRVYDITNVLDGIEL	0	0	64204000	0	0	0	1	64204000	0	0	64204001	up
O89019	Invs	584	Invs-584	YKVRKAFRDRKNLLMKHEQLRKDAAAKKREE	0	0	11411000	0	0	0	1	11411000	0	0	11411001	up
P42208	Septin2	34	Septin2-34	GFANLPNQVHRKSVKKGFEFTLMVVGESGLG	0	0	148230000	0	0	0	1	148230000	0	0	148230001	up
Q3UZ57	Axdnd1	300	Axdnd1-300	EKFTGDFLLSRYDALKVIKRLQENWTDIGFG	0	0	881300000	0	0	60512000	1	881300000	1	60512000	14.5641	up
Q61823	Pdcd4	336	Pdcd4-336	QQPVNHLVKEIDMLLKEYLLSGDISEAEHCL	0	0	103690000	0	0	0	1	103690000	0	0	103690001	up
Q62077	Plcg1	814	Plcg1-814	LFDYKAQREDELTFTKSAIIQNVEKQDGGWW	0	0	0	0	0	0	1	0	0	0	1	nochange
Q6IE82	Jade3	576	Jade3-576	EHQLSSPGSSSPGHSKRSPQMPEEPLDMNVK	0	0	140680000	0	0	0	1	140680000	0	0	140680001	up
Q80XE1	Ric8b	273	Ric8b-273	AVLRHCLLIVGPTEDKTEELHSNAVNLLSNV	0	0	0	0	0	0	1	0	0	0	1	nochange
Q8BZR9	Ncbp3	196	Ncbp3-196	LPAQDKMRSRDASEDKSSEKNKKDKQEDSSD	0	0	10600000	0	0	0	1	10600000	0	0	10600001	up
Q921K8	Tcaf2	429	Tcaf2-429	HFRGALSEFQAMLNHKEGNLEKRYSGKLGVD	0	0	199810000	0	0	0	1	199810000	0	0	199810001	up
Q9ESJ1	Cables1	514	Cables1-514	GACVLLAAKVGSDLRKHEVKHLIDKLEEKFR	0	0	801190000	0	0	0	1	801190000	0	0	801190001	up
Q9QXE7	Tbl1x	392	Tbl1x-392	LASCSDDMTLKIWSMKQDACVHDLQAHSKEI	0	0	244090000	0	0	0	1	244090000	0	0	244090001	up
Q9QXE7	Tbl1x	405	Tbl1x-405	SMKQDACVHDLQAHSKEIYTIKWSPTGPATS	0	0	244090000	0	0	0	1	244090000	0	0	244090001	up
Q9QZ47	Tnnt3	191	Tnnt3-191	DQKRGKKQTAREMKKKILAERRKPLNIDHLS	0	0	52604000	0	0	0	1	52604000	0	0	52604001	up
B2RY50	Odad2	922	Odad2-922	NLAVITDHGVVPLLSKLANTNNDKLRRHLAE	0	0	612110000	0	0	0	1	612110000	0	0	612110001	up
O89112	Lancl1	202	Lancl1-202	LTSGENLSRKRNLAAKSPLMYEWYQEYYVGA	0	0	282480000	0	0	0	1	282480000	0	0	282480001	up
Q61409	Pde3b	910	Pde3b-910	WSSENDRLLVCQVCIKLADINGPAKDRDLHL	0	0	26046000	0	0	0	1	26046000	0	0	26046001	up
Q6PHN1	Ccdc57	761	Ccdc57-761	IYVTHLQRKLKDAARKILSLRLEREQLLEMG	0	0	7479300000	0	0	0	1	7479300000	0	0	7479300001	up
Q8BIK4	Dock9	925	Dock9-925	QCHEEGLESHLRSYVKFAYKAEPYVASEYKT	0	0	0	0	0	0	1	0	0	0	1	nochange
Q8K4I7	Prss45	72	Prss45-72	ESHHWPWEASLQIEDKHVCGGALIDRSWVVS	0	0	478350000	0	60243000	85254000	1	478350000	2	72748500	6.57539	up
Q99N28	Cadm3	47	Cadm3-47	WTSDETVVAGGTVVLKCQVKDHEDSSLQWSN	0	0	0	0	0	0	1	0	0	0	1	nochange
Q9D2G2	Dlst	273	Dlst-273	SNIQEMRARHKDAFLKKHNLKLGFMSAFVKA	0	0	0	0	0	0	1	0	0	0	1	nochange
A2AA28	Mettl23	105	Mettl23-105	LEVGAGVSLPGILAAKCGAKVILSDSSEFPH	0	0	301000000	0	0	0	1	301000000	0	0	301000001	up
P22682	Cbl	896	Cbl-896	IQKALVIAHNNIEMAKNILREFVSISSPAHV	0	0	0	55491000	118144000	54734000	1	0	3	76123000	1.31366e-08	down
Q5SUV5	Mylk4	344	Mylk4-344	DISEEAKEFISKLLIKEKSWRISASEALKHP	0	0	29386000	0	0	0	1	29386000	0	0	29386001	up
Q61301	Ctnna2	358	Ctnna2-358	QDLLSEYMNNTGRKEKGDPLNIAIDKMTKKT	0	0	93281000	42624000	0	0	1	93281000	1	42624000	2.18846	up
Q6NXK8	Asic1	490	Asic1-490	RNSADKGVALSLDDVKRHNPCESLRGHPAGM	0	0	0	0	0	0	1	0	0	0	1	nochange
Q80VH0	Bank1	217	Bank1-217	GEIPCEKPGEIFILLKDELIGEILEVEFIST	0	0	64591000	0	0	0	1	64591000	0	0	64591001	up
Q8BI29	Sarg	179	Sarg-179	LEEPEKGQTSQGAKAKTIQPPAPSQKGTLDL	0	0	42050000	0	0	0	1	42050000	0	0	42050001	up
Q8BI29	Sarg	189	Sarg-189	QGAKAKTIQPPAPSQKGTLDLSTVLIPPPEA	0	0	42050000	0	0	0	1	42050000	0	0	42050001	up
Q8CE72	Cplane1	670	Cplane1-670	RQNMGHLIRLTANTVKLLLTQRQEHGSFSER	0	0	82241000	0	0	0	1	82241000	0	0	82241001	up
Q8K3H5	Myo3a	724	Myo3a-724	ELNIGILDIFGFENFKRNSFEQLCINIANEQ	0	0	90039000	0	0	21803000	1	90039000	1	21803000	4.12966	up
Q8VC52	Rbpms2	108	Rbpms2-108	QTLRLEFAKANTKMAKSKLIATPNPTSVHPA	0	0	0	0	0	0	1	0	0	0	1	nochange
Q8VC52	Rbpms2	110	Rbpms2-110	LRLEFAKANTKMAKSKLIATPNPTSVHPALG	0	0	0	0	0	0	1	0	0	0	1	nochange
Q91WM3	Rrp9	251	Rrp9-251	TFTGHRDAVSGLAFRKGTHQLYSTSHDRSVK	0	0	229760000	0	0	0	1	229760000	0	0	229760001	up
Q91YK0	Lrrc49	178	Lrrc49-178	LGKNRIKKISNLENLKNLDVLDLHGNQITKI	0	0	66771000	0	0	0	1	66771000	0	0	66771001	up
Q9CYH6	Rrs1	290	Rrs1-290	MNSKKPRLDVTRATNKQMREEDQEEAAKRRK	0	0	14322000	0	0	0	1	14322000	0	0	14322001	up
Q9DAK4	Fabp12	82	Fabp12-82	LGEEFEETTPSGRKSKSTVILDNDSLVQVQD	0	0	0	0	0	0	1	0	0	0	1	nochange
E5FYH1	Topaz1	1622	Topaz1-1622	SDPKLFIKHMTVNINKEQVYSLEHCSALKWL	0	0	53060000	0	0	0	1	53060000	0	0	53060001	up
E9Q2M9	Wdfy4	3104	Wdfy4-3104	GSKDGMVRIWKTEDVKMPVPRQAVMEEPSTE	0	0	122250000	0	0	0	1	122250000	0	0	122250001	up
F8VQ03	Adam3	513	Adam3-513	GVCRDPDRQCTDLFGKYAKGPNYVCAQEVNL	0	0	69747000	0	0	0	1	69747000	0	0	69747001	up
O54774	Ap3d1	921	Ap3d1-921	EDHVDHDQERKSSRHKKKKHRKEKEKEERPR	0	0	0	0	0	0	1	0	0	0	1	nochange
P47226	Tes	54	Tes-54	LHFWRKICRNCNVVKKSMTVLLSNEEDRKVG	0	0	280890000	94889000	149840000	0	1	280890000	2	122364500	2.29552	up
P61264	Stx1b	188	Stx1b-188	LAIFTDDIKMDSQMTKQALNEIETRHNEIIK	0	0	1054700000	704100000	885020000	75747000	1	1054700000	3	5.54956e+08	1.90051	nochange
Q07409	Cntn3	829	Cntn3-829	LSSSEIEVSWNTIPWKLSNGHLLGYEVRYWN	0	0	237870000	0	0	0	1	237870000	0	0	237870001	up
Q32LZ8	Pnpla5	98	Pnpla5-98	LGIFHPAYGPAEHIRKKLYENLPDNCHILAS	0	0	52807000	0	0	0	1	52807000	0	0	52807001	up
Q70FJ1	Akap9	1014	Akap9-1014	MGKVGDSGGSISKISKDLAEESKPMIEDKIP	0	0	0	0	0	0	1	0	0	0	1	nochange
Q8CG80	Shf	110	Shf-110	EEKGRLPPRLSAGNPKSAKPLGMEPSSPLGE	0	0	150930000	0	0	0	1	150930000	0	0	150930001	up
Q9D2G2	Dlst	278	Dlst-278	MRARHKDAFLKKHNLKLGFMSAFVKASAFAL	0	0	0	0	0	0	1	0	0	0	1	nochange
Q9R014	Ctsj	35	Ctsj-35	AHDPKLDAEWKDWKTKYAKSYSPKEEALRRA	0	0	0	0	0	0	1	0	0	0	1	nochange
P01811	Hvm41	76	Hvm41-76	TPFLKDKFIISRDNAKNTLFLQMSKVRSEDT	0	0	117590000	0	0	0	1	117590000	0	0	117590001	up
Q3V1V3	Esf1	681	Esf1-681	FAEEVKKIGIKKKSMKSAKDSASSEEETDLE	0	0	0	0	0	0	1	0	0	0	1	nochange
Q5SSZ7	Znrf3	181	Znrf3-181	NQGSEDPLKRPVVYVKGADAIKLMNIVNKQK	0	0	0	0	0	0	1	0	0	0	1	nochange
Q5VCS6	Tdrd5	737	Tdrd5-737	DINDGKCISYLKSAPKELLKDSKLSSLKTHK	0	0	466160000	0	0	0	1	466160000	0	0	466160001	up
Q6NZN1	Pprc1	621	Pprc1-621	LPVGPNLTSPVLADKKGIEPAVAIPTSDNLS	0	0	59802000	0	0	0	1	59802000	0	0	59802001	up
Q7TPV4	Mybbp1a	1266	Mybbp1a-1266	TLSPSTPAKTPKLQKKKEKLSQVNGATPVSP	0	0	90305000	0	0	0	1	90305000	0	0	90305001	up
Q80WQ8	Mis18bp1	451	Mis18bp1-451	KNKTRQETARVQEKQKSKKKDAEDKETYVLQ	0	0	0	0	0	0	1	0	0	0	1	nochange
Q8BFP9	Pdk1	92	Pdk1-92	MFLRQELPVRLANIMKEISLLPDNLLRTPSV	0	0	165630000	0	0	0	1	165630000	0	0	165630001	up
Q8BKX1	Baiap2	136	Baiap2-136	KKYQTEQRSKGDALDKCQAELKKLRKKSQGS	0	0	55854000	0	0	0	1	55854000	0	0	55854001	up
Q8BKX1	Baiap2	142	Baiap2-142	QRSKGDALDKCQAELKKLRKKSQGSKNPQKY	0	0	55854000	0	0	0	1	55854000	0	0	55854001	up
Q8BW86	Arhgef33	96	Arhgef33-96	EELSNAMSMIQAITSKQEEMQQKIEQLQQEK	0	0	713900000	0	0	0	1	713900000	0	0	713900001	up
Q8VCX5	Micu1	311	Micu1-311	KNFLEFQRKLQHDVLKLEFERHDPVDGRISE	0	0	0	0	0	0	1	0	0	0	1	nochange
Q9CQF6	Aasdhppt	69	Aasdhppt-69	ARDAKAALAGRLMIRKLVAEKLNIPWDHIRL	0	0	326290000	0	0	0	1	326290000	0	0	326290001	up
Q9JHU4	Dync1h1	3422	Dync1h1-3422	VEPLRNELQKLEDDAKDNQQKANEVEQMIRD	0	0	261190000	0	0	0	1	261190000	0	0	261190001	up
Q9JHU4	Dync1h1	3427	Dync1h1-3427	NELQKLEDDAKDNQQKANEVEQMIRDLEASI	0	0	261190000	0	0	0	1	261190000	0	0	261190001	up
Q9JIF7	Copb1	27	Copb1-27	INVPMDSEPPSEISLKNDLEKGDVKSKTEAL	0	0	125850000	0	0	0	1	125850000	0	0	125850001	up
E9Q401	Ryr2	4600	Ryr2-4600	CIIGYNCLKVPLVIFKREKELARKLEFDGLY;CIIGYYCLKVPLVIFKREKEVARKLEFDGLY	0	0	0	0	0	0	1	0	0	0	1	nochange
O35936	Alox8	358	Alox8-358	PIFLPSDDTWDWLLAKTWVRNSEFYIHEAVT	0	0	0	0	0	0	1	0	0	0	1	nochange
P18406	Ccn1	330	Ccn1-330	CVDGRCCTPLQTRTVKMRFRCEDGEMFSKNV	0	0	3610000000	0	0	0	1	3610000000	0	0	3610000001	up
P23818	Gria1	711	Gria1-711	FVRTTEEGMIRVRKSKGKYAYLLESTMNEYI	0	0	65666000	0	0	0	1	65666000	0	0	65666001	up
P52927	Hmga2	67	Hmga2-67	PKGSKNKSPSKAAQKKAETIGEKRPRGRPRK	0	0	0	0	0	0	1	0	0	0	1	nochange
Q3TVI4	Hexim2	96	Hexim2-96	VEAVLARKKHRRRPSKRKRHWRPYLELSWAE	0	0	658270000	0	0	0	1	658270000	0	0	658270001	up
Q3UFM5	Nom1	501	Nom1-501	GTFTEKDIELILLMLKNVGFALRKDDALSLK	0	0	101620000	0	0	0	1	101620000	0	0	101620001	up
Q60680	Chuk	572	Chuk-572	MESLEQRAIDLYKQLKHRPPDHLYSDSTEMV	0	0	0	0	0	0	1	0	0	0	1	nochange
Q7TN88	Pkd1l2	927	Pkd1l2-927	VQSPGSGQLGMDIKRKVRELMLRSLSVVTTG	0	0	448680000	0	0	0	1	448680000	0	0	448680001	up
Q8VDF3	Dapk2	264	Dapk2-264	EFFSQTSELAKDFIRKLLVKETRKRLTIQEA	0	0	0	0	0	0	1	0	0	0	1	nochange
Q8VH31	Rfpl4a	183	Rfpl4a-183	CKESINRKKAIHLSEKNGFWTVGVRAKKVYS	0	0	453460000	66758000	0	0	1	453460000	1	66758000	6.79259	up
Q8VIJ6	Sfpq	494	Sfpq-494	EYEYSQRWKSLDEMEKQQREQVEKNMKDAKD	0	0	258320000	0	0	0	1	258320000	0	0	258320001	up
Q9CQE8	RTRAF	41	RTRAF-41	RNFIVWLEDQKIRHYKIEDRGNLRNIHSSDW	0	0	50171000	0	0	0	1	50171000	0	0	50171001	up
Q9ES00	Ube4b	665	Ube4b-665	RLRAIRELNRTVEDLKNNESQWKDSPLATRH	0	0	0	0	0	0	1	0	0	0	1	nochange
B9EKE5	Catip	138	Catip-138	SVLKQDGQFVVTRSVKEGEETKTGVSVFPYK	0	0	0	75180000	126699000	501240000	0	0	3	234373000	4.2667e-09	down
Q3UHC2	Lrrk1	1506	Lrrk1-1506	QFHRLQALMMECWDTKPEKRPLALSVVSQMK	0	0	0	0	0	0	0	0	1	0	1	nochange
Q9JJC6	Rilpl1	56	Rilpl1-56	VIDQHGCESIARLMPKVVRVLEILEVLVSRH	0	0	0	2486800	0	3204500	0	0	2	2845650	3.51413e-07	down
A2AVA0	Svep1	805	Svep1-805	KRFANHGFKSFEMLYKTTRCDDMDLFKKFSA	0	0	0	1580600	0	0	0	0	1	1580600	6.32671e-07	down
A6X935	Itih4	838	Itih4-838	EYKWKKTLFSVLPGLKMTMNMMGLLQLSGPD	0	0	0	11770000	0	0	0	0	1	11770000	8.49618e-08	down
O55060	Tpmt	53	Tpmt-53	EQGHQLLKKHLDTFLKGQSGLRVFFPLCGKA	0	0	0	0	0	0	0	0	1	0	1	nochange
Q80SS5	Ifna12	157	Ifna12-157	AVRKYFHRITVYLREKKHSPCAWEVVRAEVW	0	0	0	11076000	0	0	0	0	1	11076000	9.02853e-08	down
Q80SS5	Ifna12	158	Ifna12-158	VRKYFHRITVYLREKKHSPCAWEVVRAEVWR	0	0	0	11076000	0	0	0	0	1	11076000	9.02853e-08	down
P48356	Lepr	782	Lepr-782	YLVIEWKILNEDDGMKWLRIPSNVKKFYIHD	0	0	0	327141000	171040000	131370000	0	0	3	2.0985e+08	4.7653e-09	down
P48757	Gast	24	Gast-24	LVLVLALATFSEASWKPRSQLQDASSGPGTN	0	0	0	15965000	11756000	0	0	0	2	13860500	7.21475e-08	down
Q3TCX3	Khdc4	75	Khdc4-75	AAAAVAAKINAMLMAKGKLKPSQNAAEKLQA	0	0	0	37653000	0	0	0	0	1	37653000	2.65583e-08	down
Q3TCX3	Khdc4	77	Khdc4-77	AAVAAKINAMLMAKGKLKPSQNAAEKLQAPG	0	0	0	37653000	0	0	0	0	1	37653000	2.65583e-08	down
Q3UZV7	Elapor2	368	Elapor2-368	IHTPCDEEGKTQIMYKWIEPKICREDLTDAI	0	0	0	28116300	18072000	34669000	0	0	3	2.69524e+07	3.71024e-08	down
Q3UZV7	Elapor2	373	Elapor2-373	DEEGKTQIMYKWIEPKICREDLTDAIRLPPS	0	0	0	28116300	18072000	34669000	0	0	3	2.69524e+07	3.71024e-08	down
Q4KUS2	Unc13a	1389	Unc13a-1389	ICEKTVLKRVLKELWKLVMNTMEKTIVLPPL	0	0	0	15140000	0	0	0	0	1	15140000	6.60502e-08	down
Q80YS6	Afap1	187	Afap1-187	LCVIKDTKLLCYKSSKDQQPQMELPLQGCSI	0	0	0	32954000	0	0	0	0	1	32954000	3.03453e-08	down
Q5FWH6	Arhgef15	601	Arhgef15-601	SSRQENAQKALGAVSKIIERCSAEVGRMKQT	0	0	0	0	0	0	0	0	1	0	1	nochange
Q8BZ60	Ston2	277	Ston2-277	DVPFNSTGSFKRDRPKSTLMNLPKVQKLDIS	0	0	0	75400000	0	0	0	0	1	75400000	1.32626e-08	down
Q8C735	Lin9	210	Lin9-210	IRLLQQRKVADVSQFKDLPDEIPLPLVIGTK	0	0	0	41830000	0	0	0	0	1	41830000	2.39063e-08	down
Q8C735	Lin9	225	Lin9-225	KDLPDEIPLPLVIGTKVTARLRGIHDGLFTG	0	0	0	41830000	0	0	0	0	1	41830000	2.39063e-08	down
Q8CFW1	Ano2	796	Ano2-796	KKFVTELRRPDAVRTKDIGIWFDILSGIGKF	0	0	0	0	0	0	0	0	1	0	1	nochange
Q8CI08	Slain2	144	Slain2-144	SWLYSSPKKKLTPMQKSVSPLVWCRQVLDYP	0	0	0	4826600	7398900	0	0	0	2	6112750	1.63592e-07	down
Q8R2M0	Tceanc2	145	Tceanc2-145	FRKNAQKLLSEALELKMDHLLVENIERETFH	0	0	0	22811000	0	0	0	0	1	22811000	4.38385e-08	down
Q9CQG2	Mettl16	515	Mettl16-515	DGAAGRYLFKCLVNIKKEAGDAVVEMHWVEG	0	0	0	139320000	0	0	0	0	1	139320000	7.17772e-09	down
Q9CVI2	Fam133b	79	Fam133b-79	KMNENWKKELEKHREKLLSGNESSSKKRQKK	0	0	0	9655300	0	0	0	0	1	9655300	1.0357e-07	down
A7KBS4	Zscan4d	307	Zscan4d-307	SDNIPRKKTDSLSINKRIYHSEPEEGDIPYG	0	0	0	4966400	21450000	18647600	0	0	3	1.50213e+07	6.6572e-08	down
E9Q401	Ryr2	2152	Ryr2-2152	EEKLMIRGLGDIMNNKVFYQHPNLMRALGMH	0	0	0	27785000	0	0	0	0	1	27785000	3.59906e-08	down
P14685	Psmd3	311	Psmd3-311	LEYSEARRTMTNALRKAPQHTAVGFKQTVHK	0	0	0	21124000	0	0	0	0	1	21124000	4.73395e-08	down
P28575	Ipp	238	Ipp-238	LDPVRFPLLPSQRLLKYIEGVSDFNLRVALQ	0	0	0	147810000	0	0	0	0	2	73905000	1.35309e-08	down
P97497	Shbg	66	Shbg-66	GPGQEPVMVMTIDLTKISKPHSSFEFRTWDP	0	0	0	62779000	0	0	0	0	1	62779000	1.59289e-08	down
P97497	Shbg	69	Shbg-69	QEPVMVMTIDLTKISKPHSSFEFRTWDPEGV	0	0	0	62779000	0	0	0	0	1	62779000	1.59289e-08	down
Q3TYX8	Rufy4	302	Rufy4-302	STASIQQQRSRAKDVKMQLTGRKVEGKGSLS	0	0	0	97516000	0	104550000	0	0	2	101033000	9.89776e-09	down
Q3URV1	Tbc1d32	639	Tbc1d32-639	GLQVLLPYGLHESIAKAWKKTSLLSERIPTP	0	0	0	119860000	40954000	115660000	0	0	3	92158000	1.08509e-08	down
Q5SSE9	Abca13	3313	Abca13-3313	VIQKANYTFYFVDKIKVLSETFLKISKLFQG	0	0	0	32677000	0	0	0	0	1	32677000	3.06026e-08	down
Q5SSE9	Abca13	3321	Abca13-3321	FYFVDKIKVLSETFLKISKLFQGSGNGQMFN	0	0	0	32677000	0	0	0	0	1	32677000	3.06026e-08	down
Q5XJE5	Leo1	592	Leo1-592	DEEEEGEESVSLAAIKNRYKGGIREERARIY	0	0	0	0	0	0	0	0	1	0	1	nochange
Q8CFE5	Btbd7	322	Btbd7-322	LRTPTRIILDESIIPKKYAKVILHCMYTDVV	0	0	0	35650000	0	0	0	0	1	35650000	2.80505e-08	down
Q8CFE5	Btbd7	323	Btbd7-323	RTPTRIILDESIIPKKYAKVILHCMYTDVVD	0	0	0	35650000	0	0	0	0	1	35650000	2.80505e-08	down
Q8R4E6	Purg	80	Purg-80	SKRVDIQKKRFYLDVKQSSRGRFLKIAEVWI	0	0	0	359890000	0	0	0	0	1	359890000	2.77863e-09	down
Q99P21	Mutyh	3	Mutyh-3	_____________MKKLQASVRSHKKQPANH	0	0	0	98826000	0	0	0	0	1	98826000	1.01188e-08	down
Q9CYX7	Rrp15	114	Rrp15-114	ILNKKTPKSKATILTKNKELEKEKEKLKQER	0	0	0	0	0	0	0	0	1	0	1	nochange
Q9CYX7	Rrp15	116	Rrp15-116	NKKTPKSKATILTKNKELEKEKEKLKQERLE	0	0	0	0	0	0	0	0	1	0	1	nochange
Q9ER41	Tor1b	132	Tor1b-132	FISQIVAENLYPKGLKSNFVHLFVSTLHFPH	0	0	0	10748000	0	0	0	0	1	10748000	9.30406e-08	down
O88738	Birc6	4541	Birc6-4541	EKKLGEYSKKVVMKPKPLSVLKSLEEKYVAV	0	0	0	43368000	0	0	0	0	1	43368000	2.30585e-08	down
P05480	Src	154	Src-154	VAPSDSIQAEEWYFGKITRRESERLLLNAEN	0	0	0	33479000	0	0	0	0	1	33479000	2.98695e-08	down
Q91Z83	Myh7	611	Myh7-611	KNKDPLNETVVGLYQKSSLKLLSNLFANYAG	0	0	0	45112000	0	0	0	0	1	45112000	2.21671e-08	down
P56399	Usp5	508	Usp5-508	MDAALNKEELLEYEEKKRQAEEEKVPLPELV	0	0	0	21095000	0	0	0	0	1	21095000	4.74046e-08	down
P97348	Rhod	63	Rhod-63	PTVFERYNATLQMKGKPVHLQIWDTAGQDDY	0	0	0	27364000	0	0	0	0	1	27364000	3.65444e-08	down
Q0VF94	Nkpd1	208	Nkpd1-208	SREKFGSQLGFMCEVKKEVELLTDFLCFLEI	0	0	0	23478000	0	0	0	0	1	23478000	4.25931e-08	down
Q32MG2	Cby2	34	Cby2-34	YTWHLTLHSRPNFTRKRDTRSESLEIPVNVI	0	0	0	1257300000	0	0	0	0	1	1257300000	7.95355e-10	down
Q5HZK1	Cep44	255	Cep44-255	LAECQEKLKQLTWIEKRLERLEAATHGKVMV	0	0	0	4352600	0	0	0	0	1	4352600	2.29748e-07	down
Q6PFX7	Nyap1	778	Nyap1-778	PARERDGKLLEVIERKRCVCKEIKARHRPDR	0	0	0	224950000	0	0	0	0	1	224950000	4.44543e-09	down
Q8BTZ4	Anapc5	378	Anapc5-378	SLGIQSLVQQRAFAGKTANKLMDALKDSDLL	0	0	0	15948000	0	0	0	0	1	15948000	6.27038e-08	down
Q8BTZ4	Anapc5	382	Anapc5-382	QSLVQQRAFAGKTANKLMDALKDSDLLHWKH	0	0	0	15948000	0	0	0	0	1	15948000	6.27038e-08	down
Q8C7E7	Stbd1	120	Stbd1-120	VGADWVNAREFVPVGKIPDTHSRADSEAARN	0	0	0	39530000	0	235510000	0	0	2	137520000	7.27167e-09	down
Q8C9J3	Spef2	1346	Spef2-1346	EIYLSQEDFYINGDIKVFPDPSPPTRPPPVE	0	0	0	18224000	0	0	0	0	1	18224000	5.48727e-08	down
Q8CGC7	Eprs1	528	Eprs1-528	KEVVPVNVLDAQEEMKEVARHPKNPDVGLKP	0	0	0	111407000	116870000	36000000	0	0	3	8.80923e+07	1.13517e-08	down
Q8K0L9	Zbtb20	330	Zbtb20-330	PRPVRIQTLVGNIHIKQEMEDDYDYYGQQRV	0	0	0	22899000	0	0	0	0	1	22899000	4.367e-08	down
Q8R4U7	Luzp1	927	Luzp1-927	RHITVRNAWKSKRDLKCSEDPPTGIGRNMEA	0	0	0	40460000	42605000	325318000	0	0	3	1.36128e+08	7.34605e-09	down
Q9CS72	Filip1	464	Filip1-464	CTQLHLNLEKEKNLTKDLLNELEVVKSRVKE	0	0	0	11901000	0	0	0	0	1	11901000	8.40265e-08	down
Q9D1P0	Mrpl13	105	Mrpl13-105	VTAAQLHRKDPVAIVKLAIYGMLPKNLHRRT	0	0	0	908820	0	0	0	0	1	908820	1.10033e-06	down
Q9DBR7	Ppp1r12a	532	Ppp1r12a-532	RESSSLRTSSSYTRRKWEDDLKKNSSINEGS	0	0	0	39485000	0	0	0	0	1	39485000	2.53261e-08	down
Q9QYB8	Add2	699	Add2-699	ESVTSGPLSPEGSPSKSPSKKKKKFRTPSFL	0	0	0	0	0	0	0	0	1	0	1	nochange
Q9WUU9	Mcm3ap	559	Mcm3ap-559	SLLSKSSPVKKPSLLKMHQFEADPFDSGSEG	0	0	0	53366000	0	0	0	0	1	53366000	1.87385e-08	down
O88532	Zfr	815	Zfr-815	LRGDRNVNLVLLCSEKPSKSLLSRIAENLPK	0	0	0	5269700	0	0	0	0	1	5269700	1.89764e-07	down
O89029	Matn4	397	Matn4-397	CREGHVDLVLLVDGSKSVRPQNFELVKRFVN	0	0	0	5140200	0	0	0	0	1	5140200	1.94545e-07	down
P04186	Cfb	413	Cfb-413	VIQDIRALLDIGRDPKNPREDYLDVYVFGVG	0	0	0	0	0	0	0	0	1	0	1	nochange
P23188	Furin	463	Furin-463	RKCIVEILVEPKDIGKRLEVRKAVTACLGEP	0	0	0	25700000	0	0	0	0	1	25700000	3.89105e-08	down
P28867	Prkcd	623	Prkcd-623	LLEKRKVEPPFKPKVKSPSDYSNFDPEFLNE	0	0	0	71240000	0	183460000	0	0	2	127350000	7.85238e-09	down
P56565	S100a1	26	S100a1-26	TLINVFHAHSGQEGDKYKLSKKELKDLLQTE	0	0	0	53352000	0	0	0	0	1	53352000	1.87434e-08	down
P56565	S100a1	28	S100a1-28	INVFHAHSGQEGDKYKLSKKELKDLLQTELS	0	0	0	53352000	0	0	0	0	1	53352000	1.87434e-08	down
P59470	Polr3b	600	Polr3b-600	ISSDGGRLCRPYIIVKKQKPAVTNKHMEELA	0	0	0	17284000	12815000	16724900	0	0	3	1.5608e+07	6.40698e-08	down
P59470	Polr3b	601	Polr3b-601	SSDGGRLCRPYIIVKKQKPAVTNKHMEELAQ	0	0	0	17284000	12815000	16724900	0	0	3	1.5608e+07	6.40698e-08	down
Q3TC72	Fahd2	202	Fahd2-202	VAHDVSARDWQMRNGKQWLLGKTFDTFCPLG	0	0	0	17723000	0	0	0	0	2	8861500	1.12848e-07	down
Q810J8	Zfyve1	278	Zfyve1-278	VIYRTHADRLHNDLFKFLGDASEAYLKHFTK	0	0	0	0	0	0	0	0	1	0	1	nochange
Q8BUZ3	Tigd4	484	Tigd4-484	PSPSKKDALSAVGTLKRFLRSHDLNDELHGS	0	0	0	17907000	0	18341000	0	0	3	1.20827e+07	8.27632e-08	down
Q8CAQ8	Immt	303	Immt-303	DEAADALLKAKEELEKMKTIIEDAKKREIAG	0	0	0	63058000	99959000	0	0	0	2	81508500	1.22687e-08	down
Q8CAQ8	Immt	305	Immt-305	AADALLKAKEELEKMKTIIEDAKKREIAGAT	0	0	0	63058000	99959000	0	0	0	2	81508500	1.22687e-08	down
Q91WS2	Nlrp6	465	Nlrp6-465	ILDHHKAQFSEEDLEKLKLRGSQVQTIFLNK	0	0	0	60621000	21380000	0	0	0	2	41000500	2.43899e-08	down
Q9Z180	Setbp1	638	Setbp1-638	LAQLVPGEDKPMSEMKFHKKVGKLGVLDKKT	0	0	0	11155000	0	0	0	0	1	11155000	8.96459e-08	down
P28661	Septin4	190	Septin4-190	LLGAEERIMQTVEITKHAVDIEEKGVRLRLT	0	0	0	43929000	0	0	0	0	1	43929000	2.2764e-08	down
P62320	Snrpd3	78	Snrpd3-78	IRGSKIRFLILPDMLKNAPMLKSMKNKNQGS	0	0	0	38628000	22791000	52492000	0	0	3	3.79703e+07	2.63363e-08	down
Q6P5D8	Smchd1	564	Smchd1-564	QEQRMKIDREFALWLKDCHEKHDKQIKFTLF	0	0	0	11843000	22570000	46296000	0	0	3	26903000	3.71706e-08	down
Q6URW6	Myh14	1240	Myh14-1240	ALVEMAEQLEQARRGKGVWEKTRLSLEAEVS	0	0	0	0	0	0	0	0	1	0	1	nochange
Q8K0T7	Unc13c	1374	Unc13c-1374	YTCLHENLFHYLTEVKSNGSVKIPEVKGDEA	0	0	0	18128000	0	0	0	0	1	18128000	5.51633e-08	down
Q8K0T7	Unc13c	1385	Unc13c-1385	LTEVKSNGSVKIPEVKGDEAWKVFFDDASQE	0	0	0	18128000	0	0	0	0	1	18128000	5.51633e-08	down
Q91YL3	Uckl1	355	Uckl1-355	IRDKETSRDEFIFYSKRLMRLLIEHALSFLP	0	0	0	3736900	0	0	0	0	1	3736900	2.67601e-07	down
Q99JI4	Psmd6	72	Psmd6-72	LCKSLDWQMDVDLLSKMKKANEEELKRLDEE	0	0	0	15380000	0	0	0	0	1	15380000	6.50195e-08	down
Q99P69	Nuf2	315	Nuf2-315	SQDLADNREKLSSLLKESLNLEDQIESDSSE	0	0	0	231710000	36774000	169280000	0	0	3	1.45921e+08	6.85301e-09	down
O70172	Pip4k2a	252	Pip4k2a-252	DFINEGQKIYIDDNNKKIFLEKLKKDVEFLA	0	0	0	13874000	0	0	0	0	1	13874000	7.20773e-08	down
Q01514	Gbp1	532	Gbp1-532	QKEQSYQEHMKQLTEKMEQERKELMAEQQRI	0	0	0	65942000	0	0	0	0	1	65942000	1.51648e-08	down
Q4KUS2	Unc13a	1385	Unc13a-1385	LFAKICEKTVLKRVLKELWKLVMNTMEKTIV	0	0	0	15140000	0	0	0	0	1	15140000	6.60502e-08	down
Q69ZN7	Myof	1785	Myof-1785	RKAKKYYLRVIIWNTKDVILDEKSITGEDMS	0	0	0	184590000	0	0	0	0	1	184590000	5.41741e-09	down
Q6ZQ38	Cand1	288	Cand1-288	EYCIQAFESFVRRCPKEVYPHVSTIINICLK	0	0	0	11653000	5805600	0	0	0	2	8729300	1.14557e-07	down
Q8CG50	Rab43	116	Rab43-116	RSTFLSVPHWIEDVRKYAGSNIVQLLIGNKS	0	0	0	18706000	0	0	0	0	1	18706000	5.34588e-08	down
Q91WZ8	Dtnbp1	197	Dtnbp1-197	LEMEHTQQLKLKERQKFFEEAFQQDMEQYLS	0	0	0	2675800000	0	0	0	0	1	2675800000	3.7372e-10	down
Q99104	Myo5a	9	Myo5a-9	_______MAASELYTKFARVWIPDPEEVWKS	0	0	0	95779000	0	0	0	0	1	95779000	1.04407e-08	down
P68500	Cntn5	271	Cntn5-271	SKVQTSDVGSYICLVKNAVTNARVLSPPTPL	0	0	0	134103000	0	12780000	0	0	2	73441500	1.36163e-08	down
P97501	Fmo3	98	Fmo3-98	HHSKLQEYITSFAKEKNLLKYIQFETPVTSI	0	0	0	37934000	0	0	0	0	1	37934000	2.63616e-08	down
Q3TYD6	Lmtk2	861	Lmtk2-861	TLDGGNRPPDVTCQSKEALSLTNRHPILVND	0	0	0	101150000	69376000	128000000	0	0	3	9.95087e+07	1.00494e-08	down
Q8K3J1	Ndufs8	90	Ndufs8-90	SYLFREPATINYPFEKGPLSPRFRGEHALRR	0	0	0	19195000	0	0	0	0	1	19195000	5.20969e-08	down
Q6PFX7	Nyap1	770	Nyap1-770	LPLPLPPQPARERDGKLLEVIERKRCVCKEI	0	0	0	224950000	0	0	0	0	1	224950000	4.44543e-09	down
Q91VM3	Wdr45	165	Wdr45-165	LCPSLEKQLLVFPGHKCGSLQLVDLASTKPG	0	0	0	0	0	0	0	0	2	0	1	nochange
Q920Q4	Vps16	492	Vps16-492	EVQGVSRILAHWACYKARAWDMRDEDVARAI	0	0	0	44114000	0	0	0	0	1	44114000	2.26685e-08	down
Q9QYB8	Add2	703	Add2-703	SGPLSPEGSPSKSPSKKKKKFRTPSFLKKSK	0	0	0	0	0	0	0	0	1	0	1	nochange
Q9WUU9	Mcm3ap	554	Mcm3ap-554	RPAAGSLLSKSSPVKKPSLLKMHQFEADPFD	0	0	0	53366000	0	0	0	0	1	53366000	1.87385e-08	down
P56565	S100a1	31	S100a1-31	FHAHSGQEGDKYKLSKKELKDLLQTELSGFL	0	0	0	53352000	0	0	0	0	1	53352000	1.87434e-08	down
Q3TLH4	Prrc2c	479	Prrc2c-479	RKRREEEERRMEEQRKAACAEKLKQLDEKLG	0	0	0	132760000	0	0	0	0	1	132760000	7.53239e-09	down
Q3V0A6	Gm5592	624	Gm5592-624	TTTVLNMPCEGQFPPKSPGKVQRAESSIDKD	0	0	0	78220000	48056000	0	0	0	2	63138000	1.58383e-08	down
Q61789	Lama3	2255	Lama3-2255	ALNSLQQTLKTVSVQKDLLDANLTVARDDLH	0	0	0	17158000	12950900	11521000	0	0	3	1.38766e+07	7.20636e-08	down
Q6NWW9	Fndc3b	641	Fndc3b-641	VAYSGSATEYVFTHLKPGTLYKLRACCISTG	0	0	0	4217400	0	0	0	0	1	4217400	2.37113e-07	down
Q7TPE5	Slc7a6os	28	Slc7a6os-28	RKRNAEPAEALVLACKRPRSSEVESAARETP	0	0	0	23409000	0	0	0	0	1	23409000	4.27186e-08	down
Q8BRG6	Klhl24	75	Klhl24-75	RDSRLFTDVIICVEGKEFPCHRAVLSACSSY	0	0	0	0	0	0	0	0	1	0	1	nochange
Q9D952	Evpl	1234	Evpl-1234	QETGSKKSGVEQEVEKLLPELEVLRAQKPVV	0	0	0	163430000	0	0	0	0	1	163430000	6.11883e-09	down
Q9Z2I9	Sucla2	274	Sucla2-274	PMVEDSDGKVLCMDAKINFDSNSAYRQKKIF	0	0	0	52114000	0	0	0	0	1	52114000	1.91887e-08	down
O08582	Gtpbp1	377	Gtpbp1-377	IFQISNVTGENLDLLKMFLNLLSPRTSYREE	0	0	0	14023000	0	0	0	0	1	14023000	7.13114e-08	down
Q64449	Mrc2	1287	Mrc2-1287	REHCYSFHMEVLLGHKEALQRCQKAGGTVLS	0	0	0	11348000	0	0	0	0	1	11348000	8.81212e-08	down
Q6ZQ12	Ninl	1386	Ninl-1386	CVLEEKVRALNKLISKMAPASLSV_______	0	0	0	61320000	0	0	0	0	1	61320000	1.63079e-08	down
Q9ES00	Ube4b	1067	Ube4b-1067	ELFEEVISKMRKAGIKSTIAIEKFKLLAEKV	0	0	0	13871000	0	0	0	0	1	13871000	7.20929e-08	down
Q9Z211	Pex11a	44	Pex11a-44	RYLLESKADKEAVVLKLKRLETSVSTGRKWF	0	0	0	74683000	115940000	35624000	0	0	3	7.54157e+07	1.32598e-08	down
Q9Z211	Pex11a	46	Pex11a-46	LLESKADKEAVVLKLKRLETSVSTGRKWFRL	0	0	0	74683000	115940000	35624000	0	0	3	7.54157e+07	1.32598e-08	down
Q9DBR0	Akap8	514	Akap8-514	VDHNHNRRLAAEQFKKTSLHVAKSVLNNKHI	0	0	0	33784000	0	0	0	0	1	33784000	2.95998e-08	down
Q9DBR0	Akap8	521	Akap8-521	RLAAEQFKKTSLHVAKSVLNNKHIVKMLEKY	0	0	0	33784000	0	0	0	0	1	33784000	2.95998e-08	down
A2AJI0	Map7d1	440	Map7d1-440	ENEKEKSALARERNLKKRQSLPASIRPRLST	0	0	0	726570000	0	160350000	0	0	2	443460000	2.25499e-09	down
A2AJI0	Map7d1	441	Map7d1-441	NEKEKSALARERNLKKRQSLPASIRPRLSTG	0	0	0	726570000	0	160350000	0	0	2	443460000	2.25499e-09	down
A6X935	Itih4	828	Itih4-828	LVVTRGRKNTEYKWKKTLFSVLPGLKMTMNM	0	0	0	11770000	0	0	0	0	1	11770000	8.49618e-08	down
Q01514	Gbp1	527	Gbp1-527	EMLMEQKEQSYQEHMKQLTEKMEQERKELMA	0	0	0	65942000	0	0	0	0	1	65942000	1.51648e-08	down
Q569Z5	Ddx46	186	Ddx46-186	REEQRKKAMENIGELKKEIEEMKQGKKWSLE	0	0	0	1278200000	0	0	0	0	1	1278200000	7.8235e-10	down
Q569Z5	Ddx46	187	Ddx46-187	EEQRKKAMENIGELKKEIEEMKQGKKWSLED	0	0	0	1278200000	0	0	0	0	1	1278200000	7.8235e-10	down
Q69ZS0	Pdzrn3	1001	Pdzrn3-1001	RRRREFMMQSRLDCLKEQQASDDRKEMNILE	0	0	0	100110000	0	0	0	0	1	100110000	9.98901e-09	down
Q6ZQL4	Wdr43	181	Wdr43-181	GDNSSVSSLCISPDGKMLLSAGRTIKLWVLE	0	0	0	0	0	0	0	0	2	0	1	nochange
Q8BVV7	Cep95	356	Cep95-356	ENRAAIPSEHLPFSQKARKPLTEQELHAMSE	0	0	0	18233000	0	0	0	0	1	18233000	5.48456e-08	down
Q8BZ60	Ston2	285	Ston2-285	SFKRDRPKSTLMNLPKVQKLDISSLNRPPSV	0	0	0	75400000	0	0	0	0	1	75400000	1.32626e-08	down
Q8QZX2	Haus3	69	Haus3-69	SEKELEAFSDLQRSGKPILEGTALDEVLRTC	0	0	0	185390000	0	0	0	0	1	185390000	5.39403e-09	down
Q8VCE9	Plekhh3	310	Plekhh3-310	RDLPALQDELFLQLAKQTSGPAGPPGLPATQ	0	0	0	8523000	0	0	0	0	1	8523000	1.1733e-07	down
Q99K48	Nono	245	Nono-245	DQLDDEEGLPEKLVIKNQQFHKEREQPPRFA	0	0	0	15379000	44685200	4951300	0	0	3	2.16718e+07	4.61428e-08	down
Q99K48	Nono	251	Nono-251	EGLPEKLVIKNQQFHKEREQPPRFAQPGSFE	0	0	0	15379000	44685200	4951300	0	0	3	2.16718e+07	4.61428e-08	down
Q9CQG2	Mettl16	509	Mettl16-509	EKGDRLDGAAGRYLFKCLVNIKKEAGDAVVE	0	0	0	139320000	0	0	0	0	1	139320000	7.17772e-09	down
Q9CQG2	Mettl16	516	Mettl16-516	GAAGRYLFKCLVNIKKEAGDAVVEMHWVEGQ	0	0	0	139320000	0	0	0	0	1	139320000	7.17772e-09	down
Q9D8X1	Cutc	253	Cutc-253	SVAMGASLAHSEYSLKVTDVTKVRTLNAIAK	0	0	0	21619000	0	0	0	0	1	21619000	4.62556e-08	down
Q9QYB2	Dach1	673	Dach1-673	EKQLAMEQKNRAIVQKRLKKEKKAKRKLQEA	0	0	0	7024800	0	0	0	0	1	7024800	1.42353e-07	down
Q9QYB2	Dach1	676	Dach1-676	LAMEQKNRAIVQKRLKKEKKAKRKLQEALEF	0	0	0	7024800	0	0	0	0	1	7024800	1.42353e-07	down
Q9QYB2	Dach1	677	Dach1-677	AMEQKNRAIVQKRLKKEKKAKRKLQEALEFE	0	0	0	7024800	0	0	0	0	1	7024800	1.42353e-07	down
E9PZJ8	Ascc3	2132	Ascc3-2132	FLILGEVDKRELMAVKRVGFVRTHHDASISF	0	0	0	16997000	15372000	24422000	0	0	3	1.89303e+07	5.28253e-08	down
P14685	Psmd3	321	Psmd3-321	TNALRKAPQHTAVGFKQTVHKLLIVVELLLG	0	0	0	21124000	0	0	0	0	1	21124000	4.73395e-08	down
P61364	Ostn	58	Ostn-58	PPTAREEKSATELSAKLLRLDDLVSLENDVF	0	0	0	19486000	0	4924800	0	0	2	12205400	8.19309e-08	down
Q2EMV9	Parp14	1538	Parp14-1538	ARDEIEGMIKSIRLAKEKESQADYISTYVEW	0	0	0	13137000	0	0	0	0	1	13137000	7.61209e-08	down
Q3V1H1	Ckap2	6	Ckap2-6	__________MAESRKRFLGRAARNPLPVTR	0	0	0	36782000	0	0	0	0	1	36782000	2.71872e-08	down
Q80TS5	Znf423	397	Znf423-397	SSASVERGSTPDSTLKPLRGQKKMRDDGQSW	0	0	0	44443000	0	0	0	0	1	44443000	2.25007e-08	down
Q80TS5	Znf423	403	Znf423-403	RGSTPDSTLKPLRGQKKMRDDGQSWPKVVYS	0	0	0	44443000	0	0	0	0	1	44443000	2.25007e-08	down
Q8BSU7	Mob3a	109	Mob3a-109	GPKYEYRWQDEQRFRKPTALSAPRYMDLLMD	0	0	0	74997000	0	0	0	0	1	74997000	1.33339e-08	down
Q8VIM5	Myocd	258	Myocd-258	KNRHKKPKDPKPKVKKLKYHQYIPPDQKAEK	0	0	0	423970000	0	0	0	0	1	423970000	2.35866e-09	down
Q8VIM5	Myocd	260	Myocd-260	RHKKPKDPKPKVKKLKYHQYIPPDQKAEKSP	0	0	0	423970000	0	0	0	0	1	423970000	2.35866e-09	down
Q9CWL2	Casz1	207	Casz1-207	DQNTRDELAKKISFEKPHAGSTPEVAASSML	0	0	0	109450000	0	0	0	0	1	109450000	9.13659e-09	down
Q9CZU6	Cs	208	Cs-208	KYWELIYEDCMDLIAKLPCVAAKIYRNLYRE	0	0	0	78023000	0	0	0	0	1	78023000	1.28167e-08	down
Q9EQ09	Olr1	356	Olr1-356	VFAENCILIAFSICQKKTNHLQI________	0	0	0	14070000	0	0	0	0	1	14070000	7.10732e-08	down
Q9EQ09	Olr1	357	Olr1-357	FAENCILIAFSICQKKTNHLQI_________	0	0	0	14070000	0	0	0	0	1	14070000	7.10732e-08	down
Q9JJG9	Noa1	595	Noa1-595	EKHAGHELLLVPMGGKERMAQFPPLVAEDIT	0	0	0	3755500	0	0	0	0	1	3755500	2.66276e-07	down
A2ASS6	Ttn	32313	Ttn-32313	NETGLSRPRRTAMSVKTKLTSGEAPGVRKEM	0	0	0	40877000	54860000	0	0	0	2	47868500	2.08906e-08	down
A2ASS6	Ttn	32315	Ttn-32315	TGLSRPRRTAMSVKTKLTSGEAPGVRKEMAD	0	0	0	40877000	54860000	0	0	0	2	47868500	2.08906e-08	down
P56399	Usp5	509	Usp5-509	DAALNKEELLEYEEKKRQAEEEKVPLPELVR	0	0	0	21095000	0	0	0	0	1	21095000	4.74046e-08	down
P59108	Cpne2	100	Cpne2-100	FEEVQKLKFALFDQDKSSAQLDEHDFLGQFS	0	0	0	18873000	0	0	0	0	1	18873000	5.29857e-08	down
P97348	Rhod	61	Rhod-61	YSPTVFERYNATLQMKGKPVHLQIWDTAGQD	0	0	0	27364000	0	0	0	0	1	27364000	3.65444e-08	down
Q0VF94	Nkpd1	209	Nkpd1-209	REKFGSQLGFMCEVKKEVELLTDFLCFLEIY	0	0	0	23478000	0	0	0	0	1	23478000	4.25931e-08	down
Q14AT2	Tex11	252	Tex11-252	IGKMDRRSVEPQMLAKTLRLLATIYLNCGGE	0	0	0	0	0	0	0	0	1	0	1	nochange
Q3UHQ6	Dop1b	1788	Dop1b-1788	IPDLQEAFPSLLGVLKEAAQLNLAPPGYFLL	0	0	0	5949900	0	0	0	0	1	5949900	1.6807e-07	down
Q5IXF8	Glp2r	325	Glp2r-325	LLCVTVNFFIFLKILKLLISKFRAHQMCFRD	0	0	0	13404000	0	0	0	0	1	13404000	7.46046e-08	down
Q5IXF8	Glp2r	330	Glp2r-330	VNFFIFLKILKLLISKFRAHQMCFRDYKYRL	0	0	0	13404000	0	0	0	0	1	13404000	7.46046e-08	down
Q8CDC7	Zbtb9	46	Zbtb9-46	SSSLLESLNRHRLEGKFCDVSLLVQGRELRA	0	0	0	0	0	0	0	0	1	0	1	nochange
Q99NH2	Pard3	36	Pard3-36	MKVFSLIQQAVTRYRKAVAKDPNYWIQVHRL	0	0	0	0	0	0	0	0	1	0	1	nochange
Q99PP2	Znf318	1010	Znf318-1010	ELDKVAQILGIDIFDKSLKSSNDSKESTEKP	0	0	0	0	0	7839500	0	0	2	3919750	2.55118e-07	down
Q9CXW4	Rpl11	118	Rpl11-118	GNFGFGIQEHIDLGIKYDPSIGIYGLDFYVV	0	0	0	0	0	0	0	0	1	0	1	nochange
Q9QXS1	Plec	940	Plec-940	HLSGLAKRAKAIVQLKPRNPAHPVRGHVPLI	0	0	0	30016000	22988000	0	0	0	2	26502000	3.7733e-08	down
Q9WVC8	Slc26a3	716	Slc26a3-716	IFFLTIHDAILHILMKKDYSTSKFNSSQEKE	0	0	0	0	0	96867000	0	0	2	48433500	2.06469e-08	down
E9Q6J5	Bod1l	1354	Bod1l-1354	GSKEGNDGFTVDMPTKANGGSKRHLSEDSQA	0	0	0	9729900	10100000	0	0	0	2	9914950	1.00858e-07	down
P23188	Furin	459	Furin-459	VAPQRKCIVEILVEPKDIGKRLEVRKAVTAC	0	0	0	25700000	0	0	0	0	1	25700000	3.89105e-08	down
P26955	Csf2rb	381	Csf2rb-381	KMAYSFIEHTFQVQYKKKSDSWEDSKTENLD	0	0	0	55435000	0	155276000	0	0	2	105355500	9.49167e-09	down
P26955	Csf2rb	382	Csf2rb-382	MAYSFIEHTFQVQYKKKSDSWEDSKTENLDR	0	0	0	55435000	0	155276000	0	0	2	105355500	9.49167e-09	down
P26955	Csf2rb	383	Csf2rb-383	AYSFIEHTFQVQYKKKSDSWEDSKTENLDRA	0	0	0	55435000	0	155276000	0	0	2	105355500	9.49167e-09	down
P47226	Tes	83	Tes-83	VGRLFEDTKYTTLIAKLKSDGIPMYKRNVMI	0	0	0	16030000	0	0	0	0	2	8015000	1.24766e-07	down
P47226	Tes	85	Tes-85	RLFEDTKYTTLIAKLKSDGIPMYKRNVMILT	0	0	0	16030000	0	0	0	0	2	8015000	1.24766e-07	down
P58069	Rasa2	627	Rasa2-627	KRAQGRTRIGKKNFKKRWFCLTSRELTYHRQ	0	0	0	2177900	0	0	0	0	1	2177900	4.59158e-07	down
Q60634	Flot2	342	Flot2-342	AAVIEAMGKAEAERMKLKAEAYQKYGDAAKM	0	0	0	49446000	0	0	0	0	1	49446000	2.02241e-08	down
Q68FL4	Ahcyl2	329	Ahcyl2-329	GDLTHWIYKKYPNMFKKIKGIVEESVTGVHR	0	0	0	0	0	0	0	0	1	0	1	nochange
Q8BG54	Sptlc3	535	Sptlc3-535	VDELGDLLNVKYFPLKKSGRAILYNKEGFDN	0	0	0	16230000	0	7698800	0	0	2	11964400	8.35813e-08	down
Q8BG54	Sptlc3	536	Sptlc3-536	DELGDLLNVKYFPLKKSGRAILYNKEGFDNE	0	0	0	16230000	0	7698800	0	0	2	11964400	8.35813e-08	down
Q8CI96	Clip4	351	Clip4-351	CAPKYGIFAPLSKISKLKDGRKTTTHTPSTR	0	0	0	91106000	0	0	0	0	1	91106000	1.09762e-08	down
Q8CI96	Clip4	353	Clip4-353	PKYGIFAPLSKISKLKDGRKTTTHTPSTRAT	0	0	0	91106000	0	0	0	0	1	91106000	1.09762e-08	down
Q9D9U9	Cfap45	407	Cfap45-407	KRNQEVADREWRRKEKENAQKKIETEEKLRK	0	0	0	782550000	0	0	0	0	1	782550000	1.27787e-09	down
E9Q414	Apob	434	Apob-434	PNPSTQRLQEIFNTAKEQQSRATLYALSHAV	0	0	0	5528100	0	0	0	0	1	5528100	1.80894e-07	down
O89033	Cdc6	58	Cdc6-58	TTPCVDVKLLPLSPRKRLGDDNLCNTPRLSP	0	0	0	2702300	0	0	0	0	1	2702300	3.70055e-07	down
Q5K2P8	Prss36	150	Prss36-150	ELGADLALLRLASPAKLGPSVKPVCLPRASH	0	0	0	0	0	0	0	0	1	0	1	nochange
Q7TSK7	Adamtsl2	202	Adamtsl2-202	PIGCDGVLFSTHTLDKCGVCQGDGSSCTHVT	0	0	0	314330000	0	0	0	0	1	314330000	3.18137e-09	down
Q8BR70	Yipf6	72	Yipf6-72	SIRRTIMRDLKAVGRKFMHVLYPRKSNALLR	0	0	0	307850000	0	0	0	0	1	307850000	3.24834e-09	down
Q8C1A3	Mtrr	379	Mtrr-379	LQFILTWCLEIRAVPKKAFLRALAEHTSSAT	0	0	0	23401000	0	0	0	0	1	23401000	4.27332e-08	down
Q8C1A3	Mtrr	380	Mtrr-380	QFILTWCLEIRAVPKKAFLRALAEHTSSATE	0	0	0	23401000	0	0	0	0	1	23401000	4.27332e-08	down
Q8K0T7	Unc13c	1380	Unc13c-1380	NLFHYLTEVKSNGSVKIPEVKGDEAWKVFFD	0	0	0	18128000	0	0	0	0	1	18128000	5.51633e-08	down
Q8VEA8	Rab7b	195	Rab7b-195	ENHLIDSIKLSPGQPKSRCC___________	0	0	0	20794000	0	0	0	0	1	20794000	4.80908e-08	down
Q9Z280	Pld1	601	Pld1-601	YFSHCRSHQNLIHGLKPHLKLFHPSSESEQG	0	0	0	0	0	0	0	0	2	0	1	nochange
Q8BWD8	Cdk19	322	Cdk19-322	KVFLLLQKLLTMDPTKRITSEQALQDPYFQE	0	0	0	0	19564000	0	0	0	1	19564000	5.11143e-08	down
Q9D5U8	Cnbd2	312	Cnbd2-312	ETEFLVVDREDFVANKLGDEVQKETQYRYNF	0	0	0	0	0	0	0	0	1	0	1	nochange
Q9D8C3	Alg13	578	Alg13-578	TGGYFPEIVMTDMNMKQRKKMFKKFRGKEIY	0	0	0	0	1684200	0	0	0	1	1684200	5.93753e-07	down
E9Q5M6	Cfap44	342	Cfap44-342	GSEWGNLLLWEGSLIKVELCRTGMKSCHSGS	0	0	0	0	0	0	0	0	1	0	1	nochange
P30415	Nktr	983	Nktr-983	QKQKHSKDDLKGDHTKRAREKSKAKKDKKHK	0	0	0	0	580310000	0	0	0	1	580310000	1.72322e-09	down
P55200	Kmt2a	269	Kmt2a-269	VKRTPSAMFQQATKIKKLRAGKLSPLKSKFK	0	0	0	0	0	0	0	0	1	0	1	nochange
P55200	Kmt2a	270	Kmt2a-270	KRTPSAMFQQATKIKKLRAGKLSPLKSKFKT	0	0	0	0	0	0	0	0	1	0	1	nochange
P70270	Rad54l	515	Rad54l-515	VLDYILAVTRSRSSDKVVLVSNYTQTLDLFE	0	0	0	0	17838000	0	0	0	1	17838000	5.60601e-08	down
Q60665	Skil	464	Skil-464	SYPDVSLEEQEKMDLKTSRELYSCLDSSISN	0	0	0	0	4393700	0	0	0	1	4393700	2.27599e-07	down
Q62130	Ptpn14	300	Ptpn14-300	IENAKYISRLFTTRHKFYKQNKICTEQSNSP	0	0	0	0	0	0	0	0	1	0	1	nochange
Q68EF8	Rapgefl1	9	Rapgefl1-9	_______MKPLEKFLKKQTSQLAGRAVTGGP	0	0	0	0	3576700	0	0	0	1	3576700	2.79587e-07	down
Q6PDK2	Kmt2d	3542	Kmt2d-3542	EQIGVHRKSRKALCAKQRTAKKAGREFPEAD	0	0	0	0	0	0	0	0	1	0	1	nochange
Q8BL66	Eea1	1084	Eea1-1084	QIGNQNKSIQELQAAKASLEQDSAKKEALLK	0	0	0	0	50839000	0	0	0	1	50839000	1.96699e-08	down
Q8BWD2	Ip6k3	257	Ip6k3-257	LGVRICGMQVYQTDQKSFLCKDKYYGRKLSV	0	0	0	0	4380300	0	0	0	1	4380300	2.28295e-07	down
Q9D4G2	Hsf2bp	26	Hsf2bp-26	TEEACRNMESKEEFVKVRKKDLERLTTEVMQ	0	0	0	0	0	0	0	0	1	0	1	nochange
O55201	Supt5h	1078	Supt5h-1078	LEDQQIKILNLRFLGKLLEA___________	0	0	0	0	4824800	4087100	0	0	2	4455950	2.24419e-07	down
O88741	Gdap1	285	Gdap1-285	HGKRPNLETYYERVLKRKTFNKVLGHVNNIL	0	0	0	0	0	0	0	0	1	0	1	nochange
O88974	Setdb1	962	Setdb1-962	QTRGQKENELSEMTSKDSRPPDLGPPHVPIP	0	0	0	0	63795000	0	0	0	1	63795000	1.56752e-08	down
P04212	Tvb4	105	Tvb4-105	REKKSSFSLTVTSAQKNEMTVFLCASSIRLA	0	0	0	0	0	0	0	0	1	0	1	nochange
Q01514	Gbp1	483	Gbp1-483	DLADTLLKMDQSLTEKEKQIEMERIKAEAAE	0	0	0	0	60046000	0	0	0	1	60046000	1.66539e-08	down
Q5STT6	Garin3	630	Garin3-630	SCDRGGVDIVTKLVEKKQDIEAVMEKSKDSE	0	0	0	0	34779000	0	0	0	1	34779000	2.8753e-08	down
Q5STT6	Garin3	631	Garin3-631	CDRGGVDIVTKLVEKKQDIEAVMEKSKDSEF	0	0	0	0	34779000	0	0	0	1	34779000	2.8753e-08	down
Q61143	Trpc6	747	Trpc6-747	EIEDDADVEWKFARAKLWFSYFEEGRTLPVP	0	0	0	0	0	0	0	0	1	0	1	nochange
Q6P3D0	Nudt16	190	Nudt16-190	LQDLKLLDPGIIAKLKIPDSK__________	0	0	0	0	16701000	0	0	0	1	16701000	5.98767e-08	down
Q6PR54	Rif1	1466	Rif1-1466	QKLTDESPIQENLTEKGNTLPERTSGEPSVN	0	0	0	0	14610000	0	0	0	1	14610000	6.84463e-08	down
Q80U16	Ripor2	1065	Ripor2-1065	RLAYEQLDKFPRDCVKVGGRHGTEVATAF__	0	0	0	0	83491000	0	0	0	1	83491000	1.19773e-08	down
Q8BFR4	Gns	494	Gns-494	QITNIAKSIDPELLGKMNYRLMMLQSCSGPT	0	0	0	0	15035000	0	0	0	1	15035000	6.65115e-08	down
Q8C1E7	Tmem120a	66	Tmem120a-66	ITRQKKRLQELALVLKKCRPSLPSESMEAAQ	0	0	0	0	10894000	0	0	0	1	10894000	9.17936e-08	down
Q8C1E7	Tmem120a	67	Tmem120a-67	TRQKKRLQELALVLKKCRPSLPSESMEAAQE	0	0	0	0	10894000	0	0	0	1	10894000	9.17936e-08	down
Q8CIS0	Card11	350	Card11-350	ELRDKYLEEKEDLELKCSTLGKDCEMYKHRM	0	0	0	0	5960000	0	0	0	1	5960000	1.67785e-07	down
Q8CIS0	Card11	356	Card11-356	LEEKEDLELKCSTLGKDCEMYKHRMNTVMLQ	0	0	0	0	5960000	0	0	0	1	5960000	1.67785e-07	down
Q99PF4	Cdh23	2958	Cdh23-2958	TAIIGIYILRDDQRVKIVINEIPDRVRGFEE	0	0	0	0	0	0	0	0	1	0	1	nochange
Q9D478	Odf2l	375	Odf2l-375	VASVENELVELQEVEKRQKTLVEGYRTQVQK	0	0	0	0	62980000	0	0	0	1	62980000	1.58781e-08	down
Q9D478	Odf2l	378	Odf2l-378	VENELVELQEVEKRQKTLVEGYRTQVQKLQE	0	0	0	0	62980000	0	0	0	1	62980000	1.58781e-08	down
A2AEY4	Map7d3	138	Map7d3-138	EEKRKQKQAEDTEKFKAVVSRTLERCNRIDQ	0	0	0	0	43047000	0	0	0	1	43047000	2.32304e-08	down
O55017	Cacna1b	1836	Cacna1b-1836	ANLPQKTLDLLVPPHKPDEMTVGKVYAALMI	0	0	0	0	0	0	0	0	1	0	1	nochange
P16054	Prkce	644	Prkce-644	WLSKEAVSILKAFMTKNPHKRLGCVAAQNGE	0	0	0	0	7093100	12780000	0	0	2	9936550	1.00639e-07	down
P16054	Prkce	648	Prkce-648	EAVSILKAFMTKNPHKRLGCVAAQNGEDAIK	0	0	0	0	7093100	12780000	0	0	2	9936550	1.00639e-07	down
Q05AA6	Drp2	846	Drp2-846	RNEELLAEARILRQHKSRLETRMQILEDHNK	0	0	0	0	68094000	0	0	0	1	68094000	1.46856e-08	down
Q60675	Lama2	1936	Lama2-1936	FRAYSNIKDYIDEAEKVAREAKELAQGATKL	0	0	0	0	51276000	0	0	0	1	51276000	1.95023e-08	down
Q61666	Hira	447	Hira-447	VVNGESLEDIRKNLLKKQVETRTADGRRRIT	0	0	0	0	44846000	43078000	0	0	2	43962000	2.27469e-08	down
Q8BGX2	Timm29	248	Timm29-248	VDQALWEEQVLQKERKDRLALSEADSLVQSD	0	0	0	0	143440000	0	0	0	1	143440000	6.97156e-09	down
Q9CZU3	Mtrex	831	Mtrex-831	VYTLCERKAQIALDIKSAKRELKKARTVLQM	0	0	0	0	1023500000	259180000	0	0	2	641340000	1.55924e-09	down
Q9D0U1	Dtwd2	277	Dtwd2-277	IRLSKEYLLRNGLYPKPMPKNKRKLRKMELL	0	0	0	0	11568000	0	0	0	1	11568000	8.64454e-08	down
Q9D6A1	Myo1h	531	Myo1h-531	KGFLEKNNDLLYRHLKEVLCSSKNSILRECF	0	0	0	0	0	0	0	0	1	0	1	nochange
Q9WTM3	Sema6c	117	Sema6c-117	LTWRSQDMENCAVRGKLTDECYNYIRVLVPW	0	0	0	0	17756000	0	0	0	1	17756000	5.6319e-08	down
A2AU72	Armc3	607	Armc3-607	LQELNDQRAILLVNNKSDTSPPPSMEDKSSD	0	0	0	0	0	0	0	0	1	0	1	nochange
E9PZQ0	Ryr1	3337	Ryr1-3337	RIIVNNLGIDEASWMKRLAVFAQPIVSRARP	0	0	0	0	81362000	0	0	0	1	81362000	1.22907e-08	down
O35239	Ptpn9	55	Ptpn9-55	SPLSWNVAVKFLMARKFDVLRAVELFHCYRE	0	0	0	0	20400000	0	0	0	1	20400000	4.90196e-08	down
O35639	Anxa3	39	Anxa3-39	AEAIRKAIRGLGTDEKTLINILTERSNAQRQ	0	0	0	0	0	0	0	0	1	0	1	nochange
P14431	H2-Q9	152	H2-Q9-152	FAYEGRDYIALNEDLKTWTAVDMAAQITRRK	0	0	0	0	0	0	0	0	1	0	1	nochange
Q3URK3	Tet1	1408	Tet1-1408	SVAAVRELMETRFGQKGKAIRIEKIVFTGKE	0	0	0	0	2364200	0	0	0	2	1182100	8.45951e-07	down
Q3URK3	Tet1	1410	Tet1-1410	AAVRELMETRFGQKGKAIRIEKIVFTGKEGK	0	0	0	0	2364200	0	0	0	2	1182100	8.45951e-07	down
Q8BSE0	Rmdn2	185	Rmdn2-185	LNTHIEELKLDVLLQKADHLRTNESHKMESF	0	0	0	0	0	0	0	0	1	0	1	nochange
Q8C5N3	Cwc22	446	Cwc22-446	EGEDEEGGQKVTIHDKTEINLVSFRRTIYLA	0	0	0	0	19959000	0	0	0	1	19959000	5.01027e-08	down
Q8CC88	Vwa8	213	Vwa8-213	QLEDGRFLMSAERYDKLLQDHTKEELDAWKI	0	0	0	0	327810000	0	0	0	1	327810000	3.05055e-09	down
Q99ML9	Rnf111	237	Rnf111-237	QRTQKQKERMLVQRKKREALAQRKYALLSSS	0	0	0	0	0	0	0	0	1	0	1	nochange
Q9WUF3	Casp8ap2	1667	Casp8ap2-1667	HSLDNHLPDTHIDLTKDSATETKSLGELMEV	0	0	0	0	0	0	0	0	1	0	1	nochange
B2RY83	Hpse2	99	Hpse2-99	DPSIIHDGWLDFLSSKRLVTLARGLSPAFLR	0	0	0	0	0	0	0	0	1	0	1	nochange
O35454	Clcn6	674	Clcn6-674	KFKKSSILTRAGEQRKRGQSMKSYPSSELRN	0	0	0	0	73171000	0	0	0	1	73171000	1.36666e-08	down
Q99JI4	Psmd6	74	Psmd6-74	KSLDWQMDVDLLSKMKKANEEELKRLDEELE	0	0	0	0	14692000	0	0	0	1	14692000	6.80642e-08	down
Q99JI4	Psmd6	75	Psmd6-75	SLDWQMDVDLLSKMKKANEEELKRLDEELED	0	0	0	0	14692000	0	0	0	1	14692000	6.80642e-08	down
Q9D0M3	Cyc1	291	Cyc1-291	WASEPEHDHRKRMGLKMLLMMGLLLPLTYAM	0	0	0	0	0	0	0	0	1	0	1	nochange
Q9WVQ0	Pmfbp1	15	Pmfbp1-15	_MLKLKGELRTAKGLKNEAGERDRDVSNLNS	0	0	0	0	4438400	0	0	0	1	4438400	2.25306e-07	down
Q8R1F1	Niban2	220	Niban2-220	EGPAFTDAIRMYRQSKEQYGTWEMLCGNEVQ	0	0	0	0	19619000	0	0	0	1	19619000	5.0971e-08	down
O88888	Apba3	221	Apba3-221	PCGPEELMDGVIFGAKYLGSTQLLSERSPAP	0	0	0	0	33673000	0	0	0	1	33673000	2.96974e-08	down
P63038	Hspd1	191	Hspd1-191	ANGDKDIGNIISDAMKKVGRKGVITVKDGKT	0	0	0	0	0	0	0	0	1	0	1	nochange
P97499	Tep1	2405	Tep1-2405	QSLILMKEDVELLEMKPGSIPSSICRRYGVH	0	0	0	0	110300000	0	0	0	1	110300000	9.06618e-09	down
Q76LL6	Fhod3	1120	Fhod3-1120	TAADGKRQEIIVLDSKRSNAINIGLTVLPPP	0	0	0	0	4972100	0	0	0	1	4972100	2.01122e-07	down
Q9ERZ4	Chrm2	259	Chrm2-259	NNNNMPGGDGGLEHNKIQNGKAPRDGGTENC	0	0	0	0	0	0	0	0	1	0	1	nochange
Q9R229	Bmp10	248	Bmp10-248	DTGRGQLEIDMSAQNKHDPLLVVFSDDQSND	0	0	0	0	31127000	0	0	0	1	31127000	3.21264e-08	down
B1AWN6	Scn2a	643	Scn2a-643	ASRASRGIPTLPMNGKMHSAVDCNGVVSLVG	0	0	0	0	25733500	0	0	0	1	25733500	3.88599e-08	down
O08848	RO60	495	RO60-495	AVALREYRKKMDIPAKLIVCGMTSNGFTIAD	0	0	0	0	47040000	0	0	0	1	47040000	2.12585e-08	down
P19785	Esr1	175	Esr1-175	NRRQNGRERLSSSNEKGNMIMESAKETRYCA	0	0	0	0	20379000	0	0	0	1	20379000	4.90701e-08	down
Q61666	Hira	448	Hira-448	VNGESLEDIRKNLLKKQVETRTADGRRRITP	0	0	0	0	44846000	43078000	0	0	2	43962000	2.27469e-08	down
Q7TSY8	Sgo2	867	Sgo2-867	CEDIKSCDFGEINSNKKENYDPIQDPCTLVK	0	0	0	0	168600000	0	0	0	1	168600000	5.9312e-09	down
Q7TSY8	Sgo2	868	Sgo2-868	EDIKSCDFGEINSNKKENYDPIQDPCTLVKK	0	0	0	0	168600000	0	0	0	1	168600000	5.9312e-09	down
Q8K007	Sulf1	417	Sulf1-417	KKAKIWRDTFLVERGKFLRKKEESGKNIQQS	0	0	0	0	35137000	0	0	0	1	35137000	2.846e-08	down
Q4VAA7	Snx33	345	Snx33-345	QHFLSCLDDKQWKMGKRRAEKDEMVGASFLL	0	0	0	0	221830000	0	0	0	1	221830000	4.50796e-09	down
Q569Z5	Ddx46	463	Ddx46-463	AVIMTPTRELALQITKECKKFSKTLGLRVVC	0	0	0	0	28551000	22756000	0	0	2	25653500	3.8981e-08	down
A2APF3	Ctcfl	204	Ctcfl-204	GETDKREERLLLLEMKPKEGKDDEIVLTISH	0	0	0	0	10969000	0	0	0	1	10969000	9.1166e-08	down
A2APF3	Ctcfl	206	Ctcfl-206	TDKREERLLLLEMKPKEGKDDEIVLTISHLS	0	0	0	0	10969000	0	0	0	1	10969000	9.1166e-08	down
A9Q751	Cfap221	5	Cfap221-5	___________MEVVKSPMQELQQAKEPFDT	0	0	0	0	0	0	0	0	1	0	1	nochange
Q3UYH7	Adrbk2	230	Adrbk2-230	KMYAMKCLDKKRVKMKQGETLALNERIMLSL	0	0	0	0	4243200	0	0	0	1	4243200	2.35671e-07	down
Q8K2C8	Gpat4	426	Gpat4-426	ARQGGLVDLLWDGGLKREKVKDTFKEEQQKL	0	0	0	0	9203100	0	0	0	1	9203100	1.08659e-07	down
Q8VCI5	Pex19	92	Pex19-92	SELASQATAEFEKAMKELAEEEPHLVEQFQK	0	0	0	0	50204000	0	0	0	1	50204000	1.99187e-08	down
Q99MY8	Ash1l	456	Ash1l-456	ANISNHDSQELPESLKDSATGKAFEKSVMRH	0	0	0	0	1797400	0	0	0	1	1797400	5.56359e-07	down
A7L9Z8	Atp2c2	273	Atp2c2-273	VVIGTGEQSQFGEVFKMMRAEETPKTPLQKS	0	0	0	0	31640000	0	0	0	1	31640000	3.16056e-08	down
E9Q8T7	Dnah1	1261	Dnah1-1261	PVESKRYQTMERIWRKIMKNAYENREVINVC	0	0	0	0	0	0	0	0	1	0	1	nochange
P27773	Pdia3	75	Pdia3-75	CKRLAPEYEAAATRLKGIVPLAKVDCTANTN	0	0	0	0	1720200	0	0	0	1	1720200	5.81327e-07	down
Q69Z26	Cntn4	53	Cntn4-53	PLDSEEKKVKLSCEVKGNPKPHIRWKINGTD	0	0	0	0	0	0	0	0	1	0	1	nochange
Q6PDK2	Kmt2d	3537	Kmt2d-3537	LKVLEEQIGVHRKSRKALCAKQRTAKKAGRE	0	0	0	0	0	0	0	0	1	0	1	nochange
Q8BX70	Vps13c	2422	Vps13c-2422	STFDYSLKDRAPFTVKNALGVPMKVQPNRNL	0	0	0	0	960300	0	0	0	1	960300	1.04134e-06	down
Q9ERZ4	Chrm2	264	Chrm2-264	PGGDGGLEHNKIQNGKAPRDGGTENCVQGEE	0	0	0	0	0	0	0	0	1	0	1	nochange
E9Q557	Dsp	2115	Dsp-2115	TAEKAITGFDDPFSGKTVSVSEAIKKNLIDR	0	0	0	0	22420000	0	0	0	1	22420000	4.4603e-08	down
Q01514	Gbp1	475	Gbp1-475	RKYFESKEDLADTLLKMDQSLTEKEKQIEME	0	0	0	0	60046000	0	0	0	1	60046000	1.66539e-08	down
Q3UD82	Parp8	357	Parp8-357	SLSSDPRAEQAMSTIKSHKLLGRPCPSAGKQ	0	0	0	0	15903000	0	0	0	1	15903000	6.28812e-08	down
Q6P3D0	Nudt16	188	Nudt16-188	EALQDLKLLDPGIIAKLKIPDSK________	0	0	0	0	16701000	0	0	0	1	16701000	5.98767e-08	down
Q6ZPY2	Smg5	1014	Smg5-1014	ASVDVKNVLDFYRQWKEIG____________	0	0	0	0	12336000	0	0	0	1	12336000	8.10635e-08	down
Q8K297	Colgalt1	313	Colgalt1-313	DEAESFMHVQLEVMVKHPPVQLSRFISAPRK	0	0	0	0	0	0	0	0	1	0	1	nochange
Q9Z0T6	Pkdrej	973	Pkdrej-973	KYNISMVLQASRFVLKPTNKLVRIALFMVHC	0	0	0	0	16271000	0	0	0	1	16271000	6.1459e-08	down
Q9Z0T6	Pkdrej	977	Pkdrej-977	SMVLQASRFVLKPTNKLVRIALFMVHCLDMY	0	0	0	0	16271000	0	0	0	1	16271000	6.1459e-08	down
P59266	Fitm2	177	Fitm2-177	CALMIVEEMAVLHEVKTDRGHHLHAAITTLV	0	0	0	0	40372400	32583000	0	0	2	36477700	2.7414e-08	down
P97929	Brca2	3236	Brca2-3236	FQPPRSCGTKYATPIKKEPSSPRRRTPFQKT	0	0	0	0	0	0	0	0	1	0	1	nochange
Q80W93	Hydin	4595	Hydin-4595	RRILIMNTGDVGARFKWDVKKLKPHFSISPE	0	0	0	0	20596000	0	0	0	1	20596000	4.85531e-08	down
Q80W93	Hydin	4599	Hydin-4599	IMNTGDVGARFKWDVKKLKPHFSISPEEGYI	0	0	0	0	20596000	0	0	0	1	20596000	4.85531e-08	down
Q924Z4	Cers2	131	Cers2-131	RWFRRRRNQDRPSLLKKFREASWRFTYYLIA	0	0	0	0	18905000	0	0	0	1	18905000	5.28961e-08	down
Q924Z4	Cers2	132	Cers2-132	WFRRRRNQDRPSLLKKFREASWRFTYYLIAF	0	0	0	0	18905000	0	0	0	1	18905000	5.28961e-08	down
Q9D099	Acer3	8	Acer3-8	________MAPAVDRKGYWGPTTSTLDWCEE	0	0	0	0	107950000	0	0	0	1	107950000	9.26355e-09	down
P11531	Dmd	2595	Dmd-2595	EAKEEAEQVIGQVRGKLDSWKEGPHTVDAIQ	0	0	0	0	65639000	0	0	0	1	65639000	1.52348e-08	down
P54276	Msh6	597	Msh6-597	RTLVAHYPPVQILFEKGNLSTETKTVLKGSL	0	0	0	0	81179000	0	0	0	1	81179000	1.23185e-08	down
Q4G0F8	Ubn1	528	Ubn1-528	FQWNDEIRELLCQVVKIKLESRDLERNSKAQ	0	0	0	0	0	0	0	0	1	0	1	nochange
Q4VAA7	Snx33	339	Snx33-339	SQYEGFQHFLSCLDDKQWKMGKRRAEKDEMV	0	0	0	0	221830000	0	0	0	1	221830000	4.50796e-09	down
Q5FW57	Gm4952	169	Gm4952-169	DHQSGRPRAIDQEMFKLSTLDVTHAPLVDKF	0	0	0	0	13222000	0	0	0	1	13222000	7.56315e-08	down
Q5XG71	Utp20	9	Utp20-9	_______MKPKPLSHKTENTYRFLTFAERLG	0	0	0	0	7762900	11893000	0	0	2	9827950	1.01751e-07	down
Q6EDY6	Carmil1	530	Carmil1-530	IQHLALGKNFNNMKSKNLTPVLDNLVQMIQD	0	0	0	0	240820000	262980000	0	0	2	251900000	3.96983e-09	down
Q923B1	Dbr1	256	Dbr1-256	DKDQAGKETKFLALDKCLPHRDFLQVLEIEH	0	0	0	0	19181000	0	0	0	1	19181000	5.21349e-08	down
Q9Z0E3	Aire	115	Aire-115	GFPKDVDLNQSRKGRKPLAGPKAAVLPPRPP	0	0	0	0	0	0	0	0	1	0	1	nochange
Q9CQC8	Spg21	117	Spg21-117	KVHLFGASLGGFLAQKFAEYTHKSPRVHSLI	0	0	0	0	0	0	0	0	1	0	1	nochange
Q68FE8	Znf280d	691	Znf280d-691	MSFHSNRPSKRYCIFKKHSENLRGISLVCLN	0	0	0	0	0	1567500	0	0	1	1567500	6.37958e-07	down
Q68FE8	Znf280d	692	Znf280d-692	SFHSNRPSKRYCIFKKHSENLRGISLVCLNC	0	0	0	0	0	1567500	0	0	1	1567500	6.37958e-07	down
Q9WUA3	Pfkp	523	Pfkp-523	FEAYLGLLELAAAREKHEAFCVPMVMVPATV	0	0	0	0	0	6069200	0	0	1	6069200	1.64766e-07	down
P56960	Exosc10	875	Exosc10-875	CKQSVGNKSMSFAVGKSDRGFRHNWPKR___	0	0	0	0	0	0	0	0	1	0	1	nochange
Q3U3W5	Prmt9	284	Prmt9-284	SLIHAWEHLLLQPKTKEENGNCGKYGKVIPA	0	0	0	0	0	10413000	0	0	1	10413000	9.60338e-08	down
Q5F226	Fat2	2508	Fat2-2508	NAKVGTKVIELLAIDKDSGPYGTVDYTIINK	0	0	0	0	0	2830700	0	0	1	2830700	3.53269e-07	down
Q6ZQ38	Cand1	36	Cand1-36	DFRFMATNDLMTELQKDSIKLDDDSERKVVK	0	0	0	0	0	7990100	0	0	1	7990100	1.25155e-07	down
Q8BGE7	Trim6	168	Trim6-168	REQQEAEKLKALIQEKRESWKSQVEPEKRRI	0	0	0	0	0	0	0	0	1	0	1	nochange
Q8K2G4	Bbs7	157	Bbs7-157	LSGDKINDVICLPVEKLSRVTPVLACQDRVL	0	0	0	0	0	182116000	0	0	1	182116000	5.49101e-09	down
Q9D2L9	Fam111a	328	Fam111a-328	KSEKRKKKASLFKVHKEHFGKMTRNSTPVKV	0	0	0	0	0	57077000	0	0	1	57077000	1.75202e-08	down
Q9QZ41	Dbf4	506	Dbf4-506	LPQPQLAADITQLSAKDLQEKGFHVVIGHAS	0	0	0	0	0	0	0	0	1	0	1	nochange
Q9QZH3	Ppie	83	Ppie-83	NESELFGRTIRVNLAKPMRIKEGSSRPVWSD	0	0	0	0	0	10309000	0	0	1	10309000	9.70026e-08	down
Q9QZH3	Ppie	88	Ppie-88	FGRTIRVNLAKPMRIKEGSSRPVWSDDDWLK	0	0	0	0	0	10309000	0	0	1	10309000	9.70026e-08	down
Q9R155	Slc26a4	632	Slc26a4-632	PDEDVEEPEELNIPTKEIEIQVDWNSELPVK	0	0	0	0	0	21009000	0	0	1	21009000	4.75986e-08	down
P0C6F1	Dnah2	3973	Dnah2-3973	SPHPDFPISILQASIKMTTEPPKGLKANMTR	0	0	0	0	0	0	0	0	1	0	1	nochange
Q3TPJ7	Midn	451	Midn-451	SEATGLGLDFEDSVWKPEVNPDIQSEFVVA_	0	0	0	0	0	26592000	0	0	1	26592000	3.76053e-08	down
Q3UJB9	Edc4	119	Edc4-119	SDSSISSKARGSNKVKIQPVAKYDWEQKYYY	0	0	0	0	0	2408800	0	0	1	2408800	4.15144e-07	down
Q3UJB9	Edc4	125	Edc4-125	SKARGSNKVKIQPVAKYDWEQKYYYGNLIAV	0	0	0	0	0	2408800	0	0	1	2408800	4.15144e-07	down
Q6ZQ93	Usp34	2309	Usp34-2309	LLEWIWHDNMQFLQDKNIFEHTYFGFMWQLC	0	0	0	0	0	0	0	0	1	0	1	nochange
Q80YV3	Trrap	997	Trrap-997	SYIDRLISVFMRSLQKMVREHLNPQTASGST	0	0	0	0	0	11270000	0	0	1	11270000	8.87311e-08	down
Q810B8	Slitrk4	808	Slitrk4-808	SLIGGNHSKIVVEQRKSEYFELKAKLQSSPD	0	0	0	0	0	0	0	0	1	0	1	nochange
Q8BHG2	Czib	66	Czib-66	SVALKGGRGSASMVQKCKLCARENSIDILSS	0	0	0	0	0	18034000	0	0	1	18034000	5.54508e-08	down
Q8K3V7	Minar1	431	Minar1-431	VPKDQQKVLPAGYAVKPNGLKSKEISSPVDL	0	0	0	0	0	172740000	0	0	1	172740000	5.78905e-09	down
Q8K3V7	Minar1	436	Minar1-436	QKVLPAGYAVKPNGLKSKEISSPVDLEKHEA	0	0	0	0	0	172740000	0	0	1	172740000	5.78905e-09	down
Q91ZA6	Socs4	167	Socs4-167	SPNSDEWVSADLSERKLRDAQLKRRNTEDDI	0	0	0	0	0	7974400	0	0	1	7974400	1.25401e-07	down
Q91ZA6	Socs4	174	Socs4-174	VSADLSERKLRDAQLKRRNTEDDIPCFSHTN	0	0	0	0	0	7974400	0	0	1	7974400	1.25401e-07	down
Q9D2H5	Trim42	390	Trim42-390	EVRNGFLKLRAILQEKEKIIMEQIENLEVSR	0	0	0	0	0	29252000	0	0	1	29252000	3.41857e-08	down
Q9DCB4	Arpp21	54	Arpp21-54	LELQRRLAAQNQERRKSKSGAGKGKLTRSLA	0	0	0	0	0	0	0	0	1	0	1	nochange
Q9DCB4	Arpp21	56	Arpp21-56	LQRRLAAQNQERRKSKSGAGKGKLTRSLAVC	0	0	0	0	0	0	0	0	1	0	1	nochange
Q9R0I7	Ylpm1	712	Ylpm1-712	PKGSFLEGPRGPREQKEQLQKLKDFGSEPQM	0	0	0	0	0	49210000	0	0	1	49210000	2.03211e-08	down
Q9WU79	Prodh	572	Prodh-572	LPYLSRRALENSSIMKGAQRERQLLWQELRR	0	0	0	0	0	0	0	0	1	0	1	nochange
P11369	Pol	1051	Pol-1051	TKRPPTDWERIFTYPKSDRGLISNIYKELKK	0	0	0	0	0	6837400	0	0	1	6837400	1.46254e-07	down
P81183	Ikzf2	275	Ikzf2-275	FERPAVIEKLTANMGKRKSSTPQKFVGEKLM	0	0	0	0	0	14646000	0	0	1	14646000	6.8278e-08	down
Q80X80	C2cd2l	677	C2cd2l-677	SHDDLSNTTATPSVRKKAGSFSRRLIKRFSF	0	0	0	0	0	78112000	0	0	1	78112000	1.28021e-08	down
Q8C080	Snx16	132	Snx16-132	VMEERAKFTVYKILVKKSPEESWVVFRRYTD	0	0	0	0	0	0	0	0	1	0	1	nochange
Q8C080	Snx16	133	Snx16-133	MEERAKFTVYKILVKKSPEESWVVFRRYTDF	0	0	0	0	0	0	0	0	1	0	1	nochange
E9Q7R9	Cfap43	1183	Cfap43-1183	ALWSEDERKQFKEYEKKVKELNEERDKYRKS	0	0	0	0	0	16139000	0	0	1	16139000	6.19617e-08	down
Q62406	Irak1	397	Irak1-397	STVRGTLAYLPEEYIKTGRLAVDTDTFSFGV	0	0	0	0	0	4411500	0	0	1	4411500	2.2668e-07	down
Q6P5F9	Xpo1	752	Xpo1-752	EMVTKQPLIRSMRTVKRETLKLISGWVSRSN	0	0	0	0	0	0	0	0	1	0	1	nochange
Q6XUX1	Dstyk	387	Dstyk-387	INQAFDMQRDLQITPKRLEYTRKKENELYES	0	0	0	0	0	33400000	0	0	1	33400000	2.99401e-08	down
Q80UZ0	Fgd5	295	Fgd5-295	LPEGKPPECVRALPAKPRAFTLYPRSFSVEG	0	0	0	0	0	7212800	0	0	1	7212800	1.38642e-07	down
Q811Q9	Pcyt1b	248	Pcyt1b-248	SFINEKKYRFQNQVDKMKEKVKNVEERSKEF	0	0	0	0	0	19788000	0	0	1	19788000	5.05357e-08	down
Q8C170	Myo9a	57	Myo9a-57	AAEVIDSLINRLHLDKTKCYVLAEVKEFGGE	0	0	0	0	0	45837000	0	0	1	45837000	2.18164e-08	down
Q91VW5	Golga4	574	Golga4-574	ELELQKKAILTESENKLQELGQEAEAYRTRI	0	0	0	0	0	0	0	0	1	0	1	nochange
Q9JLC8	Sacs	532	Sacs-532	TEKSSDFPLSVDTIYKLWPEASKVKAHWHPV	0	0	0	0	0	8172000	0	0	1	8172000	1.22369e-07	down
O08912	Galnt1	405	Galnt1-405	KVDYGDISSRLGLRRKLQCKPFSWYLENIYP	0	0	0	0	0	0	0	0	1	0	1	nochange
Q14B48	Itprid1	826	Itprid1-826	YSQAEDPKVQFMKTLKILQDTTVRDLCSCTV	0	0	0	0	0	19667000	0	0	1	19667000	5.08466e-08	down
Q3UKU1	Ell2	475	Ell2-475	KSKKKSKKHKEKDQIKKLDIETMEEKEEDLQ	0	0	0	0	0	0	0	0	1	0	1	nochange
Q3UKU1	Ell2	476	Ell2-476	SKKKSKKHKEKDQIKKLDIETMEEKEEDLQR	0	0	0	0	0	0	0	0	1	0	1	nochange
Q5F226	Fat2	3298	Fat2-3298	FETNPKYFLSIECSRKSSSSLSDVTTIVINV	0	0	0	0	0	1559600	0	0	1	1559600	6.4119e-07	down
Q5U4D9	Thoc6	111	Thoc6-111	EVKGWLWAEILKKGCKELWRRQPPYRTSLEV	0	0	0	0	0	52095000	0	0	1	52095000	1.91957e-08	down
Q61194	Pik3c2a	722	Pik3c2a-722	YYLICSLSHNGKDLFKPIQSKKVGTYKNFFY	0	0	0	0	0	47486000	0	0	1	47486000	2.10588e-08	down
Q6P4S6	Sik3	163	Sik3-163	GEIFDHLVAHGRMAEKEARRKFKQIVTAVYF	0	0	0	0	0	13179000	0	0	1	13179000	7.58783e-08	down
Q80Y20	Alkbh8	218	Alkbh8-218	VCSSILEKLLKEGYIKHKPDQLTINQYEPGH	0	0	0	0	0	29929000	0	0	1	29929000	3.34124e-08	down
Q80Y20	Alkbh8	220	Alkbh8-220	SSILEKLLKEGYIKHKPDQLTINQYEPGHGI	0	0	0	0	0	29929000	0	0	1	29929000	3.34124e-08	down
Q8BWR4	Usp40	589	Usp40-589	QLLECWEGDMVLSVAKRVPAGLHVYHTLDGD	0	0	0	0	0	20991000	0	0	1	20991000	4.76395e-08	down
Q99KI0	Aco2	57	Aco2-57	YIRYDLLEKNINIVRKRLNRPLTLSEKIVYG	0	0	0	0	0	12721000	0	0	1	12721000	7.86102e-08	down
Q99PV5	Bhlhe41	85	Bhlhe41-85	LLPEHLKLTTLGHLEKAVVLELTLKHLKALT	0	0	0	0	0	62779000	0	0	1	62779000	1.59289e-08	down
Q6GU68	Islr	367	Islr-367	EDAVGHKFHGKAVEGKGCYTVDNEVQPSGPE	0	0	0	0	0	3118000	0	0	1	3118000	3.20718e-07	down
Q6P7W2	Shkbp1	257	Shkbp1-257	ALAARVLGGAPGEHDKMVAAATGSEILLWAL	0	0	0	0	0	5786900	0	0	1	5786900	1.72804e-07	down
Q8BGE7	Trim6	162	Trim6-162	SLKKLRREQQEAEKLKALIQEKRESWKSQVE	0	0	0	0	0	0	0	0	1	0	1	nochange
Q9CYI0	Njmu	365	Njmu-365	CYMFLKNCGSGDILLKIVKVEHEEMPEAKSV	0	0	0	0	0	42361000	0	0	1	42361000	2.36066e-08	down
Q9D2L9	Fam111a	325	Fam111a-325	IKEKSEKRKKKASLFKVHKEHFGKMTRNSTP	0	0	0	0	0	57077000	0	0	1	57077000	1.75202e-08	down
Q9EST3	Eif4enif1	756	Eif4enif1-756	NPIPNTDQDSSTTNPKLSTLQRSSCSTPLSQ	0	0	0	0	0	112500000	0	0	1	112500000	8.88889e-09	down
Q9QUJ7	Acsl4	702	Acsl4-702	DAFKLKRKELKNHYLKDIERMYGGK______	0	0	0	0	0	0	0	0	1	0	1	nochange
Q9QZ41	Dbf4	347	Dbf4-347	QLVFDFVEYGRDTPQKKRIRYSVGSLSSVSA	0	0	0	0	0	81152000	0	0	1	81152000	1.23226e-08	down
Q8CDK3	Iqub	255	Iqub-255	IKSDFHKPFLGGFRHKITGLEYHNAGTQTVP	0	0	0	0	0	0	0	0	1	0	1	nochange
Q9DB96	Ngdn	307	Ngdn-307	QNPVKKRKKLPKKGRKKKGFRRRW_______	0	0	0	0	0	18478000	0	0	1	18478000	5.41184e-08	down
Q8BJ34	Marf1	901	Marf1-901	PLFKFIDIYEKKYGHKLNVSDLYKLTDTIAI	0	0	0	0	0	24997000	0	0	1	24997000	4.00048e-08	down
Q8BJ34	Marf1	909	Marf1-909	YEKKYGHKLNVSDLYKLTDTIAIREQGNGRL	0	0	0	0	0	24997000	0	0	1	24997000	4.00048e-08	down
Q3UR32	P2rx3	348	P2rx3-348	GVGTVLCDIILLNFLKGADHYKARKFEEVTE	0	0	0	0	0	21431000	0	0	1	21431000	4.66614e-08	down
Q6P8Y1	Capsl	118	Capsl-118	TLRPPMSRARKEVIMKAFRKLDKTGDGVITI	0	0	0	0	0	0	0	0	1	0	1	nochange
Q8R3Z5	Cacnb1	99	Cacnb1-99	EAERQALAQLEKAKTKPVAFAVRTNVGYNPS	0	0	0	0	0	427280000	0	0	1	427280000	2.34039e-09	down
Q8CE72	Cplane1	619	Cplane1-619	THFFYILQFIKCPVPKFDLFLNKSLKRNAWV	0	0	0	0	0	0	0	0	1	0	1	nochange
Q91ZW9	Cd209c	113	Cd209c-113	TSKEKGYAWMGLSDLKHEGRWHWVDGSHLLF	0	0	0	0	0	21734000	0	0	1	21734000	4.60109e-08	down
Q6ZPL9	Ddx55	59	Ddx55-59	MKNKDVAAEAVTGSGKTLAFVIPILEILLRR	0	0	0	0	0	1458800	0	0	1	1458800	6.85494e-07	down
Q78DX7	Ros1	1377	Ros1-1377	GCQCWKVIMVPTIPGKRIISLTVDGEFIYWI	0	0	0	0	0	3070900	0	0	1	3070900	3.25637e-07	down
A2ASS6	Ttn	30890	Ttn-30890	KELDLCEKISLQYTGKRATAVIKYCDRSDSG	0	0	0	0	0	17644000	0	0	1	17644000	5.66765e-08	down
E9Q401	Ryr2	1841	Ryr2-1841	FYTLLIMGIFHNEDLKHILQLIEPSVFKEAA	0	0	0	0	0	0	0	0	1	0	1	nochange
E9Q401	Ryr2	1853	Ryr2-1853	EDLKHILQLIEPSVFKEAAVPEEEGGTPEKE	0	0	0	0	0	0	0	0	1	0	1	nochange
Q3TY92	Mbd6	856	Mbd6-856	PDPPVPELLTGRGSGKRGRRGGGGLRGINGE	0	0	0	0	0	0	0	0	1	0	1	nochange
Q5XG71	Utp20	2613	Utp20-2613	EKAGAGGKMESNREKKEEPSKPATLMWLIQK	0	0	0	0	0	51741000	0	0	1	51741000	1.9327e-08	down
Q5XG71	Utp20	2618	Utp20-2618	GGKMESNREKKEEPSKPATLMWLIQKLSRMA	0	0	0	0	0	51741000	0	0	1	51741000	1.9327e-08	down
Q6R2P8	Neil2	265	Neil2-265	SSSREALVDHVVEFSKDWLRDKFQGKERHTQ	0	0	0	0	0	87463000	0	0	1	87463000	1.14334e-08	down
Q8R3P0	Aspa	252	Aspa-252	DMAAVIHPNLQDQDWKPLHPGDPVFVSLDGK	0	0	0	0	0	111910000	0	0	1	111910000	8.93575e-09	down
Q9QXK2	Rad18	328	Rad18-328	RLEASKLNENVMVFTKNQTEKEIEEVHSEYR	0	0	0	0	0	21235000	0	0	1	21235000	4.70921e-08	down
P23578	Acr	189	Acr-189	IPHTCYVTGWGYIKEKAPRPSPVLMEARVDL	0	0	0	0	0	140240000	0	0	1	140240000	7.13063e-09	down
Q1HKZ5	Map3k13	501	Map3k13-501	SAIMLQLEMREKELLKREQAVEKKYPGTYKR	0	0	0	0	0	23824000	0	0	1	23824000	4.19745e-08	down
Q64264	Htr1a	334	Htr1a-334	ACLERKNERTAEAKRKMALARERKTVKTLGI	0	0	0	0	0	6053000	0	0	1	6053000	1.65207e-07	down
Q8BXB6	Slco2b1	581	Slco2b1-581	ITHTPSFMLILRGVKKEDKTLAVGMQFMLLR	0	0	0	0	0	231120000	0	0	1	231120000	4.32676e-09	down
Q8BXB6	Slco2b1	584	Slco2b1-584	TPSFMLILRGVKKEDKTLAVGMQFMLLRVLA	0	0	0	0	0	231120000	0	0	1	231120000	4.32676e-09	down
Q8K3V7	Minar1	438	Minar1-438	VLPAGYAVKPNGLKSKEISSPVDLEKHEAVK	0	0	0	0	0	172740000	0	0	1	172740000	5.78905e-09	down
Q8R5M2	Wnt9a	177	Wnt9a-177	AWQWGGCGDNLKYSSKFVKEFLGRRSSKDLR	0	0	0	0	0	0	0	0	1	0	1	nochange
Q8R5M2	Wnt9a	180	Wnt9a-180	WGGCGDNLKYSSKFVKEFLGRRSSKDLRARV	0	0	0	0	0	0	0	0	1	0	1	nochange
Q9D2V7	Coro7	148	Coro7-148	QFHPTVDGVLVSTAGKTVKVWDVAKQQPLTE	0	0	0	0	0	20217000	0	0	1	20217000	4.94633e-08	down
Q9D2V7	Coro7	151	Coro7-151	PTVDGVLVSTAGKTVKVWDVAKQQPLTELEA	0	0	0	0	0	20217000	0	0	1	20217000	4.94633e-08	down
Q9DCB4	Arpp21	61	Arpp21-61	AAQNQERRKSKSGAGKGKLTRSLAVCEESSA	0	0	0	0	0	0	0	0	1	0	1	nochange
Q9JJA7	Ccnl2	115	Ccnl2-115	GQVLFQRFFYTKSFVKHSMEHVSMACVHLAS	0	0	0	0	0	2329500	0	0	1	2329500	4.29276e-07	down
P81183	Ikzf2	268	Ikzf2-268	NNISLVPFERPAVIEKLTANMGKRKSSTPQK	0	0	0	0	0	14646000	0	0	1	14646000	6.8278e-08	down
Q6ZWR6	Syne1	7754	Syne1-7754	DALAVYLSAEDISMLKERVELLQRQWEELCH	0	0	0	0	0	6216100	0	0	1	6216100	1.60873e-07	down
Q80WV7	Srrm3	221	Srrm3-221	VKKHRRDRSDSGSRRKRRYRSRSLKSKRKEK	0	0	0	0	0	32149000	0	0	1	32149000	3.11052e-08	down
Q8BJ34	Marf1	896	Marf1-896	PACCLPLFKFIDIYEKKYGHKLNVSDLYKLT	0	0	0	0	0	24997000	0	0	1	24997000	4.00048e-08	down
Q8BJ34	Marf1	897	Marf1-897	ACCLPLFKFIDIYEKKYGHKLNVSDLYKLTD	0	0	0	0	0	24997000	0	0	1	24997000	4.00048e-08	down
Q99MI1	Erc1	985	Erc1-985	DRLVQQLKQQTQNRMKLMADNYEDDHFRSSR	0	0	0	0	0	18334000	0	0	1	18334000	5.45435e-08	down
Q0VBD2	Mcm10	772	Mcm10-772	EAEAELQKSYFEPLVKKEQMEEKMRATREVK	0	0	0	0	0	0	0	0	1	0	1	nochange
Q8BNE1	Tcaf1	187	Tcaf1-187	GNLVTSVAGVYFTDNKADTSFFKVSKKMPKI	0	0	0	0	0	4358600	0	0	1	4358600	2.29431e-07	down
Q8BNE1	Tcaf1	194	Tcaf1-194	AGVYFTDNKADTSFFKVSKKMPKIPILVRCD	0	0	0	0	0	4358600	0	0	1	4358600	2.29431e-07	down
Q8CFD4	Snx8	348	Snx8-348	VLHKHQRALHKYGLMKRQMMSAAHGREPESV	0	0	0	0	0	16743000	0	0	1	16743000	5.97264e-08	down
Q8K2A6	Lipm	237	Lipm-237	RSPGTKFLLLPDMMIKVLFGRQEFLYQTRFF	0	0	0	0	0	2211500	0	0	1	2211500	4.52182e-07	down
Q9JI18	Lrp1b	1788	Lrp1b-1788	MKEELTKATALTIMDKKLWWADQNLAQLGTC	0	0	0	0	0	22674000	0	0	1	22674000	4.41034e-08	down
Q9JI18	Lrp1b	1789	Lrp1b-1789	KEELTKATALTIMDKKLWWADQNLAQLGTCN	0	0	0	0	0	22674000	0	0	1	22674000	4.41034e-08	down
A2AT37	Upf2	1210	Upf2-1210	HWNQQQAEQEERMRMKKLTLDINERQEQEDY	0	0	0	0	0	0	0	0	1	0	1	nochange
A2AT37	Upf2	1211	Upf2-1211	WNQQQAEQEERMRMKKLTLDINERQEQEDYQ	0	0	0	0	0	0	0	0	1	0	1	nochange
O70299	Mab21l1	284	Mab21l1-284	LNNYHMKTLVSYECEKHPRESDWDESCLGDR	0	0	0	0	0	0	0	0	1	0	1	nochange
P14824	Anxa6	265	Anxa6-265	RSTPEYFAERLFKAMKGLGTRDNTLIRIMVS	0	0	0	0	0	0	0	0	1	0	1	nochange
P38585	Ttl	198	Ttl-198	QKYLERPLLLEPGHRKFDIRSWVLVDHQYNI	0	0	0	0	0	0	0	0	1	0	1	nochange
Q3UIL6	Plekha7	742	Plekha7-742	HRQTEQYRDQPQHLEKITCQQRLLQEDLVHI	0	0	0	0	0	14599000	0	0	1	14599000	6.84978e-08	down
Q3UU96	Cdc42bpa	777	Cdc42bpa-777	KQQYEREKVLLTEENKKLTSELDKLTSLYES	0	0	0	0	0	6900900	0	0	1	6900900	1.44909e-07	down
Q811T9	Disc1	518	Disc1-518	ALVAQMSPGQLQEVSKALGETLTSANQAPFQ	0	0	0	0	0	183800000	0	0	1	183800000	5.4407e-09	down
Q812A2	Srgap3	155	Srgap3-155	KKSKEIGLQMHEELLKVTNELYTVMKTYHMY	0	0	0	0	0	0	0	0	1	0	1	nochange
Q8CCH7	Zfpm2	973	Zfpm2-973	NKHLFLPQCLYPGAIKKTKGADQLSPYYGIK	0	0	0	0	0	0	0	0	1	0	1	nochange
Q8CE72	Cplane1	626	Cplane1-626	QFIKCPVPKFDLFLNKSLKRNAWVLCVFQLF	0	0	0	0	0	0	0	0	1	0	1	nochange
Q8K1A6	Cc2d1a	656	Cc2d1a-656	VFPDLSNSDMLLFIVKGINLPTPTGLSPSDL	0	0	0	0	0	4703100	0	0	1	4703100	2.12626e-07	down
Q99PV5	Bhlhe41	94	Bhlhe41-94	TLGHLEKAVVLELTLKHLKALTALTEQQHQK	0	0	0	0	0	62779000	0	0	1	62779000	1.59289e-08	down
Q99PV5	Bhlhe41	97	Bhlhe41-97	HLEKAVVLELTLKHLKALTALTEQQHQKIIA	0	0	0	0	0	62779000	0	0	1	62779000	1.59289e-08	down
Q9DBS5	Klc4	572	Klc4-572	KIRDVLRRSSELLVRKLQGTEPRPSSSSMKR	0	0	0	0	0	141280000	0	0	1	141280000	7.07814e-09	down
Q9JL27	Fut2	322	Fut2-322	TIYLANYTLPDSPFLKIFKPAAAFLPEWMGI	0	0	0	0	0	0	0	0	1	0	1	nochange
Q9JL27	Fut2	325	Fut2-325	LANYTLPDSPFLKIFKPAAAFLPEWMGIPAD	0	0	0	0	0	0	0	0	1	0	1	nochange
Q9JM84	Cst10	53	Cst10-53	LGGVEPADPKDKEVQKVVKFAVRTYNDMDND	0	0	0	0	0	46760000	0	0	1	46760000	2.13858e-08	down
Q9JM84	Cst10	56	Cst10-56	VEPADPKDKEVQKVVKFAVRTYNDMDNDLYL	0	0	0	0	0	46760000	0	0	1	46760000	2.13858e-08	down

## Sheet: Up-metascape
GroupID	Category	Term	Description	LogP	Log(q-value)	Genes	Symbols	InTerm_InList
1_Summary	GO Cellular Components	GO:0099513	polymeric cytoskeletal fiber	-8.51222	-4.10802	11426,12075,12316,12362,12365,13424,15505,16348,16561,16570,17756,17916,17918,18000,18810,20877,21844,29875,50875,50884,51810,66411,68511,70292,71276,74053,74237,74410,75991,77055,101100,102747,108100,212307,217310,229841,231912,276829,319953,320878,327954,381917,667663,17776,58251,66725,68339,70762,232933,235626,236266	Macf1,Bfsp1,Aspm,Casp1,Casp14,Dync1h1,Hsph1,Invs,Kif1b,Kif3c,Map2,Myo1f,Myo5a,Septin2,Plec,Aurkb,Tiam1,Iqgap1,Tmod3,Nckap1,Hnrnpu,Tbcb,Dcdc2c,Afap1,Ccdc57,Grip1,Tubgcp2,Ttll11,Slain2,Krt76,Ttll3,Lrrc49,Baiap2,Mapre2,Hid1,Cenpe,Katnal1,Smtnl2,Ttll1,Mical2,Dnah2,Dnah3,Myo3a,Mast2,Cep295nl,Lrrk2,Ccdc88c,Dclk2,Ccdc61,Setd2,Alms1	51/-
1_Member	GO Cellular Components	GO:0099513	polymeric cytoskeletal fiber	-8.51222	-4.10802	11426,12075,12316,12362,12365,13424,15505,16348,16561,16570,17756,17916,17918,18000,18810,20877,21844,29875,50875,50884,51810,66411,68511,70292,71276,74053,74237,74410,75991,77055,101100,102747,108100,212307,217310,229841,231912,276829,319953,320878,327954,381917,667663	Macf1,Bfsp1,Aspm,Casp1,Casp14,Dync1h1,Hsph1,Invs,Kif1b,Kif3c,Map2,Myo1f,Myo5a,Septin2,Plec,Aurkb,Tiam1,Iqgap1,Tmod3,Nckap1,Hnrnpu,Tbcb,Dcdc2c,Afap1,Ccdc57,Grip1,Tubgcp2,Ttll11,Slain2,Krt76,Ttll3,Lrrc49,Baiap2,Mapre2,Hid1,Cenpe,Katnal1,Smtnl2,Ttll1,Mical2,Dnah2,Dnah3,Myo3a	43/707
1_Member	GO Cellular Components	GO:0005874	microtubule	-7.60762	-3.90239	11426,12316,12362,13424,15505,16348,16561,16570,17756,18000,20877,21844,29875,51810,66411,68511,71276,74053,74237,74410,75991,101100,102747,108100,212307,217310,229841,231912,319953,327954,381917	Macf1,Aspm,Casp1,Dync1h1,Hsph1,Invs,Kif1b,Kif3c,Map2,Septin2,Aurkb,Tiam1,Iqgap1,Hnrnpu,Tbcb,Dcdc2c,Ccdc57,Grip1,Tubgcp2,Ttll11,Slain2,Ttll3,Lrrc49,Baiap2,Mapre2,Hid1,Cenpe,Katnal1,Ttll1,Dnah2,Dnah3	31/444
1_Member	GO Molecular Functions	GO:0015631	tubulin binding	-4.18206	-1.32193	11426,15505,16561,16570,17756,17776,21844,50875,58251,66411,66725,68339,70762,74237,74410,212307,229841,231912,232933,235626,236266,319953	Macf1,Hsph1,Kif1b,Kif3c,Map2,Mast2,Tiam1,Tmod3,Cep295nl,Tbcb,Lrrk2,Ccdc88c,Dclk2,Tubgcp2,Ttll11,Mapre2,Cenpe,Katnal1,Ccdc61,Setd2,Alms1,Ttll1	22/387
1_Member	GO Molecular Functions	GO:0008017	microtubule binding	-3.94086	-1.23249	11426,16561,16570,17756,17776,21844,50875,58251,66411,68339,70762,74237,212307,229841,231912,232933,236266	Macf1,Kif1b,Kif3c,Map2,Mast2,Tiam1,Tmod3,Cep295nl,Tbcb,Ccdc88c,Dclk2,Tubgcp2,Mapre2,Cenpe,Katnal1,Ccdc61,Alms1	17/267
2_Summary	GO Molecular Functions	GO:0030695	GTPase regulator activity	-7.92923	-4.03368	13645,13998,14697,16801,19730,20403,21844,29875,54189,66725,68339,68813,71310,71972,73341,76131,77980,94221,103724,105445,105841,208869,210789,223864,224617,232906,241694,244867,263406,270163,381112,12362,12367,18607,18786,68734,76233,104570,240354,17295,23790,212307	Egf,Fgd6,Gnb5,Arhgef1,Ralgds,Itsn2,Tiam1,Iqgap1,Rabep1,Lrrk2,Ccdc88c,Dock5,Tbc1d9,Dnmbp,Arhgef6,Depdc1a,Sbf1,Gopc,Tbc1d10a,Dock9,Dennd3,Dock3,Tbc1d4,Rapgef3,Tbc1d24,Arhgap35,Ralgapa2,Arhgap20,Plekhg3,Myo9a,Arhgef33,Casp1,Casp3,Pdpk1,Plaa,Ppp4r3a,Dnttip1,Ppp4r3b,Malt1,Met,Coro1c,Mapre2	42/-
2_Member	GO Molecular Functions	GO:0030695	GTPase regulator activity	-7.92923	-4.03368	13645,13998,14697,16801,19730,20403,21844,29875,54189,66725,68339,68813,71310,71972,73341,76131,77980,94221,103724,105445,105841,208869,210789,223864,224617,232906,241694,244867,263406,270163,381112	Egf,Fgd6,Gnb5,Arhgef1,Ralgds,Itsn2,Tiam1,Iqgap1,Rabep1,Lrrk2,Ccdc88c,Dock5,Tbc1d9,Dnmbp,Arhgef6,Depdc1a,Sbf1,Gopc,Tbc1d10a,Dock9,Dennd3,Dock3,Tbc1d4,Rapgef3,Tbc1d24,Arhgap35,Ralgapa2,Arhgap20,Plekhg3,Myo9a,Arhgef33	31/430
2_Member	GO Molecular Functions	GO:0060589	nucleoside-triphosphatase regulator activity	-7.83582	-4.03368	13645,13998,14697,16801,19730,20403,21844,29875,54189,66725,68339,68813,71310,71972,73341,76131,77980,94221,103724,105445,105841,208869,210789,223864,224617,232906,241694,244867,263406,270163,381112	Egf,Fgd6,Gnb5,Arhgef1,Ralgds,Itsn2,Tiam1,Iqgap1,Rabep1,Lrrk2,Ccdc88c,Dock5,Tbc1d9,Dnmbp,Arhgef6,Depdc1a,Sbf1,Gopc,Tbc1d10a,Dock9,Dennd3,Dock3,Tbc1d4,Rapgef3,Tbc1d24,Arhgap35,Ralgapa2,Arhgap20,Plekhg3,Myo9a,Arhgef33	31/434
2_Member	GO Molecular Functions	GO:0005085	guanyl-nucleotide exchange factor activity	-6.08597	-2.63601	13645,13998,16801,19730,20403,21844,68339,68813,71972,73341,77980,103724,105445,105841,208869,223864,263406,381112	Egf,Fgd6,Arhgef1,Ralgds,Itsn2,Tiam1,Ccdc88c,Dock5,Dnmbp,Arhgef6,Sbf1,Tbc1d10a,Dock9,Dennd3,Dock3,Rapgef3,Plekhg3,Arhgef33	18/204
2_Member	GO Molecular Functions	GO:0005096	GTPase activator activity	-4.01568	-1.26029	14697,16801,29875,54189,66725,68813,71310,76131,103724,208869,210789,224617,232906,241694,244867,270163	Gnb5,Arhgef1,Iqgap1,Rabep1,Lrrk2,Dock5,Tbc1d9,Depdc1a,Tbc1d10a,Dock3,Tbc1d4,Tbc1d24,Arhgap35,Ralgapa2,Arhgap20,Myo9a	16/238
2_Member	GO Molecular Functions	GO:0008047	enzyme activator activity	-2.73469	-0.555794	12362,12367,13645,14697,16801,18607,18786,29875,54189,66725,68734,68813,71310,76131,76233,103724,104570,208869,210789,224617,232906,240354,241694,244867,270163	Casp1,Casp3,Egf,Gnb5,Arhgef1,Pdpk1,Plaa,Iqgap1,Rabep1,Lrrk2,Ppp4r3a,Dock5,Tbc1d9,Depdc1a,Dnttip1,Tbc1d10a,Ppp4r3b,Dock3,Tbc1d4,Tbc1d24,Arhgap35,Malt1,Ralgapa2,Arhgap20,Myo9a	25/591
2_Member	GO Biological Processes	GO:0043087	regulation of GTPase activity	-2.67054	-0.528172	13998,14697,17295,19730,21844,23790,29875,66725,71310,103724,105445,210789,212307,223864,232906,241694,270163	Fgd6,Gnb5,Met,Ralgds,Tiam1,Coro1c,Iqgap1,Lrrk2,Tbc1d9,Tbc1d10a,Dock9,Tbc1d4,Mapre2,Rapgef3,Arhgap35,Ralgapa2,Myo9a	17/346
2_Member	GO Biological Processes	GO:0043547	positive regulation of GTPase activity	-2.3265	-0.343902	14697,19730,21844,23790,71310,103724,105445,210789,212307,223864,232906,241694,270163	Gnb5,Ralgds,Tiam1,Coro1c,Tbc1d9,Tbc1d10a,Dock9,Tbc1d4,Mapre2,Rapgef3,Arhgap35,Ralgapa2,Myo9a	13/253
3_Summary	GO Cellular Components	GO:0015629	actin cytoskeleton	-7.89793	-4.03368	11426,12386,17756,17916,17918,17919,18000,21957,22138,23790,26936,29875,50875,50884,66898,68813,70292,107321,108100,140781,223864,224807,225288,228550,232339,232906,234686,238021,270163,276829,319974,320878,667663,668940,18810,51810,66725,76612,212073,263406,12075,13424,16801,23969,66411,68339,71276,74237,75991,77055,677884	Macf1,Ctnna2,Map2,Myo1f,Myo5a,Myo5b,Septin2,Tnnt3,Ttn,Coro1c,Mprip,Iqgap1,Tmod3,Nckap1,Baiap2l1,Dock5,Afap1,Lpxn,Baiap2,Myh7,Rapgef3,Tmem63b,Fhod3,Itpka,Ankrd26,Arhgap35,Fhod1,Fscn2,Myo9a,Smtnl2,Auts2,Mical2,Myo3a,Myh7b,Plec,Hnrnpu,Lrrk2,Lrrc27,Syne3,Plekhg3,Bfsp1,Dync1h1,Arhgef1,Pacsin1,Tbcb,Ccdc88c,Ccdc57,Tubgcp2,Slain2,Krt76,Pakap	51/-
3_Member	GO Cellular Components	GO:0015629	actin cytoskeleton	-7.89793	-4.03368	11426,12386,17756,17916,17918,17919,18000,21957,22138,23790,26936,29875,50875,50884,66898,68813,70292,107321,108100,140781,223864,224807,225288,228550,232339,232906,234686,238021,270163,276829,319974,320878,667663,668940	Macf1,Ctnna2,Map2,Myo1f,Myo5a,Myo5b,Septin2,Tnnt3,Ttn,Coro1c,Mprip,Iqgap1,Tmod3,Nckap1,Baiap2l1,Dock5,Afap1,Lpxn,Baiap2,Myh7,Rapgef3,Tmem63b,Fhod3,Itpka,Ankrd26,Arhgap35,Fhod1,Fscn2,Myo9a,Smtnl2,Auts2,Mical2,Myo3a,Myh7b	34/505
3_Member	GO Molecular Functions	GO:0003779	actin binding	-5.95421	-2.59141	11426,12386,17756,17916,17918,17919,18810,21957,22138,23790,26936,29875,50875,51810,66725,66898,70292,76612,140781,212073,225288,234686,238021,263406,270163,320878,667663,668940	Macf1,Ctnna2,Map2,Myo1f,Myo5a,Myo5b,Plec,Tnnt3,Ttn,Coro1c,Mprip,Iqgap1,Tmod3,Hnrnpu,Lrrk2,Baiap2l1,Afap1,Lrrc27,Myh7,Syne3,Fhod3,Fhod1,Fscn2,Plekhg3,Myo9a,Mical2,Myo3a,Myh7b	28/448
3_Member	GO Molecular Functions	GO:0051015	actin filament binding	-5.64104	-2.38297	11426,12386,17916,17918,17919,18810,22138,23790,26936,29875,140781,212073,225288,234686,238021,270163,667663,668940	Macf1,Ctnna2,Myo1f,Myo5a,Myo5b,Plec,Ttn,Coro1c,Mprip,Iqgap1,Myh7,Syne3,Fhod3,Fhod1,Fscn2,Myo9a,Myo3a,Myh7b	18/219
3_Member	GO Biological Processes	GO:0030866	cortical actin cytoskeleton organization	-3.55515	-1.00232	18810,23790,29875,50884,225288,234686	Plec,Coro1c,Iqgap1,Nckap1,Fhod3,Fhod1	6/41
3_Member	GO Biological Processes	GO:0097435	supramolecular fiber organization	-3.3863	-0.879724	12075,13424,16801,17916,17918,17919,18810,21957,22138,23790,23969,29875,50875,66411,66898,68339,71276,74237,75991,77055,108100,140781,225288,238021,320878,677884	Bfsp1,Dync1h1,Arhgef1,Myo1f,Myo5a,Myo5b,Plec,Tnnt3,Ttn,Coro1c,Pacsin1,Iqgap1,Tmod3,Tbcb,Baiap2l1,Ccdc88c,Ccdc57,Tubgcp2,Slain2,Krt76,Baiap2,Myh7,Fhod3,Fscn2,Mical2,Pakap	26/562
3_Member	GO Biological Processes	GO:0030865	cortical cytoskeleton organization	-2.989	-0.688504	18810,23790,29875,50884,225288,234686	Plec,Coro1c,Iqgap1,Nckap1,Fhod3,Fhod1	6/52
3_Member	GO Biological Processes	GO:0030036	actin cytoskeleton organization	-2.78242	-0.58234	17916,17918,17919,18810,21957,22138,23790,23969,29875,50875,50884,66898,108100,140781,225288,228550,232906,234686,238021,276829,319974,320878,677884	Myo1f,Myo5a,Myo5b,Plec,Tnnt3,Ttn,Coro1c,Pacsin1,Iqgap1,Tmod3,Nckap1,Baiap2l1,Baiap2,Myh7,Fhod3,Itpka,Arhgap35,Fhod1,Fscn2,Smtnl2,Auts2,Mical2,Pakap	23/522
3_Member	GO Biological Processes	GO:0030029	actin filament-based process	-2.57251	-0.475807	17916,17918,17919,18810,21957,22138,23790,23969,29875,50875,50884,66898,68339,108100,140781,225288,228550,232906,234686,238021,276829,319974,320878,677884	Myo1f,Myo5a,Myo5b,Plec,Tnnt3,Ttn,Coro1c,Pacsin1,Iqgap1,Tmod3,Nckap1,Baiap2l1,Ccdc88c,Baiap2,Myh7,Fhod3,Itpka,Arhgap35,Fhod1,Fscn2,Smtnl2,Auts2,Mical2,Pakap	24/575
3_Member	GO Biological Processes	GO:0007015	actin filament organization	-2.27029	-0.30738	17916,17918,17919,18810,22138,23790,23969,29875,66898,108100,238021,320878,677884	Myo1f,Myo5a,Myo5b,Plec,Ttn,Coro1c,Pacsin1,Iqgap1,Baiap2l1,Baiap2,Fscn2,Mical2,Pakap	13/257
4_Summary	GO Molecular Functions	GO:0140657	ATP-dependent activity	-6.97112	-3.34507	11426,12780,13424,15505,16561,16570,17916,17918,17919,18195,19360,21973,67848,70099,72162,74591,75746,83456,104806,140781,191578,217207,218914,219189,229841,231912,270163,276950,327762,327954,328845,381917,667663,668940,672511	Macf1,Abcc2,Dync1h1,Hsph1,Kif1b,Kif3c,Myo1f,Myo5a,Myo5b,Nsf,Rad50,Top2a,Ddx55,Smc4,Dhx36,Abca12,Morc4,Mov10l1,Fancm,Myh7,Helq,Dhx8,Wapl,Vwa8,Cenpe,Katnal1,Myo9a,Slfn8,Dna2,Dnah2,Acsbg2,Dnah3,Myo3a,Myh7b,Rnf213	35/-
4_Member	GO Molecular Functions	GO:0140657	ATP-dependent activity	-6.97112	-3.34507	11426,12780,13424,15505,16561,16570,17916,17918,17919,18195,19360,21973,67848,70099,72162,74591,75746,83456,104806,140781,191578,217207,218914,219189,229841,231912,270163,276950,327762,327954,328845,381917,667663,668940,672511	Macf1,Abcc2,Dync1h1,Hsph1,Kif1b,Kif3c,Myo1f,Myo5a,Myo5b,Nsf,Rad50,Top2a,Ddx55,Smc4,Dhx36,Abca12,Morc4,Mov10l1,Fancm,Myh7,Helq,Dhx8,Wapl,Vwa8,Cenpe,Katnal1,Myo9a,Slfn8,Dna2,Dnah2,Acsbg2,Dnah3,Myo3a,Myh7b,Rnf213	35/578
4_Member	GO Molecular Functions	GO:0016887	ATP hydrolysis activity	-2.31973	-0.340504	11426,16561,16570,17919,18195,19360,70099,74591,75746,140781,219189,231912,276950,672511	Macf1,Kif1b,Kif3c,Myo5b,Nsf,Rad50,Smc4,Abca12,Morc4,Myh7,Vwa8,Katnal1,Slfn8,Rnf213	14/283
5_Summary	GO Cellular Components	GO:0032838	plasma membrane bounded cell projection cytoplasm	-6.27646	-2.71736	14634,16570,17152,17756,18000,26413,26920,51810,51938,66725,71514,74682,74934,101100,108100,207686,327954,381917,12386,17919,11497,11643,11777,13424,16348,16561,17295,17918,70989,229841,235345,319953,380654,636104,11642,19088,21844,56523,58251,68511,71132,73692,74410,171429,216274,225004,232906,232933,236266,252974,387348,71276,71972,21809,50884,73341	Gli3,Kif3c,Mak,Map2,Septin2,Mapk1,Cntrl,Hnrnpu,Ccdc39,Lrrk2,Sfpq,Wdr35,Odad2,Ttll3,Baiap2,Cfap69,Dnah2,Dnah3,Ctnna2,Myo5b,Adam3,Akap4,Ap3s1,Dync1h1,Invs,Kif1b,Met,Myo5a,Jhy,Cenpe,Hoatz,Ttll1,Cfap54,Cfap47,Akap3,Prkar2b,Tiam1,Pmfbp1,Cep295nl,Dcdc2c,Cabyr,Cplane1,Ttll11,Slc26a6,Cep290,Pcare,Arhgap35,Ccdc61,Alms1,Tspear,Tas2r120,Ccdc57,Dnmbp,Tgfb3,Nckap1,Arhgef6	56/-
5_Member	GO Cellular Components	GO:0032838	plasma membrane bounded cell projection cytoplasm	-6.27646	-2.71736	14634,16570,17152,17756,18000,26413,26920,51810,51938,66725,71514,74682,74934,101100,108100,207686,327954,381917	Gli3,Kif3c,Mak,Map2,Septin2,Mapk1,Cntrl,Hnrnpu,Ccdc39,Lrrk2,Sfpq,Wdr35,Odad2,Ttll3,Baiap2,Cfap69,Dnah2,Dnah3	18/198
5_Member	GO Cellular Components	GO:0099568	cytoplasmic region	-6.21039	-2.70928	12386,14634,16570,17152,17756,17919,18000,26413,26920,51810,51938,66725,71514,74682,74934,101100,108100,207686,327954,381917	Ctnna2,Gli3,Kif3c,Mak,Map2,Myo5b,Septin2,Mapk1,Cntrl,Hnrnpu,Ccdc39,Lrrk2,Sfpq,Wdr35,Odad2,Ttll3,Baiap2,Cfap69,Dnah2,Dnah3	20/243
5_Member	GO Biological Processes	GO:0007018	microtubule-based movement	-5.19095	-2.12917	11497,11643,11777,13424,16348,16561,16570,17152,17295,17918,51810,51938,70989,71514,74682,74934,101100,207686,229841,235345,319953,327954,380654,381917,636104	Adam3,Akap4,Ap3s1,Dync1h1,Invs,Kif1b,Kif3c,Mak,Met,Myo5a,Hnrnpu,Ccdc39,Jhy,Sfpq,Wdr35,Odad2,Ttll3,Cfap69,Cenpe,Hoatz,Ttll1,Dnah2,Cfap54,Dnah3,Cfap47	25/410
5_Member	GO Cellular Components	GO:0005929	cilium	-4.90337	-1.90685	11642,11643,14634,16348,17152,17295,17918,18000,19088,21844,26920,51938,56523,58251,68511,71132,73692,74410,74682,74934,101100,171429,207686,216274,225004,232906,232933,235345,236266,252974,319953,327954,380654,381917,387348,636104	Akap3,Akap4,Gli3,Invs,Mak,Met,Myo5a,Septin2,Prkar2b,Tiam1,Cntrl,Ccdc39,Pmfbp1,Cep295nl,Dcdc2c,Cabyr,Cplane1,Ttll11,Wdr35,Odad2,Ttll3,Slc26a6,Cfap69,Cep290,Pcare,Arhgap35,Ccdc61,Hoatz,Alms1,Tspear,Ttll1,Dnah2,Cfap54,Dnah3,Tas2r120,Cfap47	36/743
5_Member	GO Biological Processes	GO:0003341	cilium movement	-4.41071	-1.51166	11497,11643,13424,16348,17295,51938,70989,74934,101100,207686,235345,319953,327954,380654,636104	Adam3,Akap4,Dync1h1,Invs,Met,Ccdc39,Jhy,Odad2,Ttll3,Cfap69,Hoatz,Ttll1,Dnah2,Cfap54,Cfap47	15/197
5_Member	GO Biological Processes	GO:0060271	cilium assembly	-4.14275	-1.31629	11643,17152,18000,26920,51938,70989,71276,71972,73692,74682,74934,101100,207686,216274,235345,236266,319953,327954,380654,636104	Akap4,Mak,Septin2,Cntrl,Ccdc39,Jhy,Ccdc57,Dnmbp,Cplane1,Wdr35,Odad2,Ttll3,Cfap69,Cep290,Hoatz,Alms1,Ttll1,Dnah2,Cfap54,Cfap47	20/335
5_Member	GO Biological Processes	GO:0120031	plasma membrane bounded cell projection assembly	-3.88801	-1.21621	11643,17152,18000,21809,26920,50884,51938,70989,71276,71972,73341,73692,74682,74934,101100,207686,216274,235345,236266,319953,327954,380654,636104	Akap4,Mak,Septin2,Tgfb3,Cntrl,Nckap1,Ccdc39,Jhy,Ccdc57,Dnmbp,Arhgef6,Cplane1,Wdr35,Odad2,Ttll3,Cfap69,Cep290,Hoatz,Alms1,Ttll1,Dnah2,Cfap54,Cfap47	23/434
5_Member	GO Cellular Components	GO:0031514	motile cilium	-3.73081	-1.10476	11642,11643,17152,17295,18000,51938,56523,58251,68511,71132,101100,171429,207686,319953,327954,387348,636104	Akap3,Akap4,Mak,Met,Septin2,Ccdc39,Pmfbp1,Cep295nl,Dcdc2c,Cabyr,Ttll3,Slc26a6,Cfap69,Ttll1,Dnah2,Tas2r120,Cfap47	17/278
5_Member	GO Biological Processes	GO:0030031	cell projection assembly	-3.71541	-1.09654	11643,17152,18000,21809,26920,50884,51938,70989,71276,71972,73341,73692,74682,74934,101100,207686,216274,235345,236266,319953,327954,380654,636104	Akap4,Mak,Septin2,Tgfb3,Cntrl,Nckap1,Ccdc39,Jhy,Ccdc57,Dnmbp,Arhgef6,Cplane1,Wdr35,Odad2,Ttll3,Cfap69,Cep290,Hoatz,Alms1,Ttll1,Dnah2,Cfap54,Cfap47	23/446
5_Member	GO Biological Processes	GO:0044782	cilium organization	-3.55091	-1.00232	11643,17152,18000,26920,51938,70989,71276,71972,73692,74682,74934,101100,207686,216274,235345,236266,319953,327954,380654,636104	Akap4,Mak,Septin2,Cntrl,Ccdc39,Jhy,Ccdc57,Dnmbp,Cplane1,Wdr35,Odad2,Ttll3,Cfap69,Cep290,Hoatz,Alms1,Ttll1,Dnah2,Cfap54,Cfap47	20/371
5_Member	GO Biological Processes	GO:0035082	axoneme assembly	-3.42603	-0.908324	26920,51938,70989,74934,207686,235345,319953,327954,636104	Cntrl,Ccdc39,Jhy,Odad2,Cfap69,Hoatz,Ttll1,Dnah2,Cfap47	9/99
5_Member	GO Cellular Components	GO:0005930	axoneme	-3.32238	-0.852675	14634,17152,18000,26920,51938,74682,74934,101100,207686,327954,381917	Gli3,Mak,Septin2,Cntrl,Ccdc39,Wdr35,Odad2,Ttll3,Cfap69,Dnah2,Dnah3	11/147
5_Member	GO Cellular Components	GO:0097014	ciliary plasm	-3.29745	-0.832772	14634,17152,18000,26920,51938,74682,74934,101100,207686,327954,381917	Gli3,Mak,Septin2,Cntrl,Ccdc39,Wdr35,Odad2,Ttll3,Cfap69,Dnah2,Dnah3	11/148
5_Member	GO Cellular Components	GO:0097729	9+2 motile cilium	-3.2313	-0.807897	11642,11643,17295,18000,51938,56523,68511,71132,101100,171429,207686,327954,636104	Akap3,Akap4,Met,Septin2,Ccdc39,Pmfbp1,Dcdc2c,Cabyr,Ttll3,Slc26a6,Cfap69,Dnah2,Cfap47	13/200
5_Member	GO Biological Processes	GO:0001539	cilium or flagellum-dependent cell motility	-3.12932	-0.758541	11497,11643,17295,51938,101100,207686,235345,319953,327954,380654,636104	Adam3,Akap4,Met,Ccdc39,Ttll3,Cfap69,Hoatz,Ttll1,Dnah2,Cfap54,Cfap47	11/155
5_Member	GO Biological Processes	GO:0060285	cilium-dependent cell motility	-3.12932	-0.758541	11497,11643,17295,51938,101100,207686,235345,319953,327954,380654,636104	Adam3,Akap4,Met,Ccdc39,Ttll3,Cfap69,Hoatz,Ttll1,Dnah2,Cfap54,Cfap47	11/155
5_Member	GO Biological Processes	GO:0001578	microtubule bundle formation	-3.11137	-0.744595	17756,26920,51938,70989,74934,207686,235345,319953,327954,636104	Map2,Cntrl,Ccdc39,Jhy,Odad2,Cfap69,Hoatz,Ttll1,Dnah2,Cfap47	10/132
5_Member	GO Cellular Components	GO:0036126	sperm flagellum	-3.03792	-0.7056	11642,11643,17295,18000,56523,68511,71132,101100,171429,207686,327954,636104	Akap3,Akap4,Met,Septin2,Pmfbp1,Dcdc2c,Cabyr,Ttll3,Slc26a6,Cfap69,Dnah2,Cfap47	12/184
5_Member	GO Biological Processes	GO:0099111	microtubule-based transport	-2.97795	-0.687496	11777,13424,16348,16561,17152,17918,51810,51938,70989,71514,74682,319953,380654	Ap3s1,Dync1h1,Invs,Kif1b,Mak,Myo5a,Hnrnpu,Ccdc39,Jhy,Sfpq,Wdr35,Ttll1,Cfap54	13/213
5_Member	GO Biological Processes	GO:0030317	flagellated sperm motility	-2.91528	-0.650961	11497,11643,17295,51938,101100,207686,235345,319953,380654,636104	Adam3,Akap4,Met,Ccdc39,Ttll3,Cfap69,Hoatz,Ttll1,Cfap54,Cfap47	10/140
5_Member	GO Biological Processes	GO:0044458	motile cilium assembly	-2.81338	-0.599507	11643,51938,70989,207686,319953,380654,636104	Akap4,Ccdc39,Jhy,Cfap69,Ttll1,Cfap54,Cfap47	7/76
5_Member	GO Biological Processes	GO:0060294	cilium movement involved in cell motility	-2.75613	-0.572035	11497,11643,17295,51938,101100,207686,235345,319953,380654,636104	Adam3,Akap4,Met,Ccdc39,Ttll3,Cfap69,Hoatz,Ttll1,Cfap54,Cfap47	10/147
5_Member	GO Biological Processes	GO:0097722	sperm motility	-2.75613	-0.572035	11497,11643,17295,51938,101100,207686,235345,319953,380654,636104	Adam3,Akap4,Met,Ccdc39,Ttll3,Cfap69,Hoatz,Ttll1,Cfap54,Cfap47	10/147
5_Member	GO Biological Processes	GO:0003351	epithelial cilium movement involved in extracellular fluid movement	-2.54009	-0.46017	16348,51938,70989,319953,380654	Invs,Ccdc39,Jhy,Ttll1,Cfap54	5/44
5_Member	GO Biological Processes	GO:0120316	sperm flagellum assembly	-2.49684	-0.429908	11643,207686,319953,380654,636104	Akap4,Cfap69,Ttll1,Cfap54,Cfap47	5/45
5_Member	GO Biological Processes	GO:0006858	extracellular transport	-2.41381	-0.389817	16348,51938,70989,319953,380654	Invs,Ccdc39,Jhy,Ttll1,Cfap54	5/47
5_Member	GO Biological Processes	GO:0090660	cerebrospinal fluid circulation	-2.08514	-0.20598	51938,70989,380654	Ccdc39,Jhy,Cfap54	3/19
6_Summary	GO Biological Processes	GO:0000226	microtubule cytoskeleton organization	-5.98923	-2.59141	12175,12316,12695,13424,16801,17756,20843,20877,26920,51938,66411,68339,70762,70989,71276,74237,74410,74934,75991,207686,212307,216274,229841,231912,232933,235345,235626,319953,327954,338349,382543,636104,17152,19088,20403,21844,21973,51810,58251,67246,68045,68511,74682,74741,102747,104570,209683,211978,216021,226419,232339,232906,236266,276829	Bnip2,Aspm,Patj,Dync1h1,Arhgef1,Map2,Stag2,Aurkb,Cntrl,Ccdc39,Tbcb,Ccdc88c,Dclk2,Jhy,Ccdc57,Tubgcp2,Ttll11,Odad2,Slain2,Cfap69,Mapre2,Cep290,Cenpe,Katnal1,Ccdc61,Hoatz,Setd2,Ttll1,Dnah2,Cntln,Ankfn1,Cfap47,Mak,Prkar2b,Itsn2,Tiam1,Top2a,Hnrnpu,Cep295nl,Resf1,Rtraf,Dcdc2c,Wdr35,C2cd5,Lrrc49,Ppp4r3b,Ttc28,Zfyve26,Stox1,Dyrk3,Ankrd26,Arhgap35,Alms1,Smtnl2	54/-
6_Member	GO Biological Processes	GO:0000226	microtubule cytoskeleton organization	-5.98923	-2.59141	12175,12316,12695,13424,16801,17756,20843,20877,26920,51938,66411,68339,70762,70989,71276,74237,74410,74934,75991,207686,212307,216274,229841,231912,232933,235345,235626,319953,327954,338349,382543,636104	Bnip2,Aspm,Patj,Dync1h1,Arhgef1,Map2,Stag2,Aurkb,Cntrl,Ccdc39,Tbcb,Ccdc88c,Dclk2,Jhy,Ccdc57,Tubgcp2,Ttll11,Odad2,Slain2,Cfap69,Mapre2,Cep290,Cenpe,Katnal1,Ccdc61,Hoatz,Setd2,Ttll1,Dnah2,Cntln,Ankfn1,Cfap47	32/553
6_Member	GO Cellular Components	GO:0005815	microtubule organizing center	-5.43419	-2.28526	12175,12316,12695,13424,17152,19088,20403,20877,21844,21973,26920,51810,58251,67246,68045,68339,68511,71276,74237,74410,74682,74741,75991,102747,104570,209683,211978,212307,216021,216274,226419,231912,232339,232906,232933,236266,276829,319953,338349	Bnip2,Aspm,Patj,Dync1h1,Mak,Prkar2b,Itsn2,Aurkb,Tiam1,Top2a,Cntrl,Hnrnpu,Cep295nl,Resf1,Rtraf,Ccdc88c,Dcdc2c,Ccdc57,Tubgcp2,Ttll11,Wdr35,C2cd5,Slain2,Lrrc49,Ppp4r3b,Ttc28,Zfyve26,Mapre2,Stox1,Cep290,Dyrk3,Katnal1,Ankrd26,Arhgap35,Ccdc61,Alms1,Smtnl2,Ttll1,Cntln	39/792
6_Member	GO Cellular Components	GO:0005813	centrosome	-3.73542	-1.10476	12175,12316,12695,13424,17152,19088,20403,20877,21844,26920,51810,58251,68045,68339,71276,74237,74682,74741,75991,102747,104570,209683,211978,216021,216274,226419,232339,232933,236266,338349	Bnip2,Aspm,Patj,Dync1h1,Mak,Prkar2b,Itsn2,Aurkb,Tiam1,Cntrl,Hnrnpu,Cep295nl,Rtraf,Ccdc88c,Ccdc57,Tubgcp2,Wdr35,C2cd5,Slain2,Lrrc49,Ppp4r3b,Ttc28,Zfyve26,Stox1,Cep290,Dyrk3,Ankrd26,Ccdc61,Alms1,Cntln	30/656
7_Summary	GO Molecular Functions	GO:0140993	histone modifying activity	-5.83359	-2.50857	15184,18602,18676,20592,20877,20937,22385,23808,68729,74319,77630,109331,208043,217031,235626,268936,320713,12419,15331,18432,51810,52463,66213,66311,66471,70127,71514,72057,104271,114642,116871,229841,238247,21372,214498,382207,15258,17152,17938,21411,64898,68879,216874,226169,107321	Hdac5,Padi4,Phf2,Kdm5d,Aurkb,Suv39h1,Baz1b,Ash2l,Trim37,Mettl23,Prdm8,Rnf20,Setd1b,Tada2a,Setd2,Brpf3,Mysm1,Cbx5,Hmgn2,Mybbp1a,Hnrnpu,Tet1,Med7,Cenpw,Anp32e,Dpf3,Sfpq,Phf10,Tex15,Brdt,Mta3,Cenpe,Arid4a,Tbl1x,Cdc73,Jade3,Hipk2,Mak,Naca,Tcf20,Lpin2,Prpf6,Camta2,Pprc1,Lpxn	45/-
7_Member	GO Molecular Functions	GO:0140993	histone modifying activity	-5.83359	-2.50857	15184,18602,18676,20592,20877,20937,22385,23808,68729,74319,77630,109331,208043,217031,235626,268936,320713	Hdac5,Padi4,Phf2,Kdm5d,Aurkb,Suv39h1,Baz1b,Ash2l,Trim37,Mettl23,Prdm8,Rnf20,Setd1b,Tada2a,Setd2,Brpf3,Mysm1	17/191
7_Member	GO Biological Processes	GO:0071824	protein-DNA complex organization	-3.22983	-0.807897	12419,15184,15331,18432,18602,18676,20592,20937,22385,23808,51810,52463,66213,66311,66471,68729,70127,71514,72057,74319,104271,109331,114642,116871,208043,217031,229841,235626,238247,268936,320713	Cbx5,Hdac5,Hmgn2,Mybbp1a,Padi4,Phf2,Kdm5d,Suv39h1,Baz1b,Ash2l,Hnrnpu,Tet1,Med7,Cenpw,Anp32e,Trim37,Dpf3,Sfpq,Phf10,Mettl23,Tex15,Rnf20,Brdt,Mta3,Setd1b,Tada2a,Cenpe,Setd2,Arid4a,Brpf3,Mysm1	31/736
7_Member	GO Biological Processes	GO:0006325	chromatin organization	-3.05634	-0.720328	12419,15184,15331,18432,18602,18676,20592,20937,22385,23808,51810,52463,66471,68729,70127,71514,72057,74319,104271,109331,114642,116871,208043,217031,235626,238247,268936,320713	Cbx5,Hdac5,Hmgn2,Mybbp1a,Padi4,Phf2,Kdm5d,Suv39h1,Baz1b,Ash2l,Hnrnpu,Tet1,Anp32e,Trim37,Dpf3,Sfpq,Phf10,Mettl23,Tex15,Rnf20,Brdt,Mta3,Setd1b,Tada2a,Setd2,Arid4a,Brpf3,Mysm1	28/656
7_Member	GO Biological Processes	GO:0006338	chromatin remodeling	-3.01615	-0.698071	15184,18432,18602,18676,20592,20937,22385,23808,51810,52463,68729,70127,71514,72057,104271,109331,114642,116871,217031,235626,238247,320713	Hdac5,Mybbp1a,Padi4,Phf2,Kdm5d,Suv39h1,Baz1b,Ash2l,Hnrnpu,Tet1,Trim37,Dpf3,Sfpq,Phf10,Tex15,Rnf20,Brdt,Mta3,Tada2a,Setd2,Arid4a,Mysm1	22/470
7_Member	GO Biological Processes	GO:0016570	histone modification	-2.79827	-0.590865	15184,18602,20937,21372,23808,68729,109331,116871,208043,214498,217031,235626,382207	Hdac5,Padi4,Suv39h1,Tbl1x,Ash2l,Trim37,Rnf20,Mta3,Setd1b,Cdc73,Tada2a,Setd2,Jade3	13/223
7_Member	GO Molecular Functions	GO:0003713	transcription coactivator activity	-2.58781	-0.484639	15258,17152,17938,18676,21411,64898,68729,68879,109331,116871,216874,217031,226169,320713	Hipk2,Mak,Naca,Phf2,Tcf20,Lpin2,Trim37,Prpf6,Rnf20,Mta3,Camta2,Tada2a,Pprc1,Mysm1	14/264
7_Member	GO Molecular Functions	GO:0003712	transcription coregulator activity	-2.52027	-0.444999	15184,15258,17152,17938,18432,18676,21372,21411,51810,64898,66213,68729,68879,77630,107321,109331,116871,216874,217031,226169,320713	Hdac5,Hipk2,Mak,Naca,Mybbp1a,Phf2,Tbl1x,Tcf20,Hnrnpu,Lpin2,Med7,Trim37,Prpf6,Prdm8,Lpxn,Rnf20,Mta3,Camta2,Tada2a,Pprc1,Mysm1	21/483
8_Summary	GO Biological Processes	GO:0051301	cell division	-5.77658	-2.48632	12237,12316,13424,13560,16798,18000,18810,20843,20877,21973,26920,29875,51810,63955,64143,66311,70099,72124,74075,74222,74769,209086,209683,211978,212307,216021,218914,226419,229841,671232,12175,17152,21372,68045,71276,74237,217031,231912,382543,73844,98956	Bub3,Aspm,Dync1h1,E4f1,Lats1,Septin2,Plec,Stag2,Aurkb,Top2a,Cntrl,Iqgap1,Hnrnpu,Cables1,Ralb,Cenpw,Smc4,Seh1l,Syce1,Septin14,Pik3cb,Samd9l,Ttc28,Zfyve26,Mapre2,Stox1,Wapl,Dyrk3,Cenpe,Topaz1,Bnip2,Mak,Tbl1x,Rtraf,Ccdc57,Tubgcp2,Tada2a,Katnal1,Ankfn1,Ankrd45,Nat10	41/-
8_Member	GO Biological Processes	GO:0051301	cell division	-5.77658	-2.48632	12237,12316,13424,13560,16798,18000,18810,20843,20877,21973,26920,29875,51810,63955,64143,66311,70099,72124,74075,74222,74769,209086,209683,211978,212307,216021,218914,226419,229841,671232	Bub3,Aspm,Dync1h1,E4f1,Lats1,Septin2,Plec,Stag2,Aurkb,Top2a,Cntrl,Iqgap1,Hnrnpu,Cables1,Ralb,Cenpw,Smc4,Seh1l,Syce1,Septin14,Pik3cb,Samd9l,Ttc28,Zfyve26,Mapre2,Stox1,Wapl,Dyrk3,Cenpe,Topaz1	30/511
8_Member	GO Cellular Components	GO:0005819	spindle	-4.15944	-1.31629	12175,12316,13560,16798,17152,18000,20843,20877,21372,26920,51810,68045,71276,74237,209683,212307,217031,218914,229841,231912,382543	Bnip2,Aspm,E4f1,Lats1,Mak,Septin2,Stag2,Aurkb,Tbl1x,Cntrl,Hnrnpu,Rtraf,Ccdc57,Tubgcp2,Ttc28,Mapre2,Tada2a,Wapl,Cenpe,Katnal1,Ankfn1	21/361
8_Member	GO Cellular Components	GO:0030496	midbody	-3.21096	-0.793529	12316,17152,18000,20877,29875,51810,64143,73844,74769,98956,209683,211978,229841	Aspm,Mak,Septin2,Aurkb,Iqgap1,Hnrnpu,Ralb,Ankrd45,Pik3cb,Nat10,Ttc28,Zfyve26,Cenpe	13/201
8_Member	GO Cellular Components	GO:0072686	mitotic spindle	-3.14279	-0.758541	12316,17152,20843,20877,21372,26920,51810,68045,209683,217031,218914,229841	Aspm,Mak,Stag2,Aurkb,Tbl1x,Cntrl,Hnrnpu,Rtraf,Ttc28,Tada2a,Wapl,Cenpe	12/179
8_Member	GO Cellular Components	GO:0097431	mitotic spindle pole	-2.72603	-0.55228	12316,20843,20877,26920,209683	Aspm,Stag2,Aurkb,Cntrl,Ttc28	5/40
8_Member	GO Cellular Components	GO:0000922	spindle pole	-2.27061	-0.30738	12175,12316,16798,20843,20877,26920,74237,209683,231912	Bnip2,Aspm,Lats1,Stag2,Aurkb,Cntrl,Tubgcp2,Ttc28,Katnal1	9/145
9_Summary	GO Molecular Functions	GO:0003774	cytoskeletal motor activity	-5.57674	-2.34863	13424,16561,16570,17916,17918,17919,140781,229841,270163,327954,381917,667663,668940,22138,21957,12316,16348,17756,29875,110876,228550,11777,17152,51810,68339,71514,74682,77097	Dync1h1,Kif1b,Kif3c,Myo1f,Myo5a,Myo5b,Myh7,Cenpe,Myo9a,Dnah2,Dnah3,Myo3a,Myh7b,Ttn,Tnnt3,Aspm,Invs,Map2,Iqgap1,Scn2a,Itpka,Ap3s1,Mak,Hnrnpu,Ccdc88c,Sfpq,Wdr35,Tanc2	28/-
9_Member	GO Molecular Functions	GO:0003774	cytoskeletal motor activity	-5.57674	-2.34863	13424,16561,16570,17916,17918,17919,140781,229841,270163,327954,381917,667663,668940	Dync1h1,Kif1b,Kif3c,Myo1f,Myo5a,Myo5b,Myh7,Cenpe,Myo9a,Dnah2,Dnah3,Myo3a,Myh7b	13/119
9_Member	GO Molecular Functions	GO:0000146	microfilament motor activity	-4.81595	-1.84311	17916,17918,17919,140781,270163,667663,668940	Myo1f,Myo5a,Myo5b,Myh7,Myo9a,Myo3a,Myh7b	7/37
9_Member	GO Cellular Components	GO:0016459	myosin complex	-4.49009	-1.56301	17916,17918,17919,22138,140781,270163,667663,668940	Myo1f,Myo5a,Myo5b,Ttn,Myh7,Myo9a,Myo3a,Myh7b	8/56
9_Member	KEGG Pathway	mmu04814	Motor proteins - Mus musculus (house mouse)	-3.8594	-1.19556	13424,16561,16570,17916,17918,17919,21957,140781,229841,270163,327954,381917,667663,668940	Dync1h1,Kif1b,Kif3c,Myo1f,Myo5a,Myo5b,Tnnt3,Myh7,Cenpe,Myo9a,Dnah2,Dnah3,Myo3a,Myh7b	14/196
9_Member	GO Molecular Functions	GO:0005516	calmodulin binding	-2.84014	-0.609123	12316,16348,17756,17916,17918,17919,22138,29875,110876,140781,228550,667663	Aspm,Invs,Map2,Myo1f,Myo5a,Myo5b,Ttn,Iqgap1,Scn2a,Myh7,Itpka,Myo3a	12/194
9_Member	GO Biological Processes	GO:0030705	cytoskeleton-dependent intracellular transport	-2.63934	-0.506977	11777,13424,16561,17152,17916,17918,17919,51810,68339,71514,74682,77097	Ap3s1,Dync1h1,Kif1b,Mak,Myo1f,Myo5a,Myo5b,Hnrnpu,Ccdc88c,Sfpq,Wdr35,Tanc2	12/205
9_Member	GO Biological Processes	GO:0099518	vesicle cytoskeletal trafficking	-2.38826	-0.378506	11777,16561,17916,17918,17919,77097	Ap3s1,Kif1b,Myo1f,Myo5a,Myo5b,Tanc2	6/68
9_Member	GO Biological Processes	GO:0032252	secretory granule localization	-2.38473	-0.378471	16561,17918,77097	Kif1b,Myo5a,Tanc2	3/15
9_Member	GO Cellular Components	GO:0098871	postsynaptic actin cytoskeleton	-2.30175	-0.327299	17918,17919,228550	Myo5a,Myo5b,Itpka	3/16
9_Member	GO Biological Processes	GO:0030050	vesicle transport along actin filament	-2.02171	-0.170181	17916,17918,17919	Myo1f,Myo5a,Myo5b	3/20
10_Summary	GO Biological Processes	GO:0033044	regulation of chromosome organization	-5.54541	-2.34533	12237,14156,19360,20877,21973,22385,26413,50505,51810,67246,70099,70127,71514,72057,72162,98956,218914,229512,229841	Bub3,Fen1,Rad50,Aurkb,Top2a,Baz1b,Mapk1,Ercc4,Hnrnpu,Resf1,Smc4,Dpf3,Sfpq,Phf10,Dhx36,Nat10,Wapl,Smg5,Cenpe	19/-
10_Member	GO Biological Processes	GO:0033044	regulation of chromosome organization	-5.54541	-2.34533	12237,14156,19360,20877,21973,22385,26413,50505,51810,67246,70099,70127,71514,72057,72162,98956,218914,229512,229841	Bub3,Fen1,Rad50,Aurkb,Top2a,Baz1b,Mapk1,Ercc4,Hnrnpu,Resf1,Smc4,Dpf3,Sfpq,Phf10,Dhx36,Nat10,Wapl,Smg5,Cenpe	19/245
10_Member	GO Biological Processes	GO:2001251	negative regulation of chromosome organization	-4.01128	-1.26029	12237,19360,21973,22385,50505,51810,98956,218914,229841	Bub3,Rad50,Top2a,Baz1b,Ercc4,Hnrnpu,Nat10,Wapl,Cenpe	9/83
10_Member	GO Biological Processes	GO:0032204	regulation of telomere maintenance	-2.85692	-0.620032	19360,20877,26413,50505,51810,72162,98956,229512	Rad50,Aurkb,Mapk1,Ercc4,Hnrnpu,Dhx36,Nat10,Smg5	8/96
10_Member	GO Biological Processes	GO:1904356	regulation of telomere maintenance via telomere lengthening	-2.70086	-0.537208	20877,26413,50505,51810,72162,98956	Aurkb,Mapk1,Ercc4,Hnrnpu,Dhx36,Nat10	6/59
10_Member	GO Biological Processes	GO:1904353	regulation of telomere capping	-2.60439	-0.487992	19360,20877,26413,50505	Rad50,Aurkb,Mapk1,Ercc4	4/26
10_Member	GO Biological Processes	GO:0032205	negative regulation of telomere maintenance	-2.12853	-0.228122	19360,50505,51810,98956	Rad50,Ercc4,Hnrnpu,Nat10	4/35
11_Summary	GO Biological Processes	GO:0010564	regulation of cell cycle process	-5.45224	-2.28526	12237,12952,13134,13424,13560,13645,14156,14179,17295,18432,19360,20877,20913,22385,27103,50875,51810,58251,67490,68729,70099,70127,71514,72057,83946,98956,116871,208583,211978,214498,216021,218914,226419,229841,235626,236266,327762,26413,19023,71276	Bub3,Cry1,Dach1,Dync1h1,E4f1,Egf,Fen1,Fgf8,Met,Mybbp1a,Rad50,Aurkb,Stxbp4,Baz1b,Eif2ak4,Tmod3,Hnrnpu,Cep295nl,Ufl1,Trim37,Smc4,Dpf3,Sfpq,Phf10,Phip,Nat10,Mta3,Nek11,Zfyve26,Cdc73,Stox1,Wapl,Dyrk3,Cenpe,Setd2,Alms1,Dna2,Mapk1,Ppef2,Ccdc57	40/-
11_Member	GO Biological Processes	GO:0010564	regulation of cell cycle process	-5.45224	-2.28526	12237,12952,13134,13424,13560,13645,14156,14179,17295,18432,19360,20877,20913,22385,27103,50875,51810,58251,67490,68729,70099,70127,71514,72057,83946,98956,116871,208583,211978,214498,216021,218914,226419,229841,235626,236266,327762	Bub3,Cry1,Dach1,Dync1h1,E4f1,Egf,Fen1,Fgf8,Met,Mybbp1a,Rad50,Aurkb,Stxbp4,Baz1b,Eif2ak4,Tmod3,Hnrnpu,Cep295nl,Ufl1,Trim37,Smc4,Dpf3,Sfpq,Phf10,Phip,Nat10,Mta3,Nek11,Zfyve26,Cdc73,Stox1,Wapl,Dyrk3,Cenpe,Setd2,Alms1,Dna2	37/731
11_Member	GO Biological Processes	GO:0090068	positive regulation of cell cycle process	-4.06096	-1.29023	13424,13645,14156,14179,17295,20877,20913,50875,51810,70099,71514,83946,116871,214498,216021,226419,229841	Dync1h1,Egf,Fen1,Fgf8,Met,Aurkb,Stxbp4,Tmod3,Hnrnpu,Smc4,Sfpq,Phip,Mta3,Cdc73,Stox1,Dyrk3,Cenpe	17/261
11_Member	GO Biological Processes	GO:0010800	positive regulation of peptidyl-threonine phosphorylation	-3.24254	-0.807897	13645,17295,26413,83946,216021	Egf,Met,Mapk1,Phip,Stox1	5/31
11_Member	GO Biological Processes	GO:0010799	regulation of peptidyl-threonine phosphorylation	-3.08032	-0.727843	13645,17295,19023,26413,83946,216021	Egf,Met,Ppef2,Mapk1,Phip,Stox1	6/50
11_Member	GO Biological Processes	GO:0045787	positive regulation of cell cycle	-3.01702	-0.698071	13424,13645,14156,14179,17295,20877,20913,50875,51810,70099,71276,71514,83946,116871,214498,216021,226419,229841	Dync1h1,Egf,Fen1,Fgf8,Met,Aurkb,Stxbp4,Tmod3,Hnrnpu,Smc4,Ccdc57,Sfpq,Phip,Mta3,Cdc73,Stox1,Dyrk3,Cenpe	18/350
11_Member	GO Biological Processes	GO:0045840	positive regulation of mitotic nuclear division	-2.45476	-0.414241	13645,14179,17295,83946,229841	Egf,Fgf8,Met,Phip,Cenpe	5/46
12_Summary	GO Biological Processes	GO:0010638	positive regulation of organelle organization	-5.40851	-2.28306	12362,13424,13645,14156,14179,17295,19360,20877,20980,21809,26413,50884,64143,65114,66898,67246,70099,71514,72162,74374,74682,74741,75991,83946,108100,223864,229841,232906,234686,329015	Casp1,Dync1h1,Egf,Fen1,Fgf8,Met,Rad50,Aurkb,Syt2,Tgfb3,Mapk1,Nckap1,Ralb,Vps35,Baiap2l1,Resf1,Smc4,Sfpq,Dhx36,Clec16a,Wdr35,C2cd5,Slain2,Phip,Baiap2,Rapgef3,Cenpe,Arhgap35,Fhod1,Atg2a	30/-
12_Member	GO Biological Processes	GO:0010638	positive regulation of organelle organization	-5.40851	-2.28306	12362,13424,13645,14156,14179,17295,19360,20877,20980,21809,26413,50884,64143,65114,66898,67246,70099,71514,72162,74374,74682,74741,75991,83946,108100,223864,229841,232906,234686,329015	Casp1,Dync1h1,Egf,Fen1,Fgf8,Met,Rad50,Aurkb,Syt2,Tgfb3,Mapk1,Nckap1,Ralb,Vps35,Baiap2l1,Resf1,Smc4,Sfpq,Dhx36,Clec16a,Wdr35,C2cd5,Slain2,Phip,Baiap2,Rapgef3,Cenpe,Arhgap35,Fhod1,Atg2a	30/533
12_Member	GO Biological Processes	GO:2001252	positive regulation of chromosome organization	-2.53321	-0.455344	14156,19360,20877,26413,67246,70099,71514,72162	Fen1,Rad50,Aurkb,Mapk1,Resf1,Smc4,Sfpq,Dhx36	8/108
13_Summary	GO Molecular Functions	GO:0016773	phosphotransferase activity, alcohol group as acceptor	-5.34409	-2.24091	11790,11836,12305,15258,16798,17152,17295,17776,18607,20877,22138,22385,23972,26413,27103,29869,66725,69719,70762,74769,75678,107650,208583,217480,225724,226419,228026,228550,234878,235582,238564,269224,320119,399510,667663,67426,13645,16348,83946,170743	Speg,Araf,Ddr1,Hipk2,Lats1,Mak,Met,Mast2,Pdpk1,Aurkb,Ttn,Baz1b,Papss2,Mapk1,Eif2ak4,Ulk2,Lrrk2,Cad,Dclk2,Pik3cb,Ippk,Pi4kb,Nek11,Dgkb,Mapk4,Dyrk3,Pdk1,Itpka,Map3k21,Glyctk,Mylk4,Pask,Rps6kc1,Map4k5,Myo3a,Coq8a,Egf,Invs,Phip,Tlr7	40/-
13_Member	GO Molecular Functions	GO:0016773	phosphotransferase activity, alcohol group as acceptor	-5.34409	-2.24091	11790,11836,12305,15258,16798,17152,17295,17776,18607,20877,22138,22385,23972,26413,27103,29869,66725,69719,70762,74769,75678,107650,208583,217480,225724,226419,228026,228550,234878,235582,238564,269224,320119,399510,667663	Speg,Araf,Ddr1,Hipk2,Lats1,Mak,Met,Mast2,Pdpk1,Aurkb,Ttn,Baz1b,Papss2,Mapk1,Eif2ak4,Ulk2,Lrrk2,Cad,Dclk2,Pik3cb,Ippk,Pi4kb,Nek11,Dgkb,Mapk4,Dyrk3,Pdk1,Itpka,Map3k21,Glyctk,Mylk4,Pask,Rps6kc1,Map4k5,Myo3a	35/680
13_Member	GO Molecular Functions	GO:0004674	protein serine/threonine kinase activity	-5.11447	-2.072	11790,11836,15258,16798,17152,17776,18607,20877,22138,26413,27103,29869,66725,70762,74769,208583,225724,226419,228026,228550,234878,238564,269224,320119,399510,667663	Speg,Araf,Hipk2,Lats1,Mak,Mast2,Pdpk1,Aurkb,Ttn,Mapk1,Eif2ak4,Ulk2,Lrrk2,Dclk2,Pik3cb,Nek11,Mapk4,Dyrk3,Pdk1,Itpka,Map3k21,Mylk4,Pask,Rps6kc1,Map4k5,Myo3a	26/441
13_Member	GO Molecular Functions	GO:0016301	kinase activity	-5.04377	-2.01978	11790,11836,12305,15258,16798,17152,17295,17776,18607,20877,22138,22385,23972,26413,27103,29869,66725,67426,69719,70762,74769,75678,107650,208583,217480,225724,226419,228026,228550,234878,235582,238564,269224,320119,399510,667663	Speg,Araf,Ddr1,Hipk2,Lats1,Mak,Met,Mast2,Pdpk1,Aurkb,Ttn,Baz1b,Papss2,Mapk1,Eif2ak4,Ulk2,Lrrk2,Coq8a,Cad,Dclk2,Pik3cb,Ippk,Pi4kb,Nek11,Dgkb,Mapk4,Dyrk3,Pdk1,Itpka,Map3k21,Glyctk,Mylk4,Pask,Rps6kc1,Map4k5,Myo3a	36/732
13_Member	GO Molecular Functions	GO:0004672	protein kinase activity	-4.74097	-1.78392	11790,11836,12305,15258,16798,17152,17295,17776,18607,20877,22138,22385,26413,27103,29869,66725,69719,70762,74769,208583,225724,226419,228026,228550,234878,238564,269224,320119,399510,667663	Speg,Araf,Ddr1,Hipk2,Lats1,Mak,Met,Mast2,Pdpk1,Aurkb,Ttn,Baz1b,Mapk1,Eif2ak4,Ulk2,Lrrk2,Cad,Dclk2,Pik3cb,Nek11,Mapk4,Dyrk3,Pdk1,Itpka,Map3k21,Mylk4,Pask,Rps6kc1,Map4k5,Myo3a	30/577
13_Member	GO Biological Processes	GO:0006468	protein phosphorylation	-3.1911	-0.790725	11790,11836,12305,13645,15258,16348,16798,17152,17295,17776,18607,20877,22138,26413,27103,29869,66725,69719,70762,83946,170743,208583,225724,226419,228026,234878,235582,269224,320119,399510,667663	Speg,Araf,Ddr1,Egf,Hipk2,Invs,Lats1,Mak,Met,Mast2,Pdpk1,Aurkb,Ttn,Mapk1,Eif2ak4,Ulk2,Lrrk2,Cad,Dclk2,Phip,Tlr7,Nek11,Mapk4,Dyrk3,Pdk1,Map3k21,Glyctk,Pask,Rps6kc1,Map4k5,Myo3a	31/740
13_Member	GO Biological Processes	GO:0018105	peptidyl-serine phosphorylation	-3.05856	-0.720328	15258,16798,17776,18607,26413,29869,66725,70762,83946,226419,228026,667663	Hipk2,Lats1,Mast2,Pdpk1,Mapk1,Ulk2,Lrrk2,Dclk2,Phip,Dyrk3,Pdk1,Myo3a	12/183
13_Member	GO Biological Processes	GO:0018209	peptidyl-serine modification	-2.69247	-0.532173	15258,16798,17776,18607,26413,29869,66725,70762,83946,226419,228026,667663	Hipk2,Lats1,Mast2,Pdpk1,Mapk1,Ulk2,Lrrk2,Dclk2,Phip,Dyrk3,Pdk1,Myo3a	12/202
13_Member	GO Biological Processes	GO:0018107	peptidyl-threonine phosphorylation	-2.35682	-0.364242	15258,26413,66725,69719,226419,667663	Hipk2,Mapk1,Lrrk2,Cad,Dyrk3,Myo3a	6/69
13_Member	GO Biological Processes	GO:0018210	peptidyl-threonine modification	-2.09839	-0.207405	15258,26413,66725,69719,226419,667663	Hipk2,Mapk1,Lrrk2,Cad,Dyrk3,Myo3a	6/78
14_Summary	GO Biological Processes	GO:0022604	regulation of cell morphogenesis	-5.23863	-2.15665	11426,17295,17919,18786,20403,20980,21844,23790,71972,72162,74053,83946,108100,212073,224617,228550,232906,270163,382236,677884,23969,29875,270120,14804,65114,66725,76936,77097,217480,12316,13003,14634,17158,18420,67490,242620,245446,12386,12647,17756,52463,15569	Macf1,Met,Myo5b,Plaa,Itsn2,Syt2,Tiam1,Coro1c,Dnmbp,Dhx36,Grip1,Phip,Baiap2,Syne3,Tbc1d24,Itpka,Arhgap35,Myo9a,Brwd3,Pakap,Pacsin1,Iqgap1,Fat3,Grid2,Vps35,Lrrk2,Hnrnpm,Tanc2,Dgkb,Aspm,Vcan,Gli3,Man2a1,Otp,Ufl1,Dmrta2,Slitrk4,Ctnna2,Chat,Map2,Tet1,Elavl2	42/-
14_Member	GO Biological Processes	GO:0022604	regulation of cell morphogenesis	-5.23863	-2.15665	11426,17295,17919,18786,20403,20980,21844,23790,71972,72162,74053,83946,108100,212073,224617,228550,232906,270163,382236,677884	Macf1,Met,Myo5b,Plaa,Itsn2,Syt2,Tiam1,Coro1c,Dnmbp,Dhx36,Grip1,Phip,Baiap2,Syne3,Tbc1d24,Itpka,Arhgap35,Myo9a,Brwd3,Pakap	20/281
14_Member	GO Biological Processes	GO:0050775	positive regulation of dendrite morphogenesis	-4.06418	-1.29023	17295,17919,21844,72162,74053,108100,224617,228550	Met,Myo5b,Tiam1,Dhx36,Grip1,Baiap2,Tbc1d24,Itpka	8/64
14_Member	GO Biological Processes	GO:0010770	positive regulation of cell morphogenesis involved in differentiation	-3.92115	-1.22452	17295,17919,21844,72162,74053,108100,224617,228550	Met,Myo5b,Tiam1,Dhx36,Grip1,Baiap2,Tbc1d24,Itpka	8/67
14_Member	GO Biological Processes	GO:0010769	regulation of cell morphogenesis involved in differentiation	-3.78589	-1.13756	17295,17919,21844,72162,74053,108100,224617,228550	Met,Myo5b,Tiam1,Dhx36,Grip1,Baiap2,Tbc1d24,Itpka	8/70
14_Member	GO Biological Processes	GO:0050773	regulation of dendrite development	-3.37294	-0.874094	17295,17919,21844,23969,29875,72162,74053,108100,224617,228550,270120	Met,Myo5b,Tiam1,Pacsin1,Iqgap1,Dhx36,Grip1,Baiap2,Tbc1d24,Itpka,Fat3	11/145
14_Member	GO Biological Processes	GO:0099175	regulation of postsynapse organization	-2.93893	-0.662332	14804,21844,65114,66725,72162,76936,77097,108100,217480,228550	Grid2,Tiam1,Vps35,Lrrk2,Dhx36,Hnrnpm,Tanc2,Baiap2,Dgkb,Itpka	10/139
14_Member	GO Biological Processes	GO:0048814	regulation of dendrite morphogenesis	-2.77107	-0.579058	17295,17919,21844,72162,74053,108100,224617,228550	Met,Myo5b,Tiam1,Dhx36,Grip1,Baiap2,Tbc1d24,Itpka	8/99
14_Member	GO Biological Processes	GO:0061001	regulation of dendritic spine morphogenesis	-2.70086	-0.537208	21844,66725,72162,77097,108100,228550	Tiam1,Lrrk2,Dhx36,Tanc2,Baiap2,Itpka	6/59
14_Member	GO Biological Processes	GO:0050769	positive regulation of neurogenesis	-2.51479	-0.444999	11426,12316,13003,14634,17158,17295,17919,18420,21844,67490,72162,74053,108100,224617,228550,242620	Macf1,Aspm,Vcan,Gli3,Man2a1,Met,Myo5b,Otp,Tiam1,Ufl1,Dhx36,Grip1,Baiap2,Tbc1d24,Itpka,Dmrta2	16/328
14_Member	GO Biological Processes	GO:0051962	positive regulation of nervous system development	-2.51475	-0.444999	11426,12316,13003,14634,14804,17158,17295,17919,18420,21844,67490,72162,74053,108100,224617,228550,242620,245446	Macf1,Aspm,Vcan,Gli3,Grid2,Man2a1,Met,Myo5b,Otp,Tiam1,Ufl1,Dhx36,Grip1,Baiap2,Tbc1d24,Itpka,Dmrta2,Slitrk4	18/389
14_Member	GO Biological Processes	GO:0061003	positive regulation of dendritic spine morphogenesis	-2.37171	-0.372342	21844,72162,108100,228550	Tiam1,Dhx36,Baiap2,Itpka	4/30
14_Member	GO Biological Processes	GO:0016358	dendrite development	-2.19482	-0.264833	12386,12647,17756,17919,52463,74053,108100,224617,270120	Ctnna2,Chat,Map2,Myo5b,Tet1,Grip1,Baiap2,Tbc1d24,Fat3	9/149
14_Member	GO Biological Processes	GO:0099159	regulation of modification of postsynaptic structure	-2.1526	-0.249155	17919,21844,108100	Myo5b,Tiam1,Baiap2	3/18
14_Member	GO Biological Processes	GO:0050807	regulation of synapse organization	-2.04447	-0.180224	12386,14804,15569,17919,21844,65114,66725,72162,76936,77097,108100,217480,228550,245446	Ctnna2,Grid2,Elavl2,Myo5b,Tiam1,Vps35,Lrrk2,Dhx36,Hnrnpm,Tanc2,Baiap2,Dgkb,Itpka,Slitrk4	14/305
15_Summary	GO Biological Processes	GO:0051129	negative regulation of cellular component organization	-4.89608	-1.90685	12237,12386,16392,16976,17152,17295,17756,18676,19360,21973,22385,23790,23969,29869,50505,50875,50877,51810,52463,65114,66725,68729,74374,94232,98956,106583,108151,209743,210789,218914,223864,225288,229841,233781,270120,100502698,100534273	Bub3,Ctnna2,Isl1,Lrpap1,Mak,Met,Map2,Phf2,Rad50,Top2a,Baz1b,Coro1c,Pacsin1,Ulk2,Ercc4,Tmod3,Neu3,Hnrnpu,Tet1,Vps35,Lrrk2,Trim37,Clec16a,Ubqln4,Nat10,Scaf8,Sema3d,Minar1,Tbc1d4,Wapl,Rapgef3,Fhod3,Cenpe,Xylt1,Fat3,Rubcn,Fer1l5	37/-
15_Member	GO Biological Processes	GO:0051129	negative regulation of cellular component organization	-4.89608	-1.90685	12237,12386,16392,16976,17152,17295,17756,18676,19360,21973,22385,23790,23969,29869,50505,50875,50877,51810,52463,65114,66725,68729,74374,94232,98956,106583,108151,209743,210789,218914,223864,225288,229841,233781,270120,100502698,100534273	Bub3,Ctnna2,Isl1,Lrpap1,Mak,Met,Map2,Phf2,Rad50,Top2a,Baz1b,Coro1c,Pacsin1,Ulk2,Ercc4,Tmod3,Neu3,Hnrnpu,Tet1,Vps35,Lrrk2,Trim37,Clec16a,Ubqln4,Nat10,Scaf8,Sema3d,Minar1,Tbc1d4,Wapl,Rapgef3,Fhod3,Cenpe,Xylt1,Fat3,Rubcn,Fer1l5	37/774
15_Member	GO Biological Processes	GO:0010639	negative regulation of organelle organization	-3.23101	-0.807897	12237,12386,17152,17295,17756,19360,21973,22385,50505,50875,51810,66725,68729,74374,98956,210789,218914,225288,229841	Bub3,Ctnna2,Mak,Met,Map2,Rad50,Top2a,Baz1b,Ercc4,Tmod3,Hnrnpu,Lrrk2,Trim37,Clec16a,Nat10,Tbc1d4,Wapl,Fhod3,Cenpe	19/364
16_Summary	GO Biological Processes	GO:0098813	nuclear chromosome segregation	-4.63192	-1.69012	12237,12316,16798,20843,20877,21973,50505,59014,70099,72124,74075,104271,104806,218914,229841,232933,320022,13424,18810,21957,22138,50875,66311,68813,71276,74237,140781,212307,225288,226562,672511,14179,74068,83456,114642,23790,19360,20937,24127,71514,72162,72960,327762,545725,29875,50496,63955,116871,208583,211978,217031,235626,382543,19088,216274,236266	Bub3,Aspm,Lats1,Stag2,Aurkb,Top2a,Ercc4,Rrs1,Smc4,Seh1l,Syce1,Tex15,Fancm,Wapl,Cenpe,Ccdc61,Terb1,Dync1h1,Plec,Tnnt3,Ttn,Tmod3,Cenpw,Dock5,Ccdc57,Tubgcp2,Myh7,Mapre2,Fhod3,Prrc2c,Rnf213,Fgf8,Asz1,Mov10l1,Brdt,Coro1c,Rad50,Suv39h1,Xrn1,Sfpq,Dhx36,Top1mt,Dna2,Mterf1a,Iqgap1,E2f6,Cables1,Mta3,Nek11,Zfyve26,Tada2a,Setd2,Ankfn1,Prkar2b,Cep290,Alms1	56/-
16_Member	GO Biological Processes	GO:0098813	nuclear chromosome segregation	-4.63192	-1.69012	12237,12316,16798,20843,20877,21973,50505,59014,70099,72124,74075,104271,104806,218914,229841,232933,320022	Bub3,Aspm,Lats1,Stag2,Aurkb,Top2a,Ercc4,Rrs1,Smc4,Seh1l,Syce1,Tex15,Fancm,Wapl,Cenpe,Ccdc61,Terb1	17/235
16_Member	GO Biological Processes	GO:0140694	non-membrane-bounded organelle assembly	-4.36247	-1.47679	12316,13424,18810,20843,20877,21957,22138,50875,59014,66311,68813,71276,74237,140781,212307,225288,226562,229841,232933,672511	Aspm,Dync1h1,Plec,Stag2,Aurkb,Tnnt3,Ttn,Tmod3,Rrs1,Cenpw,Dock5,Ccdc57,Tubgcp2,Myh7,Mapre2,Fhod3,Prrc2c,Cenpe,Ccdc61,Rnf213	20/323
16_Member	GO Biological Processes	GO:0007059	chromosome segregation	-4.325	-1.45228	12237,12316,16798,20843,20877,21973,50505,59014,66311,70099,72124,74075,74237,104271,104806,212307,218914,229841,232933,320022	Bub3,Aspm,Lats1,Stag2,Aurkb,Top2a,Ercc4,Rrs1,Cenpw,Smc4,Seh1l,Syce1,Tubgcp2,Tex15,Fancm,Mapre2,Wapl,Cenpe,Ccdc61,Terb1	20/325
16_Member	GO Biological Processes	GO:0000280	nuclear division	-4.07774	-1.29023	12316,14179,20843,20877,21973,50505,59014,70099,72124,74068,74075,83456,104271,104806,114642,218914,229841,232933,320022	Aspm,Fgf8,Stag2,Aurkb,Top2a,Ercc4,Rrs1,Smc4,Seh1l,Asz1,Syce1,Mov10l1,Tex15,Fancm,Brdt,Wapl,Cenpe,Ccdc61,Terb1	19/312
16_Member	GO Biological Processes	GO:0048285	organelle fission	-4.07216	-1.29023	12316,14179,20843,20877,21973,23790,50505,59014,70099,72124,74068,74075,83456,104271,104806,114642,218914,229841,232933,320022	Aspm,Fgf8,Stag2,Aurkb,Top2a,Coro1c,Ercc4,Rrs1,Smc4,Seh1l,Asz1,Syce1,Mov10l1,Tex15,Fancm,Brdt,Wapl,Cenpe,Ccdc61,Terb1	20/339
16_Member	GO Biological Processes	GO:0051276	chromosome organization	-3.96227	-1.23931	16798,19360,20843,20877,20937,21973,24127,50505,59014,66311,70099,71514,72124,72162,72960,74075,104271,218914,229841,232933,320022,327762,545725	Lats1,Rad50,Stag2,Aurkb,Suv39h1,Top2a,Xrn1,Ercc4,Rrs1,Cenpw,Smc4,Sfpq,Seh1l,Dhx36,Top1mt,Syce1,Tex15,Wapl,Cenpe,Ccdc61,Terb1,Dna2,Mterf1a	23/429
16_Member	GO Biological Processes	GO:0000278	mitotic cell cycle	-3.54919	-1.00232	12237,13424,14179,16798,19360,20843,20877,29875,50496,50875,59014,63955,66311,70099,71276,72124,74237,116871,208583,211978,217031,218914,229841,232933,235626,327762,382543	Bub3,Dync1h1,Fgf8,Lats1,Rad50,Stag2,Aurkb,Iqgap1,E2f6,Tmod3,Rrs1,Cables1,Cenpw,Smc4,Ccdc57,Seh1l,Tubgcp2,Mta3,Nek11,Zfyve26,Tada2a,Wapl,Cenpe,Ccdc61,Setd2,Dna2,Ankfn1	27/579
16_Member	GO Biological Processes	GO:1903047	mitotic cell cycle process	-3.35744	-0.87232	12237,13424,14179,16798,19360,20843,20877,29875,50496,50875,59014,63955,70099,71276,72124,116871,208583,211978,218914,229841,232933,235626,327762,382543	Bub3,Dync1h1,Fgf8,Lats1,Rad50,Stag2,Aurkb,Iqgap1,E2f6,Tmod3,Rrs1,Cables1,Smc4,Ccdc57,Seh1l,Mta3,Nek11,Zfyve26,Wapl,Cenpe,Ccdc61,Setd2,Dna2,Ankfn1	24/503
16_Member	GO Biological Processes	GO:0000819	sister chromatid segregation	-3.08597	-0.727843	16798,20843,20877,21973,59014,70099,72124,218914,229841,232933	Lats1,Stag2,Aurkb,Top2a,Rrs1,Smc4,Seh1l,Wapl,Cenpe,Ccdc61	10/133
16_Member	Reactome Gene Sets	R-MMU-68877	Mitotic Prometaphase	-2.97696	-0.687496	12237,13424,19088,20843,20877,70099,72124,74237,216274,218914,229841,236266	Bub3,Dync1h1,Prkar2b,Stag2,Aurkb,Smc4,Seh1l,Tubgcp2,Cep290,Wapl,Cenpe,Alms1	12/187
16_Member	GO Biological Processes	GO:0051225	spindle assembly	-2.34236	-0.355856	12316,20843,20877,74237,212307,229841,232933	Aspm,Stag2,Aurkb,Tubgcp2,Mapre2,Cenpe,Ccdc61	7/92
16_Member	GO Biological Processes	GO:0140014	mitotic nuclear division	-2.08659	-0.20598	14179,20843,20877,59014,70099,72124,218914,229841,232933	Fgf8,Stag2,Aurkb,Rrs1,Smc4,Seh1l,Wapl,Cenpe,Ccdc61	9/155
16_Member	GO Biological Processes	GO:0000070	mitotic sister chromatid segregation	-2.07137	-0.19544	20843,20877,59014,70099,72124,218914,229841,232933	Stag2,Aurkb,Rrs1,Smc4,Seh1l,Wapl,Cenpe,Ccdc61	8/129
17_Summary	GO Cellular Components	GO:0098687	chromosomal region	-4.4195	-1.51166	12237,12419,14156,18000,18676,19360,20843,20877,20937,21973,22385,50505,51810,66311,70099,72057,72124,72162,229841,231329,320022,327762,209683,22138,59014,74075,212307,13424	Bub3,Cbx5,Fen1,Septin2,Phf2,Rad50,Stag2,Aurkb,Suv39h1,Top2a,Baz1b,Ercc4,Hnrnpu,Cenpw,Smc4,Phf10,Seh1l,Dhx36,Cenpe,Polr2b,Terb1,Dna2,Ttc28,Ttn,Rrs1,Syce1,Mapre2,Dync1h1	28/-
17_Member	GO Cellular Components	GO:0098687	chromosomal region	-4.4195	-1.51166	12237,12419,14156,18000,18676,19360,20843,20877,20937,21973,22385,50505,51810,66311,70099,72057,72124,72162,229841,231329,320022,327762	Bub3,Cbx5,Fen1,Septin2,Phf2,Rad50,Stag2,Aurkb,Suv39h1,Top2a,Baz1b,Ercc4,Hnrnpu,Cenpw,Smc4,Phf10,Seh1l,Dhx36,Cenpe,Polr2b,Terb1,Dna2	22/373
17_Member	GO Cellular Components	GO:1990023	mitotic spindle midzone	-3.55951	-1.00232	20877,51810,209683,229841	Aurkb,Hnrnpu,Ttc28,Cenpe	4/15
17_Member	GO Cellular Components	GO:0000775	chromosome, centromeric region	-3.03043	-0.70178	12237,12419,18000,18676,20843,20877,20937,21973,22385,51810,66311,70099,72057,72124,229841	Bub3,Cbx5,Septin2,Phf2,Stag2,Aurkb,Suv39h1,Top2a,Baz1b,Hnrnpu,Cenpw,Smc4,Phf10,Seh1l,Cenpe	15/264
17_Member	GO Cellular Components	GO:0000793	condensed chromosome	-2.85999	-0.620032	12237,12419,18000,18676,19360,20877,21973,22138,22385,51810,59014,66311,70099,72057,72124,74075,229841	Bub3,Cbx5,Septin2,Phf2,Rad50,Aurkb,Top2a,Ttn,Baz1b,Hnrnpu,Rrs1,Cenpw,Smc4,Phf10,Seh1l,Syce1,Cenpe	17/332
17_Member	GO Cellular Components	GO:0051233	spindle midzone	-2.7761	-0.581412	20877,51810,209683,212307,229841	Aurkb,Hnrnpu,Ttc28,Mapre2,Cenpe	5/39
17_Member	GO Biological Processes	GO:0051987	positive regulation of attachment of spindle microtubules to kinetochore	-2.6787	-0.532173	20877,51810,229841	Aurkb,Hnrnpu,Cenpe	3/12
17_Member	GO Biological Processes	GO:0090235	regulation of metaphase plate congression	-2.47444	-0.426267	13424,20877,51810	Dync1h1,Aurkb,Hnrnpu	3/14
17_Member	GO Biological Processes	GO:0051984	positive regulation of chromosome segregation	-2.42624	-0.394049	20877,51810,70099,229841	Aurkb,Hnrnpu,Smc4,Cenpe	4/29
17_Member	GO Cellular Components	GO:0000776	kinetochore	-2.37391	-0.372342	12237,12419,18000,18676,20877,51810,66311,72057,72124,229841	Bub3,Cbx5,Septin2,Phf2,Aurkb,Hnrnpu,Cenpw,Phf10,Seh1l,Cenpe	10/166
17_Member	GO Cellular Components	GO:0000779	condensed chromosome, centromeric region	-2.18086	-0.258636	12237,12419,18000,18676,20877,51810,66311,72057,72124,229841	Bub3,Cbx5,Septin2,Phf2,Aurkb,Hnrnpu,Cenpw,Phf10,Seh1l,Cenpe	10/177
17_Member	GO Biological Processes	GO:0051988	regulation of attachment of spindle microtubules to kinetochore	-2.02171	-0.170181	20877,51810,229841	Aurkb,Hnrnpu,Cenpe	3/20
18_Summary	GO Cellular Components	GO:0098862	cluster of actin-based cell projections	-4.14071	-1.31629	12305,12780,17919,18810,19730,21844,69178,74769,171429,192140,223864,238021,240411,252974,667663	Ddr1,Abcc2,Myo5b,Plec,Ralgds,Tiam1,Snx5,Pik3cb,Slc26a6,Tmc2,Rapgef3,Fscn2,Loxhd1,Tspear,Myo3a	15/-
18_Member	GO Cellular Components	GO:0098862	cluster of actin-based cell projections	-4.14071	-1.31629	12305,12780,17919,18810,19730,21844,69178,74769,171429,192140,223864,238021,240411,252974,667663	Ddr1,Abcc2,Myo5b,Plec,Ralgds,Tiam1,Snx5,Pik3cb,Slc26a6,Tmc2,Rapgef3,Fscn2,Loxhd1,Tspear,Myo3a	15/208
18_Member	GO Cellular Components	GO:0005903	brush border	-2.23233	-0.285391	12305,12780,17919,18810,19730,69178,74769,171429,223864	Ddr1,Abcc2,Myo5b,Plec,Ralgds,Snx5,Pik3cb,Slc26a6,Rapgef3	9/147
19_Summary	GO Cellular Components	GO:0032839	dendrite cytoplasm	-4.09812	-1.29023	17756,26413,51810,66725,71514,108100,16570,12702,13645,232906	Map2,Mapk1,Hnrnpu,Lrrk2,Sfpq,Baiap2,Kif3c,Socs3,Egf,Arhgap35	10/-
19_Member	GO Cellular Components	GO:0032839	dendrite cytoplasm	-4.09812	-1.29023	17756,26413,51810,66725,71514,108100	Map2,Mapk1,Hnrnpu,Lrrk2,Sfpq,Baiap2	6/33
19_Member	GO Cellular Components	GO:0120111	neuron projection cytoplasm	-3.93772	-1.23249	16570,17756,26413,51810,66725,71514,108100	Kif3c,Map2,Mapk1,Hnrnpu,Lrrk2,Sfpq,Baiap2	7/50
19_Member	Reactome Gene Sets	R-MMU-8848021	Signaling by PTK6	-2.41381	-0.389817	12702,13645,66725,71514,232906	Socs3,Egf,Lrrk2,Sfpq,Arhgap35	5/47
19_Member	Reactome Gene Sets	R-MMU-9006927	Signaling by Non-Receptor Tyrosine Kinases	-2.41381	-0.389817	12702,13645,66725,71514,232906	Socs3,Egf,Lrrk2,Sfpq,Arhgap35	5/47
20_Summary	GO Biological Processes	GO:1901097	negative regulation of autophagosome maturation	-3.97037	-1.23931	74374,94232,100502698,12952,17918,18786,29869,66530,66725,67490,74769,94221,211978,329015,545030,672511	Clec16a,Ubqln4,Rubcn,Cry1,Myo5a,Plaa,Ulk2,Ubxn6,Lrrk2,Ufl1,Pik3cb,Gopc,Zfyve26,Atg2a,Wdfy4,Rnf213	16/-
20_Member	GO Biological Processes	GO:1901097	negative regulation of autophagosome maturation	-3.97037	-1.23931	74374,94232,100502698	Clec16a,Ubqln4,Rubcn	3/5
20_Member	GO Biological Processes	GO:0006914	autophagy	-3.01201	-0.698071	12952,17918,18786,29869,66530,66725,67490,74374,74769,94221,94232,211978,329015,545030,672511,100502698	Cry1,Myo5a,Plaa,Ulk2,Ubxn6,Lrrk2,Ufl1,Clec16a,Pik3cb,Gopc,Ubqln4,Zfyve26,Atg2a,Wdfy4,Rnf213,Rubcn	16/293
20_Member	GO Biological Processes	GO:0061919	process utilizing autophagic mechanism	-3.01201	-0.698071	12952,17918,18786,29869,66530,66725,67490,74374,74769,94221,94232,211978,329015,545030,672511,100502698	Cry1,Myo5a,Plaa,Ulk2,Ubxn6,Lrrk2,Ufl1,Clec16a,Pik3cb,Gopc,Ubqln4,Zfyve26,Atg2a,Wdfy4,Rnf213,Rubcn	16/293
20_Member	GO Biological Processes	GO:0016242	negative regulation of macroautophagy	-2.37171	-0.372342	66725,74374,94232,100502698	Lrrk2,Clec16a,Ubqln4,Rubcn	4/30
20_Member	GO Biological Processes	GO:1901096	regulation of autophagosome maturation	-2.1526	-0.249155	74374,94232,100502698	Clec16a,Ubqln4,Rubcn	3/18

## Sheet: Down-metascape
GroupID	Category	Term	Description	LogP	Log(q-value)	Genes	Symbols	InTerm_InList
1_Summary	GO Cellular Components	GO:0030018	Z disc	-5.05784	-0.949139	12154,13405,17931,18810,20190,20191,20193,22138,140781,320129,64009,225288,18015,20482,63958,94245,109620,193385,15260,214384,226101,18766,26372,215210,228139,20779,226751,12295,16773,56412,74203,226562,228859,231123,382010,269593,17918	Bmp10,Dmd,Ppp1r12a,Plec,Ryr1,Ryr2,S100a1,Ttn,Myh7,Grk3,Syne1,Fhod3,Nf1,Skil,Ube4b,Dtnbp1,Dsp,Ripor2,Hira,Myocd,Myof,Pkdrej,Clcn6,Tmem120a,P2rx3,Src,Cdc42bpa,Cacnb1,Lama2,Noa1,Eif4enif1,Prrc2c,Fitm2,Haus3,Cep44,Luzp1,Myo5a	37/-
1_Member	GO Cellular Components	GO:0030018	Z disc	-5.05784	-0.949139	12154,13405,17931,18810,20190,20191,20193,22138,140781,320129	Bmp10,Dmd,Ppp1r12a,Plec,Ryr1,Ryr2,S100a1,Ttn,Myh7,Grk3	10/131
1_Member	GO Cellular Components	GO:0030017	sarcomere	-4.87565	-0.949139	12154,13405,17931,18810,20190,20191,20193,22138,64009,140781,225288,320129	Bmp10,Dmd,Ppp1r12a,Plec,Ryr1,Ryr2,S100a1,Ttn,Syne1,Myh7,Fhod3,Grk3	12/200
1_Member	GO Cellular Components	GO:0031674	I band	-4.67112	-0.869541	12154,13405,17931,18810,20190,20191,20193,22138,140781,320129	Bmp10,Dmd,Ppp1r12a,Plec,Ryr1,Ryr2,S100a1,Ttn,Myh7,Grk3	10/145
1_Member	GO Cellular Components	GO:0030016	myofibril	-4.37018	-0.665513	12154,13405,17931,18810,20190,20191,20193,22138,64009,140781,225288,320129	Bmp10,Dmd,Ppp1r12a,Plec,Ryr1,Ryr2,S100a1,Ttn,Syne1,Myh7,Fhod3,Grk3	12/225
1_Member	GO Cellular Components	GO:0043292	contractile fiber	-4.13512	-0.509633	12154,13405,17931,18810,20190,20191,20193,22138,64009,140781,225288,320129	Bmp10,Dmd,Ppp1r12a,Plec,Ryr1,Ryr2,S100a1,Ttn,Syne1,Myh7,Fhod3,Grk3	12/238
1_Member	GO Biological Processes	GO:0045214	sarcomere organization	-3.78215	-0.314696	12154,18810,22138,140781,225288	Bmp10,Plec,Ttn,Myh7,Fhod3	5/40
1_Member	GO Biological Processes	GO:0055002	striated muscle cell development	-3.65696	-0.314696	12154,13405,18810,22138,140781,225288	Bmp10,Dmd,Plec,Ttn,Myh7,Fhod3	6/66
1_Member	GO Biological Processes	GO:0007517	muscle organ development	-3.56444	-0.314696	12154,13405,18015,18810,20190,20191,20482,22138,63958,94245,109620,140781,193385	Bmp10,Dmd,Nf1,Plec,Ryr1,Ryr2,Skil,Ttn,Ube4b,Dtnbp1,Dsp,Myh7,Ripor2	13/315
1_Member	GO Biological Processes	GO:0061061	muscle structure development	-3.47468	-0.314696	12154,13405,15260,18015,18810,20190,20191,20482,22138,63958,64009,94245,109620,140781,193385,214384,225288,226101	Bmp10,Dmd,Hira,Nf1,Plec,Ryr1,Ryr2,Skil,Ttn,Ube4b,Syne1,Dtnbp1,Dsp,Myh7,Ripor2,Myocd,Fhod3,Myof	18/548
1_Member	GO Biological Processes	GO:0055008	cardiac muscle tissue morphogenesis	-3.4173	-0.314696	12154,20191,22138,63958,109620,140781	Bmp10,Ryr2,Ttn,Ube4b,Dsp,Myh7	6/73
1_Member	GO Biological Processes	GO:0055010	ventricular cardiac muscle tissue morphogenesis	-3.09203	-0.125475	12154,20191,63958,109620,140781	Bmp10,Ryr2,Ube4b,Dsp,Myh7	5/56
1_Member	GO Biological Processes	GO:0009612	response to mechanical stimulus	-3.07516	-0.125475	13405,18766,18810,20191,22138,26372,193385,215210,228139	Dmd,Pkdrej,Plec,Ryr2,Ttn,Clcn6,Ripor2,Tmem120a,P2rx3	9/188
1_Member	GO Biological Processes	GO:0031032	actomyosin structure organization	-3.05905	-0.125475	12154,18810,20779,22138,140781,225288,226751	Bmp10,Plec,Src,Ttn,Myh7,Fhod3,Cdc42bpa	7/117
1_Member	GO Biological Processes	GO:0060415	muscle tissue morphogenesis	-3.01093	-0.125475	12154,20191,22138,63958,109620,140781	Bmp10,Ryr2,Ttn,Ube4b,Dsp,Myh7	6/87
1_Member	GO Biological Processes	GO:0055001	muscle cell development	-3.0106	-0.125475	12154,13405,18810,20190,22138,140781,214384,225288,226101	Bmp10,Dmd,Plec,Ryr1,Ttn,Myh7,Myocd,Fhod3,Myof	9/192
1_Member	GO Biological Processes	GO:0007512	adult heart development	-2.96458	-0.117246	12154,22138,140781	Bmp10,Ttn,Myh7	3/16
1_Member	KEGG Pathway	mmu05410	Hypertrophic cardiomyopathy - Mus musculus (house mouse)	-2.90914	-0.0737076	12295,13405,16773,20191,22138,140781	Cacnb1,Dmd,Lama2,Ryr2,Ttn,Myh7	6/91
1_Member	GO Cellular Components	GO:0031672	A band	-2.87463	-0.0730505	17931,20191,20193,22138	Ppp1r12a,Ryr2,S100a1,Ttn	4/37
1_Member	GO Biological Processes	GO:0030239	myofibril assembly	-2.85931	-0.0684607	12154,18810,22138,140781,225288	Bmp10,Plec,Ttn,Myh7,Fhod3	5/63
1_Member	KEGG Pathway	mmu05414	Dilated cardiomyopathy - Mus musculus (house mouse)	-2.83631	-0.055929	12295,13405,16773,20191,22138,140781	Cacnb1,Dmd,Lama2,Ryr2,Ttn,Myh7	6/94
1_Member	GO Biological Processes	GO:0048644	muscle organ morphogenesis	-2.81267	-0.042503	12154,20191,22138,63958,109620,140781	Bmp10,Ryr2,Ttn,Ube4b,Dsp,Myh7	6/95
1_Member	GO Biological Processes	GO:0006937	regulation of muscle contraction	-2.77617	-0.0261325	12154,12295,13405,20190,20191,109620,140781,214384	Bmp10,Cacnb1,Dmd,Ryr1,Ryr2,Dsp,Myh7,Myocd	8/168
1_Member	GO Biological Processes	GO:0003229	ventricular cardiac muscle tissue development	-2.76875	-0.0261325	12154,20191,63958,109620,140781	Bmp10,Ryr2,Ube4b,Dsp,Myh7	5/66
1_Member	GO Biological Processes	GO:0060537	muscle tissue development	-2.74063	-0.0261325	12154,13405,18015,18810,20190,20191,20482,22138,63958,109620,140781,214384,225288	Bmp10,Dmd,Nf1,Plec,Ryr1,Ryr2,Skil,Ttn,Ube4b,Dsp,Myh7,Myocd,Fhod3	13/387
1_Member	GO Biological Processes	GO:0003300	cardiac muscle hypertrophy	-2.70669	-0.0261325	20191,22138,140781,214384	Ryr2,Ttn,Myh7,Myocd	4/41
1_Member	GO Biological Processes	GO:0048738	cardiac muscle tissue development	-2.68508	-0.0261325	12154,18810,20191,22138,63958,109620,140781,214384,225288	Bmp10,Plec,Ryr2,Ttn,Ube4b,Dsp,Myh7,Myocd,Fhod3	9/214
1_Member	GO Biological Processes	GO:0014897	striated muscle hypertrophy	-2.62967	-0.0261325	20191,22138,140781,214384	Ryr2,Ttn,Myh7,Myocd	4/43
1_Member	GO Molecular Functions	GO:0008307	structural constituent of muscle	-2.60984	-0.0261325	13405,18810,22138	Dmd,Plec,Ttn	3/21
1_Member	GO Biological Processes	GO:0035994	response to muscle stretch	-2.60984	-0.0261325	13405,20191,22138	Dmd,Ryr2,Ttn	3/21
1_Member	GO Biological Processes	GO:0014706	striated muscle tissue development	-2.60412	-0.0261325	12154,18810,20191,22138,63958,109620,140781,214384,225288	Bmp10,Plec,Ryr2,Ttn,Ube4b,Dsp,Myh7,Myocd,Fhod3	9/220
1_Member	GO Biological Processes	GO:0014896	muscle hypertrophy	-2.55668	-0.0192577	20191,22138,140781,214384	Ryr2,Ttn,Myh7,Myocd	4/45
1_Member	GO Biological Processes	GO:0055013	cardiac muscle cell development	-2.47449	-0.0192577	12154,18810,22138,214384,225288	Bmp10,Plec,Ttn,Myocd,Fhod3	5/77
1_Member	KEGG Pathway	mmu05412	Arrhythmogenic right ventricular cardiomyopathy - Mus musculus (house mouse)	-2.47449	-0.0192577	12295,13405,16773,20191,109620	Cacnb1,Dmd,Lama2,Ryr2,Dsp	5/77
1_Member	GO Biological Processes	GO:0042692	muscle cell differentiation	-2.44297	-0.0108834	12154,13405,15260,18810,20190,22138,64009,140781,214384,225288,226101	Bmp10,Dmd,Hira,Plec,Ryr1,Ttn,Syne1,Myh7,Myocd,Fhod3,Myof	11/323
1_Member	GO Biological Processes	GO:0140694	non-membrane-bounded organelle assembly	-2.44297	-0.0108834	12154,18810,22138,56412,74203,140781,225288,226562,228859,231123,382010	Bmp10,Plec,Ttn,Noa1,Eif4enif1,Myh7,Fhod3,Prrc2c,Fitm2,Haus3,Cep44	11/323
1_Member	GO Biological Processes	GO:0003231	cardiac ventricle development	-2.39586	0	12154,20191,63958,109620,140781,214384,269593	Bmp10,Ryr2,Ube4b,Dsp,Myh7,Myocd,Luzp1	7/153
1_Member	GO Biological Processes	GO:0003208	cardiac ventricle morphogenesis	-2.3571	0	12154,20191,63958,109620,140781	Bmp10,Ryr2,Ube4b,Dsp,Myh7	5/82
1_Member	GO Biological Processes	GO:0055006	cardiac cell development	-2.26933	0	12154,18810,22138,214384,225288	Bmp10,Plec,Ttn,Myocd,Fhod3	5/86
1_Member	GO Biological Processes	GO:0006942	regulation of striated muscle contraction	-2.24818	0	12154,13405,20191,109620,140781	Bmp10,Dmd,Ryr2,Dsp,Myh7	5/87
1_Member	GO Biological Processes	GO:0090257	regulation of muscle system process	-2.12333	0	12154,12295,13405,20190,20191,22138,109620,140781,214384	Bmp10,Cacnb1,Dmd,Ryr1,Ryr2,Ttn,Dsp,Myh7,Myocd	9/261
1_Member	GO Biological Processes	GO:1901019	regulation of calcium ion transmembrane transporter activity	-2.052	0	12295,13405,17918,20191,20193	Cacnb1,Dmd,Myo5a,Ryr2,S100a1	5/97
2_Summary	GO Cellular Components	GO:0042383	sarcolemma	-4.9181	-0.949139	12295,13405,13982,16773,18754,18810,20190,20191,52331,94245,110876,20193	Cacnb1,Dmd,Esr1,Lama2,Prkce,Plec,Ryr1,Ryr2,Stbd1,Dtnbp1,Scn2a,S100a1	12/-
2_Member	GO Cellular Components	GO:0042383	sarcolemma	-4.9181	-0.949139	12295,13405,13982,16773,18754,18810,20190,20191,52331,94245,110876	Cacnb1,Dmd,Esr1,Lama2,Prkce,Plec,Ryr1,Ryr2,Stbd1,Dtnbp1,Scn2a	11/166
2_Member	GO Cellular Components	GO:0030315	T-tubule	-3.51654	-0.314696	12295,13982,18754,20190,52331,110876	Cacnb1,Esr1,Prkce,Ryr1,Stbd1,Scn2a	6/70
2_Member	GO Cellular Components	GO:0016528	sarcoplasm	-2.69887	-0.0261325	12295,18810,20190,20191,20193,94245	Cacnb1,Plec,Ryr1,Ryr2,S100a1,Dtnbp1	6/100
3_Summary	GO Biological Processes	GO:0097435	supramolecular fiber organization	-3.79718	-0.314696	11854,12154,17918,18015,18810,20779,22138,23789,67886,68732,75991,78785,78885,109620,140781,216725,225288,241112,320923,13405,14468,16351,18754,64009,70292,80743,244281,270163,14252,17931,70598,226751,14027,51944,74764,78177,80986,231123,244667,94245,20191	Rhod,Bmp10,Myo5a,Nf1,Plec,Src,Ttn,Coro1b,Camsap2,Carmil1,Slain2,Clip4,Coro7,Dsp,Myh7,Adamts2,Fhod3,Catip,Map7d3,Dmd,Gbp2b,Ipp,Prkce,Syne1,Afap1,Vps16,Myo16,Myo9a,Flot2,Ppp1r12a,Filip1,Cdc42bpa,Evpl,Knstrn,Klc4,Ninl,Ckap2,Haus3,Disc1,Dtnbp1,Ryr2	41/-
3_Member	GO Biological Processes	GO:0097435	supramolecular fiber organization	-3.79718	-0.314696	11854,12154,17918,18015,18810,20779,22138,23789,67886,68732,75991,78785,78885,109620,140781,216725,225288,241112,320923	Rhod,Bmp10,Myo5a,Nf1,Plec,Src,Ttn,Coro1b,Camsap2,Carmil1,Slain2,Clip4,Coro7,Dsp,Myh7,Adamts2,Fhod3,Catip,Map7d3	19/562
3_Member	GO Molecular Functions	GO:0003779	actin binding	-3.54185	-0.314696	13405,14468,16351,17918,18754,18810,22138,23789,64009,70292,78885,80743,140781,225288,244281,270163	Dmd,Gbp2b,Ipp,Myo5a,Prkce,Plec,Ttn,Coro1b,Syne1,Afap1,Coro7,Vps16,Myh7,Fhod3,Myo16,Myo9a	16/448
3_Member	GO Cellular Components	GO:0015629	actin cytoskeleton	-3.43198	-0.314696	14252,14468,17918,17931,20779,22138,23789,68732,70292,70598,80743,140781,225288,226751,241112,244281,270163	Flot2,Gbp2b,Myo5a,Ppp1r12a,Src,Ttn,Coro1b,Carmil1,Afap1,Filip1,Vps16,Myh7,Fhod3,Cdc42bpa,Catip,Myo16,Myo9a	17/505
3_Member	GO Molecular Functions	GO:0051015	actin filament binding	-3.19823	-0.146578	17918,18810,22138,23789,64009,80743,140781,225288,244281,270163	Myo5a,Plec,Ttn,Coro1b,Syne1,Vps16,Myh7,Fhod3,Myo16,Myo9a	10/219
3_Member	GO Cellular Components	GO:0016459	myosin complex	-3.09203	-0.125475	17918,22138,140781,244281,270163	Myo5a,Ttn,Myh7,Myo16,Myo9a	5/56
3_Member	GO Cellular Components	GO:0099513	polymeric cytoskeletal fiber	-2.60739	-0.0261325	13405,14027,17918,18810,20779,23789,51944,67886,68732,70292,74764,75991,78177,78785,80743,80986,109620,231123,244667	Dmd,Evpl,Myo5a,Plec,Src,Coro1b,Knstrn,Camsap2,Carmil1,Afap1,Klc4,Slain2,Ninl,Clip4,Vps16,Ckap2,Dsp,Haus3,Disc1	19/707
3_Member	GO Biological Processes	GO:0030036	actin cytoskeleton organization	-2.42664	-0.0108834	11854,12154,17918,18015,18810,20779,22138,23789,68732,78885,94245,140781,225288,226751,241112	Rhod,Bmp10,Myo5a,Nf1,Plec,Src,Ttn,Coro1b,Carmil1,Coro7,Dtnbp1,Myh7,Fhod3,Cdc42bpa,Catip	15/522
3_Member	GO Biological Processes	GO:0030029	actin filament-based process	-2.41888	-0.0108834	11854,12154,17918,18015,18810,20191,20779,22138,23789,68732,78885,94245,140781,225288,226751,241112	Rhod,Bmp10,Myo5a,Nf1,Plec,Ryr2,Src,Ttn,Coro1b,Carmil1,Coro7,Dtnbp1,Myh7,Fhod3,Cdc42bpa,Catip	16/575
3_Member	GO Biological Processes	GO:0007015	actin filament organization	-2.16532	0	11854,17918,18810,20779,22138,23789,68732,78885,241112	Rhod,Myo5a,Plec,Src,Ttn,Coro1b,Carmil1,Coro7,Catip	9/257
3_Member	GO Cellular Components	GO:0005884	actin filament	-2.1396	0	17918,20779,23789,68732,70292,80743	Myo5a,Src,Coro1b,Carmil1,Afap1,Vps16	6/130
4_Summary	WikiPathways	WP488	Alpha 6 beta 4 integrin signaling pathway	-3.65696	-0.314696	16773,16774,18753,18810,20779,109620,11854	Lama2,Lama3,Prkcd,Plec,Src,Dsp,Rhod	7/-
4_Member	WikiPathways	WP488	Alpha 6 beta 4 integrin signaling pathway	-3.65696	-0.314696	16773,16774,18753,18810,20779,109620	Lama2,Lama3,Prkcd,Plec,Src,Dsp	6/66
4_Member	GO Biological Processes	GO:0007044	cell-substrate junction assembly	-2.66765	-0.0261325	11854,16774,18810,20779	Rhod,Lama3,Plec,Src	4/42
4_Member	GO Biological Processes	GO:0150115	cell-substrate junction organization	-2.59269	-0.0261325	11854,16774,18810,20779	Rhod,Lama3,Plec,Src	4/44
5_Summary	GO Molecular Functions	GO:0005516	calmodulin binding	-3.61344	-0.314696	13982,17918,20190,20191,22138,67886,110876,140781,208898,382018,14827	Esr1,Myo5a,Ryr1,Ryr2,Ttn,Camsap2,Scn2a,Myh7,Unc13c,Unc13a,Pdia3	11/-
5_Member	GO Molecular Functions	GO:0005516	calmodulin binding	-3.61344	-0.314696	13982,17918,20190,20191,22138,67886,110876,140781,208898,382018	Esr1,Myo5a,Ryr1,Ryr2,Ttn,Camsap2,Scn2a,Myh7,Unc13c,Unc13a	10/194
5_Member	GO Cellular Components	GO:0005790	smooth endoplasmic reticulum	-2.87463	-0.0730505	14827,17918,20190,20191	Pdia3,Myo5a,Ryr1,Ryr2	4/37
6_Summary	GO Molecular Functions	GO:0019992	diacylglycerol binding	-3.60839	-0.314696	208898,228859,382018,111173,17918,12295,55983,14468,67886	Unc13c,Fitm2,Unc13a,Erc1,Myo5a,Cacnb1,Pdzrn3,Gbp2b,Camsap2	9/-
6_Member	GO Molecular Functions	GO:0019992	diacylglycerol binding	-3.60839	-0.314696	208898,228859,382018	Unc13c,Fitm2,Unc13a	3/10
6_Member	GO Biological Processes	GO:0016082	synaptic vesicle priming	-2.60984	-0.0261325	111173,208898,382018	Erc1,Unc13c,Unc13a	3/21
6_Member	GO Cellular Components	GO:0098831	presynaptic active zone cytoplasmic component	-2.55035	-0.0192577	111173,208898,382018	Erc1,Unc13c,Unc13a	3/22
6_Member	GO Molecular Functions	GO:0017075	syntaxin-1 binding	-2.49382	-0.0192577	17918,208898,382018	Myo5a,Unc13c,Unc13a	3/23
6_Member	GO Biological Processes	GO:0007528	neuromuscular junction development	-2.42142	-0.0108834	12295,55983,208898,382018	Cacnb1,Pdzrn3,Unc13c,Unc13a	4/49
6_Member	GO Molecular Functions	GO:0030507	spectrin binding	-2.01078	0	14468,67886,382018	Gbp2b,Camsap2,Unc13a	3/34
7_Summary	GO Biological Processes	GO:0060065	uterus development	-3.47097	-0.314696	13982,20779,192195,214384,12402,14252,109254,226101	Esr1,Src,Ash1l,Myocd,Cbl,Flot2,Adtrp,Myof	8/-
7_Member	GO Biological Processes	GO:0060065	uterus development	-3.47097	-0.314696	13982,20779,192195,214384	Esr1,Src,Ash1l,Myocd	4/26
7_Member	GO Biological Processes	GO:0010640	regulation of platelet-derived growth factor receptor signaling pathway	-2.44	-0.0108834	12402,20779,214384	Cbl,Src,Myocd	3/24
7_Member	GO Cellular Components	GO:0005901	caveola	-2.052	0	12402,14252,20779,109254,226101	Cbl,Flot2,Src,Adtrp,Myof	5/97
8_Summary	GO Biological Processes	GO:0000226	microtubule cytoskeleton organization	-3.42779	-0.314696	17931,51944,66977,67886,70661,75991,78177,78785,226751,231123,244653,244667,245877,320277,320923,382010,544696,100048534,52184,58186,71492,75695,80986,111173,233765,269593,320162	Ppp1r12a,Knstrn,Nuf2,Camsap2,Sik3,Slain2,Ninl,Clip4,Cdc42bpa,Haus3,Hydin,Disc1,Map7d1,Spef2,Map7d3,Cep44,Tbc1d32,Cfap43,Odf2l,Rad18,Bbs7,Rilpl1,Ckap2,Erc1,Plekha7,Luzp1,Cep95	27/-
8_Member	GO Biological Processes	GO:0000226	microtubule cytoskeleton organization	-3.42779	-0.314696	17931,51944,66977,67886,70661,75991,78177,78785,226751,231123,244653,244667,245877,320277,320923,382010,544696,100048534	Ppp1r12a,Knstrn,Nuf2,Camsap2,Sik3,Slain2,Ninl,Clip4,Cdc42bpa,Haus3,Hydin,Disc1,Map7d1,Spef2,Map7d3,Cep44,Tbc1d32,Cfap43	18/553
8_Member	GO Cellular Components	GO:0005813	centrosome	-2.232	0	17931,51944,52184,58186,67886,71492,75695,75991,78177,80986,111173,231123,233765,244667,269593,320162,382010	Ppp1r12a,Knstrn,Odf2l,Rad18,Camsap2,Bbs7,Rilpl1,Slain2,Ninl,Ckap2,Erc1,Haus3,Plekha7,Disc1,Luzp1,Cep95,Cep44	17/656
9_Summary	GO Biological Processes	GO:0034330	cell junction organization	-3.36323	-0.281818	11854,12295,13497,15550,16774,17918,18810,20779,55983,64817,70598,109620,111173,208898,233765,244682,270163,382018,12402,13405,13982,18015,18952,80743,94245,110876,216238,228139,231876,244667,320129,18754,57267,108800,14252,68966	Rhod,Cacnb1,Drp2,Htr1a,Lama3,Myo5a,Plec,Src,Pdzrn3,Svep1,Filip1,Dsp,Erc1,Unc13c,Plekha7,Cntn5,Myo9a,Unc13a,Cbl,Dmd,Esr1,Nf1,Septin4,Vps16,Dtnbp1,Scn2a,Eea1,P2rx3,Lmtk2,Disc1,Grk3,Prkce,Apba3,Ston2,Flot2,Ngdn	36/-
9_Member	GO Biological Processes	GO:0034330	cell junction organization	-3.36323	-0.281818	11854,12295,13497,15550,16774,17918,18810,20779,55983,64817,70598,109620,111173,208898,233765,244682,270163,382018	Rhod,Cacnb1,Drp2,Htr1a,Lama3,Myo5a,Plec,Src,Pdzrn3,Svep1,Filip1,Dsp,Erc1,Unc13c,Plekha7,Cntn5,Myo9a,Unc13a	18/560
9_Member	GO Cellular Components	GO:0030424	axon	-3.01995	-0.125475	12402,13405,13982,15550,17918,18015,18810,18952,20779,80743,94245,110876,208898,216238,228139,231876,244667,244682,270163,320129,382018	Cbl,Dmd,Esr1,Htr1a,Myo5a,Nf1,Plec,Septin4,Src,Vps16,Dtnbp1,Scn2a,Unc13c,Eea1,P2rx3,Lmtk2,Disc1,Cntn5,Myo9a,Grk3,Unc13a	21/754
9_Member	GO Biological Processes	GO:0099536	synaptic signaling	-2.72856	-0.0261325	12295,13405,13497,15550,17918,18015,18754,57267,108800,111173,208898,216238,228139,382018	Cacnb1,Dmd,Drp2,Htr1a,Myo5a,Nf1,Prkce,Apba3,Ston2,Erc1,Unc13c,Eea1,P2rx3,Unc13a	14/436
9_Member	GO Biological Processes	GO:0007268	chemical synaptic transmission	-2.50388	-0.0192577	12295,15550,17918,18015,18754,57267,108800,111173,208898,216238,228139,382018	Cacnb1,Htr1a,Myo5a,Nf1,Prkce,Apba3,Ston2,Erc1,Unc13c,Eea1,P2rx3,Unc13a	12/364
9_Member	GO Biological Processes	GO:0098916	anterograde trans-synaptic signaling	-2.50388	-0.0192577	12295,15550,17918,18015,18754,57267,108800,111173,208898,216238,228139,382018	Cacnb1,Htr1a,Myo5a,Nf1,Prkce,Apba3,Ston2,Erc1,Unc13c,Eea1,P2rx3,Unc13a	12/364
9_Member	GO Cellular Components	GO:0098793	presynapse	-2.50097	-0.0192577	12295,13405,13982,14252,15550,17918,18754,18952,80743,94245,108800,110876,111173,208898,228139,244667,244682,320129,382018	Cacnb1,Dmd,Esr1,Flot2,Htr1a,Myo5a,Prkce,Septin4,Vps16,Dtnbp1,Ston2,Scn2a,Erc1,Unc13c,P2rx3,Disc1,Cntn5,Grk3,Unc13a	19/723
9_Member	GO Biological Processes	GO:0099537	trans-synaptic signaling	-2.32859	0	12295,15550,17918,18015,18754,57267,108800,111173,208898,216238,228139,382018	Cacnb1,Htr1a,Myo5a,Nf1,Prkce,Apba3,Ston2,Erc1,Unc13c,Eea1,P2rx3,Unc13a	12/383
9_Member	GO Biological Processes	GO:0050808	synapse organization	-2.23141	0	12295,13497,15550,17918,55983,70598,111173,208898,244682,270163,382018	Cacnb1,Drp2,Htr1a,Myo5a,Pdzrn3,Filip1,Erc1,Unc13c,Cntn5,Myo9a,Unc13a	11/345
9_Member	GO Cellular Components	GO:0098978	glutamatergic synapse	-2.21927	0	12295,13497,14252,17918,18015,18754,20779,68966,70598,94245,110876,111173,216238,244667,270163,320129,382018	Cacnb1,Drp2,Flot2,Myo5a,Nf1,Prkce,Src,Ngdn,Filip1,Dtnbp1,Scn2a,Erc1,Eea1,Disc1,Myo9a,Grk3,Unc13a	17/658
9_Member	GO Cellular Components	GO:0008021	synaptic vesicle	-2.17597	0	13405,17918,18952,94245,108800,111173,208898,244667,382018	Dmd,Myo5a,Septin4,Dtnbp1,Ston2,Erc1,Unc13c,Disc1,Unc13a	9/256
9_Member	GO Cellular Components	GO:0070382	exocytic vesicle	-2.00284	0	13405,17918,18952,94245,108800,111173,208898,244667,382018	Dmd,Myo5a,Septin4,Dtnbp1,Ston2,Erc1,Unc13c,Disc1,Unc13a	9/273
10_Summary	GO Biological Processes	GO:0051053	negative regulation of DNA metabolic process	-3.18849	-0.146578	13134,17688,20779,21951,51869,58186,74355,227737,21745,386612,545913	Dach1,Msh6,Src,Tnks,Rif1,Rad18,Smchd1,Niban2,Tep1,Thoc6,Zscan4d	11/-
10_Member	GO Biological Processes	GO:0051053	negative regulation of DNA metabolic process	-3.18849	-0.146578	13134,17688,20779,21951,51869,58186,74355,227737	Dach1,Msh6,Src,Tnks,Rif1,Rad18,Smchd1,Niban2	8/145
10_Member	GO Biological Processes	GO:0045910	negative regulation of DNA recombination	-2.35854	0	17688,51869,58186,74355	Msh6,Rif1,Rad18,Smchd1	4/51
10_Member	GO Cellular Components	GO:0000781	chromosome, telomeric region	-2.25421	0	21745,21951,51869,74355,386612,545913	Tep1,Tnks,Rif1,Smchd1,Thoc6,Zscan4d	6/123
11_Summary	CORUM	CORUM:6938	c-Src immune complex	-3.14328	-0.125475	18753,18754,20779,23789,53610,13982,16179,18718,21951,22123,66413,108723	Prkcd,Prkce,Src,Coro1b,Nono,Esr1,Irak1,Pip4k2a,Tnks,Psmd3,Psmd6,Card11	12/-
11_Member	CORUM	CORUM:6938	c-Src immune complex	-3.14328	-0.125475	18753,18754,20779	Prkcd,Prkce,Src	3/14
11_Member	GO Biological Processes	GO:0036120	cellular response to platelet-derived growth factor stimulus	-2.67261	-0.0261325	18754,20779,23789	Prkce,Src,Coro1b	3/20
11_Member	GO Biological Processes	GO:0036119	response to platelet-derived growth factor	-2.49382	-0.0192577	18754,20779,23789	Prkce,Src,Coro1b	3/23
11_Member	GO Biological Processes	GO:1904385	cellular response to angiotensin	-2.49382	-0.0192577	18753,20779,53610	Prkcd,Src,Nono	3/23
11_Member	GO Biological Processes	GO:1990776	response to angiotensin	-2.24753	0	18753,20779,53610	Prkcd,Src,Nono	3/28
11_Member	Reactome Gene Sets	R-MMU-9006925	Intracellular signaling by second messengers	-2.18668	0	13982,16179,18718,18753,18754,20779,21951,22123,66413	Esr1,Irak1,Pip4k2a,Prkcd,Prkce,Src,Tnks,Psmd3,Psmd6	9/255
11_Member	Reactome Gene Sets	R-MMU-5607764	CLEC7A (Dectin-1) signaling	-2.18648	0	18753,20779,22123,66413,108723	Prkcd,Src,Psmd3,Psmd6,Card11	5/90
12_Summary	GO Molecular Functions	GO:0008270	zinc ion binding	-3.03374	-0.125475	13405,13497,13982,21753,21951,22225,22763,27214,52463,55983,56399,57908,66190,67667,74098,78911,84505,107508,216725,382913	Dmd,Drp2,Esr1,Tes,Tnks,Usp5,Zfr,Dbf4,Tet1,Pdzrn3,Akap8,Zfp318,Acer3,Alkbh8,Czib,Trim42,Setdb1,Eprs,Adamts2,Neil2	20/-
12_Member	GO Molecular Functions	GO:0008270	zinc ion binding	-3.03374	-0.125475	13405,13497,13982,21753,21951,22225,22763,27214,52463,55983,56399,57908,66190,67667,74098,78911,84505,107508,216725,382913	Dmd,Drp2,Esr1,Tes,Tnks,Usp5,Zfr,Dbf4,Tet1,Pdzrn3,Akap8,Zfp318,Acer3,Alkbh8,Czib,Trim42,Setdb1,Eprs,Adamts2,Neil2	20/700
13_Summary	GO Molecular Functions	GO:0140640	catalytic activity, acting on a nucleic acid	-3.0175	-0.125475	17688,19366,21745,52575,67493,67667,67848,68857,70428,70603,72198,75686,77987,83703,107508,212880,223989,382913	Msh6,Rad54l,Tep1,Trmt10c,Mettl16,Alkbh8,Ddx55,Dtwd2,Polr3b,Mutyh,Mtrex,Nudt16,Ascc3,Dbr1,Eprs,Ddx46,Marf1,Neil2	18/-
13_Member	GO Molecular Functions	GO:0140640	catalytic activity, acting on a nucleic acid	-3.0175	-0.125475	17688,19366,21745,52575,67493,67667,67848,68857,70428,70603,72198,75686,77987,83703,107508,212880,223989,382913	Msh6,Rad54l,Tep1,Trmt10c,Mettl16,Alkbh8,Ddx55,Dtwd2,Polr3b,Mutyh,Mtrex,Nudt16,Ascc3,Dbr1,Eprs,Ddx46,Marf1,Neil2	18/600
13_Member	GO Molecular Functions	GO:0140098	catalytic activity, acting on RNA	-2.28468	0	52575,67493,67667,67848,68857,70428,72198,75686,83703,107508,212880,223989	Trmt10c,Mettl16,Alkbh8,Ddx55,Dtwd2,Polr3b,Mtrex,Nudt16,Dbr1,Eprs,Ddx46,Marf1	12/388
14_Summary	GO Cellular Components	GO:1990752	microtubule end	-2.9666	-0.117246	51944,67886,75991,78785	Knstrn,Camsap2,Slain2,Clip4	4/-
14_Member	GO Cellular Components	GO:1990752	microtubule end	-2.9666	-0.117246	51944,67886,75991,78785	Knstrn,Camsap2,Slain2,Clip4	4/35
14_Member	GO Cellular Components	GO:0035371	microtubule plus-end	-2.33957	0	51944,75991,78785	Knstrn,Slain2,Clip4	3/26
15_Summary	GO Biological Processes	GO:0090136	epithelial cell-cell adhesion	-2.96458	-0.117246	64817,109620,233765	Svep1,Dsp,Plekha7	3/-
15_Member	GO Biological Processes	GO:0090136	epithelial cell-cell adhesion	-2.96458	-0.117246	64817,109620,233765	Svep1,Dsp,Plekha7	3/16
16_Summary	GO Molecular Functions	GO:0070034	telomerase RNA binding	-2.88445	-0.0730505	21745,67332,229512,56031,80744	Tep1,Snrpd3,Smg5,Ppie,Cwc22	5/-
16_Member	GO Molecular Functions	GO:0070034	telomerase RNA binding	-2.88445	-0.0730505	21745,67332,229512	Tep1,Snrpd3,Smg5	3/17
16_Member	GO Cellular Components	GO:0005697	telomerase holoenzyme complex	-2.60984	-0.0261325	21745,67332,229512	Tep1,Snrpd3,Smg5	3/21
16_Member	GO Cellular Components	GO:0071007	U2-type catalytic step 2 spliceosome	-2.12261	0	56031,67332,80744	Ppie,Snrpd3,Cwc22	3/31
17_Summary	GO Biological Processes	GO:0090660	cerebrospinal fluid circulation	-2.73901	-0.0261325	71870,320277,100048534	Cfap45,Spef2,Cfap43	3/-
17_Member	GO Biological Processes	GO:0090660	cerebrospinal fluid circulation	-2.73901	-0.0261325	71870,320277,100048534	Cfap45,Spef2,Cfap43	3/19
18_Summary	GO Biological Processes	GO:0035265	organ growth	-2.69906	-0.0261325	12154,13982,16847,22138,58214,214384,239790,13405,20190,20779,70661,84505,240725	Bmp10,Esr1,Lepr,Ttn,Cst10,Myocd,Ostn,Dmd,Ryr1,Src,Sik3,Setdb1,Sulf1	13/-
18_Member	GO Biological Processes	GO:0035265	organ growth	-2.69906	-0.0261325	12154,13982,16847,22138,58214,214384,239790	Bmp10,Esr1,Lepr,Ttn,Cst10,Myocd,Ostn	7/135
18_Member	GO Biological Processes	GO:0060348	bone development	-2.59092	-0.0261325	13405,16847,20190,20779,58214,70661,84505,239790,240725	Dmd,Lepr,Ryr1,Src,Cst10,Sik3,Setdb1,Ostn,Sulf1	9/221
19_Summary	GO Cellular Components	GO:0045111	intermediate filament cytoskeleton	-2.66508	-0.0261325	13405,14027,17918,18754,18810,109620,210009,244667,20190,20191,58214,69047,76614,111173	Dmd,Evpl,Myo5a,Prkce,Plec,Dsp,Mtrr,Disc1,Ryr1,Ryr2,Cst10,Atp2c2,Immt,Erc1	14/-
19_Member	GO Cellular Components	GO:0045111	intermediate filament cytoskeleton	-2.66508	-0.0261325	13405,14027,17918,18754,18810,109620,210009,244667	Dmd,Evpl,Myo5a,Prkce,Plec,Dsp,Mtrr,Disc1	8/175
19_Member	GO Biological Processes	GO:0055074	calcium ion homeostasis	-2.20828	0	17918,18754,20190,20191,58214,69047,76614,111173,244667	Myo5a,Prkce,Ryr1,Ryr2,Cst10,Atp2c2,Immt,Erc1,Disc1	9/253
19_Member	GO Biological Processes	GO:0051560	mitochondrial calcium ion homeostasis	-2.20426	0	18754,76614,244667	Prkce,Immt,Disc1	3/29
19_Member	GO Biological Processes	GO:0006874	intracellular calcium ion homeostasis	-2.08261	0	17918,18754,20190,20191,69047,76614,111173,244667	Myo5a,Prkce,Ryr1,Ryr2,Atp2c2,Immt,Erc1,Disc1	8/219
20_Summary	GO Biological Processes	GO:0002064	epithelial cell development	-2.63077	-0.0261325	13405,13982,18810,19886,20779,75695,77929,102247,244653	Dmd,Esr1,Plec,Ros1,Src,Rilpl1,Yipf6,Gpat4,Hydin	9/-
20_Member	GO Biological Processes	GO:0002064	epithelial cell development	-2.63077	-0.0261325	13405,13982,18810,19886,20779,75695,77929,102247,244653	Dmd,Esr1,Plec,Ros1,Src,Rilpl1,Yipf6,Gpat4,Hydin	9/218
20_Member	GO Biological Processes	GO:0002066	columnar/cuboidal epithelial cell development	-2.24108	0	19886,20779,77929,102247	Ros1,Src,Yipf6,Gpat4	4/55

## Sheet: Nochange-metascape
GroupID	Category	Term	Description	LogP	Log(q-value)	Genes	Symbols	InTerm_InList
1_Summary	GO Biological Processes	GO:0016072	rRNA metabolic process	-5.18723	-1.10537	20085,21429,50912,52705,66580,67025,67223,70683,72515,73674,76130,101867,320790,103573,22321,192657,218333,229487	Rps19,Ubtf,Exosc10,Krr1,Esf1,Rpl11,Rrp15,Utp20,Wdr43,Wdr75,Las1l,Rrp8,Chd7,Xpo1,Vars,Ell2,Ice1,Gatb	18/-
1_Member	GO Biological Processes	GO:0016072	rRNA metabolic process	-5.18723	-1.10537	20085,21429,50912,52705,66580,67025,67223,70683,72515,73674,76130,101867,320790	Rps19,Ubtf,Exosc10,Krr1,Esf1,Rpl11,Rrp15,Utp20,Wdr43,Wdr75,Las1l,Rrp8,Chd7	13/237
1_Member	GO Biological Processes	GO:0006364	rRNA processing	-5.09392	-1.10537	20085,50912,52705,66580,67025,67223,70683,72515,73674,76130,101867,320790	Rps19,Exosc10,Krr1,Esf1,Rpl11,Rrp15,Utp20,Wdr43,Wdr75,Las1l,Rrp8,Chd7	12/206
1_Member	GO Cellular Components	GO:0030684	preribosome	-4.21983	-0.780134	20085,50912,52705,67223,70683,72515,73674,76130	Rps19,Exosc10,Krr1,Rrp15,Utp20,Wdr43,Wdr75,Las1l	8/111
1_Member	GO Biological Processes	GO:0042254	ribosome biogenesis	-3.98699	-0.780134	20085,50912,52705,66580,67025,67223,70683,72515,73674,76130,101867,103573,320790	Rps19,Exosc10,Krr1,Esf1,Rpl11,Rrp15,Utp20,Wdr43,Wdr75,Las1l,Rrp8,Xpo1,Chd7	13/309
1_Member	GO Biological Processes	GO:0034660	ncRNA metabolic process	-3.98539	-0.780134	20085,21429,22321,50912,52705,66580,67025,67223,70683,72515,73674,76130,101867,192657,218333,229487,320790	Rps19,Ubtf,Vars,Exosc10,Krr1,Esf1,Rpl11,Rrp15,Utp20,Wdr43,Wdr75,Las1l,Rrp8,Ell2,Ice1,Gatb,Chd7	17/491
1_Member	GO Cellular Components	GO:0032040	small-subunit processome	-3.56986	-0.508644	20085,50912,52705,70683,72515,73674	Rps19,Exosc10,Krr1,Utp20,Wdr43,Wdr75	6/74
1_Member	GO Biological Processes	GO:0042274	ribosomal small subunit biogenesis	-2.7865	-0.115263	20085,50912,52705,70683,72515,73674	Rps19,Exosc10,Krr1,Utp20,Wdr43,Wdr75	6/104
1_Member	GO Biological Processes	GO:0022613	ribonucleoprotein complex biogenesis	-2.71608	-0.103976	20085,50912,52705,66580,67025,67223,70683,72515,73674,76130,101867,103573,320790	Rps19,Exosc10,Krr1,Esf1,Rpl11,Rrp15,Utp20,Wdr43,Wdr75,Las1l,Rrp8,Xpo1,Chd7	13/422
1_Member	GO Biological Processes	GO:0034470	ncRNA processing	-2.56064	-0.0554959	20085,50912,52705,66580,67025,67223,70683,72515,73674,76130,101867,320790	Rps19,Exosc10,Krr1,Esf1,Rpl11,Rrp15,Utp20,Wdr43,Wdr75,Las1l,Rrp8,Chd7	12/388
1_Member	Reactome Gene Sets	R-MMU-6791226	Major pathway of rRNA processing in the nucleolus and cytosol	-2.27983	0	20085,50912,52705,67025,72515,73674,76130	Rps19,Exosc10,Krr1,Rpl11,Wdr43,Wdr75,Las1l	7/174
1_Member	Reactome Gene Sets	R-MMU-72312	rRNA processing	-2.27983	0	20085,50912,52705,67025,72515,73674,76130	Rps19,Exosc10,Krr1,Rpl11,Wdr43,Wdr75,Las1l	7/174
1_Member	Reactome Gene Sets	R-MMU-8868773	rRNA processing in the nucleus and cytosol	-2.27983	0	20085,50912,52705,67025,72515,73674,76130	Rps19,Exosc10,Krr1,Rpl11,Wdr43,Wdr75,Las1l	7/174
1_Member	GO Biological Processes	GO:0045943	positive regulation of transcription by RNA polymerase I	-2.10507	0	21429,72515,73674	Ubtf,Wdr43,Wdr75	3/34
1_Member	GO Biological Processes	GO:0000460	maturation of 5.8S rRNA	-2.06998	0	50912,67223,76130	Exosc10,Rrp15,Las1l	3/35
2_Summary	GO Biological Processes	GO:0006816	calcium ion transport	-5.03188	-1.10537	11419,11749,12287,12290,18803,20191,22068,22295,55991,56808,74143,216001,381812,13860,14397,60613,100986,243634,11776,20512,320106,14061,14693,16176,17295,18260,75785,108737,320790,66445	Asic1,Anxa6,Cacna1b,Cacna1e,Plcg1,Ryr2,Trpc6,Cdh23,Panx1,Cacna2d2,Opa1,Micu1,Cracr2a,Eps8,Gabra4,Kcnq4,Akap9,Ano2,Ap3d1,Slc1a3,Slc38a11,F2,Gnb2,Il1b,Met,Ocln,Klhl24,Oxsr1,Chd7,Cyc1	30/-
2_Member	GO Biological Processes	GO:0006816	calcium ion transport	-5.03188	-1.10537	11419,11749,12287,12290,18803,20191,22068,22295,55991,56808,74143,216001,381812	Asic1,Anxa6,Cacna1b,Cacna1e,Plcg1,Ryr2,Trpc6,Cdh23,Panx1,Cacna2d2,Opa1,Micu1,Cracr2a	13/245
2_Member	GO Biological Processes	GO:0070588	calcium ion transmembrane transport	-4.18352	-0.780134	11419,12287,12290,18803,20191,22068,55991,56808,74143,216001	Asic1,Cacna1b,Cacna1e,Plcg1,Ryr2,Trpc6,Panx1,Cacna2d2,Opa1,Micu1	10/179
2_Member	GO Molecular Functions	GO:0005262	calcium channel activity	-3.37714	-0.404869	11749,12287,12290,20191,22068,55991,56808	Anxa6,Cacna1b,Cacna1e,Ryr2,Trpc6,Panx1,Cacna2d2	7/112
2_Member	GO Molecular Functions	GO:0015085	calcium ion transmembrane transporter activity	-2.95291	-0.171044	11749,12287,12290,20191,22068,55991,56808	Anxa6,Cacna1b,Cacna1e,Ryr2,Trpc6,Panx1,Cacna2d2	7/132
2_Member	GO Cellular Components	GO:0034702	monoatomic ion channel complex	-2.95143	-0.171044	12287,12290,13860,14397,20191,22068,56808,60613,100986,216001,243634	Cacna1b,Cacna1e,Eps8,Gabra4,Ryr2,Trpc6,Cacna2d2,Kcnq4,Akap9,Micu1,Ano2	11/301
2_Member	GO Cellular Components	GO:0034704	calcium channel complex	-2.86293	-0.129816	12287,12290,20191,56808,216001	Cacna1b,Cacna1e,Ryr2,Cacna2d2,Micu1	5/68
2_Member	GO Biological Processes	GO:0030001	metal ion transport	-2.81289	-0.125256	11419,11749,11776,12287,12290,18803,20191,20512,22068,22295,55991,56808,60613,74143,216001,320106,381812	Asic1,Anxa6,Ap3d1,Cacna1b,Cacna1e,Plcg1,Ryr2,Slc1a3,Trpc6,Cdh23,Panx1,Cacna2d2,Kcnq4,Opa1,Micu1,Slc38a11,Cracr2a	17/623
2_Member	GO Biological Processes	GO:0034762	regulation of transmembrane transport	-2.71855	-0.103976	12287,12290,14061,14693,16176,17295,18260,18803,20191,22068,56808,60613,75785,100986,108737,320790,381812	Cacna1b,Cacna1e,F2,Gnb2,Il1b,Met,Ocln,Plcg1,Ryr2,Trpc6,Cacna2d2,Kcnq4,Klhl24,Akap9,Oxsr1,Chd7,Cracr2a	17/636
2_Member	GO Cellular Components	GO:0034703	cation channel complex	-2.60144	-0.0670355	12287,12290,20191,22068,56808,60613,100986,216001	Cacna1b,Cacna1e,Ryr2,Trpc6,Cacna2d2,Kcnq4,Akap9,Micu1	8/194
2_Member	GO Biological Processes	GO:0034765	regulation of monoatomic ion transmembrane transport	-2.56021	-0.0554959	12287,12290,14061,14693,18803,20191,22068,56808,60613,75785,100986,108737,320790,381812	Cacna1b,Cacna1e,F2,Gnb2,Plcg1,Ryr2,Trpc6,Cacna2d2,Kcnq4,Klhl24,Akap9,Oxsr1,Chd7,Cracr2a	14/493
2_Member	GO Cellular Components	GO:1902495	transmembrane transporter complex	-2.52464	-0.0452792	12287,12290,13860,14397,20191,22068,56808,60613,66445,100986,216001,243634	Cacna1b,Cacna1e,Eps8,Gabra4,Ryr2,Trpc6,Cacna2d2,Kcnq4,Cyc1,Akap9,Micu1,Ano2	12/392
2_Member	GO Biological Processes	GO:0070509	calcium ion import	-2.4858	-0.0166652	12287,12290,216001	Cacna1b,Cacna1e,Micu1	3/25
2_Member	GO Cellular Components	GO:1990351	transporter complex	-2.32798	0	12287,12290,13860,14397,20191,22068,56808,60613,66445,100986,216001,243634	Cacna1b,Cacna1e,Eps8,Gabra4,Ryr2,Trpc6,Cacna2d2,Kcnq4,Cyc1,Akap9,Micu1,Ano2	12/415
2_Member	GO Biological Processes	GO:0034220	monoatomic ion transmembrane transport	-2.22797	0	11419,11749,12287,12290,14397,18803,20191,20512,22068,55991,56808,60613,74143,216001,243634	Asic1,Anxa6,Cacna1b,Cacna1e,Gabra4,Plcg1,Ryr2,Slc1a3,Trpc6,Panx1,Cacna2d2,Kcnq4,Opa1,Micu1,Ano2	15/595
2_Member	GO Biological Processes	GO:0006812	monoatomic cation transport	-2.21427	0	11419,11749,11776,12287,12290,18803,20191,20512,22068,22295,55991,56808,60613,74143,216001,320106,381812	Asic1,Anxa6,Ap3d1,Cacna1b,Cacna1e,Plcg1,Ryr2,Slc1a3,Trpc6,Cdh23,Panx1,Cacna2d2,Kcnq4,Opa1,Micu1,Slc38a11,Cracr2a	17/714
2_Member	GO Biological Processes	GO:0098660	inorganic ion transmembrane transport	-2.03173	0	11419,12287,12290,14397,18803,20191,20512,22068,55991,56808,60613,74143,216001,243634	Asic1,Cacna1b,Cacna1e,Gabra4,Plcg1,Ryr2,Slc1a3,Trpc6,Panx1,Cacna2d2,Kcnq4,Opa1,Micu1,Ano2	14/568
3_Summary	GO Biological Processes	GO:0032611	interleukin-1 beta production	-4.47605	-0.93981	16176,55991,101613,216799	Il1b,Panx1,Nlrp6,Nlrp3	4/-
3_Member	GO Biological Processes	GO:0032611	interleukin-1 beta production	-4.47605	-0.93981	16176,55991,101613,216799	Il1b,Panx1,Nlrp6,Nlrp3	4/16
3_Member	GO Biological Processes	GO:0032612	interleukin-1 production	-4.47605	-0.93981	16176,55991,101613,216799	Il1b,Panx1,Nlrp6,Nlrp3	4/16
3_Member	GO Biological Processes	GO:0010934	macrophage cytokine production	-2.00311	0	16176,55991,216799	Il1b,Panx1,Nlrp3	3/37
4_Summary	GO Cellular Components	GO:0031514	motile cilium	-4.45368	-0.93981	14204,15510,16563,17295,100986,110084,110350,212517,214704,215772,226356,241516,327954,18595,22295,69672,73692,77048,111173,216274,217335,243634,381741,12290,12338	Il4i1,Hspd1,Kif2a,Met,Akap9,Dnah1,Dync2h1,Cfap44,Iqub,Adgb,Cfap221,Fsip2,Dnah2,Pdgfra,Cdh23,Txndc15,Cplane1,Cep83,Erc1,Cep290,Fbf1,Ano2,Lrrc43,Cacna1e,Capn6	25/-
4_Member	GO Cellular Components	GO:0031514	motile cilium	-4.45368	-0.93981	14204,15510,16563,17295,100986,110084,110350,212517,214704,215772,226356,241516,327954	Il4i1,Hspd1,Kif2a,Met,Akap9,Dnah1,Dync2h1,Cfap44,Iqub,Adgb,Cfap221,Fsip2,Dnah2	13/278
4_Member	GO Cellular Components	GO:0005929	cilium	-4.44036	-0.93981	14204,15510,16563,17295,18595,22295,69672,73692,77048,100986,110084,110350,111173,212517,214704,215772,216274,217335,226356,241516,243634,327954,381741	Il4i1,Hspd1,Kif2a,Met,Pdgfra,Cdh23,Txndc15,Cplane1,Cep83,Akap9,Dnah1,Dync2h1,Erc1,Cfap44,Iqub,Adgb,Cep290,Fbf1,Cfap221,Fsip2,Ano2,Dnah2,Lrrc43	23/743
4_Member	GO Cellular Components	GO:0097729	9+2 motile cilium	-3.78535	-0.660467	14204,15510,16563,17295,100986,110084,215772,226356,241516,327954	Il4i1,Hspd1,Kif2a,Met,Akap9,Dnah1,Adgb,Cfap221,Fsip2,Dnah2	10/200
4_Member	GO Biological Processes	GO:0060271	cilium assembly	-3.64174	-0.539138	69672,73692,77048,110084,110350,212517,214704,216274,217335,226356,241516,327954,381741	Txndc15,Cplane1,Cep83,Dnah1,Dync2h1,Cfap44,Iqub,Cep290,Fbf1,Cfap221,Fsip2,Dnah2,Lrrc43	13/335
4_Member	GO Cellular Components	GO:0036126	sperm flagellum	-3.39022	-0.404869	14204,15510,16563,17295,110084,215772,226356,241516,327954	Il4i1,Hspd1,Kif2a,Met,Dnah1,Adgb,Cfap221,Fsip2,Dnah2	9/184
4_Member	GO Biological Processes	GO:0044782	cilium organization	-3.22079	-0.292201	69672,73692,77048,110084,110350,212517,214704,216274,217335,226356,241516,327954,381741	Txndc15,Cplane1,Cep83,Dnah1,Dync2h1,Cfap44,Iqub,Cep290,Fbf1,Cfap221,Fsip2,Dnah2,Lrrc43	13/371
4_Member	GO Biological Processes	GO:0120316	sperm flagellum assembly	-2.68185	-0.0843922	110084,212517,226356,241516	Dnah1,Cfap44,Cfap221,Fsip2	4/45
4_Member	GO Biological Processes	GO:0120031	plasma membrane bounded cell projection assembly	-2.61041	-0.0670355	69672,73692,77048,110084,110350,212517,214704,216274,217335,226356,241516,327954,381741	Txndc15,Cplane1,Cep83,Dnah1,Dync2h1,Cfap44,Iqub,Cep290,Fbf1,Cfap221,Fsip2,Dnah2,Lrrc43	13/434
4_Member	GO Biological Processes	GO:0001539	cilium or flagellum-dependent cell motility	-2.55492	-0.0554959	12290,17295,110084,212517,226356,241516,327954	Cacna1e,Met,Dnah1,Cfap44,Cfap221,Fsip2,Dnah2	7/155
4_Member	GO Biological Processes	GO:0060285	cilium-dependent cell motility	-2.55492	-0.0554959	12290,17295,110084,212517,226356,241516,327954	Cacna1e,Met,Dnah1,Cfap44,Cfap221,Fsip2,Dnah2	7/155
4_Member	GO Biological Processes	GO:0030031	cell projection assembly	-2.50915	-0.0349319	69672,73692,77048,110084,110350,212517,214704,216274,217335,226356,241516,327954,381741	Txndc15,Cplane1,Cep83,Dnah1,Dync2h1,Cfap44,Iqub,Cep290,Fbf1,Cfap221,Fsip2,Dnah2,Lrrc43	13/446
4_Member	GO Cellular Components	GO:0097225	sperm midpiece	-2.28023	0	14204,15510,215772,241516	Il4i1,Hspd1,Adgb,Fsip2	4/58
4_Member	GO Biological Processes	GO:0001578	microtubule bundle formation	-2.27208	0	12338,110084,212517,241516,327954,381741	Capn6,Dnah1,Cfap44,Fsip2,Dnah2,Lrrc43	6/132
4_Member	GO Biological Processes	GO:0007288	sperm axoneme assembly	-2.21784	0	110084,212517,241516	Dnah1,Cfap44,Fsip2	3/31
4_Member	GO Biological Processes	GO:0035082	axoneme assembly	-2.1569	0	110084,212517,241516,327954,381741	Dnah1,Cfap44,Fsip2,Dnah2,Lrrc43	5/99
4_Member	GO Biological Processes	GO:0030317	flagellated sperm motility	-2.15015	0	12290,17295,110084,212517,226356,241516	Cacna1e,Met,Dnah1,Cfap44,Cfap221,Fsip2	6/140
4_Member	GO Biological Processes	GO:0060294	cilium movement involved in cell motility	-2.05069	0	12290,17295,110084,212517,226356,241516	Cacna1e,Met,Dnah1,Cfap44,Cfap221,Fsip2	6/147
4_Member	GO Biological Processes	GO:0097722	sperm motility	-2.05069	0	12290,17295,110084,212517,226356,241516	Cacna1e,Met,Dnah1,Cfap44,Cfap221,Fsip2	6/147
5_Summary	GO Biological Processes	GO:0046928	regulation of neurotransmitter secretion	-4.45277	-0.93981	11419,12287,12290,12889,14823,56216,78771,216963,16176,17295,18196,18803,20512,56808,60613,100986,111173,214162,223435,243764,11772,71732,14397,11519,11776,13860,243634,245446,442801,14962,18805,19246,20239,76338,93742	Asic1,Cacna1b,Cacna1e,Cplx1,Grm8,Stx1b,Mctp1,Git1,Il1b,Met,Nsg1,Plcg1,Slc1a3,Cacna2d2,Kcnq4,Akap9,Erc1,Kmt2a,Trio,Chrm2,Ap2a2,Vps11,Gabra4,Add2,Ap3d1,Eps8,Ano2,Slitrk4,Arhgef15,Cfb,Pld1,Ptpn1,Atxn2,Rab2b,Pard3	35/-
5_Member	GO Biological Processes	GO:0046928	regulation of neurotransmitter secretion	-4.45277	-0.93981	11419,12287,12290,12889,14823,56216,78771,216963	Asic1,Cacna1b,Cacna1e,Cplx1,Grm8,Stx1b,Mctp1,Git1	8/103
5_Member	GO Biological Processes	GO:0051588	regulation of neurotransmitter transport	-3.90575	-0.732562	11419,12287,12290,12889,14823,56216,78771,216963	Asic1,Cacna1b,Cacna1e,Cplx1,Grm8,Stx1b,Mctp1,Git1	8/123
5_Member	GO Biological Processes	GO:0050804	modulation of chemical synaptic transmission	-3.16773	-0.275375	11419,12287,12290,12889,14823,16176,17295,18196,18803,20512,56216,56808,60613,78771,100986,111173,214162,216963,223435,243764	Asic1,Cacna1b,Cacna1e,Cplx1,Grm8,Il1b,Met,Nsg1,Plcg1,Slc1a3,Stx1b,Cacna2d2,Kcnq4,Mctp1,Akap9,Erc1,Kmt2a,Git1,Trio,Chrm2	20/740
5_Member	GO Biological Processes	GO:0099177	regulation of trans-synaptic signaling	-3.1605	-0.275375	11419,12287,12290,12889,14823,16176,17295,18196,18803,20512,56216,56808,60613,78771,100986,111173,214162,216963,223435,243764	Asic1,Cacna1b,Cacna1e,Cplx1,Grm8,Il1b,Met,Nsg1,Plcg1,Slc1a3,Stx1b,Cacna2d2,Kcnq4,Mctp1,Akap9,Erc1,Kmt2a,Git1,Trio,Chrm2	20/741
5_Member	GO Biological Processes	GO:0031630	regulation of synaptic vesicle fusion to presynaptic active zone membrane	-2.83808	-0.129816	12287,12889,111173	Cacna1b,Cplx1,Erc1	3/19
5_Member	GO Biological Processes	GO:1901632	regulation of synaptic vesicle membrane organization	-2.83808	-0.129816	12287,12889,111173	Cacna1b,Cplx1,Erc1	3/19
5_Member	KEGG Pathway	mmu04721	Synaptic vesicle cycle - Mus musculus (house mouse)	-2.6232	-0.0670355	11772,12287,12889,20512,56216	Ap2a2,Cacna1b,Cplx1,Slc1a3,Stx1b	5/77
5_Member	GO Biological Processes	GO:0001505	regulation of neurotransmitter levels	-2.60695	-0.0670355	11419,12287,12290,12889,14823,56216,78771,111173,216963	Asic1,Cacna1b,Cacna1e,Cplx1,Grm8,Stx1b,Mctp1,Erc1,Git1	9/238
5_Member	GO Cellular Components	GO:0048786	presynaptic active zone	-2.45617	0	12287,14823,56216,71732,111173,223435	Cacna1b,Grm8,Stx1b,Vps11,Erc1,Trio	6/121
5_Member	GO Biological Processes	GO:0007268	chemical synaptic transmission	-2.31515	0	11419,12287,12290,12889,14397,14823,17295,18196,56216,111173,243764	Asic1,Cacna1b,Cacna1e,Cplx1,Gabra4,Grm8,Met,Nsg1,Stx1b,Erc1,Chrm2	11/364
5_Member	GO Biological Processes	GO:0098916	anterograde trans-synaptic signaling	-2.31515	0	11419,12287,12290,12889,14397,14823,17295,18196,56216,111173,243764	Asic1,Cacna1b,Cacna1e,Cplx1,Gabra4,Grm8,Met,Nsg1,Stx1b,Erc1,Chrm2	11/364
5_Member	GO Biological Processes	GO:0007269	neurotransmitter secretion	-2.27045	0	11419,12287,12889,56216,111173	Asic1,Cacna1b,Cplx1,Stx1b,Erc1	5/93
5_Member	GO Biological Processes	GO:0099643	signal release from synapse	-2.27045	0	11419,12287,12889,56216,111173	Asic1,Cacna1b,Cplx1,Stx1b,Erc1	5/93
5_Member	GO Cellular Components	GO:0098978	glutamatergic synapse	-2.19668	0	11519,11776,12287,12889,13860,14823,18196,18803,100986,111173,216963,223435,243634,243764,245446,442801	Add2,Ap3d1,Cacna1b,Cplx1,Eps8,Grm8,Nsg1,Plcg1,Akap9,Erc1,Git1,Trio,Ano2,Chrm2,Slitrk4,Arhgef15	16/658
5_Member	GO Biological Processes	GO:0099537	trans-synaptic signaling	-2.15459	0	11419,12287,12290,12889,14397,14823,17295,18196,56216,111173,243764	Asic1,Cacna1b,Cacna1e,Cplx1,Gabra4,Grm8,Met,Nsg1,Stx1b,Erc1,Chrm2	11/383
5_Member	GO Biological Processes	GO:0031338	regulation of vesicle fusion	-2.10507	0	12287,12889,111173	Cacna1b,Cplx1,Erc1	3/34
5_Member	GO Biological Processes	GO:0060627	regulation of vesicle-mediated transport	-2.08957	0	12287,12290,12889,14962,16176,18805,19246,20239,56216,71732,76338,78771,93742,111173,216963	Cacna1b,Cacna1e,Cplx1,Cfb,Il1b,Pld1,Ptpn1,Atxn2,Stx1b,Vps11,Rab2b,Mctp1,Pard3,Erc1,Git1	15/617
6_Summary	GO Molecular Functions	GO:0005509	calcium ion binding	-4.09291	-0.780134	11688,11745,11746,11749,12287,12290,14061,18803,20191,22138,22295,23836,52020,70894,75568,78771,83921,216001,240675,381812	Alox8,Anxa3,Anxa4,Anxa6,Cacna1b,Cacna1e,F2,Plcg1,Ryr2,Ttn,Cdh23,Cdh20,Umodl1,Efcab3,Capsl,Mctp1,Cemip2,Micu1,Vwa2,Cracr2a	20/-
6_Member	GO Molecular Functions	GO:0005509	calcium ion binding	-4.09291	-0.780134	11688,11745,11746,11749,12287,12290,14061,18803,20191,22138,22295,23836,52020,70894,75568,78771,83921,216001,240675,381812	Alox8,Anxa3,Anxa4,Anxa6,Cacna1b,Cacna1e,F2,Plcg1,Ryr2,Ttn,Cdh23,Cdh20,Umodl1,Efcab3,Capsl,Mctp1,Cemip2,Micu1,Vwa2,Cracr2a	20/628
7_Summary	GO Biological Processes	GO:0060155	platelet dense granule organization	-4.0673	-0.780134	11303,11776,12807,192236,11749,19153,56216,66736,71732,76338,110350,225326,227648	Abca1,Ap3d1,Hps3,Hps1,Anxa6,Prx,Stx1b,Emc2,Vps11,Rab2b,Dync2h1,Pik3c3,Sec16a	13/-
7_Member	GO Biological Processes	GO:0060155	platelet dense granule organization	-4.0673	-0.780134	11303,11776,12807,192236	Abca1,Ap3d1,Hps3,Hps1	4/20
7_Member	GO Biological Processes	GO:1903232	melanosome assembly	-2.83808	-0.129816	11776,12807,192236	Ap3d1,Hps3,Hps1	3/19
7_Member	GO Biological Processes	GO:0033363	secretory granule organization	-2.15313	0	11303,11776,12807,192236	Abca1,Ap3d1,Hps3,Hps1	4/63
7_Member	GO Biological Processes	GO:0010256	endomembrane system organization	-2.0678	0	11303,11749,11776,12807,19153,56216,66736,71732,76338,110350,192236,225326,227648	Abca1,Anxa6,Ap3d1,Hps3,Prx,Stx1b,Emc2,Vps11,Rab2b,Dync2h1,Hps1,Pik3c3,Sec16a	13/505
8_Summary	GO Biological Processes	GO:0031503	protein-containing complex localization	-4.06396	-0.780134	11772,11776,18196,56216,74190,100986,103573,110350,216963,252875,12889,111173,227801,13860	Ap2a2,Ap3d1,Nsg1,Stx1b,Exoc3l4,Akap9,Xpo1,Dync2h1,Git1,Mios,Cplx1,Erc1,Dennd1a,Eps8	14/-
8_Member	GO Biological Processes	GO:0031503	protein-containing complex localization	-4.06396	-0.780134	11772,11776,18196,56216,74190,100986,103573,110350,216963,252875	Ap2a2,Ap3d1,Nsg1,Stx1b,Exoc3l4,Akap9,Xpo1,Dync2h1,Git1,Mios	10/185
8_Member	GO Biological Processes	GO:0099003	vesicle-mediated transport in synapse	-2.89808	-0.137895	11772,11776,12889,18196,56216,111173,216963,227801	Ap2a2,Ap3d1,Cplx1,Nsg1,Stx1b,Erc1,Git1,Dennd1a	8/174
8_Member	GO Biological Processes	GO:0099072	regulation of postsynaptic membrane neurotransmitter receptor levels	-2.3513	0	11772,13860,18196,56216,216963	Ap2a2,Eps8,Nsg1,Stx1b,Git1	5/89
8_Member	GO Biological Processes	GO:0099637	neurotransmitter receptor transport	-2.21784	0	11776,18196,56216	Ap3d1,Nsg1,Stx1b	3/31
9_Summary	GO Biological Processes	GO:0035234	ectopic germ cell programmed cell death	-3.97965	-0.780134	13194,16176,83558,671232	Ddb1,Il1b,Tex11,Topaz1	4/-
9_Member	GO Biological Processes	GO:0035234	ectopic germ cell programmed cell death	-3.97965	-0.780134	13194,16176,83558,671232	Ddb1,Il1b,Tex11,Topaz1	4/21
9_Member	GO Biological Processes	GO:0010623	programmed cell death involved in cell development	-3.5371	-0.495192	13194,16176,83558,671232	Ddb1,Il1b,Tex11,Topaz1	4/27
10_Summary	GO Biological Processes	GO:0000226	microtubule cytoskeleton organization	-3.85198	-0.703612	12190,12338,16319,16563,24061,29877,69737,93742,99512,100986,110084,212307,212517,216274,241516,320923,327954,381741,208146,216963,217335,328660,381110,74143,110350	Brca2,Capn6,Incenp,Kif2a,Smc1a,Hdgfl3,Ttl,Pard3,Wdr47,Akap9,Dnah1,Mapre2,Cfap44,Cep290,Fsip2,Map7d3,Dnah2,Lrrc43,Yeats2,Git1,Fbf1,Bex6,Rmdn2,Opa1,Dync2h1	25/-
10_Member	GO Biological Processes	GO:0000226	microtubule cytoskeleton organization	-3.85198	-0.703612	12190,12338,16319,16563,24061,29877,69737,93742,99512,100986,110084,212307,212517,216274,241516,320923,327954,381741	Brca2,Capn6,Incenp,Kif2a,Smc1a,Hdgfl3,Ttl,Pard3,Wdr47,Akap9,Dnah1,Mapre2,Cfap44,Cep290,Fsip2,Map7d3,Dnah2,Lrrc43	18/553
10_Member	GO Cellular Components	GO:0005819	spindle	-2.8191	-0.125256	12338,16319,16563,24061,69737,93742,208146,212307,216963,217335,328660,381110	Capn6,Incenp,Kif2a,Smc1a,Ttl,Pard3,Yeats2,Mapre2,Git1,Fbf1,Bex6,Rmdn2	12/361
10_Member	GO Cellular Components	GO:0005874	microtubule	-2.10301	0	12338,16319,16563,69737,74143,99512,110084,110350,212307,327954,328660,381110	Capn6,Incenp,Kif2a,Ttl,Opa1,Wdr47,Dnah1,Dync2h1,Mapre2,Dnah2,Bex6,Rmdn2	12/444
10_Member	GO Cellular Components	GO:0000922	spindle pole	-2.07846	0	16563,24061,216963,217335,328660,381110	Kif2a,Smc1a,Git1,Fbf1,Bex6,Rmdn2	6/145
11_Summary	GO Cellular Components	GO:0019898	extrinsic component of membrane	-3.60121	-0.519798	11688,14693,20191,22295,23836,54636,66736,74718,100986,217695,223435,225326,80877	Alox8,Gnb2,Ryr2,Cdh23,Cdh20,Wdr45,Emc2,Snx16,Akap9,Zfyve1,Trio,Pik3c3,Lrba	13/-
11_Member	GO Cellular Components	GO:0019898	extrinsic component of membrane	-3.60121	-0.519798	11688,14693,20191,22295,23836,54636,66736,74718,100986,217695,223435,225326	Alox8,Gnb2,Ryr2,Cdh23,Cdh20,Wdr45,Emc2,Snx16,Akap9,Zfyve1,Trio,Pik3c3	12/294
11_Member	GO Biological Processes	GO:0034497	protein localization to phagophore assembly site	-3.06462	-0.238724	54636,80877,225326	Wdr45,Lrba,Pik3c3	3/16
11_Member	GO Cellular Components	GO:0000407	phagophore assembly site	-2.03601	0	54636,217695,225326	Wdr45,Zfyve1,Pik3c3	3/36
12_Summary	GO Biological Processes	GO:0010799	regulation of peptidyl-threonine phosphorylation	-3.47863	-0.467499	17295,22068,83946,93742,94088	Met,Trpc6,Phip,Pard3,Trim6	5/-
12_Member	GO Biological Processes	GO:0010799	regulation of peptidyl-threonine phosphorylation	-3.47863	-0.467499	17295,22068,83946,93742,94088	Met,Trpc6,Phip,Pard3,Trim6	5/50
12_Member	GO Biological Processes	GO:0010800	positive regulation of peptidyl-threonine phosphorylation	-3.29996	-0.343481	17295,22068,83946,94088	Met,Trpc6,Phip,Trim6	4/31
13_Summary	GO Biological Processes	GO:0051702	biological process involved in interaction with symbiont	-3.47319	-0.467499	13194,14061,15364,15510,101613,217695,225326,11745,16176	Ddb1,F2,Hmga2,Hspd1,Nlrp6,Zfyve1,Pik3c3,Anxa3,Il1b	9/-
13_Member	GO Biological Processes	GO:0051702	biological process involved in interaction with symbiont	-3.47319	-0.467499	13194,14061,15364,15510,101613,217695,225326	Ddb1,F2,Hmga2,Hspd1,Nlrp6,Zfyve1,Pik3c3	7/108
13_Member	GO Biological Processes	GO:0002446	neutrophil mediated immunity	-2.53747	-0.049012	11745,14061,101613	Anxa3,F2,Nlrp6	3/24
13_Member	GO Biological Processes	GO:0048710	regulation of astrocyte differentiation	-2.00311	0	14061,15364,16176	F2,Hmga2,Il1b	3/37
14_Summary	GO Molecular Functions	GO:0003774	cytoskeletal motor activity	-3.21871	-0.292201	16563,17880,71960,110084,110350,231646,327954,11303,15510,24061,50790,55993,117599,216799,217265,269610,320790	Kif2a,Myh11,Myh14,Dnah1,Dync2h1,Myo1h,Dnah2,Abca1,Hspd1,Smc1a,Acsl4,Msh4,Helb,Nlrp3,Abca5,Chd5,Chd7	17/-
14_Member	GO Molecular Functions	GO:0003774	cytoskeletal motor activity	-3.21871	-0.292201	16563,17880,71960,110084,110350,231646,327954	Kif2a,Myh11,Myh14,Dnah1,Dync2h1,Myo1h,Dnah2	7/119
14_Member	GO Molecular Functions	GO:0140657	ATP-dependent activity	-3.16569	-0.275375	11303,15510,16563,17880,24061,50790,55993,71960,110084,110350,117599,216799,217265,231646,269610,320790,327954	Abca1,Hspd1,Kif2a,Myh11,Smc1a,Acsl4,Msh4,Myh14,Dnah1,Dync2h1,Helb,Nlrp3,Abca5,Myo1h,Chd5,Chd7,Dnah2	17/578
14_Member	GO Molecular Functions	GO:0008569	minus-end-directed microtubule motor activity	-2.77136	-0.108087	110084,110350,327954	Dnah1,Dync2h1,Dnah2	3/20
14_Member	GO Molecular Functions	GO:0051959	dynein light intermediate chain binding	-2.70827	-0.103976	110084,110350,327954	Dnah1,Dync2h1,Dnah2	3/21
14_Member	GO Molecular Functions	GO:0045505	dynein intermediate chain binding	-2.17892	0	110084,110350,327954	Dnah1,Dync2h1,Dnah2	3/32
14_Member	KEGG Pathway	mmu04814	Motor proteins - Mus musculus (house mouse)	-2.00762	0	16563,17880,71960,110084,110350,231646,327954	Kif2a,Myh11,Myh14,Dnah1,Dync2h1,Myo1h,Dnah2	7/196
15_Summary	GO Biological Processes	GO:0033365	protein localization to organelle	-3.10318	-0.238724	11776,12021,12190,14545,15510,20191,20335,66736,67025,73692,74718,77048,83946,103573,110350,212307,216963,225326,227648,241516	Ap3d1,Bard1,Brca2,Gdap1,Hspd1,Ryr2,Sec61g,Emc2,Rpl11,Cplane1,Snx16,Cep83,Phip,Xpo1,Dync2h1,Mapre2,Git1,Pik3c3,Sec16a,Fsip2	20/-
15_Member	GO Biological Processes	GO:0033365	protein localization to organelle	-3.10318	-0.238724	11776,12021,12190,14545,15510,20191,20335,66736,67025,73692,74718,77048,83946,103573,110350,212307,216963,225326,227648,241516	Ap3d1,Bard1,Brca2,Gdap1,Hspd1,Ryr2,Sec61g,Emc2,Rpl11,Cplane1,Snx16,Cep83,Phip,Xpo1,Dync2h1,Mapre2,Git1,Pik3c3,Sec16a,Fsip2	20/749
16_Summary	GO Molecular Functions	GO:0005085	guanyl-nucleotide exchange factor activity	-3.06827	-0.238724	55949,67425,105445,192236,223435,227801,237422,238130,442801,216963,243362,259302	Eef1b2,Eps8l1,Dock9,Hps1,Trio,Dennd1a,Ric8b,Dock4,Arhgef15,Git1,Stard13,Srgap3	12/-
16_Member	GO Molecular Functions	GO:0005085	guanyl-nucleotide exchange factor activity	-3.06827	-0.238724	55949,67425,105445,192236,223435,227801,237422,238130,442801	Eef1b2,Eps8l1,Dock9,Hps1,Trio,Dennd1a,Ric8b,Dock4,Arhgef15	9/204
16_Member	GO Molecular Functions	GO:0030695	GTPase regulator activity	-2.20861	0	55949,67425,105445,192236,216963,223435,227801,237422,238130,243362,259302,442801	Eef1b2,Eps8l1,Dock9,Hps1,Git1,Trio,Dennd1a,Ric8b,Dock4,Stard13,Srgap3,Arhgef15	12/430
16_Member	GO Molecular Functions	GO:0060589	nucleoside-triphosphatase regulator activity	-2.17788	0	55949,67425,105445,192236,216963,223435,227801,237422,238130,243362,259302,442801	Eef1b2,Eps8l1,Dock9,Hps1,Git1,Trio,Dennd1a,Ric8b,Dock4,Stard13,Srgap3,Arhgef15	12/434
17_Summary	GO Cellular Components	GO:0030061	mitochondrial crista	-3.06462	-0.238724	15510,19246,74143	Hspd1,Ptpn1,Opa1	3/-
17_Member	GO Cellular Components	GO:0030061	mitochondrial crista	-3.06462	-0.238724	15510,19246,74143	Hspd1,Ptpn1,Opa1	3/16
18_Summary	GO Biological Processes	GO:0031110	regulation of microtubule polymerization or depolymerization	-3.06258	-0.238724	17295,29877,99512,100986,212307,216963	Met,Hdgfl3,Wdr47,Akap9,Mapre2,Git1	6/-
18_Member	GO Biological Processes	GO:0031110	regulation of microtubule polymerization or depolymerization	-3.06258	-0.238724	17295,29877,99512,100986,212307,216963	Met,Hdgfl3,Wdr47,Akap9,Mapre2,Git1	6/92
18_Member	GO Biological Processes	GO:0031116	positive regulation of microtubule polymerization	-2.21784	0	17295,100986,216963	Met,Akap9,Git1	3/31
18_Member	GO Biological Processes	GO:0031112	positive regulation of microtubule polymerization or depolymerization	-2.06998	0	17295,100986,216963	Met,Akap9,Git1	3/35
19_Summary	GO Biological Processes	GO:0051258	protein polymerization	-3.01363	-0.201055	29877,69807,76467,94088,100986,320923	Hdgfl3,Trim32,Msrb2,Trim6,Akap9,Map7d3	6/-
19_Member	GO Biological Processes	GO:0051258	protein polymerization	-3.01363	-0.201055	29877,69807,76467,94088,100986,320923	Hdgfl3,Trim32,Msrb2,Trim6,Akap9,Map7d3	6/94
20_Summary	GO Cellular Components	GO:0031672	A band	-3.00251	-0.200938	20191,22138,242702,320502,69807	Ryr2,Ttn,Myom3,Lmod3,Trim32	5/-
20_Member	GO Cellular Components	GO:0031672	A band	-3.00251	-0.200938	20191,22138,242702,320502	Ryr2,Ttn,Myom3,Lmod3	4/37
20_Member	GO Cellular Components	GO:0031430	M band	-2.90885	-0.138685	22138,242702,320502	Ttn,Myom3,Lmod3	3/18
20_Member	GO Cellular Components	GO:0036379	myofilament	-2.38909	0	22138,69807,320502	Ttn,Trim32,Lmod3	3/27
